# Supplementary material for: An ancient and still ongoing genetic conflict between transposable elements and their repressors
Source: Research Square preprint supplement (doi:10.21203/rs.3.rs-5675976/v1), 2024-12-23
Supplement: Supplementary file 1 [file 65583f447040b0069de5242e.xlsx]

## Sheet: Table description
Additional file 1:
Table S1. List of primate species used for the positive selection analysis
Table S2. Likelihood ratio test statistics for models of variable selective pressure among sites (F3x4)
Table S3. Conformational parameters for all primate IDRs
Table S4. Domain composition of PIWI-containing proteins in eukaryotes
Table S5. Foldseek results of structural homology searches with human Ago/Piwi proteins
Table S6. List of proteins used to generate the tree of MID-PIWI domains of representative prokaryotic and eukaryotic Agos/Piwis
Table S7. List of proteins used to generate the multiple structure alignment
Table S8. List of proteins used to generate the multiple alignments of N-terminal and C-terminal IDRs
Table S9. Summary statistics minimum ranks for TE control genes.

## Sheet: Table S1
Table S1. List of primate species used for the positive selection analysis
Scientific name	Common name	Abbreviation	ADNP	AGO1	AGO2	AGO3	AGO4	CBX1	CBX3	CDK2AP1	CHD3	CHD4	CHD5	DDX4	DHX9	DNMT1	DNMT3A	DNMT3B	DNMT3L	GATAD2A	GATAD2B	GTSF1	GTSF1L	HDAC1	HDAC2	HNRNPC	MBD2	MBD3	METTL14	METTL3	MORC2	MOV10	MOV10L1		MPHOSPH8	MTA1	MTA2	MTA3	PIWIL1	PIWIL2	PIWIL3		PIWIL4	PLD6	PPHLN1	RBBP4	RBBP7	SAFB	SAFB2
																																	Reg1	Reg2							Reg1	Reg2
Aotus nancymaae	Ma's night monkey	aotNan
Callithrix jacchus	White-tufted-ear marmoset	calJac
Cercocebus atys	Sooty mangabey	carAty
Carlito syrichta	Philippine tarsier	carSyr
Cebus imitator	Panamanian white-faced capuchin	cebImi
Chlorocebus sabaeus	Green monkey	chlSab
Colobus angolensis palliatus	Angola colobus	colAng
Gorilla gorilla gorilla	Western lowland gorilla	gorGor
Homo sapiens	Human	homSap
Hylobates moloch	Silvery gibbon	hylMol
Lemur catta	Ring-tailed lemur	lemCat
Macaca fascicularis	Crab-eating macaque	macFas
Macaca mulatta	Rhesus monkey	macMul
Macaca nemestrina	Pig-tailed macaque	macNem
Macaca thibetana thibetana	Tibetan macaque	macThi
Mandrillus leucophaeus	Drill	manLeu
Microcebus murinus	Gray mouse lemur	micMur
Nomascus leucogenys	Northern white-cheeked gibbon	nomLeu
Nycticebus coucang	Slow loris	nycCou
Otolemur garnettii	Small-eared galago	otoGar
Pan paniscus	Pygmy chimpanzee	panPan
Pan troglodytes	Chimpanzee	panTro
Papio anubis	Olive baboon	papAnu
Piliocolobus tephrosceles	Ugandan red colobus	pilTep
Pongo abelii	Sumatran orangutan	ponAbe
Pongo pygmaeus	Bornean orangutan	ponPyg
Propithecus coquereli	Coquerel's sifaka	proCoq
Rhinopithecus bieti	Black snub-nosed monkey	rhiBie
Rhinopithecus roxellana	Golden snub-nosed monkey	rhiRox
Saimiri boliviensis	Bolivian squirrel monkey	saiBol
Sapajus apella	Tufted capuchin	sapApe
Symphalangus syndactylus	Siamang	symSyn
Theropithecus gelada	Gelada	theGel
Trachypithecus francoisi	Francois's langur	traFra
[truncated: 15 more columns]

## Sheet: Table S2
Table S2. Likelihood ratio test statistics for models of variable selective pressure among sites (F3x4).
Gene	RefSeq Protein accession		GARD				Number of primate species		PAML analysis						Positively selected sites		Number of IDR		Branches under episodic selection
									M7 vs M8			M8a vs M8			(positively selected sites in IDRs in blue; * positive selected sites reported in previous studies)				Number	Species
(Red, genes under positive selection)			Recombination Breakpoint		Analyzed protein regions				-2ΔlnLa	P value (df=2)b		-2ΔlnLa	P value (df=1)b
ADNP	NP_001269460.1		no break		1-1102		34		0.650828	0.722228		0	1				4		0
AGO1	NP_036331.1		no break		1-857		25		0.016256	0.991905		0.00515	0.94279				1		0
AGO2	NP_036286.2		no break		1-859		34		0.017152	0.991461		0.68636	0.407405				2		0
AGO3	NP_079128.2		no break		1-860		19		0.003022	0.99849		0	1				1		0
AGO4	NP_060099.2		no break		1-861		22		17.7776	0.000137926		0.586712	0.443693				1		2	macNem,rhiBie
CBX1	NP_001120700.1		no break		1-185		32		0.002294	0.998854		0	1				1		0
CBX3	NP_057671.2		no break		1-183		34		0.003446	0.998278		1.89271	0.168897				1		1	rhiBie
CDK2AP1	NP_004633.1		no break		1-115		32		0.703004	0.70363		0	1				1		0
CHD3	NP_001005273.1		no break		34-1863		33		2.98756	0.224522		0.000792	0.977549				6		0
CHD4	NP_001264.2		no break		1-1912		34		19.4631	5.94e-05		0.0009	0.976067				5		0
CHD5	NP_056372.1		no break		1-1954		34		3.0116	0.22184		0	1				6		0
DDX4	NP_077726.1		no break		1-724		34		0.001618	0.999191		0.001554	0.968555				2		1	manLeu
DHX9	NP_001348.2		no break		1-1270		34		0	1		0.709798	0.399511				3		0
DNMT1	NP_001124295.1		no break		1-1632		34		9.3416	0.00936479		1.51969	0.217666				3		0
DNMT3A	NP_072046.2		no break		1-912		33		21.851	1.8e-05		13.8007	0.000203259		P69*,A84*		2		0
DNMT3B	NP_008823.1		no break		1-853		33		3.67967	0.158843		1.38967	0.23846				2		0
DNMT3L	NP_787063.1		no break		1-386		33		7.37981	0.0249743		1.76095	0.184507				1		0
GATAD2A	NP_001371457.1		no break		1-634		34		2.21865	0.329782		0.001498	0.969126				3		1	calJac
GATAD2B	NP_065750.1		no break		1-593		33		0.000812	0.999594		0.280268	0.596526				3		1	carAty
GTSF1	NP_789761.1		no break		1-148		34		0.00011	0.999945		0	1				1		0
GTSF1L	NP_653195.2		no break		1-167		32		5.08158	0.0788041		5.01126	0.025183				1		0
HDAC1	NP_004955.2		no break		1-482		34		0.000108	0.999946		0.526032	0.46828				1		0
HDAC2	NP_001518.3		no break		1-488		34		0.001146	0.999427		0	1				1		1	ponAbe
HNRNPC	NP_004491.2		no break		1-293		31		2.8e-05	0.999986		0	1				1		1	carAty
MBD2	NP_003918.1		no break		1-411		33		5e-05	0.999975		0	1				1		1	micMur
MBD3	NP_001268382.1		no break		1-291		32		0.003252	0.998375		0	1				2		1	pilTep
METTL14	NP_066012.1		no break		1-456		34		3.02001	0.220909		0.000214	0.988328				2		0
METTL3	NP_062826.2		no break		1-580		34		4.82135	0.0897545		2.07963	0.149276				2		0
MORC2	NP_001290185.1		no break		1-1032		34		20.9533	2.82e-05		11.9151	0.000556821		R153*,S730*		2		1	colAng
MOV10	NP_001308253.1		no break		1-1003		34		2.97756	0.225648		0.846308	0.357599				1		0
MOV10L1	NP_061868.1		1 break point		1211										T18,L26		3
				Reg1	1-182		31		23.4919	7.92e-06		19.9803	7.82e-06						0
				Reg2	183-1211		34		1.33644	0.512619		0	1						2	manLeu,lemCat
MPHOSPH8	NP_059990.2		no break		1-860		33		23.9106	6.43e-06		2.64131	0.104117				2		0
MTA1	NP_004680.2		no break		1-715		32		5.01219	0.0815863		0	1				3		0
MTA2	NP_004730.2		no break		1-668		33		3.78499	0.150695		0.504712	0.477437				1		0
MTA3	NP_001317371.1		no break		1-594		34		12.4169	0.00201234		2.75598	0.0968913				3		0
PIWIL1	NP_004755.2		no break		1-861		34		0.59484	0.742732		0.112632	0.737167				1		1	chlSab
PIWIL2	NP_060538.2		no break		1-973		32		20.1249	4.27e-05		9.08601	0.00257572		L88,P94,S95		1		0
PIWIL3	NP_001242904.1		1 break point		873										L58,A67,R185,R190,L235,I310,R311,E344,R362,H403,R450,S517,H519,S524,Q530,D557,R560,T739,I740		1
				Reg1	1-46		na		na	na		na	na						na
				Reg2	47-873		26		45.8732	1.09x10-10		35.0509	3.21x10-9						4	micMur,saiBol,carAty,lemCat
PIWIL4	NP_689644.2		no break		1-852		34		13.1714	0.00137994		4.15565	0.0414959		I12,A26,R31,D56,Q78,Q180,Q282,T290,Q371,S512,R645,H848		1		0
PLD6	NP_849158.2		no break		1-252		28		0.078048	0.03		0	1				0		2	papAnu,calJac
PPHLN1	NP_057572.5		no break		1-341		32		0	1		0	1						0
RBBP4	NP_005601.1		no break		1-425		34		2.55654	0.2785		0	1				0		1	chlSab
RBBP7	NP_001185648.1		no break		1-425		32		14.817	0.000606076		14.8039	0.000119291		L30,M35,A38				0
SAFB	NP_055464.1		no break		1-953		32		0.651704	0.721912		0.07352	0.786279				3		2	macNem,proCoq
SAFB2	NP_001188267.1		no break		1-917		32		4.65895	0.0973469		0	1				2		2	carAty,proCoq
SETDB1	NP_001353347.1		no break		1-1292		33		0.000156	0.999922		0.000156	0.990035				3		0
SLTM	NP_079031.2		no break		1-1034		32		3.43107	0.179868		0.106788	0.743831				3		1	proCoq
SPOCD1	NP_653170.3		no break		1-1216		34		74.7802	5.78x10-17		50.3273	1.3x10-12		S39,G50,L65,R71,A113,S122,D128,P193,H215,C256,P268,C301,P303,P309,G311,T349,G379,T438,P480,G491,G494,P515,R625,L770,H791,T824,S838,P921,P983,L989,P993,H1105,R1135,T1171,S1173,R1177,R1181,A1187,R1196,P1202,T1203,S1208,E1209,C1210		3		0
TASOR	NP_001352564.1		no break		1-1670		33		7.67249	0.0215744		4.73759	0.0295103		I744,M1182,T1587		4		1	carAty
TET1	NP_085128.2		no break		1-2136		33		11.5551	0.00309634		3.09366	0.0785979				3		2	carAty,micMur
TET2	NP_001120680.1		no break		1-2002		34		23.079	9.74e-06		12.6296	0.000379696		C171,T313,Q324,Q414,L431,K454,A457,L476,N515,Q530,T621,Q626,L676,V698,Q744,L1740		2		0
TET3	NP_001274420.1		no break		1-1795		34		6.60555	0.036781		1.81941	0.177383				4		0
TEX15	NP_001337091.1		no break		1-3172		33		73.188	1.28x10-16		46.3714	9.78x10-12		L398,K470,W509,V544,C597,F778,S933,S996,H1002,C1182,T1284,S1297,Q1352,S1447,R1455,L1680,I1809,L1819,Y1946,V1981,K2160,I2330,L2649,L2677,L2720,V2714,K2834,V2902,M2934,R3150		4		1	otoGar
TNRC18	NP_001073964.2		5 break points		3119
				Reg1	1-1199		32		4.8617	0.087962		0.001108	0.973446						1	manLeu
				Reg2	1200-1505		32		0.213226	0.898873		0.213234	0.644244						0
				Reg3	1506-1896		32		0.09614	0.953067		0	1						1	macMul
				Reg4	1897-2745		32		0.461568	0.793911		0	1						0
				Reg5	2746-2812		na		na	na		na	na						na
				Reg6	2813-3119		31		2.50799	0.285362		0.83826	0.359895						0
TRIM28	NP_005753.1		no break		1-835		34		0.07059	0.965321		0	1				3		1	macMul
TUT4	NP_001009881.1		no break		1-1645		34		12.0534	0.0024135		4.27162	0.0387539		G30,A121,R211,V1340		5		1	rhiBie
TUT7	NP_078893.2		no break		1-1495		34		19.5524	5.68e-05		8.4151	0.00372117		V506,Q767,V908		3		0
WTAP	NP_001257460.1		no break		1-396		33		11.4208	0.00331133		11.4209	0.000726212		T16,A22,I27,V329		1		0
YTHDC1	NP_001026902.1		no break		1-727		34		0.001958	0.999022		0.109892	0.740267				2		2	rhiBie,pilTep
ZC3H13	NP_001317493.1		no break		1-1669		33		8.20706	0.0165143		0	1				2		0
Note
a -2ΔlnL: twice the difference of the natural logs of the maximum likelihood of the models being compared;
b p value: p value of rejecting the neutral models in favor of the positive selection model; df: degrees of freedom.
na: not analyzed

## Sheet: Table S3
Table S3. Conformational parameters for all primate IDRs.
IDR	ν	Sconf/N	SHD	FCR	NCPR
ADNP-r0-Aotus_nancymaae	0.547	10.007	4.493	0.12	0.087
ADNP-r0-Callithrix_jacchus	0.547	10.007	4.491	0.12	0.087
ADNP-r0-Carlito_syrichta	0.547	10.013	4.453	0.12	0.087
ADNP-r0-Cebus_imitator	0.547	10.007	4.491	0.12	0.087
ADNP-r0-Cercocebus_atys	0.547	10.008	4.488	0.12	0.087
ADNP-r0-Chlorocebus_sabaeus	0.547	10.008	4.488	0.12	0.087
ADNP-r0-Colobus_angolensis_palliatus	0.547	10.008	4.488	0.12	0.087
ADNP-r0-Gorilla_gorilla_gorilla	0.547	10.008	4.488	0.12	0.087
ADNP-r0-Homo_sapiens	0.547	10.008	4.488	0.12	0.087
ADNP-r0-Hylobates_moloch	0.547	10.008	4.488	0.12	0.087
ADNP-r0-Lemur_catta	0.547	10.01	4.469	0.12	0.087
ADNP-r0-Macaca_fascicularis	0.547	10.008	4.488	0.12	0.087
ADNP-r0-Macaca_mulatta	0.547	10.008	4.488	0.12	0.087
ADNP-r0-Macaca_nemestrina	0.547	10.008	4.488	0.12	0.087
ADNP-r0-Macaca_thibetana_thibetana	0.547	10.008	4.488	0.12	0.087
ADNP-r0-Mandrillus_leucophaeus	0.547	10.008	4.488	0.12	0.087
ADNP-r0-Microcebus_murinus	0.547	10.01	4.469	0.12	0.087
ADNP-r0-Nomascus_leucogenys	0.547	10.008	4.488	0.12	0.087
ADNP-r0-Nycticebus_coucang	0.547	10.011	4.465	0.12	0.087
ADNP-r0-Otolemur_garnettii	0.547	10.009	4.479	0.12	0.087
ADNP-r0-Pan_paniscus	0.547	10.008	4.488	0.12	0.087
ADNP-r0-Pan_troglodytes	0.547	10.008	4.488	0.12	0.087
ADNP-r0-Papio_anubis	0.547	10.007	4.49	0.12	0.087
ADNP-r0-Piliocolobus_tephrosceles	0.547	10.008	4.488	0.12	0.087
ADNP-r0-Pongo_abelii	0.547	10.008	4.488	0.12	0.087
ADNP-r0-Pongo_pygmaeus	0.547	10.008	4.488	0.12	0.087
ADNP-r0-Propithecus_coquereli	0.547	10.01	4.469	0.12	0.087
ADNP-r0-Rhinopithecus_bieti	0.547	10.008	4.488	0.12	0.087
ADNP-r0-Rhinopithecus_roxellana	0.547	10.008	4.488	0.12	0.087
ADNP-r0-Saimiri_boliviensis	0.547	10.008	4.486	0.12	0.087
ADNP-r0-Sapajus_apella	0.547	10.007	4.491	0.12	0.087
ADNP-r0-Symphalangus_syndactylus	0.547	10.008	4.488	0.12	0.087
ADNP-r0-Theropithecus_gelada	0.547	10.007	4.49	0.12	0.087
ADNP-r0-Trachypithecus_francoisi	0.547	10.008	4.488	0.12	0.087
ADNP-r1-Aotus_nancymaae	0.591	10.388	2.194	0.179	0.077
ADNP-r1-Callithrix_jacchus	0.591	10.388	2.194	0.179	0.077
ADNP-r1-Carlito_syrichta	0.591	10.388	2.194	0.179	0.077
ADNP-r1-Cebus_imitator	0.591	10.388	2.194	0.179	0.077
ADNP-r1-Cercocebus_atys	0.591	10.388	2.194	0.179	0.077
ADNP-r1-Chlorocebus_sabaeus	0.591	10.388	2.194	0.179	0.077
ADNP-r1-Colobus_angolensis_palliatus	0.591	10.388	2.194	0.179	0.077
ADNP-r1-Gorilla_gorilla_gorilla	0.591	10.388	2.194	0.179	0.077
ADNP-r1-Homo_sapiens	0.591	10.388	2.194	0.179	0.077
ADNP-r1-Hylobates_moloch	0.591	10.388	2.194	0.179	0.077
ADNP-r1-Lemur_catta	0.591	10.388	2.194	0.179	0.077
ADNP-r1-Macaca_fascicularis	0.591	10.388	2.194	0.179	0.077
ADNP-r1-Macaca_mulatta	0.591	10.388	2.194	0.179	0.077
ADNP-r1-Macaca_nemestrina	0.591	10.388	2.194	0.179	0.077
ADNP-r1-Macaca_thibetana_thibetana	0.591	10.388	2.194	0.179	0.077
ADNP-r1-Mandrillus_leucophaeus	0.591	10.388	2.194	0.179	0.077
ADNP-r1-Microcebus_murinus	0.591	10.388	2.194	0.179	0.077
ADNP-r1-Nomascus_leucogenys	0.591	10.388	2.194	0.179	0.077
ADNP-r1-Nycticebus_coucang	0.591	10.388	2.194	0.179	0.077
ADNP-r1-Otolemur_garnettii	0.591	10.388	2.194	0.179	0.077
ADNP-r1-Pan_paniscus	0.591	10.388	2.194	0.179	0.077
ADNP-r1-Pan_troglodytes	0.591	10.388	2.194	0.179	0.077
ADNP-r1-Papio_anubis	0.591	10.388	2.194	0.179	0.077
ADNP-r1-Piliocolobus_tephrosceles	0.591	10.388	2.194	0.179	0.077
ADNP-r1-Pongo_abelii	0.591	10.388	2.194	0.179	0.077
ADNP-r1-Pongo_pygmaeus	0.591	10.388	2.194	0.179	0.077
ADNP-r1-Propithecus_coquereli	0.591	10.388	2.194	0.179	0.077
ADNP-r1-Rhinopithecus_bieti	0.591	10.388	2.194	0.179	0.077
ADNP-r1-Rhinopithecus_roxellana	0.591	10.388	2.194	0.179	0.077
ADNP-r1-Saimiri_boliviensis	0.591	10.388	2.194	0.179	0.077
ADNP-r1-Sapajus_apella	0.591	10.388	2.194	0.179	0.077
ADNP-r1-Symphalangus_syndactylus	0.591	10.388	2.194	0.179	0.077
ADNP-r1-Theropithecus_gelada	0.591	10.388	2.194	0.179	0.077
ADNP-r1-Trachypithecus_francoisi	0.591	10.388	2.194	0.179	0.077
ADNP-r2-Aotus_nancymaae	0.503	10.21	2.891	0.373	-0.053
ADNP-r2-Callithrix_jacchus	0.503	10.21	2.891	0.373	-0.053
ADNP-r2-Carlito_syrichta	0.502	10.206	2.918	0.373	-0.053
ADNP-r2-Cebus_imitator	0.503	10.21	2.891	0.373	-0.053
ADNP-r2-Cercocebus_atys	0.503	10.21	2.891	0.373	-0.053
ADNP-r2-Chlorocebus_sabaeus	0.505	10.22	2.819	0.373	-0.053
ADNP-r2-Colobus_angolensis_palliatus	0.503	10.21	2.891	0.373	-0.053
ADNP-r2-Gorilla_gorilla_gorilla	0.503	10.21	2.891	0.373	-0.053
ADNP-r2-Homo_sapiens	0.503	10.21	2.891	0.373	-0.053
ADNP-r2-Hylobates_moloch	0.503	10.21	2.891	0.373	-0.053
ADNP-r2-Lemur_catta	0.502	10.206	2.918	0.373	-0.053
ADNP-r2-Macaca_fascicularis	0.503	10.21	2.891	0.373	-0.053
ADNP-r2-Macaca_mulatta	0.503	10.21	2.891	0.373	-0.053
ADNP-r2-Macaca_nemestrina	0.503	10.21	2.891	0.373	-0.053
ADNP-r2-Macaca_thibetana_thibetana	0.503	10.21	2.891	0.373	-0.053
ADNP-r2-Mandrillus_leucophaeus	0.503	10.21	2.891	0.373	-0.053
ADNP-r2-Microcebus_murinus	0.502	10.206	2.918	0.373	-0.053
ADNP-r2-Nomascus_leucogenys	0.503	10.21	2.891	0.373	-0.053
ADNP-r2-Nycticebus_coucang	0.502	10.206	2.918	0.373	-0.053
ADNP-r2-Otolemur_garnettii	0.502	10.206	2.918	0.373	-0.053
ADNP-r2-Pan_paniscus	0.503	10.21	2.891	0.373	-0.053
ADNP-r2-Pan_troglodytes	0.503	10.21	2.891	0.373	-0.053
ADNP-r2-Papio_anubis	0.503	10.21	2.891	0.373	-0.053
ADNP-r2-Piliocolobus_tephrosceles	0.503	10.21	2.891	0.373	-0.053
ADNP-r2-Pongo_abelii	0.503	10.211	2.886	0.373	-0.053
ADNP-r2-Pongo_pygmaeus	0.503	10.211	2.886	0.373	-0.053
ADNP-r2-Propithecus_coquereli	0.501	10.206	2.922	0.373	-0.053
ADNP-r2-Rhinopithecus_bieti	0.503	10.21	2.891	0.373	-0.053
ADNP-r2-Rhinopithecus_roxellana	0.503	10.21	2.891	0.373	-0.053
ADNP-r2-Saimiri_boliviensis	0.504	10.215	2.857	0.373	-0.053
ADNP-r2-Sapajus_apella	0.503	10.21	2.891	0.373	-0.053
ADNP-r2-Symphalangus_syndactylus	0.503	10.21	2.891	0.373	-0.053
ADNP-r2-Theropithecus_gelada	0.503	10.21	2.891	0.373	-0.053
ADNP-r2-Trachypithecus_francoisi	0.503	10.21	2.891	0.373	-0.053
ADNP-r3-Aotus_nancymaae	0.552	10.162	3.577	0.357	-0.14
ADNP-r3-Callithrix_jacchus	0.552	10.161	3.585	0.357	-0.14
ADNP-r3-Carlito_syrichta	0.549	10.171	3.548	0.352	-0.133
ADNP-r3-Cebus_imitator	0.552	10.161	3.583	0.357	-0.14
ADNP-r3-Cercocebus_atys	0.547	10.159	3.622	0.349	-0.132
ADNP-r3-Chlorocebus_sabaeus	0.543	10.155	3.654	0.345	-0.128
ADNP-r3-Colobus_angolensis_palliatus	0.55	10.161	3.594	0.353	-0.136
ADNP-r3-Gorilla_gorilla_gorilla	0.55	10.161	3.596	0.354	-0.136
ADNP-r3-Homo_sapiens	0.55	10.162	3.589	0.354	-0.136
ADNP-r3-Hylobates_moloch	0.55	10.161	3.597	0.354	-0.136
ADNP-r3-Lemur_catta	0.55	10.168	3.555	0.348	-0.137
ADNP-r3-Macaca_fascicularis	0.547	10.159	3.622	0.349	-0.132
ADNP-r3-Macaca_mulatta	0.547	10.159	3.622	0.349	-0.132
ADNP-r3-Macaca_nemestrina	0.547	10.159	3.622	0.349	-0.132
ADNP-r3-Macaca_thibetana_thibetana	0.547	10.159	3.622	0.349	-0.132
ADNP-r3-Mandrillus_leucophaeus	0.547	10.159	3.622	0.349	-0.132
ADNP-r3-Microcebus_murinus	0.552	10.169	3.534	0.352	-0.141
ADNP-r3-Nomascus_leucogenys	0.55	10.161	3.597	0.354	-0.136
ADNP-r3-Nycticebus_coucang	0.543	10.164	3.603	0.348	-0.129
ADNP-r3-Otolemur_garnettii	0.543	10.164	3.6	0.348	-0.129
ADNP-r3-Pan_paniscus	0.545	10.161	3.614	0.35	-0.132
ADNP-r3-Pan_troglodytes	0.545	10.161	3.614	0.35	-0.132
ADNP-r3-Papio_anubis	0.547	10.159	3.622	0.349	-0.132
ADNP-r3-Piliocolobus_tephrosceles	0.55	10.161	3.594	0.353	-0.136
ADNP-r3-Pongo_abelii	0.55	10.161	3.597	0.354	-0.136
ADNP-r3-Pongo_pygmaeus	0.55	10.161	3.597	0.354	-0.136
ADNP-r3-Propithecus_coquereli	0.553	10.17	3.527	0.352	-0.141
ADNP-r3-Rhinopithecus_bieti	0.55	10.161	3.594	0.353	-0.136
ADNP-r3-Rhinopithecus_roxellana	0.55	10.161	3.594	0.353	-0.136
ADNP-r3-Saimiri_boliviensis	0.549	10.161	3.594	0.36	-0.136
ADNP-r3-Sapajus_apella	0.552	10.161	3.583	0.357	-0.14
ADNP-r3-Symphalangus_syndactylus	0.55	10.161	3.597	0.354	-0.136
ADNP-r3-Theropithecus_gelada	0.547	10.159	3.622	0.349	-0.132
ADNP-r3-Trachypithecus_francoisi	0.55	10.161	3.594	0.353	-0.136
AGO1-r0-Aotus_nancymaae	0.563	10.282	2.809	0.237	-0.026
AGO1-r0-Callithrix_jacchus	0.563	10.282	2.809	0.237	-0.026
AGO1-r0-Carlito_syrichta	0.563	10.282	2.809	0.237	-0.026
AGO1-r0-Cebus_imitator	0.563	10.282	2.809	0.237	-0.026
AGO1-r0-Chlorocebus_sabaeus	0.563	10.282	2.809	0.237	-0.026
AGO1-r0-Colobus_angolensis_palliatus	0.563	10.282	2.809	0.237	-0.026
AGO1-r0-Gorilla_gorilla_gorilla	0.563	10.282	2.809	0.237	-0.026
AGO1-r0-Homo_sapiens	0.563	10.282	2.809	0.237	-0.026
AGO1-r0-Hylobates_moloch	0.565	10.285	2.782	0.205	-0.051
AGO1-r0-Macaca_mulatta	0.533	10.161	3.291	0.288	0.014
AGO1-r0-Macaca_nemestrina	0.563	10.282	2.809	0.237	-0.026
AGO1-r0-Mandrillus_leucophaeus	0.563	10.282	2.809	0.237	-0.026
AGO1-r0-Microcebus_murinus	0.563	10.282	2.809	0.237	-0.026
AGO1-r0-Nomascus_leucogenys	0.563	10.282	2.809	0.237	-0.026
AGO1-r0-Otolemur_garnettii	0.563	10.282	2.809	0.237	-0.026
AGO1-r0-Pan_paniscus	0.563	10.282	2.809	0.237	-0.026
AGO1-r0-Papio_anubis	0.563	10.282	2.809	0.237	-0.026
AGO1-r0-Piliocolobus_tephrosceles	0.563	10.282	2.809	0.237	-0.026
AGO1-r0-Pongo_abelii	0.563	10.282	2.809	0.237	-0.026
AGO1-r0-Pongo_pygmaeus	0.563	10.282	2.809	0.237	-0.026
AGO1-r0-Propithecus_coquereli	0.563	10.282	2.809	0.237	-0.026
AGO1-r0-Rhinopithecus_roxellana	0.563	10.282	2.809	0.237	-0.026
AGO1-r0-Saimiri_boliviensis	0.563	10.282	2.809	0.237	-0.026
AGO1-r0-Symphalangus_syndactylus	0.565	10.285	2.782	0.205	-0.051
AGO1-r0-Theropithecus_gelada	0.563	10.282	2.809	0.237	-0.026
AGO2-r0-Aotus_nancymaae	0.567	10.294	2.826	0.156	0.031
AGO2-r0-Callithrix_jacchus	0.567	10.294	2.826	0.156	0.031
AGO2-r0-Gorilla_gorilla_gorilla	0.567	10.294	2.826	0.156	0.031
AGO2-r0-Homo_sapiens	0.567	10.298	2.82	0.161	0.032
AGO2-r0-Lemur_catta	0.568	10.297	2.813	0.156	0.031
AGO2-r0-Macaca_mulatta	0.567	10.294	2.826	0.156	0.031
AGO2-r0-Macaca_thibetana_thibetana	0.567	10.294	2.826	0.156	0.031
AGO2-r0-Microcebus_murinus	0.569	10.305	2.767	0.156	0.031
AGO2-r0-Nomascus_leucogenys	0.567	10.294	2.826	0.156	0.031
AGO2-r0-Nycticebus_coucang	0.567	10.301	2.806	0.161	0.032
AGO2-r0-Pan_paniscus	0.567	10.298	2.82	0.161	0.032
AGO2-r0-Pan_troglodytes	0.567	10.298	2.82	0.161	0.032
AGO2-r0-Pongo_abelii	0.564	10.302	2.728	0.2	0.029
AGO2-r0-Rhinopithecus_roxellana	0.567	10.294	2.826	0.156	0.031
AGO2-r0-Saimiri_boliviensis	0.568	10.297	2.813	0.156	0.031
AGO2-r0-Sapajus_apella	0.567	10.294	2.826	0.156	0.031
AGO2-r0-Symphalangus_syndactylus	0.567	10.294	2.826	0.156	0.031
AGO2-r0-Trachypithecus_francoisi	0.567	10.294	2.826	0.156	0.031
AGO2-r0-Chlorocebus_sabaeus	0.562	10.273	2.915	0.147	0.029
AGO2-r0-Macaca_fascicularis	0.562	10.273	2.915	0.147	0.029
AGO2-r1-Aotus_nancymaae	0.568	10.297	2.703	0.205	-0.051
AGO2-r1-Callithrix_jacchus	0.568	10.297	2.703	0.205	-0.051
AGO2-r1-Gorilla_gorilla_gorilla	0.568	10.297	2.703	0.205	-0.051
AGO2-r1-Homo_sapiens	0.568	10.297	2.703	0.205	-0.051
AGO2-r1-Lemur_catta	0.568	10.297	2.703	0.205	-0.051
AGO2-r1-Macaca_mulatta	0.568	10.297	2.703	0.205	-0.051
AGO2-r1-Macaca_thibetana_thibetana	0.568	10.297	2.703	0.205	-0.051
AGO2-r1-Microcebus_murinus	0.568	10.297	2.703	0.205	-0.051
AGO2-r1-Nomascus_leucogenys	0.568	10.297	2.703	0.205	-0.051
AGO2-r1-Nycticebus_coucang	0.568	10.297	2.703	0.205	-0.051
AGO2-r1-Pan_paniscus	0.568	10.297	2.703	0.205	-0.051
AGO2-r1-Pan_troglodytes	0.568	10.297	2.703	0.205	-0.051
AGO2-r1-Pongo_abelii	0.568	10.297	2.703	0.205	-0.051
AGO2-r1-Pongo_pygmaeus	0.568	10.297	2.703	0.205	-0.051
AGO2-r1-Rhinopithecus_roxellana	0.568	10.297	2.703	0.205	-0.051
AGO2-r1-Saimiri_boliviensis	0.568	10.297	2.703	0.205	-0.051
AGO2-r1-Sapajus_apella	0.568	10.297	2.703	0.205	-0.051
AGO2-r1-Symphalangus_syndactylus	0.568	10.297	2.703	0.205	-0.051
AGO2-r1-Trachypithecus_francoisi	0.568	10.297	2.703	0.205	-0.051
AGO2-r1-Carlito_syrichta	0.568	10.297	2.703	0.205	-0.051
AGO2-r1-Cebus_imitator	0.568	10.297	2.703	0.205	-0.051
AGO2-r1-Colobus_angolensis_palliatus	0.568	10.297	2.703	0.205	-0.051
AGO2-r1-Hylobates_moloch	0.568	10.297	2.703	0.205	-0.051
AGO2-r1-Macaca_nemestrina	0.568	10.297	2.703	0.205	-0.051
AGO2-r1-Mandrillus_leucophaeus	0.568	10.297	2.703	0.205	-0.051
AGO2-r1-Otolemur_garnettii	0.568	10.297	2.703	0.205	-0.051
AGO2-r1-Piliocolobus_tephrosceles	0.568	10.297	2.703	0.205	-0.051
AGO2-r1-Propithecus_coquereli	0.568	10.297	2.703	0.205	-0.051
AGO2-r1-Rhinopithecus_bieti	0.568	10.297	2.703	0.205	-0.051
AGO2-r1-Theropithecus_gelada	0.568	10.297	2.703	0.205	-0.051
AGO2-r1-Cercocebus_atys	0.56	10.295	2.686	0.275	-0.025
AGO2-r1-Papio_anubis	0.568	10.297	2.703	0.205	-0.051
AGO3-r0-Aotus_nancymaae	0.567	10.295	2.714	0.205	-0.051
AGO3-r0-Callithrix_jacchus	0.567	10.295	2.714	0.205	-0.051
AGO3-r0-Cercocebus_atys	0.567	10.295	2.714	0.205	-0.051
AGO3-r0-Colobus_angolensis_palliatus	0.567	10.295	2.714	0.205	-0.051
AGO3-r0-Gorilla_gorilla_gorilla	0.567	10.295	2.714	0.205	-0.051
AGO3-r0-Homo_sapiens	0.567	10.295	2.714	0.205	-0.051
AGO3-r0-Hylobates_moloch	0.567	10.295	2.714	0.205	-0.051
AGO3-r0-Macaca_fascicularis	0.567	10.295	2.714	0.205	-0.051
AGO3-r0-Macaca_nemestrina	0.567	10.295	2.714	0.205	-0.051
AGO3-r0-Mandrillus_leucophaeus	0.567	10.295	2.714	0.205	-0.051
AGO3-r0-Microcebus_murinus	0.567	10.295	2.714	0.205	-0.051
AGO3-r0-Propithecus_coquereli	0.567	10.295	2.714	0.205	-0.051
AGO3-r0-Theropithecus_gelada	0.567	10.295	2.714	0.205	-0.051
AGO3-r0-Rhinopithecus_roxellana	0.567	10.295	2.714	0.205	-0.051
AGO3-r0-Pongo_pygmaeus	0.567	10.295	2.714	0.205	-0.051
AGO3-r0-Pongo_abelii	0.567	10.295	2.714	0.205	-0.051
AGO3-r0-Pan_troglodytes	0.567	10.295	2.714	0.205	-0.051
AGO3-r0-Pan_paniscus	0.567	10.295	2.714	0.205	-0.051
AGO3-r0-Nomascus_leucogenys	0.567	10.295	2.714	0.205	-0.051
AGO4-r1-Macaca_nemestrina	0.576	10.312	2.647	0.179	-0.077
AGO4-r1-Otolemur_garnettii	0.576	10.312	2.647	0.179	-0.077
AGO4-r1-Callithrix_jacchus	0.576	10.312	2.647	0.179	-0.077
AGO4-r1-Carlito_syrichta	0.576	10.312	2.647	0.179	-0.077
AGO4-r1-Cebus_imitator	0.576	10.312	2.647	0.179	-0.077
AGO4-r1-Cercocebus_atys	0.576	10.312	2.647	0.179	-0.077
AGO4-r1-Chlorocebus_sabaeus	0.576	10.312	2.647	0.179	-0.077
AGO4-r1-Colobus_angolensis_palliatus	0.576	10.312	2.647	0.179	-0.077
AGO4-r1-Homo_sapiens	0.576	10.312	2.647	0.179	-0.077
AGO4-r1-Lemur_catta	0.576	10.312	2.647	0.179	-0.077
AGO4-r1-Macaca_mulatta	0.576	10.312	2.647	0.179	-0.077
AGO4-r1-Mandrillus_leucophaeus	0.576	10.312	2.647	0.179	-0.077
AGO4-r1-Microcebus_murinus	0.576	10.312	2.647	0.179	-0.077
AGO4-r1-Nomascus_leucogenys	0.576	10.312	2.647	0.179	-0.077
AGO4-r1-Nycticebus_coucang	0.576	10.312	2.647	0.179	-0.077
AGO4-r1-Papio_anubis	0.576	10.312	2.647	0.179	-0.077
AGO4-r1-Propithecus_coquereli	0.576	10.312	2.647	0.179	-0.077
AGO4-r1-Rhinopithecus_bieti	0.576	10.312	2.647	0.179	-0.077
AGO4-r1-Rhinopithecus_roxellana	0.576	10.312	2.647	0.179	-0.077
AGO4-r1-Sapajus_apella	0.576	10.312	2.647	0.179	-0.077
AGO4-r1-Symphalangus_syndactylus	0.576	10.315	2.63	0.179	-0.077
AGO4-r1-Theropithecus_gelada	0.576	10.312	2.647	0.179	-0.077
CBX1-r0-Aotus_nancymaae	0.535	10.375	2.084	0.6	0.022
CBX1-r0-Callithrix_jacchus	0.535	10.375	2.084	0.6	0.022
CBX1-r0-Carlito_syrichta	0.535	10.375	2.084	0.6	0.022
CBX1-r0-Cebus_imitator	0.535	10.375	2.084	0.6	0.022
CBX1-r0-Chlorocebus_sabaeus	0.535	10.375	2.084	0.6	0.022
CBX1-r0-Colobus_angolensis_palliatus	0.535	10.375	2.084	0.6	0.022
CBX1-r0-Gorilla_gorilla_gorilla	0.535	10.375	2.084	0.6	0.022
CBX1-r0-Homo_sapiens	0.535	10.375	2.084	0.6	0.022
CBX1-r0-Hylobates_moloch	0.535	10.375	2.084	0.6	0.022
CBX1-r0-Lemur_catta	0.535	10.375	2.084	0.6	0.022
CBX1-r0-Macaca_fascicularis	0.535	10.375	2.084	0.6	0.022
CBX1-r0-Macaca_mulatta	0.535	10.375	2.084	0.6	0.022
CBX1-r0-Macaca_nemestrina	0.535	10.375	2.084	0.6	0.022
CBX1-r0-Macaca_thibetana_thibetana	0.535	10.375	2.084	0.6	0.022
CBX1-r0-Mandrillus_leucophaeus	0.535	10.375	2.084	0.6	0.022
CBX1-r0-Nomascus_leucogenys	0.535	10.375	2.084	0.6	0.022
CBX1-r0-Nycticebus_coucang	0.535	10.375	2.084	0.6	0.022
CBX1-r0-Otolemur_garnettii	0.535	10.375	2.084	0.6	0.022
CBX1-r0-Pan_paniscus	0.535	10.375	2.084	0.6	0.022
CBX1-r0-Pan_troglodytes	0.535	10.375	2.084	0.6	0.022
CBX1-r0-Papio_anubis	0.535	10.375	2.084	0.6	0.022
CBX1-r0-Piliocolobus_tephrosceles	0.535	10.375	2.084	0.6	0.022
CBX1-r0-Pongo_abelii	0.535	10.375	2.084	0.6	0.022
CBX1-r0-Pongo_pygmaeus	0.535	10.375	2.084	0.6	0.022
CBX1-r0-Propithecus_coquereli	0.535	10.375	2.084	0.6	0.022
CBX1-r0-Rhinopithecus_bieti	0.535	10.375	2.084	0.6	0.022
CBX1-r0-Rhinopithecus_roxellana	0.535	10.375	2.084	0.6	0.022
CBX1-r0-Saimiri_boliviensis	0.535	10.375	2.084	0.6	0.022
CBX1-r0-Sapajus_apella	0.535	10.375	2.084	0.6	0.022
CBX1-r0-Symphalangus_syndactylus	0.535	10.375	2.084	0.6	0.022
CBX1-r0-Theropithecus_gelada	0.539	10.394	1.952	0.622	0.0
CBX1-r0-Trachypithecus_francoisi	0.535	10.375	2.084	0.6	0.022
CBX3-r1-Lemur_catta	0.551	10.385	2.306	0.6	0.15
CBX3-r1-Macaca_nemestrina	0.553	10.397	2.232	0.6	0.15
CBX3-r1-Microcebus_murinus	0.553	10.397	2.232	0.6	0.15
CBX3-r1-Aotus_nancymaae	0.553	10.397	2.232	0.6	0.15
CBX3-r1-Callithrix_jacchus	0.553	10.397	2.232	0.6	0.15
CBX3-r1-Carlito_syrichta	0.553	10.397	2.232	0.6	0.15
CBX3-r1-Cebus_imitator	0.553	10.397	2.232	0.6	0.15
CBX3-r1-Cercocebus_atys	0.553	10.397	2.232	0.6	0.15
CBX3-r1-Chlorocebus_sabaeus	0.553	10.397	2.232	0.6	0.15
CBX3-r1-Colobus_angolensis_palliatus	0.553	10.397	2.232	0.6	0.15
CBX3-r1-Gorilla_gorilla_gorilla	0.553	10.397	2.232	0.6	0.15
CBX3-r1-Homo_sapiens	0.553	10.397	2.232	0.6	0.15
CBX3-r1-Hylobates_moloch	0.553	10.397	2.232	0.6	0.15
CBX3-r1-Macaca_fascicularis	0.553	10.397	2.232	0.6	0.15
CBX3-r1-Macaca_mulatta	0.553	10.397	2.232	0.6	0.15
CBX3-r1-Macaca_thibetana_thibetana	0.553	10.397	2.232	0.6	0.15
CBX3-r1-Mandrillus_leucophaeus	0.553	10.397	2.232	0.6	0.15
CBX3-r1-Nomascus_leucogenys	0.553	10.397	2.232	0.6	0.15
CBX3-r1-Nycticebus_coucang	0.553	10.397	2.232	0.6	0.15
CBX3-r1-Otolemur_garnettii	0.553	10.397	2.232	0.6	0.15
CBX3-r1-Pan_paniscus	0.553	10.397	2.232	0.6	0.15
CBX3-r1-Pan_troglodytes	0.553	10.397	2.232	0.6	0.15
CBX3-r1-Papio_anubis	0.553	10.397	2.232	0.6	0.15
CBX3-r1-Piliocolobus_tephrosceles	0.553	10.397	2.232	0.6	0.15
CBX3-r1-Pongo_abelii	0.553	10.397	2.232	0.6	0.15
CBX3-r1-Pongo_pygmaeus	0.553	10.397	2.232	0.6	0.15
CBX3-r1-Propithecus_coquereli	0.553	10.397	2.232	0.6	0.15
CBX3-r1-Rhinopithecus_bieti	0.541	10.378	2.201	0.575	0.125
CBX3-r1-Rhinopithecus_roxellana	0.553	10.397	2.232	0.6	0.15
CBX3-r1-Saimiri_boliviensis	0.553	10.397	2.232	0.6	0.15
CBX3-r1-Sapajus_apella	0.553	10.397	2.232	0.6	0.15
CBX3-r1-Symphalangus_syndactylus	0.553	10.397	2.232	0.6	0.15
CBX3-r1-Theropithecus_gelada	0.553	10.397	2.232	0.6	0.15
CBX3-r1-Trachypithecus_francoisi	0.553	10.397	2.232	0.6	0.15
CDK2AP1-r0-Aotus_nancymaae	0.541	10.144	3.468	0.088	0.018
CDK2AP1-r0-Callithrix_jacchus	0.546	10.187	3.297	0.1	0.0
CDK2AP1-r0-Cercocebus_atys	0.54	10.144	3.466	0.089	0.018
CDK2AP1-r0-Chlorocebus_sabaeus	0.526	10.111	3.644	0.105	0.035
CDK2AP1-r0-Colobus_angolensis_palliatus	0.545	10.188	3.295	0.103	0.0
CDK2AP1-r0-Gorilla_gorilla_gorilla	0.546	10.187	3.297	0.1	0.0
CDK2AP1-r0-Homo_sapiens	0.541	10.144	3.468	0.088	0.018
CDK2AP1-r0-Hylobates_moloch	0.541	10.144	3.468	0.088	0.018
CDK2AP1-r0-Lemur_catta	0.541	10.143	3.467	0.086	0.017
CDK2AP1-r0-Macaca_fascicularis	0.545	10.188	3.295	0.103	0.0
CDK2AP1-r0-Macaca_mulatta	0.545	10.188	3.295	0.103	0.0
CDK2AP1-r0-Macaca_nemestrina	0.545	10.188	3.295	0.103	0.0
CDK2AP1-r0-Macaca_thibetana_thibetana	0.54	10.144	3.466	0.089	0.018
CDK2AP1-r0-Mandrillus_leucophaeus	0.545	10.188	3.295	0.103	0.0
CDK2AP1-r0-Microcebus_murinus	0.541	10.143	3.467	0.086	0.017
CDK2AP1-r0-Nomascus_leucogenys	0.546	10.187	3.297	0.1	0.0
CDK2AP1-r0-Nycticebus_coucang	0.54	10.141	3.48	0.088	0.018
CDK2AP1-r0-Otolemur_garnettii	0.546	10.187	3.297	0.1	0.0
CDK2AP1-r0-Pan_paniscus	0.541	10.144	3.468	0.088	0.018
CDK2AP1-r0-Pan_troglodytes	0.541	10.144	3.468	0.088	0.018
CDK2AP1-r0-Papio_anubis	0.545	10.188	3.295	0.103	0.0
CDK2AP1-r0-Piliocolobus_tephrosceles	0.545	10.188	3.295	0.103	0.0
CDK2AP1-r0-Pongo_abelii	0.54	10.141	3.48	0.088	0.018
CDK2AP1-r0-Pongo_pygmaeus	0.54	10.141	3.48	0.088	0.018
CDK2AP1-r0-Rhinopithecus_bieti	0.545	10.188	3.295	0.103	0.0
CDK2AP1-r0-Rhinopithecus_roxellana	0.54	10.144	3.466	0.089	0.018
CDK2AP1-r0-Saimiri_boliviensis	0.541	10.144	3.468	0.088	0.018
CDK2AP1-r0-Sapajus_apella	0.541	10.144	3.468	0.088	0.018
CDK2AP1-r0-Symphalangus_syndactylus	0.546	10.187	3.297	0.1	0.0
CDK2AP1-r0-Theropithecus_gelada	0.54	10.144	3.466	0.089	0.018
CDK2AP1-r0-Trachypithecus_francoisi	0.541	10.144	3.461	0.088	0.018
CHD3-r0-Aotus_nancymaae	0.519	10.225	3.276	0.563	0.194
CHD3-r0-Callithrix_jacchus	0.519	10.225	3.276	0.563	0.194
CHD3-r0-Carlito_syrichta	0.513	10.221	3.266	0.553	0.184
CHD3-r0-Cebus_imitator	0.519	10.225	3.276	0.563	0.194
CHD3-r0-Cercocebus_atys	0.519	10.225	3.276	0.563	0.194
CHD3-r0-Chlorocebus_sabaeus	0.519	10.225	3.276	0.563	0.194
CHD3-r0-Colobus_angolensis_palliatus	0.519	10.225	3.276	0.563	0.194
CHD3-r0-Gorilla_gorilla_gorilla	0.519	10.225	3.276	0.563	0.194
CHD3-r0-Homo_sapiens	0.519	10.225	3.276	0.563	0.194
CHD3-r0-Hylobates_moloch	0.519	10.225	3.276	0.563	0.194
CHD3-r0-Lemur_catta	0.519	10.225	3.276	0.563	0.194
CHD3-r0-Macaca_fascicularis	0.523	10.235	3.289	0.578	0.206
CHD3-r0-Macaca_mulatta	0.519	10.225	3.276	0.563	0.194
CHD3-r0-Macaca_nemestrina	0.523	10.235	3.289	0.578	0.206
CHD3-r0-Macaca_thibetana_thibetana	0.519	10.225	3.276	0.563	0.194
CHD3-r0-Mandrillus_leucophaeus	0.519	10.225	3.276	0.563	0.194
CHD3-r0-Microcebus_murinus	0.519	10.225	3.276	0.563	0.194
CHD3-r0-Nomascus_leucogenys	0.523	10.235	3.289	0.578	0.206
CHD3-r0-Nycticebus_coucang	0.52	10.228	3.252	0.563	0.194
CHD3-r0-Otolemur_garnettii	0.519	10.223	3.284	0.563	0.194
CHD3-r0-Pan_paniscus	0.519	10.225	3.276	0.563	0.194
CHD3-r0-Pan_troglodytes	0.519	10.225	3.276	0.563	0.194
CHD3-r0-Papio_anubis	0.519	10.225	3.276	0.563	0.194
CHD3-r0-Piliocolobus_tephrosceles	0.519	10.225	3.276	0.563	0.194
CHD3-r0-Pongo_abelii	0.519	10.225	3.276	0.563	0.194
CHD3-r0-Pongo_pygmaeus	0.519	10.225	3.276	0.563	0.194
CHD3-r0-Propithecus_coquereli	0.519	10.225	3.276	0.563	0.194
CHD3-r0-Rhinopithecus_bieti	0.519	10.223	3.281	0.558	0.192
CHD3-r0-Rhinopithecus_roxellana	0.519	10.225	3.276	0.563	0.194
CHD3-r0-Saimiri_boliviensis	0.519	10.225	3.276	0.563	0.194
CHD3-r0-Sapajus_apella	0.519	10.225	3.276	0.563	0.194
CHD3-r0-Symphalangus_syndactylus	0.519	10.224	3.28	0.563	0.194
CHD3-r0-Theropithecus_gelada	0.519	10.225	3.276	0.563	0.194
CHD3-r0-Trachypithecus_francoisi	0.519	10.225	3.276	0.563	0.194
CHD3-r1-Aotus_nancymaae	0.505	10.089	3.739	0.316	0.09
CHD3-r1-Callithrix_jacchus	0.505	10.09	3.733	0.316	0.09
CHD3-r1-Carlito_syrichta	0.505	10.089	3.74	0.313	0.089
CHD3-r1-Cebus_imitator	0.505	10.09	3.733	0.316	0.09
CHD3-r1-Cercocebus_atys	0.505	10.09	3.733	0.316	0.09
CHD3-r1-Chlorocebus_sabaeus	0.505	10.09	3.733	0.316	0.09
CHD3-r1-Colobus_angolensis_palliatus	0.505	10.089	3.739	0.315	0.09
CHD3-r1-Gorilla_gorilla_gorilla	0.505	10.091	3.73	0.316	0.09
CHD3-r1-Homo_sapiens	0.505	10.089	3.739	0.315	0.09
CHD3-r1-Hylobates_moloch	0.505	10.09	3.733	0.316	0.09
CHD3-r1-Lemur_catta	0.506	10.099	3.728	0.314	0.097
CHD3-r1-Macaca_fascicularis	0.505	10.089	3.743	0.313	0.089
CHD3-r1-Macaca_mulatta	0.505	10.089	3.739	0.315	0.09
CHD3-r1-Macaca_nemestrina	0.505	10.089	3.739	0.315	0.09
CHD3-r1-Macaca_thibetana_thibetana	0.505	10.09	3.733	0.316	0.09
CHD3-r1-Mandrillus_leucophaeus	0.505	10.089	3.739	0.315	0.09
CHD3-r1-Microcebus_murinus	0.506	10.097	3.74	0.312	0.097
CHD3-r1-Nomascus_leucogenys	0.505	10.089	3.743	0.313	0.089
CHD3-r1-Nycticebus_coucang	0.507	10.101	3.712	0.312	0.097
CHD3-r1-Otolemur_garnettii	0.506	10.096	3.749	0.309	0.096
CHD3-r1-Pan_paniscus	0.505	10.09	3.733	0.316	0.09
CHD3-r1-Pan_troglodytes	0.505	10.09	3.733	0.316	0.09
CHD3-r1-Papio_anubis	0.505	10.09	3.733	0.316	0.09
CHD3-r1-Piliocolobus_tephrosceles	0.505	10.09	3.733	0.316	0.09
CHD3-r1-Pongo_abelii	0.505	10.09	3.733	0.316	0.09
CHD3-r1-Pongo_pygmaeus	0.505	10.09	3.733	0.316	0.09
CHD3-r1-Propithecus_coquereli	0.506	10.096	3.746	0.312	0.097
CHD3-r1-Rhinopithecus_bieti	0.504	10.078	3.859	0.298	0.088
CHD3-r1-Rhinopithecus_roxellana	0.505	10.09	3.733	0.316	0.09
CHD3-r1-Saimiri_boliviensis	0.505	10.09	3.733	0.316	0.09
CHD3-r1-Sapajus_apella	0.505	10.09	3.733	0.316	0.09
CHD3-r1-Symphalangus_syndactylus	0.505	10.09	3.733	0.316	0.09
CHD3-r1-Theropithecus_gelada	0.505	10.09	3.733	0.316	0.09
CHD3-r1-Trachypithecus_francoisi	0.505	10.09	3.733	0.316	0.09
CHD3-r2-Aotus_nancymaae	0.53	10.373	2.191	0.382	0.088
CHD3-r2-Callithrix_jacchus	0.528	10.353	2.318	0.361	0.083
CHD3-r2-Carlito_syrichta	0.53	10.365	2.239	0.371	0.086
CHD3-r2-Cebus_imitator	0.53	10.365	2.239	0.371	0.086
CHD3-r2-Cercocebus_atys	0.53	10.365	2.239	0.371	0.086
CHD3-r2-Chlorocebus_sabaeus	0.53	10.365	2.239	0.371	0.086
CHD3-r2-Colobus_angolensis_palliatus	0.53	10.365	2.239	0.371	0.086
CHD3-r2-Gorilla_gorilla_gorilla	0.53	10.365	2.239	0.371	0.086
CHD3-r2-Homo_sapiens	0.53	10.365	2.239	0.371	0.086
CHD3-r2-Hylobates_moloch	0.53	10.365	2.239	0.371	0.086
CHD3-r2-Lemur_catta	0.53	10.365	2.239	0.371	0.086
CHD3-r2-Macaca_fascicularis	0.53	10.365	2.239	0.371	0.086
CHD3-r2-Macaca_mulatta	0.53	10.365	2.239	0.371	0.086
CHD3-r2-Macaca_nemestrina	0.53	10.365	2.239	0.371	0.086
CHD3-r2-Macaca_thibetana_thibetana	0.53	10.365	2.239	0.371	0.086
CHD3-r2-Mandrillus_leucophaeus	0.53	10.365	2.239	0.371	0.086
CHD3-r2-Microcebus_murinus	0.53	10.365	2.239	0.371	0.086
CHD3-r2-Nomascus_leucogenys	0.53	10.365	2.239	0.371	0.086
CHD3-r2-Nycticebus_coucang	0.53	10.365	2.239	0.371	0.086
CHD3-r2-Otolemur_garnettii	0.53	10.365	2.239	0.371	0.086
CHD3-r2-Pan_paniscus	0.53	10.365	2.239	0.371	0.086
CHD3-r2-Pan_troglodytes	0.53	10.365	2.239	0.371	0.086
CHD3-r2-Papio_anubis	0.53	10.365	2.239	0.371	0.086
CHD3-r2-Piliocolobus_tephrosceles	0.53	10.365	2.239	0.371	0.086
CHD3-r2-Pongo_abelii	0.53	10.365	2.239	0.371	0.086
CHD3-r2-Pongo_pygmaeus	0.53	10.365	2.239	0.371	0.086
CHD3-r2-Propithecus_coquereli	0.53	10.365	2.239	0.371	0.086
CHD3-r2-Rhinopithecus_bieti	0.53	10.365	2.239	0.371	0.086
CHD3-r2-Rhinopithecus_roxellana	0.53	10.365	2.239	0.371	0.086
CHD3-r2-Saimiri_boliviensis	0.53	10.365	2.239	0.371	0.086
CHD3-r2-Sapajus_apella	0.53	10.365	2.239	0.371	0.086
CHD3-r2-Symphalangus_syndactylus	0.53	10.365	2.239	0.371	0.086
CHD3-r2-Theropithecus_gelada	0.53	10.365	2.239	0.371	0.086
CHD3-r2-Trachypithecus_francoisi	0.53	10.365	2.239	0.371	0.086
CHD3-r3-Aotus_nancymaae	0.432	10.244	2.681	0.5	-0.048
CHD3-r3-Callithrix_jacchus	0.432	10.244	2.681	0.5	-0.048
CHD3-r3-Carlito_syrichta	0.428	10.247	2.667	0.508	-0.049
CHD3-r3-Cebus_imitator	0.432	10.244	2.681	0.5	-0.048
CHD3-r3-Cercocebus_atys	0.432	10.244	2.681	0.5	-0.048
CHD3-r3-Chlorocebus_sabaeus	0.432	10.244	2.681	0.5	-0.048
CHD3-r3-Colobus_angolensis_palliatus	0.432	10.244	2.681	0.5	-0.048
CHD3-r3-Gorilla_gorilla_gorilla	0.432	10.244	2.681	0.5	-0.048
CHD3-r3-Homo_sapiens	0.432	10.244	2.681	0.5	-0.048
CHD3-r3-Hylobates_moloch	0.432	10.244	2.681	0.5	-0.048
CHD3-r3-Lemur_catta	0.432	10.244	2.681	0.5	-0.048
CHD3-r3-Macaca_fascicularis	0.432	10.244	2.681	0.5	-0.048
CHD3-r3-Macaca_mulatta	0.432	10.244	2.681	0.5	-0.048
CHD3-r3-Macaca_nemestrina	0.432	10.244	2.681	0.5	-0.048
CHD3-r3-Macaca_thibetana_thibetana	0.432	10.244	2.681	0.5	-0.048
CHD3-r3-Mandrillus_leucophaeus	0.432	10.244	2.681	0.5	-0.048
CHD3-r3-Microcebus_murinus	0.432	10.244	2.681	0.5	-0.048
CHD3-r3-Nomascus_leucogenys	0.432	10.244	2.681	0.5	-0.048
CHD3-r3-Nycticebus_coucang	0.432	10.244	2.681	0.5	-0.048
CHD3-r3-Otolemur_garnettii	0.432	10.244	2.681	0.5	-0.048
CHD3-r3-Pan_paniscus	0.432	10.244	2.681	0.5	-0.048
CHD3-r3-Pan_troglodytes	0.432	10.244	2.681	0.5	-0.048
CHD3-r3-Papio_anubis	0.435	10.242	2.693	0.492	-0.048
CHD3-r3-Piliocolobus_tephrosceles	0.432	10.244	2.681	0.5	-0.048
CHD3-r3-Pongo_abelii	0.432	10.244	2.681	0.5	-0.048
CHD3-r3-Pongo_pygmaeus	0.432	10.244	2.681	0.5	-0.048
CHD3-r3-Propithecus_coquereli	0.432	10.244	2.681	0.5	-0.048
CHD3-r3-Rhinopithecus_bieti	0.432	10.244	2.681	0.5	-0.048
CHD3-r3-Rhinopithecus_roxellana	0.432	10.244	2.681	0.5	-0.048
CHD3-r3-Saimiri_boliviensis	0.432	10.244	2.681	0.5	-0.048
CHD3-r3-Sapajus_apella	0.432	10.244	2.681	0.5	-0.048
CHD3-r3-Symphalangus_syndactylus	0.432	10.244	2.681	0.5	-0.048
CHD3-r3-Theropithecus_gelada	0.432	10.244	2.681	0.5	-0.048
CHD3-r3-Trachypithecus_francoisi	0.432	10.244	2.681	0.5	-0.048
CHD3-r4-Aotus_nancymaae	0.525	10.127	3.455	0.41	-0.062
CHD3-r4-Callithrix_jacchus	0.517	10.083	3.745	0.394	-0.046
CHD3-r4-Carlito_syrichta	0.526	10.133	3.407	0.408	-0.061
CHD3-r4-Cebus_imitator	0.517	10.086	3.726	0.39	-0.05
CHD3-r4-Cercocebus_atys	0.516	10.081	3.762	0.394	-0.046
CHD3-r4-Chlorocebus_sabaeus	0.516	10.08	3.766	0.394	-0.046
CHD3-r4-Colobus_angolensis_palliatus	0.523	10.12	3.511	0.41	-0.062
CHD3-r4-Gorilla_gorilla_gorilla	0.517	10.083	3.745	0.394	-0.046
CHD3-r4-Homo_sapiens	0.524	10.125	3.472	0.41	-0.062
CHD3-r4-Hylobates_moloch	0.516	10.079	3.772	0.394	-0.046
CHD3-r4-Lemur_catta	0.517	10.082	3.754	0.393	-0.045
CHD3-r4-Macaca_fascicularis	0.516	10.081	3.762	0.394	-0.046
CHD3-r4-Macaca_mulatta	0.524	10.124	3.475	0.41	-0.062
CHD3-r4-Macaca_nemestrina	0.517	10.084	3.748	0.39	-0.05
CHD3-r4-Macaca_thibetana_thibetana	0.516	10.081	3.762	0.394	-0.046
CHD3-r4-Mandrillus_leucophaeus	0.524	10.124	3.475	0.41	-0.062
CHD3-r4-Microcebus_murinus	0.519	10.089	3.71	0.385	-0.05
CHD3-r4-Nomascus_leucogenys	0.516	10.079	3.773	0.394	-0.046
CHD3-r4-Nycticebus_coucang	0.517	10.083	3.736	0.397	-0.041
CHD3-r4-Otolemur_garnettii	0.526	10.13	3.43	0.408	-0.061
CHD3-r4-Pan_paniscus	0.516	10.081	3.759	0.394	-0.046
CHD3-r4-Pan_troglodytes	0.516	10.081	3.759	0.394	-0.046
CHD3-r4-Papio_anubis	0.516	10.078	3.786	0.389	-0.045
CHD3-r4-Piliocolobus_tephrosceles	0.516	10.08	3.766	0.394	-0.046
CHD3-r4-Pongo_abelii	0.516	10.081	3.758	0.394	-0.046
CHD3-r4-Pongo_pygmaeus	0.516	10.081	3.758	0.394	-0.046
CHD3-r4-Propithecus_coquereli	0.526	10.131	3.422	0.408	-0.061
CHD3-r4-Rhinopithecus_bieti	0.524	10.124	3.48	0.41	-0.062
CHD3-r4-Rhinopithecus_roxellana	0.516	10.08	3.766	0.394	-0.046
CHD3-r4-Saimiri_boliviensis	0.517	10.083	3.742	0.396	-0.046
CHD3-r4-Sapajus_apella	0.517	10.083	3.739	0.394	-0.046
CHD3-r4-Symphalangus_syndactylus	0.516	10.079	3.772	0.394	-0.046
CHD3-r4-Theropithecus_gelada	0.524	10.124	3.475	0.41	-0.062
CHD3-r4-Trachypithecus_francoisi	0.516	10.08	3.766	0.394	-0.046
CHD3-r5-Callithrix_jacchus	0.51	9.977	4.713	0.208	0.085
CHD3-r5-Cebus_imitator	0.517	9.983	4.747	0.222	0.099
CHD3-r5-Cercocebus_atys	0.518	9.987	4.718	0.222	0.099
CHD3-r5-Chlorocebus_sabaeus	0.518	9.987	4.719	0.222	0.099
CHD3-r5-Gorilla_gorilla_gorilla	0.517	9.985	4.734	0.222	0.099
CHD3-r5-Hylobates_moloch	0.515	9.977	4.727	0.212	0.09
CHD3-r5-Lemur_catta	0.52	9.988	4.688	0.217	0.094
CHD3-r5-Macaca_fascicularis	0.518	9.987	4.718	0.222	0.099
CHD3-r5-Macaca_nemestrina	0.518	9.987	4.718	0.222	0.099
CHD3-r5-Macaca_thibetana_thibetana	0.518	9.987	4.718	0.222	0.099
CHD3-r5-Microcebus_murinus	0.519	9.986	4.698	0.217	0.094
CHD3-r5-Nomascus_leucogenys	0.516	9.981	4.73	0.217	0.094
CHD3-r5-Nycticebus_coucang	0.524	9.992	4.722	0.226	0.104
CHD3-r5-Pan_paniscus	0.518	9.988	4.711	0.222	0.099
CHD3-r5-Pan_troglodytes	0.518	9.99	4.695	0.222	0.099
CHD3-r5-Piliocolobus_tephrosceles	0.518	9.987	4.718	0.222	0.099
CHD3-r5-Pongo_abelii	0.518	9.989	4.702	0.222	0.099
CHD3-r5-Pongo_pygmaeus	0.518	9.989	4.703	0.222	0.099
CHD3-r5-Rhinopithecus_roxellana	0.518	9.986	4.722	0.222	0.099
CHD3-r5-Saimiri_boliviensis	0.518	9.986	4.726	0.222	0.099
CHD3-r5-Sapajus_apella	0.517	9.985	4.735	0.222	0.099
CHD3-r5-Symphalangus_syndactylus	0.516	9.981	4.73	0.217	0.094
CHD3-r5-Trachypithecus_francoisi	0.518	9.988	4.71	0.222	0.099
CHD4-r0-Aotus_nancymaae	0.457	10.175	2.958	0.494	-0.051
CHD4-r0-Callithrix_jacchus	0.457	10.175	2.958	0.494	-0.051
CHD4-r0-Carlito_syrichta	0.462	10.233	2.543	0.586	-0.06
CHD4-r0-Cebus_imitator	0.457	10.175	2.958	0.494	-0.051
CHD4-r0-Cercocebus_atys	0.457	10.175	2.958	0.494	-0.051
CHD4-r0-Chlorocebus_sabaeus	0.457	10.175	2.958	0.494	-0.051
CHD4-r0-Colobus_angolensis_palliatus	0.457	10.175	2.958	0.494	-0.051
CHD4-r0-Gorilla_gorilla_gorilla	0.457	10.175	2.958	0.494	-0.051
CHD4-r0-Homo_sapiens	0.457	10.175	2.956	0.494	-0.051
CHD4-r0-Hylobates_moloch	0.49	10.203	2.799	0.503	-0.066
CHD4-r0-Lemur_catta	0.457	10.176	2.952	0.494	-0.051
CHD4-r0-Macaca_fascicularis	0.457	10.175	2.958	0.494	-0.051
CHD4-r0-Macaca_mulatta	0.457	10.175	2.958	0.494	-0.051
CHD4-r0-Macaca_nemestrina	0.49	10.203	2.799	0.503	-0.066
CHD4-r0-Macaca_thibetana_thibetana	0.457	10.175	2.958	0.494	-0.051
CHD4-r0-Mandrillus_leucophaeus	0.49	10.203	2.799	0.503	-0.066
CHD4-r0-Microcebus_murinus	0.457	10.176	2.952	0.494	-0.051
CHD4-r0-Nomascus_leucogenys	0.457	10.175	2.958	0.494	-0.051
CHD4-r0-Nycticebus_coucang	0.457	10.176	2.952	0.494	-0.051
CHD4-r0-Otolemur_garnettii	0.457	10.175	2.955	0.494	-0.051
CHD4-r0-Pan_paniscus	0.457	10.175	2.958	0.494	-0.051
CHD4-r0-Pan_troglodytes	0.457	10.175	2.958	0.494	-0.051
CHD4-r0-Papio_anubis	0.457	10.175	2.958	0.494	-0.051
CHD4-r0-Piliocolobus_tephrosceles	0.457	10.175	2.958	0.494	-0.051
CHD4-r0-Pongo_abelii	0.457	10.175	2.958	0.494	-0.051
CHD4-r0-Pongo_pygmaeus	0.457	10.175	2.958	0.494	-0.051
CHD4-r0-Propithecus_coquereli	0.457	10.176	2.952	0.494	-0.051
CHD4-r0-Rhinopithecus_bieti	0.457	10.175	2.958	0.494	-0.051
CHD4-r0-Rhinopithecus_roxellana	0.457	10.175	2.958	0.494	-0.051
CHD4-r0-Saimiri_boliviensis	0.457	10.175	2.956	0.494	-0.051
CHD4-r0-Sapajus_apella	0.457	10.174	2.965	0.494	-0.051
CHD4-r0-Symphalangus_syndactylus	0.457	10.175	2.958	0.494	-0.051
CHD4-r0-Theropithecus_gelada	0.457	10.175	2.955	0.494	-0.051
CHD4-r0-Trachypithecus_francoisi	0.457	10.175	2.96	0.494	-0.051
CHD4-r1-Aotus_nancymaae	0.508	10.139	3.316	0.359	0.077
CHD4-r1-Callithrix_jacchus	0.508	10.139	3.316	0.359	0.077
CHD4-r1-Carlito_syrichta	0.507	10.139	3.32	0.359	0.077
CHD4-r1-Cebus_imitator	0.508	10.139	3.316	0.359	0.077
CHD4-r1-Cercocebus_atys	0.508	10.139	3.316	0.359	0.077
CHD4-r1-Chlorocebus_sabaeus	0.508	10.139	3.316	0.359	0.077
CHD4-r1-Colobus_angolensis_palliatus	0.508	10.139	3.316	0.359	0.077
CHD4-r1-Gorilla_gorilla_gorilla	0.508	10.139	3.316	0.359	0.077
CHD4-r1-Homo_sapiens	0.508	10.139	3.316	0.359	0.077
CHD4-r1-Hylobates_moloch	0.508	10.139	3.316	0.359	0.077
CHD4-r1-Lemur_catta	0.508	10.139	3.316	0.359	0.077
CHD4-r1-Macaca_fascicularis	0.508	10.139	3.316	0.359	0.077
CHD4-r1-Macaca_mulatta	0.508	10.139	3.316	0.359	0.077
CHD4-r1-Macaca_nemestrina	0.507	10.14	3.309	0.361	0.077
CHD4-r1-Macaca_thibetana_thibetana	0.508	10.139	3.316	0.359	0.077
CHD4-r1-Mandrillus_leucophaeus	0.508	10.139	3.316	0.359	0.077
CHD4-r1-Microcebus_murinus	0.508	10.139	3.316	0.359	0.077
CHD4-r1-Nomascus_leucogenys	0.508	10.139	3.316	0.359	0.077
CHD4-r1-Nycticebus_coucang	0.507	10.139	3.321	0.359	0.077
CHD4-r1-Otolemur_garnettii	0.508	10.139	3.316	0.359	0.077
CHD4-r1-Pan_paniscus	0.508	10.139	3.316	0.359	0.077
CHD4-r1-Pan_troglodytes	0.508	10.139	3.316	0.359	0.077
CHD4-r1-Papio_anubis	0.508	10.139	3.316	0.359	0.077
CHD4-r1-Piliocolobus_tephrosceles	0.508	10.139	3.316	0.359	0.077
CHD4-r1-Pongo_abelii	0.508	10.139	3.316	0.359	0.077
CHD4-r1-Pongo_pygmaeus	0.508	10.139	3.316	0.359	0.077
CHD4-r1-Propithecus_coquereli	0.508	10.139	3.316	0.359	0.077
CHD4-r1-Rhinopithecus_bieti	0.508	10.139	3.316	0.359	0.077
CHD4-r1-Rhinopithecus_roxellana	0.508	10.139	3.316	0.359	0.077
CHD4-r1-Saimiri_boliviensis	0.508	10.139	3.316	0.359	0.077
CHD4-r1-Sapajus_apella	0.508	10.139	3.316	0.359	0.077
CHD4-r1-Symphalangus_syndactylus	0.507	10.137	3.337	0.359	0.077
CHD4-r1-Theropithecus_gelada	0.508	10.139	3.316	0.359	0.077
CHD4-r1-Trachypithecus_francoisi	0.508	10.139	3.316	0.359	0.077
CHD4-r2-Aotus_nancymaae	0.563	10.332	2.707	0.456	-0.191
CHD4-r2-Callithrix_jacchus	0.563	10.332	2.707	0.456	-0.191
CHD4-r2-Carlito_syrichta	0.598	10.472	2.274	0.478	-0.261
CHD4-r2-Cebus_imitator	0.563	10.332	2.707	0.456	-0.191
CHD4-r2-Cercocebus_atys	0.598	10.472	2.274	0.478	-0.261
CHD4-r2-Chlorocebus_sabaeus	0.563	10.332	2.707	0.456	-0.191
CHD4-r2-Colobus_angolensis_palliatus	0.6	10.476	2.24	0.489	-0.267
CHD4-r2-Gorilla_gorilla_gorilla	0.563	10.332	2.707	0.456	-0.191
CHD4-r2-Homo_sapiens	0.598	10.472	2.274	0.478	-0.261
CHD4-r2-Hylobates_moloch	0.563	10.332	2.707	0.456	-0.191
CHD4-r2-Lemur_catta	0.563	10.332	2.707	0.456	-0.191
CHD4-r2-Macaca_fascicularis	0.563	10.332	2.707	0.456	-0.191
CHD4-r2-Macaca_mulatta	0.563	10.332	2.707	0.456	-0.191
CHD4-r2-Macaca_nemestrina	0.598	10.472	2.274	0.478	-0.261
CHD4-r2-Macaca_thibetana_thibetana	0.563	10.332	2.707	0.456	-0.191
CHD4-r2-Mandrillus_leucophaeus	0.598	10.472	2.274	0.478	-0.261
CHD4-r2-Microcebus_murinus	0.563	10.332	2.707	0.456	-0.191
CHD4-r2-Nomascus_leucogenys	0.563	10.332	2.707	0.456	-0.191
CHD4-r2-Nycticebus_coucang	0.562	10.328	2.729	0.456	-0.191
CHD4-r2-Otolemur_garnettii	0.562	10.324	2.741	0.449	-0.188
CHD4-r2-Pan_paniscus	0.563	10.332	2.707	0.456	-0.191
CHD4-r2-Pan_troglodytes	0.563	10.332	2.707	0.456	-0.191
CHD4-r2-Papio_anubis	0.598	10.472	2.274	0.478	-0.261
CHD4-r2-Piliocolobus_tephrosceles	0.563	10.332	2.707	0.456	-0.191
CHD4-r2-Pongo_abelii	0.563	10.332	2.707	0.456	-0.191
CHD4-r2-Pongo_pygmaeus	0.563	10.332	2.707	0.456	-0.191
CHD4-r2-Propithecus_coquereli	0.563	10.332	2.707	0.456	-0.191
CHD4-r2-Rhinopithecus_bieti	0.563	10.332	2.707	0.456	-0.191
CHD4-r2-Rhinopithecus_roxellana	0.563	10.332	2.707	0.456	-0.191
CHD4-r2-Saimiri_boliviensis	0.563	10.332	2.707	0.456	-0.191
CHD4-r2-Sapajus_apella	0.563	10.332	2.707	0.456	-0.191
CHD4-r2-Symphalangus_syndactylus	0.598	10.472	2.274	0.478	-0.261
CHD4-r2-Theropithecus_gelada	0.563	10.332	2.707	0.456	-0.191
CHD4-r2-Trachypithecus_francoisi	0.563	10.332	2.707	0.456	-0.191
CHD4-r3-Aotus_nancymaae	0.436	10.128	3.414	0.396	0.0
CHD4-r3-Callithrix_jacchus	0.436	10.128	3.414	0.396	0.0
CHD4-r3-Carlito_syrichta	0.448	10.21	2.905	0.493	-0.058
CHD4-r3-Cebus_imitator	0.436	10.128	3.414	0.396	0.0
CHD4-r3-Cercocebus_atys	0.448	10.21	2.905	0.493	-0.058
CHD4-r3-Chlorocebus_sabaeus	0.436	10.128	3.414	0.396	0.0
CHD4-r3-Colobus_angolensis_palliatus	0.448	10.21	2.905	0.493	-0.058
CHD4-r3-Gorilla_gorilla_gorilla	0.436	10.128	3.414	0.396	0.0
CHD4-r3-Homo_sapiens	0.448	10.21	2.905	0.493	-0.058
CHD4-r3-Hylobates_moloch	0.448	10.21	2.905	0.493	-0.058
CHD4-r3-Lemur_catta	0.436	10.128	3.414	0.396	0.0
CHD4-r3-Macaca_fascicularis	0.436	10.128	3.414	0.396	0.0
CHD4-r3-Macaca_mulatta	0.436	10.128	3.414	0.396	0.0
CHD4-r3-Macaca_nemestrina	0.45	10.208	2.914	0.486	-0.057
CHD4-r3-Macaca_thibetana_thibetana	0.436	10.128	3.414	0.396	0.0
CHD4-r3-Mandrillus_leucophaeus	0.448	10.21	2.905	0.493	-0.058
CHD4-r3-Microcebus_murinus	0.436	10.128	3.414	0.396	0.0
CHD4-r3-Nomascus_leucogenys	0.436	10.128	3.414	0.396	0.0
CHD4-r3-Nycticebus_coucang	0.436	10.128	3.414	0.396	0.0
CHD4-r3-Otolemur_garnettii	0.436	10.128	3.414	0.396	0.0
CHD4-r3-Pan_paniscus	0.436	10.128	3.414	0.396	0.0
CHD4-r3-Pan_troglodytes	0.436	10.128	3.414	0.396	0.0
CHD4-r3-Papio_anubis	0.448	10.21	2.905	0.493	-0.058
CHD4-r3-Piliocolobus_tephrosceles	0.436	10.128	3.414	0.396	0.0
CHD4-r3-Pongo_abelii	0.436	10.128	3.414	0.396	0.0
CHD4-r3-Pongo_pygmaeus	0.436	10.128	3.414	0.396	0.0
CHD4-r3-Propithecus_coquereli	0.436	10.128	3.414	0.396	0.0
CHD4-r3-Rhinopithecus_bieti	0.448	10.21	2.905	0.493	-0.058
CHD4-r3-Rhinopithecus_roxellana	0.436	10.128	3.414	0.396	0.0
CHD4-r3-Saimiri_boliviensis	0.436	10.128	3.414	0.396	0.0
CHD4-r3-Sapajus_apella	0.436	10.128	3.414	0.396	0.0
CHD4-r3-Symphalangus_syndactylus	0.448	10.21	2.905	0.493	-0.058
CHD4-r3-Theropithecus_gelada	0.436	10.128	3.414	0.396	0.0
CHD4-r3-Trachypithecus_francoisi	0.436	10.128	3.414	0.396	0.0
CHD4-r4-Aotus_nancymaae	0.593	10.324	2.542	0.42	-0.136
CHD4-r4-Callithrix_jacchus	0.593	10.324	2.542	0.42	-0.136
CHD4-r4-Carlito_syrichta	0.588	10.369	2.525	0.416	-0.15
CHD4-r4-Cebus_imitator	0.592	10.323	2.544	0.42	-0.136
CHD4-r4-Cercocebus_atys	0.592	10.32	2.562	0.42	-0.136
CHD4-r4-Chlorocebus_sabaeus	0.592	10.319	2.563	0.416	-0.135
CHD4-r4-Colobus_angolensis_palliatus	0.591	10.318	2.571	0.42	-0.136
CHD4-r4-Gorilla_gorilla_gorilla	0.592	10.322	2.549	0.42	-0.136
CHD4-r4-Homo_sapiens	0.592	10.323	2.548	0.42	-0.136
CHD4-r4-Hylobates_moloch	0.592	10.324	2.543	0.42	-0.136
CHD4-r4-Lemur_catta	0.592	10.32	2.56	0.42	-0.136
CHD4-r4-Macaca_fascicularis	0.592	10.322	2.551	0.42	-0.136
CHD4-r4-Macaca_mulatta	0.592	10.322	2.551	0.42	-0.136
CHD4-r4-Macaca_nemestrina	0.591	10.361	2.48	0.424	-0.145
CHD4-r4-Macaca_thibetana_thibetana	0.592	10.322	2.551	0.42	-0.136
CHD4-r4-Mandrillus_leucophaeus	0.592	10.322	2.551	0.42	-0.136
CHD4-r4-Microcebus_murinus	0.593	10.326	2.532	0.42	-0.136
CHD4-r4-Nomascus_leucogenys	0.592	10.324	2.543	0.42	-0.136
CHD4-r4-Nycticebus_coucang	0.592	10.322	2.552	0.42	-0.136
CHD4-r4-Otolemur_garnettii	0.592	10.321	2.556	0.42	-0.136
CHD4-r4-Pan_paniscus	0.592	10.323	2.548	0.42	-0.136
CHD4-r4-Pan_troglodytes	0.592	10.323	2.548	0.42	-0.136
CHD4-r4-Papio_anubis	0.592	10.32	2.561	0.42	-0.136
CHD4-r4-Piliocolobus_tephrosceles	0.592	10.321	2.554	0.42	-0.136
CHD4-r4-Pongo_abelii	0.592	10.32	2.559	0.42	-0.136
CHD4-r4-Pongo_pygmaeus	0.592	10.32	2.559	0.42	-0.136
CHD4-r4-Propithecus_coquereli	0.593	10.326	2.532	0.42	-0.136
CHD4-r4-Rhinopithecus_bieti	0.59	10.316	2.578	0.427	-0.135
CHD4-r4-Rhinopithecus_roxellana	0.592	10.323	2.548	0.42	-0.136
CHD4-r4-Saimiri_boliviensis	0.592	10.323	2.544	0.42	-0.136
CHD4-r4-Sapajus_apella	0.593	10.324	2.542	0.42	-0.136
CHD4-r4-Symphalangus_syndactylus	0.589	10.31	2.568	0.421	-0.129
CHD4-r4-Theropithecus_gelada	0.592	10.322	2.551	0.42	-0.136
CHD4-r4-Trachypithecus_francoisi	0.592	10.323	2.548	0.42	-0.136
CHD5-r0-Aotus_nancymaae	0.507	10.128	3.584	0.351	0.113
CHD5-r0-Callithrix_jacchus	0.508	10.13	3.572	0.353	0.113
CHD5-r0-Carlito_syrichta	0.501	10.122	3.674	0.361	0.12
CHD5-r0-Cebus_imitator	0.509	10.137	3.53	0.356	0.114
CHD5-r0-Cercocebus_atys	0.509	10.137	3.526	0.356	0.114
CHD5-r0-Chlorocebus_sabaeus	0.509	10.137	3.526	0.356	0.114
CHD5-r0-Colobus_angolensis_palliatus	0.509	10.137	3.526	0.356	0.114
CHD5-r0-Gorilla_gorilla_gorilla	0.51	10.142	3.497	0.356	0.114
CHD5-r0-Homo_sapiens	0.51	10.142	3.497	0.356	0.114
CHD5-r0-Hylobates_moloch	0.507	10.148	3.503	0.371	0.119
CHD5-r0-Lemur_catta	0.506	10.147	3.511	0.373	0.12
CHD5-r0-Macaca_fascicularis	0.509	10.137	3.526	0.356	0.114
CHD5-r0-Macaca_mulatta	0.509	10.137	3.526	0.356	0.114
CHD5-r0-Macaca_nemestrina	0.509	10.137	3.526	0.356	0.114
CHD5-r0-Macaca_thibetana_thibetana	0.509	10.137	3.526	0.356	0.114
CHD5-r0-Mandrillus_leucophaeus	0.509	10.138	3.519	0.356	0.114
CHD5-r0-Microcebus_murinus	0.508	10.15	3.499	0.365	0.122
CHD5-r0-Nomascus_leucogenys	0.509	10.14	3.507	0.356	0.114
CHD5-r0-Nycticebus_coucang	0.507	10.146	3.526	0.365	0.122
CHD5-r0-Otolemur_garnettii	0.509	10.138	3.521	0.356	0.114
CHD5-r0-Pan_paniscus	0.507	10.145	3.498	0.362	0.121
CHD5-r0-Pan_troglodytes	0.51	10.142	3.497	0.356	0.114
CHD5-r0-Papio_anubis	0.509	10.137	3.526	0.356	0.114
CHD5-r0-Piliocolobus_tephrosceles	0.509	10.137	3.526	0.356	0.114
CHD5-r0-Pongo_abelii	0.51	10.143	3.488	0.356	0.114
CHD5-r0-Pongo_pygmaeus	0.509	10.14	3.509	0.356	0.114
CHD5-r0-Propithecus_coquereli	0.51	10.142	3.494	0.356	0.114
CHD5-r0-Rhinopithecus_bieti	0.507	10.144	3.537	0.362	0.121
CHD5-r0-Rhinopithecus_roxellana	0.504	10.142	3.579	0.373	0.124
CHD5-r0-Saimiri_boliviensis	0.508	10.131	3.56	0.351	0.113
CHD5-r0-Sapajus_apella	0.508	10.133	3.544	0.351	0.113
CHD5-r0-Symphalangus_syndactylus	0.509	10.14	3.509	0.356	0.114
CHD5-r0-Theropithecus_gelada	0.509	10.137	3.526	0.356	0.114
CHD5-r0-Trachypithecus_francoisi	0.509	10.138	3.522	0.356	0.114
CHD5-r1-Aotus_nancymaae	0.425	10.207	2.912	0.493	-0.087
CHD5-r1-Callithrix_jacchus	0.426	10.198	2.979	0.479	-0.085
CHD5-r1-Carlito_syrichta	0.527	10.176	3.554	0.432	-0.148
CHD5-r1-Cebus_imitator	0.425	10.203	2.946	0.486	-0.086
CHD5-r1-Cercocebus_atys	0.425	10.203	2.946	0.486	-0.086
CHD5-r1-Chlorocebus_sabaeus	0.425	10.203	2.946	0.486	-0.086
CHD5-r1-Colobus_angolensis_palliatus	0.425	10.203	2.946	0.486	-0.086
CHD5-r1-Gorilla_gorilla_gorilla	0.425	10.203	2.946	0.486	-0.086
CHD5-r1-Homo_sapiens	0.425	10.203	2.946	0.486	-0.086
CHD5-r1-Hylobates_moloch	0.425	10.203	2.946	0.486	-0.086
CHD5-r1-Lemur_catta	0.425	10.203	2.946	0.486	-0.086
CHD5-r1-Macaca_fascicularis	0.425	10.203	2.946	0.486	-0.086
CHD5-r1-Macaca_mulatta	0.425	10.203	2.946	0.486	-0.086
CHD5-r1-Macaca_nemestrina	0.425	10.203	2.946	0.486	-0.086
CHD5-r1-Macaca_thibetana_thibetana	0.425	10.203	2.946	0.486	-0.086
CHD5-r1-Mandrillus_leucophaeus	0.425	10.207	2.912	0.493	-0.087
CHD5-r1-Microcebus_murinus	0.428	10.205	2.923	0.486	-0.086
CHD5-r1-Nomascus_leucogenys	0.425	10.203	2.946	0.486	-0.086
CHD5-r1-Nycticebus_coucang	0.425	10.203	2.946	0.486	-0.086
CHD5-r1-Otolemur_garnettii	0.425	10.203	2.946	0.486	-0.086
CHD5-r1-Pan_paniscus	0.425	10.203	2.946	0.486	-0.086
CHD5-r1-Pan_troglodytes	0.425	10.203	2.946	0.486	-0.086
CHD5-r1-Papio_anubis	0.425	10.203	2.946	0.486	-0.086
CHD5-r1-Piliocolobus_tephrosceles	0.424	10.199	2.973	0.486	-0.086
CHD5-r1-Pongo_abelii	0.425	10.203	2.946	0.486	-0.086
CHD5-r1-Pongo_pygmaeus	0.425	10.203	2.946	0.486	-0.086
CHD5-r1-Propithecus_coquereli	0.425	10.203	2.946	0.486	-0.086
CHD5-r1-Rhinopithecus_bieti	0.425	10.203	2.946	0.486	-0.086
CHD5-r1-Rhinopithecus_roxellana	0.425	10.203	2.946	0.486	-0.086
CHD5-r1-Saimiri_boliviensis	0.425	10.203	2.946	0.486	-0.086
CHD5-r1-Sapajus_apella	0.425	10.203	2.946	0.486	-0.086
CHD5-r1-Symphalangus_syndactylus	0.425	10.202	2.95	0.486	-0.086
CHD5-r1-Theropithecus_gelada	0.425	10.203	2.946	0.486	-0.086
CHD5-r1-Trachypithecus_francoisi	0.425	10.203	2.946	0.486	-0.086
CHD5-r2-Aotus_nancymaae	0.551	10.213	3.057	0.431	-0.098
CHD5-r2-Callithrix_jacchus	0.545	10.192	3.178	0.414	-0.094
CHD5-r2-Carlito_syrichta	0.54	10.182	3.233	0.414	-0.094
CHD5-r2-Cebus_imitator	0.536	10.183	3.199	0.414	-0.083
CHD5-r2-Cercocebus_atys	0.544	10.198	3.137	0.417	-0.094
CHD5-r2-Chlorocebus_sabaeus	0.544	10.197	3.143	0.414	-0.094
CHD5-r2-Colobus_angolensis_palliatus	0.544	10.197	3.15	0.419	-0.095
CHD5-r2-Gorilla_gorilla_gorilla	0.55	10.192	3.188	0.411	-0.1
CHD5-r2-Homo_sapiens	0.55	10.194	3.173	0.411	-0.1
CHD5-r2-Hylobates_moloch	0.55	10.192	3.189	0.411	-0.1
CHD5-r2-Lemur_catta	0.547	10.197	3.146	0.392	-0.094
CHD5-r2-Macaca_fascicularis	0.544	10.198	3.137	0.417	-0.094
CHD5-r2-Macaca_mulatta	0.543	10.196	3.151	0.414	-0.094
CHD5-r2-Macaca_nemestrina	0.544	10.197	3.146	0.417	-0.094
CHD5-r2-Macaca_thibetana_thibetana	0.544	10.198	3.137	0.417	-0.094
CHD5-r2-Mandrillus_leucophaeus	0.544	10.196	3.154	0.419	-0.095
CHD5-r2-Microcebus_murinus	0.539	10.184	3.125	0.272	-0.025
CHD5-r2-Nomascus_leucogenys	0.55	10.189	3.204	0.411	-0.1
CHD5-r2-Nycticebus_coucang	0.553	10.192	3.188	0.392	-0.105
CHD5-r2-Otolemur_garnettii	0.552	10.199	3.155	0.409	-0.102
CHD5-r2-Pan_paniscus	0.551	10.196	3.165	0.413	-0.101
CHD5-r2-Pan_troglodytes	0.551	10.196	3.165	0.413	-0.101
CHD5-r2-Papio_anubis	0.528	10.143	3.429	0.395	-0.077
CHD5-r2-Piliocolobus_tephrosceles	0.544	10.197	3.14	0.417	-0.094
CHD5-r2-Pongo_abelii	0.55	10.191	3.193	0.411	-0.1
CHD5-r2-Pongo_pygmaeus	0.55	10.191	3.196	0.411	-0.1
CHD5-r2-Propithecus_coquereli	0.548	10.2	3.127	0.392	-0.094
CHD5-r2-Rhinopithecus_bieti	0.539	10.19	3.174	0.42	-0.088
CHD5-r2-Rhinopithecus_roxellana	0.539	10.189	3.178	0.42	-0.088
CHD5-r2-Saimiri_boliviensis	0.539	10.191	3.166	0.411	-0.089
CHD5-r2-Sapajus_apella	0.539	10.185	3.203	0.409	-0.088
CHD5-r2-Symphalangus_syndactylus	0.55	10.19	3.203	0.413	-0.101
CHD5-r2-Theropithecus_gelada	0.544	10.198	3.139	0.417	-0.094
CHD5-r2-Trachypithecus_francoisi	0.539	10.19	3.173	0.42	-0.088
CHD5-r3-Aotus_nancymaae	0.419	10.204	2.714	0.564	-0.05
CHD5-r3-Callithrix_jacchus	0.416	10.191	2.823	0.564	-0.05
CHD5-r3-Carlito_syrichta	0.423	10.266	2.343	0.625	0.083
CHD5-r3-Cebus_imitator	0.419	10.204	2.714	0.564	-0.05
CHD5-r3-Cercocebus_atys	0.431	10.194	2.85	0.521	-0.058
CHD5-r3-Chlorocebus_sabaeus	0.418	10.2	2.743	0.564	-0.05
CHD5-r3-Colobus_angolensis_palliatus	0.428	10.184	2.909	0.519	0.008
CHD5-r3-Gorilla_gorilla_gorilla	0.42	10.206	2.69	0.564	-0.05
CHD5-r3-Homo_sapiens	0.42	10.206	2.69	0.564	-0.05
CHD5-r3-Hylobates_moloch	0.419	10.204	2.714	0.564	-0.05
CHD5-r3-Lemur_catta	0.48	10.26	2.462	0.538	-0.055
CHD5-r3-Macaca_fascicularis	0.418	10.2	2.743	0.564	-0.05
CHD5-r3-Macaca_mulatta	0.418	10.2	2.743	0.564	-0.05
CHD5-r3-Macaca_nemestrina	0.418	10.2	2.743	0.564	-0.05
CHD5-r3-Macaca_thibetana_thibetana	0.418	10.2	2.743	0.564	-0.05
CHD5-r3-Mandrillus_leucophaeus	0.417	10.207	2.71	0.556	0.0
CHD5-r3-Microcebus_murinus	0.42	10.206	2.694	0.564	-0.05
CHD5-r3-Nomascus_leucogenys	0.419	10.204	2.714	0.564	-0.05
CHD5-r3-Nycticebus_coucang	0.383	10.193	2.77	0.561	-0.029
CHD5-r3-Otolemur_garnettii	0.321	10.213	2.644	0.5	-0.05
CHD5-r3-Pan_paniscus	0.42	10.206	2.69	0.564	-0.05
CHD5-r3-Pan_troglodytes	0.42	10.206	2.69	0.564	-0.05
CHD5-r3-Papio_anubis	0.418	10.2	2.743	0.564	-0.05
CHD5-r3-Piliocolobus_tephrosceles	0.418	10.2	2.743	0.564	-0.05
CHD5-r3-Pongo_abelii	0.419	10.204	2.714	0.564	-0.05
CHD5-r3-Pongo_pygmaeus	0.419	10.204	2.714	0.564	-0.05
CHD5-r3-Propithecus_coquereli	0.42	10.206	2.692	0.564	-0.05
CHD5-r3-Rhinopithecus_bieti	0.429	10.169	3.003	0.514	-0.014
CHD5-r3-Saimiri_boliviensis	0.419	10.203	2.717	0.564	-0.05
CHD5-r3-Sapajus_apella	0.419	10.204	2.714	0.564	-0.05
CHD5-r3-Symphalangus_syndactylus	0.419	10.204	2.714	0.564	-0.05
CHD5-r3-Theropithecus_gelada	0.418	10.2	2.743	0.564	-0.05
CHD5-r3-Trachypithecus_francoisi	0.418	10.2	2.743	0.564	-0.05
CHD5-r4-Aotus_nancymaae	0.541	10.225	2.861	0.325	-0.065
CHD5-r4-Callithrix_jacchus	0.537	10.181	3.157	0.324	-0.076
CHD5-r4-Cebus_imitator	0.541	10.225	2.861	0.325	-0.065
CHD5-r4-Cercocebus_atys	0.541	10.225	2.861	0.325	-0.065
CHD5-r4-Chlorocebus_sabaeus	0.542	10.227	2.849	0.325	-0.065
CHD5-r4-Colobus_angolensis_palliatus	0.541	10.225	2.861	0.325	-0.065
CHD5-r4-Gorilla_gorilla_gorilla	0.541	10.225	2.861	0.325	-0.065
CHD5-r4-Homo_sapiens	0.541	10.225	2.861	0.325	-0.065
CHD5-r4-Hylobates_moloch	0.538	10.182	3.137	0.327	-0.069
CHD5-r4-Lemur_catta	0.542	10.228	2.845	0.325	-0.065
CHD5-r4-Macaca_fascicularis	0.541	10.225	2.861	0.325	-0.065
CHD5-r4-Macaca_mulatta	0.541	10.225	2.861	0.325	-0.065
CHD5-r4-Macaca_nemestrina	0.541	10.225	2.861	0.325	-0.065
CHD5-r4-Macaca_thibetana_thibetana	0.541	10.225	2.861	0.325	-0.065
CHD5-r4-Mandrillus_leucophaeus	0.541	10.225	2.861	0.325	-0.065
CHD5-r4-Microcebus_murinus	0.539	10.188	3.109	0.333	-0.078
CHD5-r4-Nomascus_leucogenys	0.541	10.225	2.861	0.325	-0.065
CHD5-r4-Nycticebus_coucang	0.544	10.243	2.732	0.333	-0.067
CHD5-r4-Otolemur_garnettii	0.539	10.188	3.1	0.33	-0.07
CHD5-r4-Pan_paniscus	0.541	10.225	2.861	0.325	-0.065
CHD5-r4-Pan_troglodytes	0.541	10.225	2.861	0.325	-0.065
CHD5-r4-Papio_anubis	0.541	10.225	2.861	0.325	-0.065
CHD5-r4-Piliocolobus_tephrosceles	0.541	10.225	2.861	0.325	-0.065
CHD5-r4-Pongo_abelii	0.548	10.232	2.852	0.308	-0.077
CHD5-r4-Pongo_pygmaeus	0.541	10.225	2.861	0.325	-0.065
CHD5-r4-Propithecus_coquereli	0.541	10.224	2.872	0.325	-0.065
CHD5-r4-Rhinopithecus_bieti	0.543	10.232	2.814	0.325	-0.065
CHD5-r4-Rhinopithecus_roxellana	0.543	10.232	2.814	0.325	-0.065
CHD5-r4-Saimiri_boliviensis	0.541	10.225	2.861	0.325	-0.065
CHD5-r4-Sapajus_apella	0.541	10.225	2.861	0.325	-0.065
CHD5-r4-Symphalangus_syndactylus	0.541	10.225	2.861	0.325	-0.065
CHD5-r4-Theropithecus_gelada	0.541	10.225	2.861	0.325	-0.065
CHD5-r4-Trachypithecus_francoisi	0.549	10.236	2.823	0.308	-0.077
CHD5-r5-Aotus_nancymaae	0.527	10.096	3.728	0.115	0.0
CHD5-r5-Callithrix_jacchus	0.527	10.096	3.728	0.115	0.0
CHD5-r5-Cebus_imitator	0.527	10.096	3.728	0.115	0.0
CHD5-r5-Cercocebus_atys	0.527	10.096	3.728	0.115	0.0
CHD5-r5-Chlorocebus_sabaeus	0.527	10.096	3.728	0.115	0.0
CHD5-r5-Colobus_angolensis_palliatus	0.526	10.095	3.734	0.115	0.0
CHD5-r5-Gorilla_gorilla_gorilla	0.527	10.096	3.728	0.115	0.0
CHD5-r5-Homo_sapiens	0.527	10.096	3.728	0.115	0.0
CHD5-r5-Lemur_catta	0.528	10.102	3.696	0.115	0.0
CHD5-r5-Macaca_fascicularis	0.527	10.096	3.728	0.115	0.0
CHD5-r5-Macaca_mulatta	0.527	10.096	3.728	0.115	0.0
CHD5-r5-Macaca_nemestrina	0.527	10.096	3.728	0.115	0.0
CHD5-r5-Macaca_thibetana_thibetana	0.527	10.096	3.728	0.115	0.0
CHD5-r5-Mandrillus_leucophaeus	0.527	10.096	3.728	0.115	0.0
CHD5-r5-Nomascus_leucogenys	0.527	10.096	3.728	0.115	0.0
CHD5-r5-Otolemur_garnettii	0.527	10.097	3.723	0.115	0.0
CHD5-r5-Pan_paniscus	0.527	10.096	3.728	0.115	0.0
CHD5-r5-Pan_troglodytes	0.527	10.096	3.728	0.115	0.0
CHD5-r5-Papio_anubis	0.527	10.096	3.728	0.115	0.0
CHD5-r5-Piliocolobus_tephrosceles	0.526	10.095	3.734	0.115	0.0
CHD5-r5-Pongo_abelii	0.527	10.096	3.728	0.115	0.0
CHD5-r5-Pongo_pygmaeus	0.527	10.096	3.728	0.115	0.0
CHD5-r5-Propithecus_coquereli	0.527	10.097	3.723	0.115	0.0
CHD5-r5-Rhinopithecus_bieti	0.526	10.095	3.734	0.115	0.0
CHD5-r5-Rhinopithecus_roxellana	0.526	10.095	3.734	0.115	0.0
CHD5-r5-Saimiri_boliviensis	0.527	10.096	3.728	0.115	0.0
CHD5-r5-Sapajus_apella	0.527	10.096	3.728	0.115	0.0
CHD5-r5-Symphalangus_syndactylus	0.527	10.096	3.728	0.115	0.0
CHD5-r5-Theropithecus_gelada	0.527	10.096	3.728	0.115	0.0
CHD5-r5-Trachypithecus_francoisi	0.526	10.095	3.734	0.115	0.0
DDX4-r0-Aotus_nancymaae	0.468	9.926	4.935	0.287	-0.008
DDX4-r0-Callithrix_jacchus	0.464	9.918	4.985	0.275	-0.004
DDX4-r0-Carlito_syrichta	0.477	9.95	4.739	0.286	-0.018
DDX4-r0-Cebus_imitator	0.458	9.914	5.011	0.289	0.0
DDX4-r0-Chlorocebus_sabaeus	0.47	9.927	4.926	0.291	-0.012
DDX4-r0-Colobus_angolensis_palliatus	0.47	9.912	5.02	0.274	-0.02
DDX4-r0-Gorilla_gorilla_gorilla	0.468	9.919	4.976	0.287	-0.016
DDX4-r0-Homo_sapiens	0.468	9.92	4.971	0.288	-0.016
DDX4-r0-Hylobates_moloch	0.466	9.918	4.988	0.28	-0.012
DDX4-r0-Lemur_catta	0.457	9.915	5.004	0.29	0.0
DDX4-r0-Macaca_fascicularis	0.478	9.935	4.887	0.287	-0.019
DDX4-r0-Macaca_mulatta	0.478	9.935	4.887	0.287	-0.019
DDX4-r0-Macaca_nemestrina	0.478	9.935	4.887	0.287	-0.019
DDX4-r0-Macaca_thibetana_thibetana	0.478	9.935	4.887	0.287	-0.019
DDX4-r0-Microcebus_murinus	0.464	9.913	5.009	0.29	0.0
DDX4-r0-Nomascus_leucogenys	0.465	9.923	4.96	0.287	-0.012
DDX4-r0-Nycticebus_coucang	0.468	9.921	4.958	0.286	-0.004
DDX4-r0-Otolemur_garnettii	0.468	9.92	4.97	0.284	-0.004
DDX4-r0-Pan_paniscus	0.468	9.92	4.971	0.288	-0.016
DDX4-r0-Pan_troglodytes	0.468	9.92	4.971	0.288	-0.016
DDX4-r0-Papio_anubis	0.469	9.925	4.935	0.289	-0.016
DDX4-r0-Piliocolobus_tephrosceles	0.469	9.922	4.955	0.283	-0.012
DDX4-r0-Pongo_abelii	0.469	9.925	4.956	0.289	-0.011
DDX4-r0-Pongo_pygmaeus	0.469	9.925	4.956	0.289	-0.011
DDX4-r0-Rhinopithecus_bieti	0.466	9.932	4.903	0.295	-0.008
DDX4-r0-Rhinopithecus_roxellana	0.468	9.924	4.946	0.284	-0.012
DDX4-r0-Saimiri_boliviensis	0.461	9.913	5.013	0.284	-0.004
DDX4-r0-Sapajus_apella	0.457	9.91	5.034	0.289	0.0
DDX4-r0-Symphalangus_syndactylus	0.47	9.925	4.942	0.289	-0.02
DDX4-r0-Theropithecus_gelada	0.47	9.926	4.929	0.287	-0.016
DDX4-r0-Trachypithecus_francoisi	0.471	9.928	4.912	0.285	-0.02
DDX4-r0-Mandrillus_leucophaeus	0.471	9.928	4.92	0.286	-0.016
DDX4-r0-Propithecus_coquereli	0.454	9.935	4.799	0.302	0.021
DDX4-r1-Aotus_nancymaae	0.503	10.213	3.04	0.239	-0.022
DDX4-r1-Callithrix_jacchus	0.499	10.229	2.954	0.256	-0.023
DDX4-r1-Carlito_syrichta	0.498	10.268	2.733	0.275	-0.025
DDX4-r1-Cebus_imitator	0.496	10.266	2.745	0.275	-0.025
DDX4-r1-Chlorocebus_sabaeus	0.496	10.273	2.699	0.282	-0.026
DDX4-r1-Colobus_angolensis_palliatus	0.496	10.273	2.699	0.282	-0.026
DDX4-r1-Gorilla_gorilla_gorilla	0.492	10.271	2.724	0.289	-0.026
DDX4-r1-Homo_sapiens	0.495	10.282	2.65	0.289	-0.026
DDX4-r1-Hylobates_moloch	0.496	10.266	2.745	0.275	-0.025
DDX4-r1-Lemur_catta	0.493	10.253	2.82	0.275	-0.025
DDX4-r1-Macaca_fascicularis	0.496	10.273	2.699	0.282	-0.026
DDX4-r1-Macaca_mulatta	0.496	10.273	2.699	0.282	-0.026
DDX4-r1-Macaca_nemestrina	0.496	10.273	2.699	0.282	-0.026
DDX4-r1-Macaca_thibetana_thibetana	0.496	10.273	2.699	0.282	-0.026
DDX4-r1-Microcebus_murinus	0.5	10.225	2.978	0.25	-0.023
DDX4-r1-Nomascus_leucogenys	0.496	10.266	2.745	0.275	-0.025
DDX4-r1-Nycticebus_coucang	0.497	10.267	2.739	0.275	-0.025
DDX4-r1-Otolemur_garnettii	0.495	10.282	2.65	0.289	-0.026
DDX4-r1-Pan_paniscus	0.495	10.282	2.65	0.289	-0.026
DDX4-r1-Pan_troglodytes	0.495	10.282	2.65	0.289	-0.026
DDX4-r1-Papio_anubis	0.496	10.273	2.699	0.282	-0.026
DDX4-r1-Piliocolobus_tephrosceles	0.496	10.273	2.699	0.282	-0.026
DDX4-r1-Pongo_abelii	0.495	10.282	2.65	0.289	-0.026
DDX4-r1-Pongo_pygmaeus	0.495	10.282	2.65	0.289	-0.026
DDX4-r1-Rhinopithecus_bieti	0.496	10.275	2.687	0.282	-0.026
DDX4-r1-Rhinopithecus_roxellana	0.496	10.275	2.687	0.282	-0.026
DDX4-r1-Saimiri_boliviensis	0.511	10.313	2.524	0.286	-0.057
DDX4-r1-Sapajus_apella	0.501	10.236	2.913	0.256	-0.023
DDX4-r1-Symphalangus_syndactylus	0.496	10.266	2.745	0.275	-0.025
DDX4-r1-Theropithecus_gelada	0.496	10.273	2.699	0.282	-0.026
DDX4-r1-Trachypithecus_francoisi	0.496	10.275	2.687	0.282	-0.026
DHX9-r0-Aotus_nancymaae	0.505	10.046	3.996	0.255	-0.013
DHX9-r0-Callithrix_jacchus	0.506	10.049	3.976	0.253	-0.013
DHX9-r0-Carlito_syrichta	0.536	10.1	3.656	0.218	-0.036
DHX9-r0-Cebus_imitator	0.506	10.044	4.013	0.252	-0.006
DHX9-r0-Cercocebus_atys	0.506	10.052	3.956	0.256	-0.013
DHX9-r0-Chlorocebus_sabaeus	0.508	10.05	3.968	0.252	-0.006
DHX9-r0-Colobus_angolensis_palliatus	0.506	10.052	3.956	0.256	-0.013
DHX9-r0-Gorilla_gorilla_gorilla	0.506	10.052	3.956	0.255	-0.013
DHX9-r0-Homo_sapiens	0.506	10.052	3.956	0.255	-0.013
DHX9-r0-Hylobates_moloch	0.506	10.052	3.951	0.253	-0.013
DHX9-r0-Lemur_catta	0.503	10.036	4.081	0.242	-0.012
DHX9-r0-Macaca_fascicularis	0.506	10.052	3.956	0.256	-0.013
DHX9-r0-Macaca_mulatta	0.506	10.052	3.956	0.256	-0.013
DHX9-r0-Macaca_nemestrina	0.506	10.052	3.956	0.256	-0.013
DHX9-r0-Macaca_thibetana_thibetana	0.508	10.05	3.968	0.252	-0.006
DHX9-r0-Mandrillus_leucophaeus	0.506	10.052	3.956	0.256	-0.013
DHX9-r0-Microcebus_murinus	0.51	10.039	4.051	0.234	0.006
DHX9-r0-Nomascus_leucogenys	0.506	10.051	3.962	0.256	-0.013
DHX9-r0-Nycticebus_coucang	0.51	10.042	4.03	0.226	0.0
DHX9-r0-Otolemur_garnettii	0.541	10.114	3.552	0.211	-0.035
DHX9-r0-Pan_paniscus	0.506	10.052	3.956	0.255	-0.013
DHX9-r0-Pan_troglodytes	0.506	10.052	3.956	0.255	-0.013
DHX9-r0-Papio_anubis	0.506	10.052	3.956	0.256	-0.013
DHX9-r0-Piliocolobus_tephrosceles	0.505	10.049	3.977	0.256	-0.013
DHX9-r0-Pongo_abelii	0.506	10.052	3.956	0.255	-0.013
DHX9-r0-Pongo_pygmaeus	0.506	10.052	3.956	0.255	-0.013
DHX9-r0-Propithecus_coquereli	0.509	10.035	4.08	0.233	0.006
DHX9-r0-Rhinopithecus_bieti	0.506	10.052	3.956	0.256	-0.013
DHX9-r0-Rhinopithecus_roxellana	0.506	10.052	3.956	0.256	-0.013
DHX9-r0-Saimiri_boliviensis	0.505	10.045	4.007	0.255	-0.013
DHX9-r0-Sapajus_apella	0.505	10.047	3.995	0.253	-0.013
DHX9-r0-Symphalangus_syndactylus	0.506	10.051	3.962	0.256	-0.013
DHX9-r0-Theropithecus_gelada	0.506	10.052	3.956	0.256	-0.013
DHX9-r0-Trachypithecus_francoisi	0.507	10.053	3.95	0.255	-0.013
DHX9-r1-Aotus_nancymaae	0.538	10.273	2.838	0.147	-0.029
DHX9-r1-Callithrix_jacchus	0.554	10.264	2.891	0.162	-0.054
DHX9-r1-Cebus_imitator	0.553	10.253	2.965	0.158	-0.053
DHX9-r1-Cercocebus_atys	0.538	10.273	2.838	0.147	-0.029
DHX9-r1-Chlorocebus_sabaeus	0.538	10.273	2.838	0.147	-0.029
DHX9-r1-Colobus_angolensis_palliatus	0.538	10.273	2.838	0.147	-0.029
DHX9-r1-Gorilla_gorilla_gorilla	0.555	10.271	2.869	0.167	-0.056
DHX9-r1-Homo_sapiens	0.555	10.271	2.869	0.167	-0.056
DHX9-r1-Hylobates_moloch	0.553	10.254	2.957	0.158	-0.053
DHX9-r1-Lemur_catta	0.533	10.297	2.759	0.167	-0.033
DHX9-r1-Macaca_fascicularis	0.555	10.271	2.869	0.167	-0.056
DHX9-r1-Macaca_mulatta	0.555	10.271	2.869	0.167	-0.056
DHX9-r1-Macaca_nemestrina	0.555	10.271	2.869	0.167	-0.056
DHX9-r1-Macaca_thibetana_thibetana	0.538	10.273	2.838	0.147	-0.029
DHX9-r1-Mandrillus_leucophaeus	0.538	10.273	2.838	0.147	-0.029
DHX9-r1-Nomascus_leucogenys	0.555	10.271	2.869	0.167	-0.056
DHX9-r1-Pan_paniscus	0.555	10.271	2.869	0.167	-0.056
DHX9-r1-Pan_troglodytes	0.555	10.271	2.869	0.167	-0.056
DHX9-r1-Papio_anubis	0.538	10.273	2.838	0.147	-0.029
DHX9-r1-Piliocolobus_tephrosceles	0.538	10.273	2.838	0.147	-0.029
DHX9-r1-Pongo_abelii	0.554	10.264	2.891	0.162	-0.054
DHX9-r1-Pongo_pygmaeus	0.554	10.264	2.891	0.162	-0.054
DHX9-r1-Rhinopithecus_bieti	0.551	10.28	2.808	0.114	-0.057
DHX9-r1-Rhinopithecus_roxellana	0.551	10.28	2.808	0.114	-0.057
DHX9-r1-Saimiri_boliviensis	0.551	10.28	2.808	0.114	-0.057
DHX9-r1-Sapajus_apella	0.555	10.206	3.139	0.132	-0.057
DHX9-r1-Symphalangus_syndactylus	0.555	10.271	2.869	0.167	-0.056
DHX9-r1-Theropithecus_gelada	0.538	10.273	2.838	0.147	-0.029
DHX9-r1-Trachypithecus_francoisi	0.538	10.273	2.838	0.147	-0.029
DHX9-r2-Aotus_nancymaae	0.499	9.773	5.569	0.155	0.093
DHX9-r2-Callithrix_jacchus	0.497	9.761	5.621	0.155	0.093
DHX9-r2-Carlito_syrichta	0.487	9.698	5.878	0.154	0.092
DHX9-r2-Cebus_imitator	0.498	9.771	5.577	0.155	0.093
DHX9-r2-Cercocebus_atys	0.493	9.736	5.731	0.15	0.09
DHX9-r2-Chlorocebus_sabaeus	0.493	9.736	5.731	0.15	0.09
DHX9-r2-Colobus_angolensis_palliatus	0.494	9.743	5.707	0.15	0.09
DHX9-r2-Gorilla_gorilla_gorilla	0.497	9.762	5.614	0.155	0.093
DHX9-r2-Homo_sapiens	0.497	9.762	5.614	0.155	0.093
DHX9-r2-Hylobates_moloch	0.462	9.747	5.628	0.169	0.056
DHX9-r2-Lemur_catta	0.489	9.709	5.837	0.153	0.092
DHX9-r2-Macaca_fascicularis	0.493	9.736	5.731	0.15	0.09
DHX9-r2-Macaca_mulatta	0.493	9.736	5.731	0.15	0.09
DHX9-r2-Macaca_nemestrina	0.493	9.736	5.731	0.15	0.09
DHX9-r2-Macaca_thibetana_thibetana	0.491	9.722	5.803	0.145	0.087
DHX9-r2-Mandrillus_leucophaeus	0.493	9.736	5.731	0.15	0.09
DHX9-r2-Microcebus_murinus	0.493	9.73	5.719	0.165	0.099
DHX9-r2-Nomascus_leucogenys	0.492	9.733	5.759	0.145	0.087
DHX9-r2-Nycticebus_coucang	0.489	9.708	5.849	0.149	0.09
DHX9-r2-Otolemur_garnettii	0.492	9.728	5.76	0.154	0.092
DHX9-r2-Pan_paniscus	0.497	9.762	5.614	0.155	0.093
DHX9-r2-Pan_troglodytes	0.497	9.762	5.614	0.155	0.093
DHX9-r2-Papio_anubis	0.493	9.736	5.731	0.15	0.09
DHX9-r2-Piliocolobus_tephrosceles	0.494	9.742	5.709	0.15	0.09
DHX9-r2-Pongo_abelii	0.497	9.762	5.613	0.156	0.094
DHX9-r2-Pongo_pygmaeus	0.497	9.762	5.613	0.156	0.094
DHX9-r2-Propithecus_coquereli	0.495	9.744	5.663	0.168	0.101
DHX9-r2-Rhinopithecus_bieti	0.494	9.743	5.704	0.15	0.09
DHX9-r2-Rhinopithecus_roxellana	0.494	9.743	5.704	0.15	0.09
DHX9-r2-Saimiri_boliviensis	0.495	9.752	5.67	0.15	0.09
DHX9-r2-Sapajus_apella	0.498	9.771	5.577	0.155	0.093
DHX9-r2-Symphalangus_syndactylus	0.493	9.737	5.742	0.145	0.087
DHX9-r2-Theropithecus_gelada	0.493	9.736	5.731	0.15	0.09
DHX9-r2-Trachypithecus_francoisi	0.494	9.743	5.704	0.15	0.09
DNMT1-r0-Aotus_nancymaae	0.41	10.399	1.748	0.514	-0.027
DNMT1-r0-Callithrix_jacchus	0.41	10.399	1.748	0.514	-0.027
DNMT1-r0-Carlito_syrichta	0.41	10.399	1.748	0.514	-0.027
DNMT1-r0-Cebus_imitator	0.41	10.399	1.748	0.514	-0.027
DNMT1-r0-Cercocebus_atys	0.41	10.399	1.748	0.514	-0.027
DNMT1-r0-Chlorocebus_sabaeus	0.41	10.399	1.748	0.514	-0.027
DNMT1-r0-Colobus_angolensis_palliatus	0.41	10.399	1.748	0.514	-0.027
DNMT1-r0-Gorilla_gorilla_gorilla	0.41	10.399	1.748	0.514	-0.027
DNMT1-r0-Homo_sapiens	0.41	10.399	1.748	0.514	-0.027
DNMT1-r0-Hylobates_moloch	0.41	10.399	1.748	0.514	-0.027
DNMT1-r0-Lemur_catta	0.41	10.399	1.748	0.514	-0.027
DNMT1-r0-Macaca_fascicularis	0.404	10.404	1.711	0.528	-0.028
DNMT1-r0-Macaca_mulatta	0.404	10.404	1.711	0.528	-0.028
DNMT1-r0-Macaca_nemestrina	0.404	10.404	1.711	0.528	-0.028
DNMT1-r0-Macaca_thibetana_thibetana	0.41	10.399	1.748	0.514	-0.027
DNMT1-r0-Mandrillus_leucophaeus	0.404	10.404	1.711	0.528	-0.028
DNMT1-r0-Microcebus_murinus	0.41	10.399	1.748	0.514	-0.027
DNMT1-r0-Nomascus_leucogenys	0.41	10.399	1.748	0.514	-0.027
DNMT1-r0-Nycticebus_coucang	0.404	10.404	1.711	0.528	-0.028
DNMT1-r0-Otolemur_garnettii	0.404	10.404	1.711	0.528	-0.028
DNMT1-r0-Pan_paniscus	0.41	10.399	1.748	0.514	-0.027
DNMT1-r0-Pan_troglodytes	0.41	10.399	1.748	0.514	-0.027
DNMT1-r0-Papio_anubis	0.41	10.399	1.748	0.514	-0.027
DNMT1-r0-Piliocolobus_tephrosceles	0.41	10.399	1.748	0.514	-0.027
DNMT1-r0-Pongo_abelii	0.41	10.399	1.748	0.514	-0.027
DNMT1-r0-Pongo_pygmaeus	0.41	10.399	1.748	0.514	-0.027
DNMT1-r0-Propithecus_coquereli	0.41	10.399	1.748	0.514	-0.027
DNMT1-r0-Rhinopithecus_bieti	0.41	10.399	1.748	0.514	-0.027
DNMT1-r0-Rhinopithecus_roxellana	0.41	10.399	1.748	0.514	-0.027
DNMT1-r0-Saimiri_boliviensis	0.384	10.385	1.818	0.474	0.0
DNMT1-r0-Sapajus_apella	0.41	10.399	1.748	0.514	-0.027
DNMT1-r0-Symphalangus_syndactylus	0.41	10.399	1.748	0.514	-0.027
DNMT1-r0-Theropithecus_gelada	0.41	10.399	1.748	0.514	-0.027
DNMT1-r0-Trachypithecus_francoisi	0.41	10.399	1.748	0.514	-0.027
DNMT1-r1-Aotus_nancymaae	0.511	10.118	3.398	0.502	0.031
DNMT1-r1-Callithrix_jacchus	0.514	10.12	3.398	0.494	0.039
DNMT1-r1-Carlito_syrichta	0.517	10.297	2.265	0.592	0.013
DNMT1-r1-Cebus_imitator	0.511	10.115	3.431	0.498	0.035
DNMT1-r1-Cercocebus_atys	0.508	10.123	3.336	0.504	0.023
DNMT1-r1-Chlorocebus_sabaeus	0.507	10.122	3.34	0.504	0.023
DNMT1-r1-Colobus_angolensis_palliatus	0.508	10.122	3.341	0.502	0.023
DNMT1-r1-Gorilla_gorilla_gorilla	0.512	10.122	3.378	0.502	0.039
DNMT1-r1-Homo_sapiens	0.51	10.109	3.478	0.487	0.04
DNMT1-r1-Hylobates_moloch	0.51	10.127	3.299	0.506	0.027
DNMT1-r1-Lemur_catta	0.505	10.115	3.402	0.492	0.023
DNMT1-r1-Macaca_fascicularis	0.507	10.143	3.169	0.511	0.004
DNMT1-r1-Macaca_mulatta	0.507	10.143	3.169	0.511	0.004
DNMT1-r1-Macaca_nemestrina	0.507	10.143	3.169	0.511	0.004
DNMT1-r1-Macaca_thibetana_thibetana	0.507	10.143	3.169	0.511	0.004
DNMT1-r1-Mandrillus_leucophaeus	0.512	10.12	3.355	0.472	0.019
DNMT1-r1-Microcebus_murinus	0.51	10.109	3.498	0.469	0.035
DNMT1-r1-Nomascus_leucogenys	0.51	10.127	3.304	0.508	0.027
DNMT1-r1-Nycticebus_coucang	0.514	10.121	3.437	0.467	0.042
DNMT1-r1-Pan_paniscus	0.511	10.109	3.473	0.486	0.036
DNMT1-r1-Pan_troglodytes	0.511	10.114	3.462	0.487	0.044
DNMT1-r1-Papio_anubis	0.508	10.123	3.334	0.5	0.019
DNMT1-r1-Piliocolobus_tephrosceles	0.509	10.122	3.34	0.498	0.023
DNMT1-r1-Pongo_abelii	0.513	10.13	3.303	0.508	0.038
DNMT1-r1-Pongo_pygmaeus	0.513	10.128	3.315	0.502	0.034
DNMT1-r1-Propithecus_coquereli	0.489	10.106	3.442	0.467	0.0
DNMT1-r1-Rhinopithecus_bieti	0.498	10.114	3.418	0.491	0.013
DNMT1-r1-Rhinopithecus_roxellana	0.508	10.122	3.348	0.504	0.023
DNMT1-r1-Saimiri_boliviensis	0.513	10.116	3.418	0.494	0.031
DNMT1-r1-Sapajus_apella	0.512	10.114	3.437	0.492	0.035
DNMT1-r1-Symphalangus_syndactylus	0.512	10.125	3.33	0.506	0.031
DNMT1-r1-Theropithecus_gelada	0.507	10.122	3.34	0.5	0.019
DNMT1-r1-Trachypithecus_francoisi	0.508	10.123	3.332	0.504	0.023
DNMT1-r3-Aotus_nancymaae	0.505	10.314	2.457	0.395	0.079
DNMT1-r3-Callithrix_jacchus	0.505	10.314	2.457	0.395	0.079
DNMT1-r3-Carlito_syrichta	0.52	10.307	2.584	0.389	0.111
DNMT1-r3-Cebus_imitator	0.505	10.314	2.457	0.395	0.079
DNMT1-r3-Cercocebus_atys	0.523	10.323	2.481	0.389	0.111
DNMT1-r3-Chlorocebus_sabaeus	0.523	10.323	2.481	0.389	0.111
DNMT1-r3-Colobus_angolensis_palliatus	0.523	10.323	2.481	0.389	0.111
DNMT1-r3-Gorilla_gorilla_gorilla	0.542	10.338	2.502	0.382	0.147
DNMT1-r3-Homo_sapiens	0.542	10.338	2.502	0.382	0.147
DNMT1-r3-Hylobates_moloch	0.523	10.323	2.481	0.389	0.111
DNMT1-r3-Lemur_catta	0.505	10.297	2.568	0.41	0.103
DNMT1-r3-Macaca_fascicularis	0.523	10.323	2.481	0.389	0.111
DNMT1-r3-Macaca_mulatta	0.523	10.323	2.481	0.389	0.111
DNMT1-r3-Macaca_nemestrina	0.523	10.323	2.481	0.389	0.111
DNMT1-r3-Macaca_thibetana_thibetana	0.523	10.323	2.481	0.389	0.111
DNMT1-r3-Mandrillus_leucophaeus	0.523	10.323	2.481	0.389	0.111
DNMT1-r3-Microcebus_murinus	0.501	10.298	2.568	0.395	0.079
DNMT1-r3-Nomascus_leucogenys	0.523	10.323	2.481	0.389	0.111
DNMT1-r3-Nycticebus_coucang	0.508	10.301	2.519	0.4	0.1
DNMT1-r3-Otolemur_garnettii	0.505	10.312	2.474	0.395	0.079
DNMT1-r3-Pan_paniscus	0.53	10.327	2.476	0.417	0.139
DNMT1-r3-Pan_troglodytes	0.542	10.338	2.502	0.382	0.147
DNMT1-r3-Papio_anubis	0.533	10.326	2.438	0.385	0.128
DNMT1-r3-Piliocolobus_tephrosceles	0.523	10.323	2.481	0.389	0.111
DNMT1-r3-Pongo_abelii	0.523	10.332	2.439	0.412	0.118
DNMT1-r3-Pongo_pygmaeus	0.542	10.346	2.465	0.394	0.152
DNMT1-r3-Propithecus_coquereli	0.505	10.297	2.568	0.41	0.103
DNMT1-r3-Rhinopithecus_bieti	0.523	10.323	2.481	0.389	0.111
DNMT1-r3-Rhinopithecus_roxellana	0.523	10.323	2.481	0.389	0.111
DNMT1-r3-Saimiri_boliviensis	0.505	10.314	2.457	0.395	0.079
DNMT1-r3-Sapajus_apella	0.505	10.314	2.457	0.395	0.079
DNMT1-r3-Symphalangus_syndactylus	0.53	10.325	2.482	0.405	0.135
DNMT1-r3-Theropithecus_gelada	0.533	10.326	2.438	0.385	0.128
DNMT1-r3-Trachypithecus_francoisi	0.523	10.323	2.481	0.389	0.111
DNMT3A-r0-Aotus_nancymaae	0.511	10.062	3.931	0.349	-0.039
DNMT3A-r0-Callithrix_jacchus	0.51	10.067	3.907	0.351	-0.042
DNMT3A-r0-Carlito_syrichta	0.516	10.062	3.921	0.303	-0.04
DNMT3A-r0-Cebus_imitator	0.511	10.067	3.902	0.351	-0.042
DNMT3A-r0-Cercocebus_atys	0.511	10.062	3.931	0.347	-0.039
DNMT3A-r0-Chlorocebus_sabaeus	0.511	10.063	3.923	0.347	-0.039
DNMT3A-r0-Colobus_angolensis_palliatus	0.511	10.063	3.924	0.347	-0.039
DNMT3A-r0-Gorilla_gorilla_gorilla	0.51	10.059	3.96	0.347	-0.039
DNMT3A-r0-Homo_sapiens	0.51	10.058	3.969	0.344	-0.038
DNMT3A-r0-Hylobates_moloch	0.505	10.061	3.989	0.35	-0.049
DNMT3A-r0-Lemur_catta	0.511	10.07	3.878	0.351	-0.042
DNMT3A-r0-Macaca_fascicularis	0.511	10.062	3.927	0.347	-0.039
DNMT3A-r0-Macaca_mulatta	0.511	10.062	3.927	0.347	-0.039
DNMT3A-r0-Macaca_nemestrina	0.511	10.062	3.931	0.347	-0.039
DNMT3A-r0-Macaca_thibetana_thibetana	0.511	10.062	3.927	0.347	-0.039
DNMT3A-r0-Mandrillus_leucophaeus	0.511	10.062	3.931	0.347	-0.039
DNMT3A-r0-Microcebus_murinus	0.511	10.07	3.881	0.351	-0.042
DNMT3A-r0-Nomascus_leucogenys	0.51	10.06	3.944	0.347	-0.039
DNMT3A-r0-Nycticebus_coucang	0.511	10.069	3.889	0.351	-0.042
DNMT3A-r0-Otolemur_garnettii	0.512	10.069	3.875	0.349	-0.039
DNMT3A-r0-Pan_paniscus	0.51	10.059	3.953	0.347	-0.039
DNMT3A-r0-Pan_troglodytes	0.51	10.059	3.953	0.347	-0.039
DNMT3A-r0-Papio_anubis	0.511	10.062	3.927	0.347	-0.039
DNMT3A-r0-Piliocolobus_tephrosceles	0.511	10.063	3.923	0.347	-0.039
DNMT3A-r0-Pongo_abelii	0.51	10.06	3.952	0.347	-0.039
DNMT3A-r0-Pongo_pygmaeus	0.51	10.058	3.963	0.347	-0.039
DNMT3A-r0-Propithecus_coquereli	0.511	10.068	3.893	0.351	-0.042
DNMT3A-r0-Rhinopithecus_bieti	0.511	10.063	3.92	0.347	-0.039
DNMT3A-r0-Rhinopithecus_roxellana	0.509	10.054	4.009	0.343	-0.038
DNMT3A-r0-Saimiri_boliviensis	0.51	10.066	3.909	0.351	-0.042
DNMT3A-r0-Sapajus_apella	0.511	10.067	3.902	0.351	-0.042
DNMT3A-r0-Symphalangus_syndactylus	0.51	10.059	3.957	0.347	-0.039
DNMT3A-r0-Theropithecus_gelada	0.511	10.062	3.927	0.347	-0.039
DNMT3A-r0-Trachypithecus_francoisi	0.508	10.053	4.022	0.343	-0.038
DNMT3A-r1-Aotus_nancymaae	0.535	10.303	2.406	0.377	0.0
DNMT3A-r1-Callithrix_jacchus	0.535	10.303	2.406	0.377	0.0
DNMT3A-r1-Carlito_syrichta	0.534	10.296	2.466	0.37	0.0
DNMT3A-r1-Cebus_imitator	0.535	10.303	2.406	0.377	0.0
DNMT3A-r1-Cercocebus_atys	0.534	10.288	2.52	0.364	0.0
DNMT3A-r1-Chlorocebus_sabaeus	0.534	10.288	2.52	0.364	0.0
DNMT3A-r1-Colobus_angolensis_palliatus	0.534	10.288	2.52	0.364	0.0
DNMT3A-r1-Gorilla_gorilla_gorilla	0.534	10.289	2.508	0.364	0.0
DNMT3A-r1-Homo_sapiens	0.534	10.289	2.508	0.364	0.0
DNMT3A-r1-Hylobates_moloch	0.534	10.289	2.508	0.364	0.0
DNMT3A-r1-Lemur_catta	0.534	10.296	2.466	0.37	0.0
DNMT3A-r1-Macaca_fascicularis	0.534	10.288	2.52	0.364	0.0
DNMT3A-r1-Macaca_mulatta	0.534	10.288	2.52	0.364	0.0
DNMT3A-r1-Macaca_nemestrina	0.534	10.288	2.52	0.364	0.0
DNMT3A-r1-Macaca_thibetana_thibetana	0.534	10.288	2.52	0.364	0.0
DNMT3A-r1-Mandrillus_leucophaeus	0.534	10.288	2.52	0.364	0.0
DNMT3A-r1-Microcebus_murinus	0.534	10.296	2.466	0.37	0.0
DNMT3A-r1-Nomascus_leucogenys	0.534	10.289	2.508	0.364	0.0
DNMT3A-r1-Nycticebus_coucang	0.533	10.292	2.473	0.345	0.018
DNMT3A-r1-Otolemur_garnettii	0.533	10.292	2.473	0.345	0.018
DNMT3A-r1-Pan_paniscus	0.534	10.289	2.508	0.364	0.0
DNMT3A-r1-Pan_troglodytes	0.534	10.289	2.508	0.364	0.0
DNMT3A-r1-Papio_anubis	0.534	10.288	2.52	0.364	0.0
DNMT3A-r1-Piliocolobus_tephrosceles	0.534	10.288	2.52	0.364	0.0
DNMT3A-r1-Pongo_abelii	0.534	10.289	2.508	0.364	0.0
DNMT3A-r1-Pongo_pygmaeus	0.534	10.289	2.508	0.364	0.0
DNMT3A-r1-Propithecus_coquereli	0.533	10.294	2.46	0.345	0.018
DNMT3A-r1-Rhinopithecus_bieti	0.534	10.288	2.52	0.364	0.0
DNMT3A-r1-Rhinopithecus_roxellana	0.533	10.286	2.513	0.339	0.018
DNMT3A-r1-Saimiri_boliviensis	0.535	10.303	2.406	0.377	0.0
DNMT3A-r1-Sapajus_apella	0.535	10.303	2.406	0.377	0.0
DNMT3A-r1-Symphalangus_syndactylus	0.534	10.289	2.508	0.364	0.0
DNMT3A-r1-Theropithecus_gelada	0.534	10.288	2.52	0.364	0.0
DNMT3A-r1-Trachypithecus_francoisi	0.533	10.286	2.513	0.339	0.018
DNMT3B-r0-Aotus_nancymaae	0.491	10.019	4.237	0.318	-0.04
DNMT3B-r0-Callithrix_jacchus	0.492	10.022	4.216	0.318	-0.04
DNMT3B-r0-Carlito_syrichta	0.494	10.023	4.205	0.315	-0.041
DNMT3B-r0-Cebus_imitator	0.49	10.015	4.264	0.318	-0.04
DNMT3B-r0-Cercocebus_atys	0.492	10.02	4.227	0.318	-0.04
DNMT3B-r0-Chlorocebus_sabaeus	0.498	10.021	4.23	0.312	-0.045
DNMT3B-r0-Colobus_angolensis_palliatus	0.492	10.019	4.236	0.318	-0.04
DNMT3B-r0-Gorilla_gorilla_gorilla	0.491	10.015	4.272	0.309	-0.04
DNMT3B-r0-Homo_sapiens	0.491	10.015	4.272	0.309	-0.04
DNMT3B-r0-Hylobates_moloch	0.493	10.019	4.242	0.314	-0.045
DNMT3B-r0-Lemur_catta	0.497	10.026	4.203	0.32	-0.05
DNMT3B-r0-Macaca_fascicularis	0.493	10.022	4.21	0.318	-0.04
DNMT3B-r0-Macaca_mulatta	0.493	10.022	4.21	0.318	-0.04
DNMT3B-r0-Macaca_nemestrina	0.492	10.02	4.23	0.318	-0.04
DNMT3B-r0-Macaca_thibetana_thibetana	0.491	10.018	4.245	0.318	-0.04
DNMT3B-r0-Mandrillus_leucophaeus	0.488	10.017	4.245	0.314	-0.036
DNMT3B-r0-Microcebus_murinus	0.494	10.018	4.252	0.321	-0.045
DNMT3B-r0-Nomascus_leucogenys	0.513	10.065	4.036	0.304	-0.083
DNMT3B-r0-Nycticebus_coucang	0.494	10.019	4.243	0.319	-0.035
DNMT3B-r0-Otolemur_garnettii	0.498	10.02	4.246	0.316	-0.049
DNMT3B-r0-Pan_paniscus	0.491	10.015	4.272	0.309	-0.04
DNMT3B-r0-Pan_troglodytes	0.491	10.015	4.272	0.309	-0.04
DNMT3B-r0-Papio_anubis	0.492	10.021	4.224	0.318	-0.04
DNMT3B-r0-Piliocolobus_tephrosceles	0.489	10.017	4.248	0.323	-0.036
DNMT3B-r0-Pongo_abelii	0.491	10.014	4.277	0.309	-0.04
DNMT3B-r0-Pongo_pygmaeus	0.491	10.014	4.277	0.309	-0.04
DNMT3B-r0-Propithecus_coquereli	0.501	10.035	4.143	0.324	-0.049
DNMT3B-r0-Rhinopithecus_bieti	0.492	10.02	4.231	0.318	-0.04
DNMT3B-r0-Rhinopithecus_roxellana	0.492	10.02	4.231	0.318	-0.04
DNMT3B-r0-Saimiri_boliviensis	0.491	10.019	4.238	0.318	-0.04
DNMT3B-r0-Symphalangus_syndactylus	0.489	10.006	4.334	0.305	-0.036
DNMT3B-r0-Theropithecus_gelada	0.492	10.02	4.227	0.318	-0.04
DNMT3B-r0-Trachypithecus_francoisi	0.492	10.02	4.231	0.318	-0.04
DNMT3B-r1-Aotus_nancymaae	0.507	10.096	3.65	0.344	0.047
DNMT3B-r1-Callithrix_jacchus	0.518	10.122	3.494	0.311	-0.009
DNMT3B-r1-Carlito_syrichta	0.519	10.135	3.434	0.362	0.076
DNMT3B-r1-Cebus_imitator	0.518	10.122	3.497	0.311	-0.009
DNMT3B-r1-Cercocebus_atys	0.506	10.092	3.677	0.333	0.048
DNMT3B-r1-Chlorocebus_sabaeus	0.494	10.095	3.641	0.341	0.033
DNMT3B-r1-Colobus_angolensis_palliatus	0.506	10.092	3.677	0.333	0.048
DNMT3B-r1-Gorilla_gorilla_gorilla	0.511	10.089	3.72	0.325	0.056
DNMT3B-r1-Homo_sapiens	0.506	10.092	3.677	0.333	0.048
DNMT3B-r1-Hylobates_moloch	0.517	10.121	3.503	0.311	-0.009
DNMT3B-r1-Lemur_catta	0.513	10.119	3.513	0.327	-0.019
DNMT3B-r1-Macaca_fascicularis	0.506	10.092	3.677	0.333	0.048
DNMT3B-r1-Macaca_mulatta	0.517	10.121	3.503	0.311	-0.009
DNMT3B-r1-Macaca_nemestrina	0.517	10.121	3.503	0.311	-0.009
DNMT3B-r1-Macaca_thibetana_thibetana	0.517	10.121	3.503	0.311	-0.009
DNMT3B-r1-Mandrillus_leucophaeus	0.506	10.092	3.677	0.333	0.048
DNMT3B-r1-Microcebus_murinus	0.51	10.106	3.601	0.336	0.0
DNMT3B-r1-Nomascus_leucogenys	0.517	10.121	3.503	0.311	-0.009
DNMT3B-r1-Nycticebus_coucang	0.519	10.127	3.458	0.311	-0.009
DNMT3B-r1-Otolemur_garnettii	0.518	10.12	3.507	0.302	-0.019
DNMT3B-r1-Pan_paniscus	0.506	10.092	3.677	0.333	0.048
DNMT3B-r1-Pan_troglodytes	0.506	10.092	3.677	0.333	0.048
DNMT3B-r1-Papio_anubis	0.517	10.121	3.503	0.311	-0.009
DNMT3B-r1-Piliocolobus_tephrosceles	0.519	10.125	3.47	0.311	-0.009
DNMT3B-r1-Pongo_abelii	0.506	10.092	3.677	0.333	0.048
DNMT3B-r1-Pongo_pygmaeus	0.506	10.092	3.677	0.333	0.048
DNMT3B-r1-Propithecus_coquereli	0.492	10.086	3.705	0.339	0.032
DNMT3B-r1-Rhinopithecus_bieti	0.517	10.121	3.503	0.311	-0.009
DNMT3B-r1-Rhinopithecus_roxellana	0.517	10.121	3.503	0.311	-0.009
DNMT3B-r1-Saimiri_boliviensis	0.52	10.129	3.452	0.305	-0.019
DNMT3B-r1-Symphalangus_syndactylus	0.506	10.092	3.677	0.333	0.048
DNMT3B-r1-Theropithecus_gelada	0.506	10.092	3.677	0.333	0.048
DNMT3B-r1-Trachypithecus_francoisi	0.517	10.121	3.503	0.311	-0.009
DNMT3L-r0-Aotus_nancymaae	0.582	10.397	2.299	0.2	-0.133
DNMT3L-r0-Chlorocebus_sabaeus	0.594	10.435	2.139	0.233	-0.167
DNMT3L-r0-Colobus_angolensis_palliatus	0.593	10.426	2.166	0.226	-0.161
DNMT3L-r0-Gorilla_gorilla_gorilla	0.594	10.432	2.158	0.233	-0.167
DNMT3L-r0-Homo_sapiens	0.594	10.432	2.158	0.233	-0.167
DNMT3L-r0-Hylobates_moloch	0.601	10.448	2.144	0.258	-0.194
DNMT3L-r0-Macaca_nemestrina	0.594	10.435	2.139	0.233	-0.167
DNMT3L-r0-Macaca_thibetana_thibetana	0.592	10.423	2.185	0.226	-0.161
DNMT3L-r0-Mandrillus_leucophaeus	0.593	10.426	2.166	0.226	-0.161
DNMT3L-r0-Nomascus_leucogenys	0.601	10.448	2.144	0.258	-0.194
DNMT3L-r0-Pan_paniscus	0.594	10.432	2.158	0.233	-0.167
DNMT3L-r0-Piliocolobus_tephrosceles	0.591	10.413	2.25	0.219	-0.156
DNMT3L-r0-Pongo_abelii	0.592	10.423	2.185	0.226	-0.161
DNMT3L-r0-Pongo_pygmaeus	0.592	10.423	2.185	0.226	-0.161
DNMT3L-r0-Rhinopithecus_bieti	0.593	10.426	2.166	0.226	-0.161
DNMT3L-r0-Rhinopithecus_roxellana	0.593	10.426	2.166	0.226	-0.161
DNMT3L-r0-Symphalangus_syndactylus	0.601	10.448	2.144	0.258	-0.194
DNMT3L-r0-Theropithecus_gelada	0.594	10.435	2.139	0.233	-0.167
GATAD2A-r0-Aotus_nancymaae	0.529	10.13	3.428	0.328	-0.036
GATAD2A-r0-Callithrix_jacchus	0.528	10.124	3.473	0.328	-0.036
GATAD2A-r0-Carlito_syrichta	0.528	10.126	3.457	0.331	-0.037
GATAD2A-r0-Cebus_imitator	0.531	10.129	3.443	0.321	-0.044
GATAD2A-r0-Cercocebus_atys	0.528	10.125	3.459	0.328	-0.036
GATAD2A-r0-Chlorocebus_sabaeus	0.528	10.126	3.452	0.328	-0.036
GATAD2A-r0-Colobus_angolensis_palliatus	0.528	10.123	3.474	0.328	-0.036
GATAD2A-r0-Gorilla_gorilla_gorilla	0.527	10.122	3.486	0.328	-0.036
GATAD2A-r0-Homo_sapiens	0.527	10.121	3.493	0.328	-0.036
GATAD2A-r0-Hylobates_moloch	0.513	10.029	4.178	0.28	-0.017
GATAD2A-r0-Lemur_catta	0.528	10.117	3.525	0.321	-0.037
GATAD2A-r0-Macaca_fascicularis	0.528	10.125	3.462	0.328	-0.036
GATAD2A-r0-Macaca_mulatta	0.527	10.121	3.489	0.328	-0.036
GATAD2A-r0-Macaca_nemestrina	0.528	10.125	3.459	0.328	-0.036
GATAD2A-r0-Macaca_thibetana_thibetana	0.528	10.125	3.459	0.328	-0.036
GATAD2A-r0-Mandrillus_leucophaeus	0.528	10.125	3.459	0.328	-0.036
GATAD2A-r0-Microcebus_murinus	0.526	10.117	3.523	0.333	-0.037
GATAD2A-r0-Nomascus_leucogenys	0.51	10.025	4.199	0.292	-0.004
GATAD2A-r0-Nycticebus_coucang	0.532	10.136	3.393	0.331	-0.045
GATAD2A-r0-Otolemur_garnettii	0.53	10.132	3.43	0.331	-0.045
GATAD2A-r0-Pan_paniscus	0.528	10.124	3.47	0.328	-0.036
GATAD2A-r0-Pan_troglodytes	0.528	10.124	3.47	0.328	-0.036
GATAD2A-r0-Papio_anubis	0.527	10.122	3.482	0.328	-0.036
GATAD2A-r0-Piliocolobus_tephrosceles	0.528	10.125	3.459	0.328	-0.036
GATAD2A-r0-Pongo_abelii	0.528	10.125	3.464	0.328	-0.036
GATAD2A-r0-Pongo_pygmaeus	0.528	10.125	3.464	0.328	-0.036
GATAD2A-r0-Propithecus_coquereli	0.525	10.119	3.504	0.346	-0.03
GATAD2A-r0-Rhinopithecus_bieti	0.528	10.125	3.459	0.328	-0.036
GATAD2A-r0-Rhinopithecus_roxellana	0.528	10.125	3.459	0.328	-0.036
GATAD2A-r0-Saimiri_boliviensis	0.529	10.129	3.433	0.328	-0.036
GATAD2A-r0-Sapajus_apella	0.528	10.123	3.479	0.328	-0.036
GATAD2A-r0-Symphalangus_syndactylus	0.527	10.122	3.486	0.328	-0.036
GATAD2A-r0-Theropithecus_gelada	0.527	10.122	3.482	0.328	-0.036
GATAD2A-r0-Trachypithecus_francoisi	0.529	10.128	3.442	0.328	-0.036
GATAD2A-r1-Aotus_nancymaae	0.538	10.048	4.126	0.113	0.064
GATAD2A-r1-Callithrix_jacchus	0.538	10.049	4.119	0.113	0.064
GATAD2A-r1-Carlito_syrichta	0.539	10.049	4.134	0.127	0.069
GATAD2A-r1-Cebus_imitator	0.538	10.049	4.12	0.113	0.064
GATAD2A-r1-Cercocebus_atys	0.538	10.048	4.129	0.113	0.064
GATAD2A-r1-Chlorocebus_sabaeus	0.538	10.048	4.125	0.113	0.064
GATAD2A-r1-Colobus_angolensis_palliatus	0.538	10.047	4.133	0.113	0.064
GATAD2A-r1-Gorilla_gorilla_gorilla	0.538	10.047	4.135	0.113	0.064
GATAD2A-r1-Homo_sapiens	0.538	10.047	4.131	0.113	0.064
GATAD2A-r1-Hylobates_moloch	0.538	10.048	4.127	0.113	0.064
GATAD2A-r1-Lemur_catta	0.539	10.045	4.163	0.127	0.069
GATAD2A-r1-Macaca_fascicularis	0.538	10.048	4.127	0.113	0.064
GATAD2A-r1-Macaca_mulatta	0.538	10.048	4.127	0.113	0.064
GATAD2A-r1-Macaca_nemestrina	0.538	10.048	4.127	0.113	0.064
GATAD2A-r1-Macaca_thibetana_thibetana	0.538	10.047	4.132	0.113	0.064
GATAD2A-r1-Mandrillus_leucophaeus	0.53	9.978	4.735	0.139	0.064
GATAD2A-r1-Microcebus_murinus	0.539	10.047	4.154	0.127	0.069
GATAD2A-r1-Nomascus_leucogenys	0.538	10.048	4.127	0.113	0.064
GATAD2A-r1-Nycticebus_coucang	0.539	10.048	4.146	0.127	0.069
GATAD2A-r1-Otolemur_garnettii	0.538	10.044	4.153	0.113	0.064
GATAD2A-r1-Pan_paniscus	0.538	10.047	4.131	0.113	0.064
GATAD2A-r1-Pan_troglodytes	0.538	10.047	4.131	0.113	0.064
GATAD2A-r1-Papio_anubis	0.538	10.048	4.127	0.113	0.064
GATAD2A-r1-Piliocolobus_tephrosceles	0.538	10.047	4.131	0.113	0.064
GATAD2A-r1-Pongo_abelii	0.538	10.048	4.127	0.113	0.064
GATAD2A-r1-Pongo_pygmaeus	0.538	10.048	4.127	0.113	0.064
GATAD2A-r1-Propithecus_coquereli	0.539	10.046	4.16	0.127	0.069
GATAD2A-r1-Rhinopithecus_bieti	0.538	10.047	4.131	0.113	0.064
GATAD2A-r1-Rhinopithecus_roxellana	0.538	10.047	4.131	0.113	0.064
GATAD2A-r1-Saimiri_boliviensis	0.538	10.05	4.114	0.113	0.064
GATAD2A-r1-Sapajus_apella	0.538	10.049	4.116	0.113	0.064
GATAD2A-r1-Symphalangus_syndactylus	0.528	10.024	4.209	0.118	0.039
GATAD2A-r1-Theropithecus_gelada	0.539	10.051	4.125	0.127	0.069
GATAD2A-r1-Trachypithecus_francoisi	0.538	10.047	4.131	0.113	0.064
GATAD2A-r2-Aotus_nancymaae	0.541	10.067	4.084	0.188	0.097
GATAD2A-r2-Callithrix_jacchus	0.541	10.067	4.079	0.188	0.097
GATAD2A-r2-Carlito_syrichta	0.542	10.071	4.053	0.188	0.097
GATAD2A-r2-Cebus_imitator	0.542	10.07	4.065	0.188	0.097
GATAD2A-r2-Cercocebus_atys	0.545	10.09	3.859	0.163	0.085
GATAD2A-r2-Chlorocebus_sabaeus	0.542	10.068	4.076	0.188	0.097
GATAD2A-r2-Colobus_angolensis_palliatus	0.542	10.07	4.062	0.188	0.097
GATAD2A-r2-Gorilla_gorilla_gorilla	0.542	10.069	4.07	0.188	0.097
GATAD2A-r2-Homo_sapiens	0.542	10.069	4.069	0.187	0.097
GATAD2A-r2-Hylobates_moloch	0.542	10.069	4.067	0.187	0.097
GATAD2A-r2-Lemur_catta	0.541	10.066	4.087	0.187	0.097
GATAD2A-r2-Macaca_fascicularis	0.542	10.069	4.071	0.188	0.097
GATAD2A-r2-Macaca_mulatta	0.542	10.069	4.071	0.188	0.097
GATAD2A-r2-Macaca_nemestrina	0.542	10.069	4.071	0.188	0.097
GATAD2A-r2-Macaca_thibetana_thibetana	0.542	10.069	4.071	0.188	0.097
GATAD2A-r2-Microcebus_murinus	0.542	10.069	4.067	0.187	0.097
GATAD2A-r2-Nomascus_leucogenys	0.542	10.069	4.067	0.187	0.097
GATAD2A-r2-Nycticebus_coucang	0.541	10.066	4.09	0.187	0.097
GATAD2A-r2-Otolemur_garnettii	0.541	10.067	4.082	0.187	0.097
GATAD2A-r2-Pan_paniscus	0.542	10.071	4.057	0.187	0.097
GATAD2A-r2-Pan_troglodytes	0.541	10.068	4.072	0.187	0.097
GATAD2A-r2-Papio_anubis	0.542	10.069	4.071	0.188	0.097
GATAD2A-r2-Piliocolobus_tephrosceles	0.542	10.07	4.062	0.188	0.097
GATAD2A-r2-Pongo_abelii	0.542	10.07	4.065	0.188	0.097
GATAD2A-r2-Pongo_pygmaeus	0.542	10.07	4.065	0.188	0.097
GATAD2A-r2-Propithecus_coquereli	0.542	10.069	4.065	0.187	0.097
GATAD2A-r2-Rhinopithecus_bieti	0.542	10.07	4.065	0.188	0.097
GATAD2A-r2-Rhinopithecus_roxellana	0.542	10.07	4.065	0.188	0.097
GATAD2A-r2-Saimiri_boliviensis	0.542	10.07	4.06	0.188	0.097
GATAD2A-r2-Sapajus_apella	0.542	10.071	4.054	0.188	0.097
GATAD2A-r2-Symphalangus_syndactylus	0.542	10.069	4.067	0.187	0.097
GATAD2A-r2-Theropithecus_gelada	0.542	10.069	4.071	0.188	0.097
GATAD2A-r2-Trachypithecus_francoisi	0.542	10.07	4.065	0.188	0.097
GATAD2B-r0-Aotus_nancymaae	0.535	10.164	3.265	0.31	-0.024
GATAD2B-r0-Callithrix_jacchus	0.535	10.164	3.265	0.31	-0.024
GATAD2B-r0-Carlito_syrichta	0.535	10.163	3.272	0.31	-0.024
GATAD2B-r0-Cebus_imitator	0.535	10.164	3.265	0.31	-0.024
GATAD2B-r0-Cercocebus_atys	0.52	10.107	3.601	0.324	-0.009
GATAD2B-r0-Chlorocebus_sabaeus	0.535	10.164	3.265	0.31	-0.024
GATAD2B-r0-Colobus_angolensis_palliatus	0.535	10.164	3.265	0.31	-0.024
GATAD2B-r0-Gorilla_gorilla_gorilla	0.535	10.163	3.269	0.31	-0.024
GATAD2B-r0-Homo_sapiens	0.535	10.164	3.265	0.31	-0.024
GATAD2B-r0-Hylobates_moloch	0.531	10.159	3.291	0.325	-0.012
GATAD2B-r0-Lemur_catta	0.534	10.16	3.29	0.31	-0.024
GATAD2B-r0-Macaca_fascicularis	0.535	10.164	3.265	0.31	-0.024
GATAD2B-r0-Macaca_mulatta	0.535	10.164	3.265	0.31	-0.024
GATAD2B-r0-Macaca_nemestrina	0.535	10.164	3.265	0.31	-0.024
GATAD2B-r0-Macaca_thibetana_thibetana	0.535	10.164	3.265	0.31	-0.024
GATAD2B-r0-Mandrillus_leucophaeus	0.533	10.161	3.282	0.329	-0.024
GATAD2B-r0-Microcebus_murinus	0.534	10.161	3.281	0.31	-0.024
GATAD2B-r0-Nomascus_leucogenys	0.531	10.159	3.291	0.325	-0.012
GATAD2B-r0-Nycticebus_coucang	0.532	10.152	3.342	0.31	-0.024
GATAD2B-r0-Otolemur_garnettii	0.525	10.139	3.448	0.278	0.028
GATAD2B-r0-Pan_paniscus	0.535	10.164	3.265	0.31	-0.024
GATAD2B-r0-Pan_troglodytes	0.535	10.164	3.265	0.31	-0.024
GATAD2B-r0-Papio_anubis	0.535	10.164	3.265	0.31	-0.024
GATAD2B-r0-Piliocolobus_tephrosceles	0.535	10.164	3.265	0.31	-0.024
GATAD2B-r0-Pongo_abelii	0.535	10.164	3.265	0.31	-0.024
GATAD2B-r0-Pongo_pygmaeus	0.535	10.164	3.265	0.31	-0.024
GATAD2B-r0-Propithecus_coquereli	0.565	10.349	2.445	0.294	-0.059
GATAD2B-r0-Rhinopithecus_bieti	0.535	10.162	3.275	0.31	-0.024
GATAD2B-r0-Rhinopithecus_roxellana	0.535	10.162	3.275	0.31	-0.024
GATAD2B-r0-Saimiri_boliviensis	0.535	10.164	3.265	0.31	-0.024
GATAD2B-r0-Sapajus_apella	0.535	10.164	3.265	0.31	-0.024
GATAD2B-r0-Symphalangus_syndactylus	0.531	10.159	3.291	0.325	-0.012
GATAD2B-r0-Theropithecus_gelada	0.535	10.164	3.265	0.31	-0.024
GATAD2B-r1-Aotus_nancymaae	0.537	10.048	4.06	0.098	0.059
GATAD2B-r1-Callithrix_jacchus	0.537	10.048	4.06	0.098	0.059
GATAD2B-r1-Carlito_syrichta	0.537	10.047	4.067	0.099	0.059
GATAD2B-r1-Cebus_imitator	0.537	10.048	4.06	0.098	0.059
GATAD2B-r1-Cercocebus_atys	0.537	10.049	4.055	0.099	0.059
GATAD2B-r1-Chlorocebus_sabaeus	0.537	10.047	4.066	0.098	0.059
GATAD2B-r1-Colobus_angolensis_palliatus	0.537	10.048	4.06	0.098	0.059
GATAD2B-r1-Gorilla_gorilla_gorilla	0.537	10.048	4.06	0.098	0.059
GATAD2B-r1-Homo_sapiens	0.537	10.048	4.06	0.098	0.059
GATAD2B-r1-Hylobates_moloch	0.537	10.048	4.06	0.098	0.059
GATAD2B-r1-Lemur_catta	0.537	10.049	4.055	0.099	0.059
GATAD2B-r1-Macaca_fascicularis	0.537	10.048	4.06	0.098	0.059
GATAD2B-r1-Macaca_mulatta	0.537	10.048	4.06	0.098	0.059
GATAD2B-r1-Macaca_nemestrina	0.537	10.048	4.06	0.098	0.059
GATAD2B-r1-Macaca_thibetana_thibetana	0.537	10.048	4.06	0.098	0.059
GATAD2B-r1-Mandrillus_leucophaeus	0.537	10.048	4.06	0.098	0.059
GATAD2B-r1-Microcebus_murinus	0.537	10.048	4.06	0.098	0.059
GATAD2B-r1-Nomascus_leucogenys	0.537	10.048	4.06	0.098	0.059
GATAD2B-r1-Nycticebus_coucang	0.537	10.05	4.048	0.098	0.059
GATAD2B-r1-Otolemur_garnettii	0.54	10.08	3.812	0.096	0.058
GATAD2B-r1-Pan_paniscus	0.537	10.048	4.06	0.098	0.059
GATAD2B-r1-Pan_troglodytes	0.537	10.048	4.06	0.098	0.059
GATAD2B-r1-Papio_anubis	0.537	10.048	4.06	0.098	0.059
GATAD2B-r1-Piliocolobus_tephrosceles	0.537	10.048	4.06	0.098	0.059
GATAD2B-r1-Pongo_abelii	0.537	10.048	4.06	0.098	0.059
GATAD2B-r1-Pongo_pygmaeus	0.537	10.048	4.06	0.098	0.059
GATAD2B-r1-Propithecus_coquereli	0.537	10.048	4.061	0.099	0.06
GATAD2B-r1-Rhinopithecus_bieti	0.537	10.048	4.06	0.098	0.059
GATAD2B-r1-Rhinopithecus_roxellana	0.537	10.048	4.06	0.098	0.059
GATAD2B-r1-Saimiri_boliviensis	0.537	10.048	4.06	0.098	0.059
GATAD2B-r1-Sapajus_apella	0.537	10.048	4.06	0.098	0.059
GATAD2B-r1-Symphalangus_syndactylus	0.537	10.048	4.06	0.098	0.059
GATAD2B-r1-Theropithecus_gelada	0.537	10.048	4.06	0.098	0.059
GATAD2B-r2-Aotus_nancymaae	0.535	10.046	4.045	0.126	0.054
GATAD2B-r2-Callithrix_jacchus	0.535	10.046	4.045	0.126	0.054
GATAD2B-r2-Carlito_syrichta	0.535	10.046	4.045	0.126	0.054
GATAD2B-r2-Cebus_imitator	0.535	10.046	4.045	0.126	0.054
GATAD2B-r2-Cercocebus_atys	0.535	10.046	4.045	0.126	0.054
GATAD2B-r2-Chlorocebus_sabaeus	0.535	10.046	4.045	0.126	0.054
GATAD2B-r2-Colobus_angolensis_palliatus	0.535	10.046	4.045	0.126	0.054
GATAD2B-r2-Gorilla_gorilla_gorilla	0.535	10.046	4.045	0.126	0.054
GATAD2B-r2-Homo_sapiens	0.535	10.046	4.045	0.126	0.054
GATAD2B-r2-Hylobates_moloch	0.535	10.046	4.045	0.126	0.054
GATAD2B-r2-Lemur_catta	0.536	10.05	4.017	0.126	0.054
GATAD2B-r2-Macaca_fascicularis	0.535	10.046	4.045	0.126	0.054
GATAD2B-r2-Macaca_mulatta	0.535	10.046	4.045	0.126	0.054
GATAD2B-r2-Macaca_nemestrina	0.535	10.046	4.045	0.126	0.054
GATAD2B-r2-Macaca_thibetana_thibetana	0.535	10.046	4.045	0.126	0.054
GATAD2B-r2-Mandrillus_leucophaeus	0.535	10.046	4.045	0.126	0.054
GATAD2B-r2-Microcebus_murinus	0.537	10.052	4.01	0.126	0.054
GATAD2B-r2-Nomascus_leucogenys	0.535	10.046	4.045	0.126	0.054
GATAD2B-r2-Nycticebus_coucang	0.536	10.048	4.034	0.126	0.054
GATAD2B-r2-Otolemur_garnettii	0.537	10.051	4.014	0.126	0.054
GATAD2B-r2-Pan_paniscus	0.535	10.046	4.044	0.126	0.054
GATAD2B-r2-Pan_troglodytes	0.535	10.046	4.044	0.126	0.054
GATAD2B-r2-Papio_anubis	0.535	10.046	4.045	0.126	0.054
GATAD2B-r2-Piliocolobus_tephrosceles	0.535	10.046	4.045	0.126	0.054
GATAD2B-r2-Pongo_abelii	0.535	10.046	4.045	0.126	0.054
GATAD2B-r2-Pongo_pygmaeus	0.535	10.046	4.045	0.126	0.054
GATAD2B-r2-Propithecus_coquereli	0.536	10.05	4.017	0.126	0.054
GATAD2B-r2-Rhinopithecus_bieti	0.535	10.046	4.045	0.126	0.054
GATAD2B-r2-Rhinopithecus_roxellana	0.535	10.046	4.045	0.126	0.054
GATAD2B-r2-Saimiri_boliviensis	0.535	10.046	4.045	0.126	0.054
GATAD2B-r2-Sapajus_apella	0.535	10.046	4.045	0.126	0.054
GATAD2B-r2-Symphalangus_syndactylus	0.535	10.046	4.045	0.126	0.054
GATAD2B-r2-Theropithecus_gelada	0.535	10.046	4.045	0.126	0.054
GTSF1L-r0-Homo_sapiens	0.498	10.11	3.506	0.284	-0.014
GTSF1L-r0-Pan_troglodytes	0.549	10.218	2.934	0.258	-0.079
GTSF1L-r0-Pan_paniscus	0.549	10.218	2.934	0.258	-0.079
GTSF1L-r0-Macaca_mulatta	0.544	10.21	2.989	0.298	-0.085
GTSF1L-r0-Papio_anubis	0.544	10.21	2.989	0.298	-0.085
GTSF1L-r0-Pongo_abelii	0.495	10.105	3.546	0.291	0.007
GTSF1L-r0-Pongo_pygmaeus	0.495	10.105	3.546	0.291	0.007
GTSF1L-r0-Nomascus_leucogenys	0.542	10.253	2.706	0.338	-0.044
GTSF1L-r0-Otolemur_garnettii	0.493	10.101	3.583	0.301	-0.007
GTSF1L-r0-Saimiri_boliviensis	0.558	10.297	2.6	0.328	-0.119
GTSF1L-r0-Gorilla_gorilla_gorilla	0.508	10.11	3.512	0.27	-0.014
GTSF1L-r0-Macaca_fascicularis	0.558	10.306	2.541	0.353	-0.118
GTSF1L-r0-Chlorocebus_sabaeus	0.558	10.305	2.549	0.353	-0.118
GTSF1L-r0-Rhinopithecus_roxellana	0.559	10.281	2.633	0.324	-0.088
GTSF1L-r0-Macaca_nemestrina	0.543	10.204	3.028	0.298	-0.085
GTSF1L-r0-Colobus_angolensis_palliatus	0.56	10.285	2.614	0.324	-0.088
GTSF1L-r0-Mandrillus_leucophaeus	0.553	10.294	2.54	0.362	-0.101
GTSF1L-r0-Cercocebus_atys	0.553	10.294	2.54	0.362	-0.101
GTSF1L-r0-Aotus_nancymaae	0.54	10.187	3.098	0.287	-0.034
GTSF1L-r0-Propithecus_coquereli	0.497	10.087	3.685	0.304	0.007
GTSF1L-r0-Microcebus_murinus	0.496	10.102	3.568	0.302	-0.02
GTSF1L-r0-Cebus_imitator	0.546	10.273	2.613	0.349	-0.032
GTSF1L-r0-Rhinopithecus_bieti	0.556	10.315	2.447	0.37	-0.074
GTSF1L-r0-Piliocolobus_tephrosceles	0.499	10.138	3.316	0.317	0.008
GTSF1L-r0-Theropithecus_gelada	0.558	10.303	2.56	0.353	-0.118
GTSF1L-r0-Hylobates_moloch	0.539	10.19	3.038	0.272	-0.054
GTSF1L-r0-Sapajus_apella	0.546	10.271	2.627	0.349	-0.032
GTSF1L-r0-Trachypithecus_francoisi	0.551	10.209	3.02	0.261	-0.087
GTSF1L-r0-Lemur_catta	0.491	10.101	3.572	0.297	-0.027
GTSF1L-r0-Macaca_thibetana_thibetana	0.543	10.198	3.051	0.287	-0.074
GTSF1L-r0-Symphalangus_syndactylus	0.542	10.262	2.66	0.353	-0.059
GTSF1-r1-Hylobates_moloch	0.524	10.099	3.644	0.241	-0.045
GTSF1-r1-Nomascus_leucogenys	0.529	10.105	3.622	0.234	-0.054
GTSF1-r1-Symphalangus_syndactylus	0.524	10.099	3.644	0.241	-0.045
GTSF1-r1-Aotus_nancymaae	0.527	10.098	3.666	0.234	-0.054
GTSF1-r1-Callithrix_jacchus	0.525	10.104	3.614	0.25	-0.036
GTSF1-r1-Carlito_syrichta	0.519	10.11	3.55	0.245	-0.045
GTSF1-r1-Cercocebus_atys	0.525	10.103	3.62	0.239	-0.044
GTSF1-r1-Chlorocebus_sabaeus	0.525	10.103	3.62	0.239	-0.044
GTSF1-r1-Colobus_angolensis_palliatus	0.526	10.103	3.619	0.237	-0.044
GTSF1-r1-Gorilla_gorilla_gorilla	0.525	10.103	3.62	0.239	-0.044
GTSF1-r1-Homo_sapiens	0.525	10.103	3.62	0.239	-0.044
GTSF1-r1-Lemur_catta	0.528	10.131	3.477	0.197	-0.039
GTSF1-r1-Macaca_fascicularis	0.525	10.103	3.62	0.239	-0.044
GTSF1-r1-Macaca_mulatta	0.525	10.103	3.618	0.241	-0.045
GTSF1-r1-Macaca_nemestrina	0.525	10.103	3.618	0.241	-0.045
GTSF1-r1-Macaca_thibetana_thibetana	0.525	10.103	3.618	0.241	-0.045
GTSF1-r1-Mandrillus_leucophaeus	0.526	10.104	3.612	0.239	-0.044
GTSF1-r1-Microcebus_murinus	0.525	10.1	3.64	0.223	-0.045
GTSF1-r1-Nycticebus_coucang	0.521	10.098	3.64	0.241	-0.027
GTSF1-r1-Otolemur_garnettii	0.521	10.098	3.64	0.241	-0.027
GTSF1-r1-Pan_paniscus	0.525	10.103	3.62	0.239	-0.044
GTSF1-r1-Pan_troglodytes	0.526	10.082	3.791	0.234	-0.056
GTSF1-r1-Papio_anubis	0.525	10.103	3.618	0.241	-0.045
GTSF1-r1-Piliocolobus_tephrosceles	0.526	10.103	3.617	0.239	-0.044
GTSF1-r1-Pongo_abelii	0.525	10.103	3.62	0.239	-0.044
GTSF1-r1-Pongo_pygmaeus	0.526	10.082	3.791	0.234	-0.056
GTSF1-r1-Propithecus_coquereli	0.544	10.164	3.345	0.169	0.034
GTSF1-r1-Rhinopithecus_bieti	0.525	10.102	3.626	0.237	-0.044
GTSF1-r1-Rhinopithecus_roxellana	0.525	10.103	3.62	0.239	-0.044
GTSF1-r1-Saimiri_boliviensis	0.524	10.101	3.635	0.241	-0.045
GTSF1-r1-Sapajus_apella	0.524	10.1	3.641	0.241	-0.045
GTSF1-r1-Theropithecus_gelada	0.525	10.103	3.62	0.239	-0.044
GTSF1-r1-Trachypithecus_francoisi	0.525	10.103	3.62	0.239	-0.044
HDAC1-r0-Homo_sapiens	0.54	10.371	2.289	0.557	-0.142
HDAC1-r0-Macaca_mulatta	0.54	10.372	2.286	0.557	-0.142
HDAC1-r0-Pan_paniscus	0.54	10.372	2.286	0.557	-0.142
HDAC1-r0-Papio_anubis	0.54	10.372	2.286	0.557	-0.142
HDAC1-r0-Macaca_fascicularis	0.54	10.372	2.286	0.557	-0.142
HDAC1-r0-Chlorocebus_sabaeus	0.54	10.372	2.286	0.557	-0.142
HDAC1-r0-Rhinopithecus_roxellana	0.54	10.372	2.286	0.557	-0.142
HDAC1-r0-Macaca_nemestrina	0.54	10.372	2.286	0.557	-0.142
HDAC1-r0-Cercocebus_atys	0.54	10.372	2.286	0.557	-0.142
HDAC1-r0-Pan_troglodytes	0.54	10.372	2.286	0.557	-0.142
HDAC1-r0-Trachypithecus_francoisi	0.54	10.372	2.286	0.557	-0.142
HDAC1-r0-Macaca_thibetana_thibetana	0.54	10.372	2.286	0.557	-0.142
HDAC1-r0-Pongo_abelii	0.539	10.364	2.325	0.557	-0.142
HDAC1-r0-Pongo_pygmaeus	0.539	10.364	2.325	0.557	-0.142
HDAC1-r0-Callithrix_jacchus	0.54	10.372	2.282	0.557	-0.142
HDAC1-r0-Nomascus_leucogenys	0.536	10.349	2.367	0.536	-0.155
HDAC1-r0-Otolemur_garnettii	0.536	10.332	2.374	0.519	-0.148
HDAC1-r0-Saimiri_boliviensis	0.54	10.372	2.282	0.557	-0.142
HDAC1-r0-Cebus_imitator	0.54	10.372	2.282	0.557	-0.142
HDAC1-r0-Sapajus_apella	0.54	10.372	2.282	0.557	-0.142
HDAC1-r0-Gorilla_gorilla_gorilla	0.54	10.372	2.282	0.557	-0.142
HDAC1-r0-Carlito_syrichta	0.54	10.371	2.289	0.557	-0.142
HDAC1-r0-Colobus_angolensis_palliatus	0.539	10.367	2.313	0.557	-0.142
HDAC1-r0-Mandrillus_leucophaeus	0.54	10.371	2.287	0.557	-0.142
HDAC1-r0-Aotus_nancymaae	0.539	10.367	2.31	0.557	-0.142
HDAC1-r0-Propithecus_coquereli	0.541	10.374	2.273	0.557	-0.142
HDAC1-r0-Microcebus_murinus	0.54	10.373	2.281	0.557	-0.142
HDAC1-r0-Rhinopithecus_bieti	0.541	10.382	2.285	0.561	-0.153
HDAC1-r0-Piliocolobus_tephrosceles	0.539	10.367	2.313	0.557	-0.142
HDAC1-r0-Theropithecus_gelada	0.54	10.372	2.286	0.557	-0.142
HDAC1-r0-Hylobates_moloch	0.54	10.37	2.294	0.557	-0.142
HDAC1-r0-Lemur_catta	0.541	10.38	2.25	0.562	-0.143
HDAC1-r0-Nycticebus_coucang	0.54	10.371	2.289	0.557	-0.142
HDAC1-r0-Symphalangus_syndactylus	0.54	10.369	2.3	0.557	-0.142
HDAC2-r1-Callithrix_jacchus	0.537	10.295	2.539	0.523	-0.108
HDAC2-r1-Hylobates_moloch	0.537	10.295	2.539	0.523	-0.108
HDAC2-r1-Nomascus_leucogenys	0.537	10.295	2.539	0.523	-0.108
HDAC2-r1-Pan_paniscus	0.536	10.294	2.546	0.523	-0.108
HDAC2-r1-Pan_troglodytes	0.536	10.294	2.546	0.523	-0.108
HDAC2-r1-Pongo_pygmaeus	0.537	10.295	2.539	0.523	-0.108
HDAC2-r1-Symphalangus_syndactylus	0.537	10.295	2.539	0.523	-0.108
HDAC2-r1-Aotus_nancymaae	0.537	10.295	2.539	0.523	-0.108
HDAC2-r1-Carlito_syrichta	0.537	10.295	2.537	0.523	-0.108
HDAC2-r1-Cebus_imitator	0.536	10.294	2.542	0.523	-0.108
HDAC2-r1-Cercocebus_atys	0.537	10.295	2.539	0.523	-0.108
HDAC2-r1-Chlorocebus_sabaeus	0.537	10.295	2.539	0.523	-0.108
HDAC2-r1-Colobus_angolensis_palliatus	0.537	10.295	2.539	0.523	-0.108
HDAC2-r1-Gorilla_gorilla_gorilla	0.536	10.294	2.546	0.523	-0.108
HDAC2-r1-Homo_sapiens	0.536	10.294	2.546	0.523	-0.108
HDAC2-r1-Lemur_catta	0.537	10.296	2.528	0.523	-0.108
HDAC2-r1-Macaca_fascicularis	0.537	10.295	2.539	0.523	-0.108
HDAC2-r1-Macaca_mulatta	0.537	10.295	2.539	0.523	-0.108
HDAC2-r1-Macaca_nemestrina	0.537	10.295	2.539	0.523	-0.108
HDAC2-r1-Macaca_thibetana_thibetana	0.537	10.295	2.539	0.523	-0.108
HDAC2-r1-Mandrillus_leucophaeus	0.537	10.295	2.539	0.523	-0.108
HDAC2-r1-Microcebus_murinus	0.537	10.294	2.535	0.518	-0.107
HDAC2-r1-Nycticebus_coucang	0.537	10.296	2.532	0.523	-0.108
HDAC2-r1-Otolemur_garnettii	0.537	10.312	2.459	0.547	-0.113
HDAC2-r1-Papio_anubis	0.537	10.295	2.539	0.523	-0.108
HDAC2-r1-Piliocolobus_tephrosceles	0.536	10.294	2.546	0.523	-0.108
HDAC2-r1-Rhinopithecus_bieti	0.537	10.295	2.539	0.523	-0.108
HDAC2-r1-Rhinopithecus_roxellana	0.537	10.295	2.539	0.523	-0.108
HDAC2-r1-Saimiri_boliviensis	0.537	10.295	2.539	0.523	-0.108
HDAC2-r1-Sapajus_apella	0.536	10.294	2.542	0.523	-0.108
HDAC2-r1-Theropithecus_gelada	0.537	10.295	2.539	0.523	-0.108
HDAC2-r1-Trachypithecus_francoisi	0.537	10.295	2.539	0.523	-0.108
HNRNPC-r0-Homo_sapiens	0.325	10.055	3.053	0.451	-0.098
HNRNPC-r0-Pan_troglodytes	0.392	10.057	3.61	0.409	-0.074
HNRNPC-r0-Macaca_mulatta	0.392	10.057	3.61	0.409	-0.074
HNRNPC-r0-Pongo_abelii	0.392	10.057	3.61	0.409	-0.074
HNRNPC-r0-Nomascus_leucogenys	0.392	10.057	3.61	0.409	-0.074
HNRNPC-r0-Pan_paniscus	0.392	10.057	3.61	0.409	-0.074
HNRNPC-r0-Papio_anubis	0.392	10.057	3.61	0.409	-0.074
HNRNPC-r0-Saimiri_boliviensis	0.392	10.057	3.61	0.409	-0.074
HNRNPC-r0-Macaca_fascicularis	0.392	10.057	3.61	0.409	-0.074
HNRNPC-r0-Chlorocebus_sabaeus	0.392	10.057	3.61	0.409	-0.074
HNRNPC-r0-Colobus_angolensis_palliatus	0.392	10.057	3.61	0.409	-0.074
HNRNPC-r0-Mandrillus_leucophaeus	0.392	10.057	3.61	0.409	-0.074
HNRNPC-r0-Rhinopithecus_bieti	0.392	10.057	3.61	0.409	-0.074
HNRNPC-r0-Piliocolobus_tephrosceles	0.392	10.057	3.61	0.409	-0.074
HNRNPC-r0-Theropithecus_gelada	0.392	10.057	3.61	0.409	-0.074
HNRNPC-r0-Hylobates_moloch	0.392	10.057	3.61	0.409	-0.074
HNRNPC-r0-Trachypithecus_francoisi	0.392	10.057	3.61	0.409	-0.074
HNRNPC-r0-Macaca_thibetana_thibetana	0.392	10.057	3.61	0.409	-0.074
HNRNPC-r0-Pongo_pygmaeus	0.392	10.057	3.61	0.409	-0.074
HNRNPC-r0-Callithrix_jacchus	0.389	10.038	3.812	0.396	-0.065
HNRNPC-r0-Aotus_nancymaae	0.389	10.038	3.812	0.396	-0.065
HNRNPC-r0-Sapajus_apella	0.389	10.038	3.812	0.396	-0.065
HNRNPC-r0-Otolemur_garnettii	0.407	10.06	3.669	0.402	-0.062
HNRNPC-r0-Carlito_syrichta	0.397	10.057	3.617	0.396	-0.065
HNRNPC-r0-Macaca_nemestrina	0.392	10.057	3.61	0.409	-0.074
HNRNPC-r0-Cercocebus_atys	0.402	10.104	3.255	0.382	0.0
HNRNPC-r0-Propithecus_coquereli	0.393	10.056	3.627	0.407	-0.074
HNRNPC-r0-Microcebus_murinus	0.393	10.056	3.627	0.407	-0.074
HNRNPC-r0-Lemur_catta	0.393	10.056	3.627	0.407	-0.074
HNRNPC-r0-Nycticebus_coucang	0.392	10.054	3.645	0.406	-0.074
HNRNPC-r0-Symphalangus_syndactylus	0.4	10.056	3.669	0.401	-0.077
MBD2-r0-Homo_sapiens	0.5	9.942	5.195	0.246	0.088
MBD2-r0-Pan_troglodytes	0.5	9.942	5.195	0.246	0.088
MBD2-r0-Pongo_abelii	0.5	9.942	5.195	0.246	0.088
MBD2-r0-Nomascus_leucogenys	0.5	9.942	5.195	0.246	0.088
MBD2-r0-Pan_paniscus	0.5	9.942	5.195	0.246	0.088
MBD2-r0-Gorilla_gorilla_gorilla	0.5	9.942	5.195	0.246	0.088
MBD2-r0-Trachypithecus_francoisi	0.5	9.942	5.195	0.246	0.088
MBD2-r0-Pongo_pygmaeus	0.5	9.942	5.195	0.246	0.088
MBD2-r0-Symphalangus_syndactylus	0.5	9.942	5.195	0.246	0.088
MBD2-r0-Macaca_mulatta	0.5	9.941	5.208	0.246	0.088
MBD2-r0-Macaca_fascicularis	0.5	9.941	5.208	0.246	0.088
MBD2-r0-Chlorocebus_sabaeus	0.5	9.941	5.208	0.246	0.088
MBD2-r0-Theropithecus_gelada	0.5	9.941	5.208	0.246	0.088
MBD2-r0-Macaca_thibetana_thibetana	0.5	9.941	5.208	0.246	0.088
MBD2-r0-Callithrix_jacchus	0.5	9.943	5.185	0.244	0.087
MBD2-r0-Aotus_nancymaae	0.5	9.943	5.185	0.244	0.087
MBD2-r0-Otolemur_garnettii	0.517	10.02	4.329	0.241	0.075
MBD2-r0-Papio_anubis	0.489	9.927	5.036	0.245	0.051
MBD2-r0-Saimiri_boliviensis	0.499	9.939	5.235	0.241	0.086
MBD2-r0-Rhinopithecus_roxellana	0.5	9.941	5.205	0.246	0.088
MBD2-r0-Macaca_nemestrina	0.503	9.956	5.1	0.248	0.09
MBD2-r0-Colobus_angolensis_palliatus	0.522	10.053	4.02	0.237	0.075
MBD2-r0-Mandrillus_leucophaeus	0.517	10.032	4.191	0.245	0.069
MBD2-r0-Cercocebus_atys	0.505	9.953	5.076	0.251	0.092
MBD2-r0-Propithecus_coquereli	0.5	9.943	5.187	0.247	0.088
MBD2-r0-Microcebus_murinus	0.503	9.937	5.099	0.237	0.077
MBD2-r0-Cebus_imitator	0.499	9.945	5.222	0.246	0.089
MBD2-r0-Sapajus_apella	0.499	9.945	5.222	0.246	0.089
MBD2-r0-Rhinopithecus_bieti	0.505	9.979	4.615	0.236	0.051
MBD2-r0-Piliocolobus_tephrosceles	0.499	9.94	5.219	0.246	0.088
MBD2-r0-Hylobates_moloch	0.501	9.936	5.162	0.245	0.084
MBD2-r0-Lemur_catta	0.5	9.942	5.195	0.246	0.088
MBD2-r0-Nycticebus_coucang	0.499	9.936	5.191	0.244	0.085
MBD3-r0-Aotus_nancymaae	0.551	10.16	3.6	0.289	0.144
MBD3-r0-Callithrix_jacchus	0.531	10.071	4.074	0.308	0.113
MBD3-r0-Cebus_imitator	0.532	10.077	4.034	0.308	0.113
MBD3-r0-Cercocebus_atys	0.532	10.077	4.034	0.308	0.113
MBD3-r0-Chlorocebus_sabaeus	0.532	10.077	4.034	0.308	0.113
MBD3-r0-Colobus_angolensis_palliatus	0.543	10.144	3.638	0.29	0.13
MBD3-r0-Gorilla_gorilla_gorilla	0.532	10.077	4.034	0.308	0.113
MBD3-r0-Homo_sapiens	0.532	10.077	4.034	0.308	0.113
MBD3-r0-Hylobates_moloch	0.532	10.077	4.034	0.308	0.113
MBD3-r0-Lemur_catta	0.532	10.077	4.034	0.308	0.113
MBD3-r0-Macaca_fascicularis	0.532	10.077	4.034	0.308	0.113
MBD3-r0-Macaca_mulatta	0.532	10.077	4.034	0.308	0.113
MBD3-r0-Macaca_nemestrina	0.532	10.077	4.034	0.308	0.113
MBD3-r0-Macaca_thibetana_thibetana	0.532	10.077	4.034	0.308	0.113
MBD3-r0-Mandrillus_leucophaeus	0.55	10.2	3.202	0.303	0.118
MBD3-r0-Microcebus_murinus	0.532	10.077	4.034	0.308	0.113
MBD3-r0-Nomascus_leucogenys	0.532	10.077	4.034	0.308	0.113
MBD3-r0-Nycticebus_coucang	0.532	10.077	4.034	0.308	0.113
MBD3-r0-Otolemur_garnettii	0.55	10.2	3.202	0.303	0.118
MBD3-r0-Pan_paniscus	0.532	10.077	4.034	0.308	0.113
MBD3-r0-Pan_troglodytes	0.532	10.077	4.034	0.308	0.113
MBD3-r0-Pongo_abelii	0.532	10.077	4.034	0.308	0.113
MBD3-r0-Pongo_pygmaeus	0.532	10.077	4.034	0.308	0.113
MBD3-r0-Propithecus_coquereli	0.55	10.2	3.202	0.303	0.118
MBD3-r0-Rhinopithecus_bieti	0.554	10.159	3.621	0.31	0.15
MBD3-r0-Rhinopithecus_roxellana	0.532	10.077	4.034	0.308	0.113
MBD3-r0-Saimiri_boliviensis	0.532	10.077	4.034	0.308	0.113
MBD3-r0-Sapajus_apella	0.532	10.077	4.034	0.308	0.113
MBD3-r0-Symphalangus_syndactylus	0.532	10.077	4.034	0.308	0.113
MBD3-r0-Theropithecus_gelada	0.532	10.077	4.034	0.308	0.113
MBD3-r0-Trachypithecus_francoisi	0.532	10.077	4.034	0.308	0.113
MBD3-r1-Aotus_nancymaae	0.652	11.062	1.031	0.629	-0.571
MBD3-r1-Callithrix_jacchus	0.606	10.904	1.136	0.686	-0.514
MBD3-r1-Cebus_imitator	0.651	11.055	1.046	0.629	-0.571
MBD3-r1-Cercocebus_atys	0.652	11.058	1.038	0.629	-0.571
MBD3-r1-Chlorocebus_sabaeus	0.652	11.062	1.03	0.629	-0.571
MBD3-r1-Colobus_angolensis_palliatus	0.652	11.058	1.038	0.629	-0.571
MBD3-r1-Gorilla_gorilla_gorilla	0.653	11.069	1.012	0.629	-0.571
MBD3-r1-Homo_sapiens	0.653	11.069	1.012	0.629	-0.571
MBD3-r1-Hylobates_moloch	0.653	11.066	1.02	0.629	-0.571
MBD3-r1-Lemur_catta	0.636	11.004	1.116	0.618	-0.559
MBD3-r1-Macaca_fascicularis	0.652	11.058	1.038	0.629	-0.571
MBD3-r1-Macaca_mulatta	0.652	11.058	1.038	0.629	-0.571
MBD3-r1-Macaca_nemestrina	0.652	11.058	1.038	0.629	-0.571
MBD3-r1-Macaca_thibetana_thibetana	0.652	11.058	1.038	0.629	-0.571
MBD3-r1-Mandrillus_leucophaeus	0.652	11.058	1.038	0.629	-0.571
MBD3-r1-Microcebus_murinus	0.637	11.007	1.108	0.618	-0.559
MBD3-r1-Nomascus_leucogenys	0.653	11.069	1.012	0.629	-0.571
MBD3-r1-Nycticebus_coucang	0.633	10.984	1.089	0.606	-0.545
MBD3-r1-Otolemur_garnettii	0.607	10.889	1.094	0.645	-0.516
MBD3-r1-Pan_paniscus	0.653	11.069	1.012	0.629	-0.571
MBD3-r1-Pan_troglodytes	0.653	11.069	1.012	0.629	-0.571
MBD3-r1-Pongo_abelii	0.628	11.037	0.989	0.676	-0.559
MBD3-r1-Pongo_pygmaeus	0.628	11.037	0.989	0.676	-0.559
MBD3-r1-Propithecus_coquereli	0.636	10.995	1.156	0.618	-0.559
MBD3-r1-Rhinopithecus_bieti	0.652	11.062	1.03	0.629	-0.571
MBD3-r1-Rhinopithecus_roxellana	0.652	11.062	1.03	0.629	-0.571
MBD3-r1-Saimiri_boliviensis	0.652	11.058	1.039	0.629	-0.571
MBD3-r1-Sapajus_apella	0.651	11.055	1.046	0.629	-0.571
MBD3-r1-Symphalangus_syndactylus	0.653	11.066	1.02	0.629	-0.571
MBD3-r1-Theropithecus_gelada	0.652	11.058	1.038	0.629	-0.571
MBD3-r1-Trachypithecus_francoisi	0.652	11.058	1.038	0.629	-0.571
MBD3-r1-Piliocolobus_tephrosceles	0.652	11.058	1.038	0.629	-0.571
METTL14-r0-Aotus_nancymaae	0.524	10.191	3.056	0.442	-0.105
METTL14-r0-Callithrix_jacchus	0.524	10.19	3.061	0.442	-0.105
METTL14-r0-Carlito_syrichta	0.525	10.194	3.032	0.442	-0.105
METTL14-r0-Cebus_imitator	0.524	10.19	3.061	0.442	-0.105
METTL14-r0-Cercocebus_atys	0.526	10.192	3.062	0.448	-0.115
METTL14-r0-Chlorocebus_sabaeus	0.523	10.189	3.07	0.442	-0.105
METTL14-r0-Colobus_angolensis_palliatus	0.526	10.192	3.062	0.448	-0.115
METTL14-r0-Gorilla_gorilla_gorilla	0.526	10.193	3.056	0.448	-0.115
METTL14-r0-Homo_sapiens	0.526	10.193	3.056	0.448	-0.115
METTL14-r0-Hylobates_moloch	0.526	10.193	3.056	0.448	-0.115
METTL14-r0-Lemur_catta	0.524	10.191	3.06	0.442	-0.105
METTL14-r0-Macaca_fascicularis	0.526	10.192	3.062	0.448	-0.115
METTL14-r0-Macaca_mulatta	0.526	10.192	3.062	0.448	-0.115
METTL14-r0-Macaca_nemestrina	0.526	10.192	3.062	0.448	-0.115
METTL14-r0-Macaca_thibetana_thibetana	0.526	10.192	3.062	0.448	-0.115
METTL14-r0-Mandrillus_leucophaeus	0.526	10.192	3.062	0.448	-0.115
METTL14-r0-Microcebus_murinus	0.566	10.35	2.63	0.459	-0.189
METTL14-r0-Nomascus_leucogenys	0.526	10.193	3.056	0.448	-0.115
METTL14-r0-Nycticebus_coucang	0.529	10.203	3.002	0.454	-0.124
METTL14-r0-Otolemur_garnettii	0.529	10.201	3.011	0.454	-0.124
METTL14-r0-Pan_paniscus	0.526	10.193	3.056	0.448	-0.115
METTL14-r0-Pan_troglodytes	0.526	10.193	3.056	0.448	-0.115
METTL14-r0-Papio_anubis	0.526	10.192	3.062	0.448	-0.115
METTL14-r0-Piliocolobus_tephrosceles	0.526	10.192	3.062	0.448	-0.115
METTL14-r0-Pongo_abelii	0.526	10.193	3.056	0.448	-0.115
METTL14-r0-Pongo_pygmaeus	0.526	10.193	3.056	0.448	-0.115
METTL14-r0-Rhinopithecus_roxellana	0.526	10.192	3.062	0.448	-0.115
METTL14-r0-Saimiri_boliviensis	0.524	10.19	3.061	0.442	-0.105
METTL14-r0-Sapajus_apella	0.524	10.19	3.061	0.442	-0.105
METTL14-r0-Symphalangus_syndactylus	0.526	10.193	3.056	0.448	-0.115
METTL14-r0-Theropithecus_gelada	0.526	10.192	3.062	0.448	-0.115
METTL14-r0-Trachypithecus_francoisi	0.523	10.189	3.07	0.442	-0.105
METTL14-r1-Aotus_nancymaae	0.581	10.103	4.183	0.312	0.219
METTL14-r1-Callithrix_jacchus	0.581	10.1	4.196	0.312	0.219
METTL14-r1-Carlito_syrichta	0.578	10.1	4.19	0.338	0.215
METTL14-r1-Cebus_imitator	0.581	10.103	4.183	0.312	0.219
METTL14-r1-Cercocebus_atys	0.581	10.103	4.183	0.312	0.219
METTL14-r1-Chlorocebus_sabaeus	0.581	10.103	4.183	0.312	0.219
METTL14-r1-Colobus_angolensis_palliatus	0.578	10.1	4.19	0.338	0.215
METTL14-r1-Gorilla_gorilla_gorilla	0.581	10.103	4.183	0.312	0.219
METTL14-r1-Homo_sapiens	0.581	10.103	4.183	0.312	0.219
METTL14-r1-Hylobates_moloch	0.581	10.103	4.183	0.312	0.219
METTL14-r1-Lemur_catta	0.581	10.103	4.183	0.312	0.219
METTL14-r1-Macaca_fascicularis	0.581	10.103	4.183	0.312	0.219
METTL14-r1-Macaca_mulatta	0.581	10.103	4.183	0.312	0.219
METTL14-r1-Macaca_nemestrina	0.581	10.103	4.183	0.312	0.219
METTL14-r1-Macaca_thibetana_thibetana	0.581	10.103	4.183	0.312	0.219
METTL14-r1-Mandrillus_leucophaeus	0.581	10.103	4.183	0.312	0.219
METTL14-r1-Microcebus_murinus	0.581	10.103	4.183	0.312	0.219
METTL14-r1-Nomascus_leucogenys	0.581	10.103	4.183	0.312	0.219
METTL14-r1-Nycticebus_coucang	0.581	10.103	4.183	0.312	0.219
METTL14-r1-Otolemur_garnettii	0.593	10.117	4.208	0.333	0.238
METTL14-r1-Pan_paniscus	0.581	10.103	4.183	0.312	0.219
METTL14-r1-Pan_troglodytes	0.581	10.103	4.183	0.312	0.219
METTL14-r1-Papio_anubis	0.581	10.103	4.183	0.312	0.219
METTL14-r1-Piliocolobus_tephrosceles	0.581	10.103	4.183	0.312	0.219
METTL14-r1-Pongo_abelii	0.581	10.103	4.183	0.312	0.219
METTL14-r1-Pongo_pygmaeus	0.581	10.103	4.183	0.312	0.219
METTL14-r1-Rhinopithecus_roxellana	0.581	10.101	4.194	0.312	0.219
METTL14-r1-Saimiri_boliviensis	0.581	10.103	4.183	0.312	0.219
METTL14-r1-Sapajus_apella	0.581	10.103	4.183	0.312	0.219
METTL14-r1-Symphalangus_syndactylus	0.581	10.103	4.183	0.312	0.219
METTL14-r1-Theropithecus_gelada	0.581	10.103	4.183	0.312	0.219
METTL14-r1-Trachypithecus_francoisi	0.581	10.103	4.183	0.312	0.219
METTL14-r1-Propithecus_coquereli	0.581	10.103	4.183	0.312	0.219
METTL14-r1-Rhinopithecus_bieti	0.565	10.088	4.161	0.318	0.197
METTL3-r0-Aotus_nancymaae	0.537	10.218	2.852	0.296	0.0
METTL3-r0-Callithrix_jacchus	0.538	10.219	2.85	0.293	0.0
METTL3-r0-Carlito_syrichta	0.536	10.211	2.909	0.289	0.0
METTL3-r0-Cebus_imitator	0.538	10.219	2.854	0.293	0.0
METTL3-r0-Cercocebus_atys	0.537	10.214	2.885	0.289	0.0
METTL3-r0-Chlorocebus_sabaeus	0.537	10.214	2.885	0.289	0.0
METTL3-r0-Colobus_angolensis_palliatus	0.537	10.218	2.856	0.296	0.0
METTL3-r0-Gorilla_gorilla_gorilla	0.537	10.216	2.874	0.289	0.0
METTL3-r0-Homo_sapiens	0.538	10.219	2.853	0.293	0.0
METTL3-r0-Hylobates_moloch	0.538	10.221	2.838	0.293	0.0
METTL3-r0-Lemur_catta	0.537	10.217	2.867	0.293	0.0
METTL3-r0-Macaca_fascicularis	0.537	10.214	2.885	0.289	0.0
METTL3-r0-Macaca_mulatta	0.537	10.214	2.885	0.289	0.0
METTL3-r0-Macaca_nemestrina	0.537	10.214	2.885	0.289	0.0
METTL3-r0-Macaca_thibetana_thibetana	0.537	10.214	2.885	0.289	0.0
METTL3-r0-Mandrillus_leucophaeus	0.537	10.213	2.895	0.289	0.0
METTL3-r0-Microcebus_murinus	0.537	10.217	2.867	0.293	0.0
METTL3-r0-Nomascus_leucogenys	0.538	10.219	2.853	0.293	0.0
METTL3-r0-Nycticebus_coucang	0.538	10.217	2.862	0.286	0.0
METTL3-r0-Otolemur_garnettii	0.537	10.211	2.906	0.286	0.0
METTL3-r0-Pan_paniscus	0.537	10.214	2.888	0.293	0.0
METTL3-r0-Pan_troglodytes	0.538	10.219	2.853	0.293	0.0
METTL3-r0-Papio_anubis	0.537	10.214	2.885	0.289	0.0
METTL3-r0-Piliocolobus_tephrosceles	0.537	10.218	2.856	0.296	0.0
METTL3-r0-Pongo_abelii	0.537	10.219	2.845	0.296	0.0
METTL3-r0-Pongo_pygmaeus	0.537	10.219	2.845	0.296	0.0
METTL3-r0-Propithecus_coquereli	0.537	10.214	2.889	0.289	0.0
METTL3-r0-Rhinopithecus_bieti	0.537	10.218	2.856	0.296	0.0
METTL3-r0-Rhinopithecus_roxellana	0.537	10.218	2.856	0.296	0.0
METTL3-r0-Saimiri_boliviensis	0.537	10.215	2.881	0.289	0.0
METTL3-r0-Sapajus_apella	0.537	10.219	2.846	0.296	0.0
METTL3-r0-Symphalangus_syndactylus	0.537	10.218	2.858	0.293	0.0
METTL3-r0-Theropithecus_gelada	0.537	10.214	2.885	0.289	0.0
METTL3-r0-Trachypithecus_francoisi	0.537	10.215	2.883	0.293	0.0
METTL3-r1-Aotus_nancymaae	0.531	10.164	3.272	0.288	0.041
METTL3-r1-Callithrix_jacchus	0.531	10.164	3.272	0.288	0.041
METTL3-r1-Cebus_imitator	0.53	10.16	3.303	0.288	0.041
METTL3-r1-Cercocebus_atys	0.531	10.164	3.272	0.288	0.041
METTL3-r1-Chlorocebus_sabaeus	0.532	10.166	3.262	0.288	0.041
METTL3-r1-Colobus_angolensis_palliatus	0.531	10.164	3.272	0.288	0.041
METTL3-r1-Gorilla_gorilla_gorilla	0.531	10.164	3.272	0.288	0.041
METTL3-r1-Homo_sapiens	0.531	10.164	3.272	0.288	0.041
METTL3-r1-Hylobates_moloch	0.531	10.164	3.272	0.288	0.041
METTL3-r1-Lemur_catta	0.532	10.167	3.254	0.288	0.041
METTL3-r1-Macaca_fascicularis	0.531	10.164	3.272	0.288	0.041
METTL3-r1-Macaca_mulatta	0.531	10.164	3.272	0.288	0.041
METTL3-r1-Macaca_nemestrina	0.531	10.164	3.272	0.288	0.041
METTL3-r1-Macaca_thibetana_thibetana	0.531	10.164	3.272	0.288	0.041
METTL3-r1-Mandrillus_leucophaeus	0.531	10.164	3.272	0.288	0.041
METTL3-r1-Microcebus_murinus	0.531	10.165	3.265	0.288	0.041
METTL3-r1-Nomascus_leucogenys	0.531	10.164	3.272	0.288	0.041
METTL3-r1-Nycticebus_coucang	0.531	10.165	3.265	0.288	0.041
METTL3-r1-Otolemur_garnettii	0.531	10.165	3.265	0.288	0.041
METTL3-r1-Pan_paniscus	0.531	10.164	3.272	0.288	0.041
METTL3-r1-Pan_troglodytes	0.531	10.164	3.272	0.288	0.041
METTL3-r1-Papio_anubis	0.531	10.164	3.272	0.288	0.041
METTL3-r1-Piliocolobus_tephrosceles	0.531	10.164	3.272	0.288	0.041
METTL3-r1-Pongo_abelii	0.531	10.164	3.272	0.288	0.041
METTL3-r1-Pongo_pygmaeus	0.531	10.164	3.272	0.288	0.041
METTL3-r1-Propithecus_coquereli	0.532	10.168	3.249	0.288	0.041
METTL3-r1-Rhinopithecus_bieti	0.531	10.164	3.272	0.288	0.041
METTL3-r1-Rhinopithecus_roxellana	0.531	10.164	3.272	0.288	0.041
METTL3-r1-Saimiri_boliviensis	0.531	10.163	3.283	0.288	0.041
METTL3-r1-Sapajus_apella	0.53	10.16	3.303	0.288	0.041
METTL3-r1-Symphalangus_syndactylus	0.522	10.074	3.808	0.212	0.008
METTL3-r1-Theropithecus_gelada	0.531	10.164	3.272	0.288	0.041
METTL3-r1-Trachypithecus_francoisi	0.531	10.164	3.272	0.288	0.041
MORC2-r0-Aotus_nancymaae	0.512	10.09	3.747	0.361	0.063
MORC2-r0-Callithrix_jacchus	0.512	10.094	3.744	0.358	0.067
MORC2-r0-Carlito_syrichta	0.513	10.095	3.704	0.356	0.064
MORC2-r0-Cebus_imitator	0.512	10.091	3.739	0.361	0.063
MORC2-r0-Cercocebus_atys	0.513	10.092	3.735	0.361	0.063
MORC2-r0-Chlorocebus_sabaeus	0.512	10.091	3.744	0.361	0.063
MORC2-r0-Colobus_angolensis_palliatus	0.511	10.085	3.79	0.362	0.063
MORC2-r0-Gorilla_gorilla_gorilla	0.512	10.09	3.754	0.361	0.063
MORC2-r0-Homo_sapiens	0.512	10.089	3.757	0.361	0.063
MORC2-r0-Hylobates_moloch	0.512	10.09	3.746	0.361	0.063
MORC2-r0-Lemur_catta	0.513	10.093	3.726	0.35	0.064
MORC2-r0-Macaca_fascicularis	0.512	10.091	3.737	0.361	0.063
MORC2-r0-Macaca_mulatta	0.512	10.091	3.738	0.361	0.063
MORC2-r0-Macaca_nemestrina	0.512	10.091	3.737	0.361	0.063
MORC2-r0-Macaca_thibetana_thibetana	0.512	10.091	3.737	0.361	0.063
MORC2-r0-Mandrillus_leucophaeus	0.513	10.092	3.735	0.361	0.063
MORC2-r0-Microcebus_murinus	0.514	10.093	3.721	0.35	0.064
MORC2-r0-Nomascus_leucogenys	0.512	10.088	3.763	0.361	0.063
MORC2-r0-Nycticebus_coucang	0.515	10.089	3.725	0.351	0.06
MORC2-r0-Otolemur_garnettii	0.516	10.085	3.723	0.356	0.056
MORC2-r0-Pan_paniscus	0.513	10.086	3.762	0.357	0.059
MORC2-r0-Pan_troglodytes	0.512	10.089	3.755	0.361	0.063
MORC2-r0-Papio_anubis	0.512	10.091	3.744	0.362	0.063
MORC2-r0-Piliocolobus_tephrosceles	0.512	10.089	3.761	0.362	0.063
MORC2-r0-Pongo_abelii	0.512	10.087	3.778	0.361	0.063
MORC2-r0-Pongo_pygmaeus	0.512	10.088	3.765	0.361	0.063
MORC2-r0-Propithecus_coquereli	0.512	10.089	3.759	0.356	0.064
MORC2-r0-Rhinopithecus_bieti	0.51	10.081	3.827	0.361	0.063
MORC2-r0-Rhinopithecus_roxellana	0.511	10.085	3.796	0.361	0.063
MORC2-r0-Saimiri_boliviensis	0.512	10.091	3.739	0.361	0.063
MORC2-r0-Sapajus_apella	0.513	10.093	3.721	0.361	0.063
MORC2-r0-Symphalangus_syndactylus	0.512	10.089	3.755	0.358	0.063
MORC2-r0-Theropithecus_gelada	0.512	10.091	3.737	0.361	0.063
MORC2-r0-Trachypithecus_francoisi	0.512	10.084	3.787	0.357	0.059
MORC2-r1-Aotus_nancymaae	0.567	10.292	2.655	0.339	-0.113
MORC2-r1-Callithrix_jacchus	0.56	10.277	2.709	0.358	-0.119
MORC2-r1-Carlito_syrichta	0.578	10.366	2.417	0.283	-0.17
MORC2-r1-Cebus_imitator	0.57	10.311	2.645	0.333	-0.143
MORC2-r1-Cercocebus_atys	0.566	10.334	2.479	0.381	-0.159
MORC2-r1-Chlorocebus_sabaeus	0.561	10.287	2.672	0.344	-0.125
MORC2-r1-Colobus_angolensis_palliatus	0.562	10.306	2.556	0.355	-0.129
MORC2-r1-Gorilla_gorilla_gorilla	0.566	10.299	2.655	0.323	-0.129
MORC2-r1-Homo_sapiens	0.562	10.293	2.636	0.344	-0.125
MORC2-r1-Hylobates_moloch	0.563	10.3	2.593	0.344	-0.125
MORC2-r1-Lemur_catta	0.563	10.283	2.66	0.324	-0.118
MORC2-r1-Macaca_fascicularis	0.562	10.296	2.613	0.349	-0.127
MORC2-r1-Macaca_mulatta	0.562	10.296	2.613	0.349	-0.127
MORC2-r1-Macaca_nemestrina	0.562	10.296	2.613	0.349	-0.127
MORC2-r1-Macaca_thibetana_thibetana	0.562	10.296	2.613	0.349	-0.127
MORC2-r1-Mandrillus_leucophaeus	0.565	10.311	2.564	0.365	-0.143
MORC2-r1-Microcebus_murinus	0.56	10.304	2.54	0.364	-0.121
MORC2-r1-Nomascus_leucogenys	0.563	10.3	2.593	0.344	-0.125
MORC2-r1-Nycticebus_coucang	0.57	10.317	2.651	0.308	-0.154
MORC2-r1-Otolemur_garnettii	0.573	10.34	2.54	0.323	-0.161
MORC2-r1-Pan_paniscus	0.562	10.293	2.636	0.344	-0.125
MORC2-r1-Pan_troglodytes	0.562	10.293	2.636	0.344	-0.125
MORC2-r1-Papio_anubis	0.565	10.311	2.564	0.365	-0.143
MORC2-r1-Piliocolobus_tephrosceles	0.57	10.31	2.654	0.302	-0.143
MORC2-r1-Pongo_abelii	0.561	10.291	2.648	0.344	-0.125
MORC2-r1-Pongo_pygmaeus	0.561	10.291	2.648	0.344	-0.125
MORC2-r1-Propithecus_coquereli	0.56	10.3	2.592	0.344	-0.125
MORC2-r1-Rhinopithecus_bieti	0.562	10.296	2.613	0.349	-0.127
MORC2-r1-Rhinopithecus_roxellana	0.562	10.296	2.613	0.349	-0.127
MORC2-r1-Saimiri_boliviensis	0.56	10.287	2.668	0.375	-0.125
MORC2-r1-Sapajus_apella	0.57	10.312	2.636	0.333	-0.143
MORC2-r1-Symphalangus_syndactylus	0.562	10.282	2.664	0.324	-0.118
MORC2-r1-Theropithecus_gelada	0.565	10.311	2.564	0.365	-0.143
MORC2-r1-Trachypithecus_francoisi	0.561	10.289	2.653	0.349	-0.127
MOV10L1-r0-Aotus_nancymaae	0.548	10.213	3.002	0.297	-0.054
MOV10L1-r0-Callithrix_jacchus	0.548	10.204	3.046	0.278	-0.051
MOV10L1-r0-Carlito_syrichta	0.525	10.184	3.109	0.333	0.012
MOV10L1-r0-Cebus_imitator	0.549	10.196	3.09	0.291	-0.058
MOV10L1-r0-Cercocebus_atys	0.549	10.213	3.055	0.27	-0.081
MOV10L1-r0-Chlorocebus_sabaeus	0.55	10.214	3.022	0.292	-0.069
MOV10L1-r0-Colobus_angolensis_palliatus	0.548	10.2	3.096	0.27	-0.054
MOV10L1-r0-Gorilla_gorilla_gorilla	0.547	10.211	2.99	0.288	-0.041
MOV10L1-r0-Homo_sapiens	0.547	10.211	2.99	0.288	-0.041
MOV10L1-r0-Hylobates_moloch	0.545	10.209	2.993	0.301	-0.027
MOV10L1-r0-Lemur_catta	0.537	10.165	3.25	0.253	-0.012
MOV10L1-r0-Macaca_fascicularis	0.549	10.202	3.08	0.278	-0.056
MOV10L1-r0-Macaca_mulatta	0.549	10.202	3.076	0.274	-0.055
MOV10L1-r0-Macaca_nemestrina	0.549	10.203	3.076	0.27	-0.054
[truncated: 2,223 more rows]

## Sheet: Table S4
Table S4. Domain composition of PIWI-containing proteins in eukaryotes
Entry	Proteome ID	Species	Phylum	Kingdom	Domain
					4Fe-4S ferredoxin-type	ABC transporter	ABC1 atypical kinase-like	Anaphase-promoting complex subunit 11 RING-H2 finger	AP2/ERF	Argonaute linker 1	Argonaute linker 2	BRCT	BTB	BZIP	C2H2-type	C3H1-type	CCHC-type	CMP/dCMP-type deaminase	CS	DEAD-box RNA helicase Q	DH	Dicer dsRNA-binding fold	DRBM	EF-hand	F-box	G-protein coupled receptors family 1 profile	GLUE N-terminal	GST C-terminal	H15	Helicase ATP-binding	Helicase C-terminal	HORMA	HTH CENPB-type	Ig-like	MADF	MCM	MSP	MYND-type	MYST-type HAT	N-acetyltransferase	NR LBD	Nuclear receptor	OTU	PARP catalytic	PAZ	PCI	Peptidase A1	PFU	Phytocyanin
A0A0M4EDH2	UP000494163	Drosophila busckii	Arthropoda	Metazoa	0	0	0	0	0	0	0	0	0	0	0	0	0	0	0	0	0	0	0	0	0	0	0	0	0	0	0	0	0	0	0	0	0	0	0	0	0	0	0	0	1	0	0	0	0
B4QL34	UP000000304	Drosophila simulans	Arthropoda	Metazoa	0	0	0	0	0	0	0	0	0	0	0	0	0	0	0	0	0	0	0	0	0	0	0	0	0	0	0	0	0	0	0	0	0	0	0	0	0	0	0	0	1	0	0	0	0
A0A0M5IYT6	UP000494163	Drosophila busckii	Arthropoda	Metazoa	0	0	0	0	0	0	0	0	0	0	0	0	0	0	0	0	0	0	0	0	0	0	0	0	0	0	0	0	0	0	0	0	0	0	0	0	0	0	0	0	1	0	0	0	0
A0A8J2R8E7	UP000789524	Danaus chrysippus	Arthropoda	Metazoa	0	0	0	0	0	0	0	0	0	0	0	0	0	0	0	0	0	0	0	0	0	0	0	0	0	0	0	0	0	0	0	0	0	0	0	0	0	0	0	0	1	0	0	0	0
A0A8J2QKC8	UP000789524	Danaus chrysippus	Arthropoda	Metazoa	0	0	0	0	0	0	0	0	0	0	0	0	0	0	0	0	0	0	0	0	0	0	0	0	0	0	0	0	0	0	0	0	0	0	0	0	0	0	0	0	1	0	0	0	0
A0A8J2VV89	UP000789524	Danaus chrysippus	Arthropoda	Metazoa	0	0	0	0	0	0	0	0	0	0	0	0	0	0	0	0	0	0	0	0	0	0	0	0	0	0	0	0	0	0	0	0	0	0	0	0	0	0	0	0	1	0	0	0	0
A0A8J2R029	UP000789524	Danaus chrysippus	Arthropoda	Metazoa	0	0	0	0	0	0	0	0	0	0	0	0	0	0	0	0	0	0	0	0	0	0	0	0	0	0	0	0	0	0	0	0	0	0	0	0	0	0	0	0	1	0	0	0	0
A0A8S3WSC3	UP000691718	Parnassius apollo	Arthropoda	Metazoa	0	0	0	0	0	0	0	0	0	0	0	0	0	0	0	0	0	0	0	0	0	0	0	0	0	0	0	0	0	0	0	0	0	0	0	0	0	0	0	0	1	0	0	0	0
A0A8S3XEC2	UP000691718	Parnassius apollo	Arthropoda	Metazoa	0	0	0	0	0	0	0	0	0	0	0	0	0	0	0	0	0	0	0	0	0	0	0	0	0	0	0	0	0	0	0	0	0	0	0	0	0	0	0	0	1	0	0	0	0
A0A8S3WQ91	UP000691718	Parnassius apollo	Arthropoda	Metazoa	0	0	0	0	0	0	0	0	0	0	0	0	0	0	0	0	0	0	0	0	0	0	0	0	0	0	0	0	0	0	0	0	0	0	0	0	0	0	0	0	1	0	0	0	0
A0A8S3WPQ0	UP000691718	Parnassius apollo	Arthropoda	Metazoa	0	0	0	0	0	0	0	0	0	0	0	0	0	0	0	0	0	0	0	0	0	0	0	0	0	0	0	0	0	0	0	0	0	0	0	0	0	0	0	0	1	0	0	0	0
A0A8S4BXD4	UP000677803	Menidia menidia	Chordata	Metazoa	0	0	0	0	0	0	0	0	0	0	0	0	0	0	0	0	0	0	0	0	0	0	0	0	0	0	0	0	0	0	0	0	0	0	0	0	0	0	0	0	1	0	0	0	0
A0A8S4B997	UP000677803	Menidia menidia	Chordata	Metazoa	0	0	0	0	0	0	0	0	0	0	0	0	0	0	0	0	0	0	0	0	0	0	0	0	0	0	0	0	0	0	0	0	0	0	0	0	0	0	0	0	0	0	0	0	0
A0A8S4BY77	UP000677803	Menidia menidia	Chordata	Metazoa	0	0	0	0	0	0	0	0	0	0	0	0	0	0	0	0	0	0	0	0	0	0	0	0	0	0	0	0	0	0	0	0	0	0	0	0	0	0	0	0	1	0	0	0	0
A0A8S4AXT5	UP000677803	Menidia menidia	Chordata	Metazoa	0	0	0	0	0	0	0	0	0	0	0	0	0	0	0	0	0	0	0	0	0	0	0	0	0	0	0	0	0	0	0	0	0	0	0	0	0	0	0	0	1	0	0	0	0
A0A8S4BET9	UP000677803	Menidia menidia	Chordata	Metazoa	0	0	0	0	0	0	0	0	0	0	0	0	0	0	0	0	0	0	0	0	0	0	0	0	0	0	0	0	0	0	0	0	0	0	0	0	0	0	0	0	0	0	0	0	0
A0A8S4G614	UP000653454	Plutella xylostella	Arthropoda	Metazoa	0	0	0	0	0	0	0	0	0	0	0	0	0	0	0	0	0	0	0	0	0	0	0	0	0	0	0	0	0	0	0	0	0	0	0	0	0	0	0	0	1	0	0	0	0
A0A8S4G484	UP000653454	Plutella xylostella	Arthropoda	Metazoa	0	0	0	0	0	0	0	0	0	0	0	0	0	0	0	0	0	0	0	0	0	0	0	0	0	0	0	0	0	0	0	0	0	0	0	0	0	0	0	0	1	0	0	0	0
A0A8S4E7B6	UP000653454	Plutella xylostella	Arthropoda	Metazoa	0	0	0	0	0	0	0	0	0	0	0	0	0	0	0	0	0	0	0	0	0	0	0	0	0	0	0	0	0	0	0	0	0	0	0	0	0	0	0	0	1	0	0	0	0
A0A8S4G4P3	UP000653454	Plutella xylostella	Arthropoda	Metazoa	0	0	0	0	0	0	0	0	0	0	0	0	0	0	0	0	0	0	0	0	0	0	0	0	0	0	0	0	0	0	0	0	0	0	0	0	0	0	0	0	1	0	0	0	0
A0A811Z6B6	UP000645828	Nyctereutes procyonoides	Chordata	Metazoa	0	0	0	0	0	0	0	0	0	0	0	0	0	0	0	0	0	0	0	0	0	0	0	0	0	0	0	0	0	0	0	0	0	0	0	0	0	0	0	0	1	0	0	0	0
A0A811YD67	UP000645828	Nyctereutes procyonoides	Chordata	Metazoa	0	0	0	0	0	0	0	0	0	0	0	0	0	0	0	0	0	0	0	0	0	0	0	0	0	0	0	0	0	0	0	0	0	0	0	0	0	0	0	0	1	0	0	0	0
A0A811Y9Y6	UP000645828	Nyctereutes procyonoides	Chordata	Metazoa	0	0	0	0	0	0	0	0	0	0	0	0	0	0	0	0	0	0	0	0	0	0	0	0	0	0	0	0	0	0	0	0	0	0	0	0	0	0	0	0	1	0	0	0	0
A0A811Y948	UP000645828	Nyctereutes procyonoides	Chordata	Metazoa	0	0	0	0	0	0	0	0	0	0	0	0	0	0	0	0	0	0	0	0	0	0	0	0	0	0	0	0	0	0	0	0	0	0	0	0	0	0	0	0	1	0	0	0	0
A0A811XQA5	UP000645828	Nyctereutes procyonoides	Chordata	Metazoa	0	0	0	0	0	0	0	0	0	0	0	0	0	0	0	0	0	0	0	0	0	0	0	0	0	0	0	0	0	0	0	0	0	0	0	0	0	0	0	0	0	0	0	0	0
Q4T9Y9	UP000007303	Tetraodon nigroviridis	Chordata	Metazoa	0	0	0	0	0	0	0	0	0	0	0	0	0	0	0	0	0	0	0	0	0	0	0	0	0	0	0	0	0	0	0	0	0	0	0	0	0	0	0	0	0	0	0	0	0
Q4SXU1	UP000007303	Tetraodon nigroviridis	Chordata	Metazoa	0	0	0	0	0	0	0	0	0	0	0	0	0	0	0	0	0	0	0	0	0	0	0	0	0	0	0	0	0	0	0	0	0	0	0	0	0	0	0	0	0	0	0	0	0
Q4S7L6	UP000007303	Tetraodon nigroviridis	Chordata	Metazoa	0	0	0	0	0	0	0	0	0	0	0	0	0	0	0	0	0	0	0	0	0	0	0	0	0	0	0	0	0	0	0	0	0	0	0	0	0	0	0	0	1	0	0	0	0
A0AA35P2P5	UP001178461	Podarcis lilfordi	Chordata	Metazoa	0	0	0	0	0	0	0	0	0	0	0	0	0	0	0	0	0	0	0	0	0	0	0	0	0	0	0	0	0	0	0	0	0	0	0	0	0	0	0	0	1	0	0	0	0
A0AA39H2K0	UP001175271	Steinernema hermaphroditum	Nematoda	Metazoa	0	0	1	0	0	0	0	0	0	0	0	0	0	0	0	0	0	0	0	0	0	0	0	0	0	0	0	0	0	0	0	0	0	0	0	0	0	0	0	0	0	0	0	0	0
A0A4D9F6I0	UP000297703	Platysternon megacephalum	Chordata	Metazoa	0	0	0	0	0	0	0	0	0	0	0	0	0	0	0	0	0	0	0	0	0	0	0	0	0	0	0	0	0	0	0	0	0	0	0	0	0	0	0	0	1	0	0	0	0
A0A084VYK5	UP000030765	Anopheles sinensis	Arthropoda	Metazoa	0	0	0	0	0	0	0	0	0	0	0	0	0	0	0	0	0	0	0	0	0	0	0	0	0	0	0	0	0	0	0	0	0	0	0	0	0	0	0	0	1	0	0	0	0
A0A084VPG5	UP000030765	Anopheles sinensis	Arthropoda	Metazoa	0	0	0	0	0	0	0	0	0	0	0	0	0	0	0	0	0	0	0	0	0	0	0	0	0	0	0	0	0	0	0	0	0	0	0	0	0	0	0	0	1	0	0	0	0
A0A084VRL4	UP000030765	Anopheles sinensis	Arthropoda	Metazoa	0	0	0	0	0	0	0	0	0	0	0	0	0	0	0	0	0	0	0	0	0	0	0	0	0	0	0	0	0	0	0	0	0	0	0	0	0	0	0	0	1	0	0	0	0
A0A084VGF5	UP000030765	Anopheles sinensis	Arthropoda	Metazoa	0	0	0	0	0	0	0	0	0	0	0	0	0	0	0	0	0	0	0	0	0	0	0	0	0	0	0	0	0	0	0	0	0	0	0	0	0	0	0	0	1	0	0	0	0
H2N806	UP000001595	Pongo abelii	Chordata	Metazoa	0	0	0	0	0	0	0	0	0	0	0	0	0	0	0	0	0	0	0	0	0	0	0	0	0	0	0	0	0	0	0	0	0	0	0	0	0	0	0	0	1	0	0	0	0
A0A8C5IUY4	UP000694408	Junco hyemalis	Chordata	Metazoa	0	0	0	0	0	0	0	0	0	0	0	0	0	0	0	0	0	0	0	0	0	0	0	0	0	0	0	0	0	0	0	0	0	0	0	0	0	0	0	0	1	0	0	0	0
A0A8D2MXM8	UP000694413	Zonotrichia albicollis	Chordata	Metazoa	0	0	0	0	0	0	0	0	0	0	0	0	0	0	0	0	0	0	0	0	0	0	0	0	0	0	0	0	0	0	0	0	0	0	0	0	0	0	0	0	1	0	0	0	0
A0A8T2K6F4	UP000812440	Hymenochirus boettgeri	Chordata	Metazoa	0	0	0	0	0	0	0	0	0	0	0	0	0	0	0	0	0	0	0	0	0	0	0	0	0	0	0	0	0	0	0	0	0	0	0	0	0	0	0	0	1	0	0	0	0
A0A7K9V047	UP000567872	Anseranas semipalmata	Chordata	Metazoa	0	0	0	0	0	0	0	0	0	0	0	0	0	0	0	0	0	0	0	0	0	0	0	0	0	0	0	0	0	0	0	0	0	0	0	0	0	0	0	0	1	0	0	0	0
A0A7L1I804	UP000586634	Nycticryphes semicollaris	Chordata	Metazoa	0	0	0	0	0	0	0	0	0	0	0	0	0	0	0	0	0	0	0	0	0	0	0	0	0	0	0	0	0	0	0	0	0	0	0	0	0	0	0	0	1	0	0	0	0
A0A7K7L3S7	UP000525565	Asarcornis scutulata	Chordata	Metazoa	0	0	0	0	0	0	0	0	0	0	0	0	0	0	0	0	0	0	0	0	0	0	0	0	0	0	0	0	0	0	0	0	0	0	0	0	0	0	0	0	1	0	0	0	0
A0A7L1SID1	UP000567570	Aramus guarauna	Chordata	Metazoa	0	0	0	0	0	0	0	0	0	0	0	0	0	0	0	0	0	0	0	0	0	0	0	0	0	0	0	0	0	0	0	0	0	0	0	0	0	0	0	0	1	0	0	0	0
A0A7L3TD70	UP000540089	Rissa tridactyla	Chordata	Metazoa	0	0	0	0	0	0	0	0	0	0	0	0	0	0	0	0	0	0	0	0	0	0	0	0	0	0	0	0	0	0	0	0	0	0	0	0	0	0	0	0	1	0	0	0	0
A0A7K7FMN2	UP000557271	Chionis minor	Chordata	Metazoa	0	0	0	0	0	0	0	0	0	0	0	0	0	0	0	0	0	0	0	0	0	0	0	0	0	0	0	0	0	0	0	0	0	0	0	0	0	0	0	0	1	0	0	0	0
A0A7K9TIQ9	UP000566440	Galbula dea	Chordata	Metazoa	0	0	0	0	0	0	0	0	0	0	0	0	0	0	0	0	0	0	0	0	0	0	0	0	0	0	0	0	0	0	0	0	0	0	0	0	0	0	0	0	1	0	0	0	0
A0A7K8P3H0	UP000525205	Cochlearius cochlearius	Chordata	Metazoa	0	0	0	0	0	0	0	0	0	0	0	0	0	0	0	0	0	0	0	0	0	0	0	0	0	0	0	0	0	0	0	0	0	0	0	0	0	0	0	0	1	0	0	0	0
A0A7L0RVZ7	UP000591073	Glaucidium brasilianum	Chordata	Metazoa	0	0	0	0	0	0	0	0	0	0	0	0	0	0	0	0	0	0	0	0	0	0	0	0	0	0	0	0	0	0	0	0	0	0	0	0	0	0	0	0	1	0	0	0	0
A0A7K4YHT7	UP000551127	Bucorvus abyssinicus	Chordata	Metazoa	0	0	0	0	0	0	0	0	0	0	0	0	0	0	0	0	0	0	0	0	0	0	0	0	0	0	0	0	0	0	0	0	0	0	0	0	0	0	0	0	1	0	0	0	0
A0A7K5G6R7	UP000541181	Chunga burmeisteri	Chordata	Metazoa	0	0	0	0	0	0	0	0	0	0	0	0	0	0	0	0	0	0	0	0	0	0	0	0	0	0	0	0	0	0	0	0	0	0	0	0	0	0	0	0	1	0	0	0	0
A0A851NSW0	UP000613066	Penelope pileata	Chordata	Metazoa	0	0	0	0	0	0	0	0	0	0	0	0	0	0	0	0	0	0	0	0	0	0	0	0	0	0	0	0	0	0	0	0	0	0	0	0	0	0	0	0	1	0	0	0	0
A0A7L0DHY8	UP000545435	Rostratula benghalensis	Chordata	Metazoa	0	0	0	0	0	0	0	0	0	0	0	0	0	0	0	0	0	0	0	0	0	0	0	0	0	0	0	0	0	0	0	0	0	0	0	0	0	0	0	0	1	0	0	0	0
A0A851YYS9	UP000648918	Halcyon senegalensis	Chordata	Metazoa	0	0	0	0	0	0	0	0	0	0	0	0	0	0	0	0	0	0	0	0	0	0	0	0	0	0	0	0	0	0	0	0	0	0	0	0	0	0	0	0	1	0	0	0	0
A0A7L3S1J5	UP000578766	Cepphus grylle	Chordata	Metazoa	0	0	0	0	0	0	0	0	0	0	0	0	0	0	0	0	0	0	0	0	0	0	0	0	0	0	0	0	0	0	0	0	0	0	0	0	0	0	0	0	1	0	0	0	0
A0A7L0GM48	UP000555649	Herpetotheres cachinnans	Chordata	Metazoa	0	0	0	0	0	0	0	0	0	0	0	0	0	0	0	0	0	0	0	0	0	0	0	0	0	0	0	0	0	0	0	0	0	0	0	0	0	0	0	0	1	0	0	0	0
A0A7K6RWW1	UP000570016	Rhynochetos jubatus	Chordata	Metazoa	0	0	0	0	0	0	0	0	0	0	0	0	0	0	0	0	0	0	0	0	0	0	0	0	0	0	0	0	0	0	0	0	0	0	0	0	0	0	0	0	1	0	0	0	0
A0A7L1JJ76	UP000525416	Rynchops niger	Chordata	Metazoa	0	0	0	0	0	0	0	0	0	0	0	0	0	0	0	0	0	0	0	0	0	0	0	0	0	0	0	0	0	0	0	0	0	0	0	0	0	0	0	0	1	0	0	0	0
A0A7K8JPA2	UP000533896	Lophotis ruficrista	Chordata	Metazoa	0	0	0	0	0	0	0	0	0	0	0	0	0	0	0	0	0	0	0	0	0	0	0	0	0	0	0	0	0	0	0	0	0	0	0	0	0	0	0	0	1	0	0	0	0
A0A7K9Z2D2	UP000522663	Odontophorus gujanensis	Chordata	Metazoa	0	0	0	0	0	0	0	0	0	0	0	0	0	0	0	0	0	0	0	0	0	0	0	0	0	0	0	0	0	0	0	0	0	0	0	0	0	0	0	0	1	0	0	0	0
A0A0M5J443	UP000494163	Drosophila busckii	Arthropoda	Metazoa	0	0	0	0	0	0	0	0	0	0	0	0	0	0	0	0	0	0	0	0	0	0	0	0	0	0	0	0	0	0	0	0	0	0	0	0	0	0	0	0	1	0	0	0	0
A0A8J9Z6R0	UP000838412	Branchiostoma lanceolatum	Chordata	Metazoa	0	0	0	0	0	0	0	0	0	0	0	0	0	0	0	0	0	0	0	0	0	0	0	0	0	0	0	0	0	0	0	0	0	0	0	0	0	0	0	0	1	0	0	0	0
A0A8J9ZD39	UP000838412	Branchiostoma lanceolatum	Chordata	Metazoa	0	0	0	0	0	1	0	0	0	0	0	0	0	0	0	0	0	0	0	0	0	0	0	0	0	0	0	0	0	0	0	0	0	0	0	0	0	0	0	0	1	0	0	0	0
A0A836K7D5	UP000669903	Acromyrmex charruanus	Arthropoda	Metazoa	0	0	0	0	0	0	0	0	0	0	0	0	0	0	0	0	0	0	0	0	0	0	0	0	0	0	0	0	0	0	0	0	0	0	0	0	0	0	0	0	1	0	0	0	0
A0A836FSI2	UP000668214	Pseudoatta argentina	Arthropoda	Metazoa	0	0	0	0	0	0	0	0	0	0	0	0	0	0	0	0	0	0	0	0	0	0	0	0	0	0	0	0	0	0	0	0	0	0	0	0	0	0	0	0	1	0	0	0	0
A0A836K1C9	UP000669903	Acromyrmex charruanus	Arthropoda	Metazoa	0	0	0	0	0	0	0	0	0	0	0	0	0	0	0	0	0	0	0	0	0	0	0	0	0	0	0	0	0	0	0	0	0	0	0	0	0	0	0	0	1	0	0	0	0
A0A836ELK5	UP000668214	Pseudoatta argentina	Arthropoda	Metazoa	0	0	0	0	0	0	0	0	0	0	0	0	0	0	0	0	0	0	0	0	0	0	0	0	0	0	0	0	0	0	0	0	0	0	0	0	0	0	0	0	1	0	0	0	0
A0A7K8KID1	UP000533896	Lophotis ruficrista	Chordata	Metazoa	0	0	0	0	0	0	0	0	0	0	0	0	0	0	0	0	0	0	0	0	0	0	0	0	0	0	0	0	0	0	0	0	0	0	0	0	0	0	0	0	0	0	0	0	0
A0A7L1HSM3	UP000586634	Nycticryphes semicollaris	Chordata	Metazoa	0	0	0	0	0	0	0	0	0	0	0	0	0	0	0	0	0	0	0	0	0	0	0	0	0	0	0	0	0	0	0	0	0	0	0	0	0	0	0	0	0	0	0	0	0
A0A7L0CUN2	UP000545435	Rostratula benghalensis	Chordata	Metazoa	0	0	0	0	0	0	0	0	0	0	0	0	0	0	0	0	0	0	0	0	0	0	0	0	0	0	0	0	0	0	0	0	0	0	0	0	0	0	0	0	0	0	0	0	0
A0A7K9YSA6	UP000522663	Odontophorus gujanensis	Chordata	Metazoa	0	0	0	0	0	0	0	0	0	0	0	0	0	0	0	0	0	0	0	0	0	0	0	0	0	0	0	0	0	0	0	0	0	0	0	0	0	0	0	0	0	0	0	0	0
A0A7K8P6T9	UP000525205	Cochlearius cochlearius	Chordata	Metazoa	0	0	0	0	0	0	0	0	0	0	0	0	0	0	0	0	0	0	0	0	0	0	0	0	0	0	0	0	0	0	0	0	0	0	0	0	0	0	0	0	0	0	0	0	0
A0A7K8KB80	UP000533896	Lophotis ruficrista	Chordata	Metazoa	0	0	0	0	0	0	0	0	0	0	0	0	0	0	0	0	0	0	0	0	0	0	0	0	0	0	0	0	0	0	0	0	0	0	0	0	0	0	0	0	1	0	0	0	0
A0A7K9THH8	UP000566440	Galbula dea	Chordata	Metazoa	0	0	0	0	0	0	0	0	0	0	0	0	0	0	0	0	0	0	0	0	0	0	0	0	0	0	0	0	0	0	0	0	0	0	0	0	0	0	0	0	1	0	0	0	0
A0A7K5G6X0	UP000541181	Chunga burmeisteri	Chordata	Metazoa	0	0	0	0	0	0	0	0	0	0	0	0	0	0	0	0	0	0	0	0	0	0	0	0	0	0	0	0	0	0	0	0	0	0	0	0	0	0	0	0	1	0	0	0	0
A0A7L1I815	UP000586634	Nycticryphes semicollaris	Chordata	Metazoa	0	0	0	0	0	0	0	0	0	0	0	0	0	0	0	0	0	0	0	0	0	0	0	0	0	0	0	0	0	0	0	0	0	0	0	0	0	0	0	0	1	0	0	0	0
A0A7L3RZS4	UP000578766	Cepphus grylle	Chordata	Metazoa	0	0	0	0	0	0	0	0	0	0	0	0	0	0	0	0	0	0	0	0	0	0	0	0	0	0	0	0	0	0	0	0	0	0	0	0	0	0	0	0	1	0	0	0	0
A0A7K9UZ68	UP000567872	Anseranas semipalmata	Chordata	Metazoa	0	0	0	0	0	0	0	0	0	0	0	0	0	0	0	0	0	0	0	0	0	0	0	0	0	0	0	0	0	0	0	0	0	0	0	0	0	0	0	0	1	0	0	0	0
A0A7L0GJD1	UP000555649	Herpetotheres cachinnans	Chordata	Metazoa	0	0	0	0	0	0	0	0	0	0	0	0	0	0	0	0	0	0	0	0	0	0	0	0	0	0	0	0	0	0	0	0	0	0	0	0	0	0	0	0	1	0	0	0	0
A0A7L0RUP1	UP000591073	Glaucidium brasilianum	Chordata	Metazoa	0	0	0	0	0	0	0	0	0	0	0	0	0	0	0	0	0	0	0	0	0	0	0	0	0	0	0	0	0	0	0	0	0	0	0	0	0	0	0	0	1	0	0	0	0
A0A7L0D7P5	UP000545435	Rostratula benghalensis	Chordata	Metazoa	0	0	0	0	0	0	0	0	0	0	0	0	0	0	0	0	0	0	0	0	0	0	0	0	0	0	0	0	0	0	0	0	0	0	0	0	0	0	0	0	1	0	0	0	0
A0A851NK64	UP000613066	Penelope pileata	Chordata	Metazoa	0	0	0	0	0	0	0	0	0	0	0	0	0	0	0	0	0	0	0	0	0	0	0	0	0	0	0	0	0	0	0	0	0	0	0	0	0	0	0	0	1	0	0	0	0
A0A7K4YHU9	UP000551127	Bucorvus abyssinicus	Chordata	Metazoa	0	0	0	0	0	0	0	0	0	0	0	0	0	0	0	0	0	0	0	0	0	0	0	0	0	0	0	0	0	0	0	0	0	0	0	0	0	0	0	0	1	0	0	0	0
A0A7K8JHI7	UP000533896	Lophotis ruficrista	Chordata	Metazoa	0	0	0	0	0	0	0	0	0	0	0	0	0	0	0	0	0	0	0	0	0	0	0	0	0	0	0	0	0	0	0	0	0	0	0	0	0	0	0	0	1	0	0	0	0
A0A7L3TAD5	UP000540089	Rissa tridactyla	Chordata	Metazoa	0	0	0	0	0	0	0	0	0	0	0	0	0	0	0	0	0	0	0	0	0	0	0	0	0	0	0	0	0	0	0	0	0	0	0	0	0	0	0	0	1	0	0	0	0
A0A7L1SNI7	UP000567570	Aramus guarauna	Chordata	Metazoa	0	0	0	0	0	0	0	0	0	0	0	0	0	0	0	0	0	0	0	0	0	0	0	0	0	0	0	0	0	0	0	0	0	0	0	0	0	0	0	0	1	0	0	0	0
A0A7K6RX59	UP000570016	Rhynochetos jubatus	Chordata	Metazoa	0	0	0	0	0	0	0	0	0	0	0	0	0	0	0	0	0	0	0	0	0	0	0	0	0	0	0	0	0	0	0	0	0	0	0	0	0	0	0	0	1	0	0	0	0
A0A7K8P3K4	UP000525205	Cochlearius cochlearius	Chordata	Metazoa	0	0	0	0	0	0	0	0	0	0	0	0	0	0	0	0	0	0	0	0	0	0	0	0	0	0	0	0	0	0	0	0	0	0	0	0	0	0	0	0	1	0	0	0	0
A0A851ZBY1	UP000648918	Halcyon senegalensis	Chordata	Metazoa	0	0	0	0	0	0	0	0	0	0	0	0	0	0	0	0	0	0	0	0	0	0	0	0	0	0	0	0	0	0	0	0	0	0	0	0	0	0	0	0	1	0	0	0	0
A0A7K7L4T8	UP000525565	Asarcornis scutulata	Chordata	Metazoa	0	0	0	0	0	0	0	0	0	0	0	0	0	0	0	0	0	0	0	0	0	0	0	0	0	0	0	0	0	0	0	0	0	0	0	0	0	0	0	0	1	0	0	0	0
A0A7K7FMU2	UP000557271	Chionis minor	Chordata	Metazoa	0	0	0	0	0	0	0	0	0	0	0	0	0	0	0	0	0	0	0	0	0	0	0	0	0	0	0	0	0	0	0	0	0	0	0	0	0	0	0	0	1	0	0	0	0
A0A7K9Z1C8	UP000522663	Odontophorus gujanensis	Chordata	Metazoa	0	0	0	0	0	0	0	0	0	0	0	0	0	0	0	0	0	0	0	0	0	0	0	0	0	0	0	0	0	0	0	0	0	0	0	0	0	0	0	0	1	0	0	0	0
A0A7L1JJ63	UP000525416	Rynchops niger	Chordata	Metazoa	0	0	0	0	0	0	0	0	0	0	0	0	0	0	0	0	0	0	0	0	0	0	0	0	0	0	0	0	0	0	0	0	0	0	0	0	0	0	0	0	1	0	0	0	0
A0A836KBX2	UP000669903	Acromyrmex charruanus	Arthropoda	Metazoa	0	0	0	0	0	0	0	0	0	0	0	0	0	0	0	0	0	0	0	0	0	0	0	0	0	0	0	0	0	0	0	0	0	0	0	0	0	0	0	0	1	0	0	0	0
A0A836JR00	UP000668214	Pseudoatta argentina	Arthropoda	Metazoa	0	0	0	0	0	0	0	0	0	0	0	0	0	0	0	0	0	0	0	0	0	0	0	0	0	0	0	0	0	0	0	0	0	0	0	0	0	0	0	0	1	0	0	0	0
A0A212EYG1	UP000007151	Danaus plexippus	Arthropoda	Metazoa	0	0	0	0	0	0	0	0	0	0	0	0	0	0	0	0	0	0	0	0	0	0	0	0	0	0	0	0	0	0	0	0	0	0	0	0	0	0	0	0	1	0	0	0	0
A0A7K4YHW5	UP000551127	Bucorvus abyssinicus	Chordata	Metazoa	0	0	0	0	0	0	0	0	0	0	0	0	0	0	0	0	0	0	0	0	0	0	0	0	0	0	0	0	0	0	0	0	0	0	0	0	0	0	0	0	1	0	0	0	0
A0A7K8P3C8	UP000525205	Cochlearius cochlearius	Chordata	Metazoa	0	0	0	0	0	0	0	0	0	0	0	0	0	0	0	0	0	0	0	0	0	0	0	0	0	0	0	0	0	0	0	0	0	0	0	0	0	0	0	0	1	0	0	0	0
A0A7L0GJG0	UP000555649	Herpetotheres cachinnans	Chordata	Metazoa	0	0	0	0	0	0	0	0	0	0	0	0	0	0	0	0	0	0	0	0	0	0	0	0	0	0	0	0	0	0	0	0	0	0	0	0	0	0	0	0	1	0	0	0	0
A0A7K7FMM5	UP000557271	Chionis minor	Chordata	Metazoa	0	0	0	0	0	0	0	0	0	0	0	0	0	0	0	0	0	0	0	0	0	0	0	0	0	0	0	0	0	0	0	0	0	0	0	0	0	0	0	0	1	0	0	0	0
A0A7K9Z078	UP000522663	Odontophorus gujanensis	Chordata	Metazoa	0	0	0	0	0	0	0	0	0	0	0	0	0	0	0	0	0	0	0	0	0	0	0	0	0	0	0	0	0	0	0	0	0	0	0	0	0	0	0	0	1	0	0	0	0
A0A7L3S1I3	UP000578766	Cepphus grylle	Chordata	Metazoa	0	0	0	0	0	0	0	0	0	0	0	0	0	0	0	0	0	0	0	0	0	0	0	0	0	0	0	0	0	0	0	0	0	0	0	0	0	0	0	0	1	0	0	0	0
A0A7K5G6P1	UP000541181	Chunga burmeisteri	Chordata	Metazoa	0	0	0	0	0	0	0	0	0	0	0	0	0	0	0	0	0	0	0	0	0	0	0	0	0	0	0	0	0	0	0	0	0	0	0	0	0	0	0	0	1	0	0	0	0
A0A851YUC0	UP000648918	Halcyon senegalensis	Chordata	Metazoa	0	0	0	0	0	0	0	0	0	0	0	0	0	0	0	0	0	0	0	0	0	0	0	0	0	0	0	0	0	0	0	0	0	0	0	0	0	0	0	0	1	0	0	0	0
A0A7L1I9M4	UP000586634	Nycticryphes semicollaris	Chordata	Metazoa	0	0	0	0	0	0	0	0	0	0	0	0	0	0	0	0	0	0	0	0	0	0	0	0	0	0	0	0	0	0	0	0	0	0	0	0	0	0	0	0	1	0	0	0	0
A0A7K7L462	UP000525565	Asarcornis scutulata	Chordata	Metazoa	0	0	0	0	0	0	0	0	0	0	0	0	0	0	0	0	0	0	0	0	0	0	0	0	0	0	0	0	0	0	0	0	0	0	0	0	0	0	0	0	1	0	0	0	0
A0A7L0SAC4	UP000591073	Glaucidium brasilianum	Chordata	Metazoa	0	0	0	0	0	0	0	0	0	0	0	0	0	0	0	0	0	0	0	0	0	0	0	0	0	0	0	0	0	0	0	0	0	0	0	0	0	0	0	0	1	0	0	0	0
A0A7K8JNB2	UP000533896	Lophotis ruficrista	Chordata	Metazoa	0	0	0	0	0	0	0	0	0	0	0	0	0	0	0	0	0	0	0	0	0	0	0	0	0	0	0	0	0	0	0	0	0	0	0	0	0	0	0	0	1	0	0	0	0
A0A7L3TD58	UP000540089	Rissa tridactyla	Chordata	Metazoa	0	0	0	0	0	0	0	0	0	0	0	0	0	0	0	0	0	0	0	0	0	0	0	0	0	0	0	0	0	0	0	0	0	0	0	0	0	0	0	0	1	0	0	0	0
A0A7K6RVL1	UP000570016	Rhynochetos jubatus	Chordata	Metazoa	0	0	0	0	0	0	0	0	0	0	0	0	0	0	0	0	0	0	0	0	0	0	0	0	0	0	0	0	0	0	0	0	0	0	0	0	0	0	0	0	1	0	0	0	0
A0A7L1JFF8	UP000525416	Rynchops niger	Chordata	Metazoa	0	0	0	0	0	0	0	0	0	0	0	0	0	0	0	0	0	0	0	0	0	0	0	0	0	0	0	0	0	0	0	0	0	0	0	0	0	0	0	0	1	0	0	0	0
A0A7L1SH24	UP000567570	Aramus guarauna	Chordata	Metazoa	0	0	0	0	0	0	0	0	0	0	0	0	0	0	0	0	0	0	0	0	0	0	0	0	0	0	0	0	0	0	0	0	0	0	0	0	0	0	0	0	1	0	0	0	0
A0A7K9THG2	UP000566440	Galbula dea	Chordata	Metazoa	0	0	0	0	0	0	0	0	0	0	0	0	0	0	0	0	0	0	0	0	0	0	0	0	0	0	0	0	0	0	0	0	0	0	0	0	0	0	0	0	1	0	0	0	0
A0A851NS62	UP000613066	Penelope pileata	Chordata	Metazoa	0	0	0	0	0	0	0	0	0	0	0	0	0	0	0	0	0	0	0	0	0	0	0	0	0	0	0	0	0	0	0	0	0	0	0	0	0	0	0	0	1	0	0	0	0
A0A7L0DLA3	UP000545435	Rostratula benghalensis	Chordata	Metazoa	0	0	0	0	0	0	0	0	0	0	0	0	0	0	0	0	0	0	0	0	0	0	0	0	0	0	0	0	0	0	0	0	0	0	0	0	0	0	0	0	1	0	0	0	0
A0A7K9UYN0	UP000567872	Anseranas semipalmata	Chordata	Metazoa	0	0	0	0	0	0	0	0	0	0	0	0	0	0	0	0	0	0	0	0	0	0	0	0	0	0	0	0	0	0	0	0	0	0	0	0	0	0	0	0	1	0	0	0	0
A0A2A6BFM5	UP000005239	Pristionchus pacificus	Nematoda	Metazoa	0	0	0	0	0	0	0	0	0	0	0	0	0	0	0	0	0	0	0	0	0	0	0	0	0	0	0	0	0	0	0	0	0	0	0	0	0	0	0	0	0	0	0	0	0
A0A4D9DTR3	UP000297703	Platysternon megacephalum	Chordata	Metazoa	0	0	0	0	0	0	0	0	0	0	0	0	0	0	0	0	0	0	0	0	0	0	0	0	0	0	0	0	0	0	0	0	0	0	0	0	0	0	0	0	1	0	0	0	0
A0A3M7S814	UP000276133	Brachionus plicatilis	Rotifera	Metazoa	0	0	0	0	0	0	0	0	0	0	0	0	0	0	0	0	0	0	0	0	0	0	0	0	0	0	0	0	0	0	0	0	0	0	0	0	0	0	0	0	1	0	0	0	0
A0A835CZC4	UP000639338	Aphidius gifuensis	Arthropoda	Metazoa	0	0	0	0	0	0	0	0	0	0	0	0	0	0	0	0	0	0	0	0	0	0	0	0	0	0	0	0	0	0	0	0	0	0	0	0	0	0	0	0	1	0	0	0	0
A0A8I6S9V5	UP000494040	Cimex lectularius	Arthropoda	Metazoa	0	0	0	0	0	0	0	0	0	0	0	0	0	0	0	0	0	0	0	0	0	0	0	0	0	0	0	0	0	0	0	0	0	0	0	0	0	0	0	0	1	0	0	0	0
A0A8I6SMM4	UP000494040	Cimex lectularius	Arthropoda	Metazoa	0	0	0	0	0	0	0	0	0	0	0	0	0	0	0	0	0	0	0	0	0	0	0	0	0	0	0	0	0	0	0	0	0	0	0	0	0	0	0	0	1	0	0	0	0
A0A7R9QPN8	UP000728032	Oppiella nova	Arthropoda	Metazoa	0	0	0	0	0	0	0	0	0	0	0	0	0	0	0	0	0	0	0	0	0	0	0	0	0	0	0	0	0	0	0	0	0	0	0	0	0	0	0	0	1	0	0	0	0
A0A8I6S989	UP000494040	Cimex lectularius	Arthropoda	Metazoa	0	0	0	0	0	0	0	0	0	0	0	0	0	0	0	0	0	0	0	0	0	0	0	0	0	0	0	0	0	0	0	0	0	0	0	0	0	0	0	0	1	0	0	0	0
A0A3M7SV03	UP000276133	Brachionus plicatilis	Rotifera	Metazoa	0	0	0	0	0	0	0	0	0	0	0	0	0	0	0	0	0	0	0	0	0	0	0	0	0	0	0	0	0	0	0	0	0	0	0	0	0	0	0	0	0	0	0	0	0
A0A3M7QU20	UP000276133	Brachionus plicatilis	Rotifera	Metazoa	0	0	0	0	0	0	0	0	0	0	0	0	0	0	0	0	0	0	0	0	0	0	0	0	0	0	0	0	0	0	0	0	0	0	0	0	0	0	0	0	1	0	0	0	0
G5ED77	UP000001940	Caenorhabditis elegans	Nematoda	Metazoa	0	0	0	0	0	0	0	0	0	0	0	0	0	0	0	0	0	0	0	0	0	0	0	0	0	0	0	0	0	0	0	0	0	0	0	0	0	0	0	0	1	0	0	0	0
A0A7R9KG90	UP000759131	Medioppia subpectinata	Arthropoda	Metazoa	0	0	0	0	0	0	0	0	0	0	0	0	0	0	0	0	0	0	0	0	0	0	0	0	0	0	0	0	0	0	0	0	0	0	0	0	0	0	0	0	1	0	0	0	0
A0A7R9LB03	UP000728032	Oppiella nova	Arthropoda	Metazoa	0	0	0	0	0	0	0	0	0	0	0	0	0	0	0	0	0	0	0	0	0	0	0	0	0	0	0	0	0	0	0	0	0	0	0	0	0	0	0	0	1	0	0	0	0
A0A7R8XKY0	UP000677054	Darwinula stevensoni	Arthropoda	Metazoa	0	0	0	0	0	0	0	0	0	0	0	0	0	0	0	0	0	0	0	0	0	0	0	0	0	0	0	0	0	0	0	0	0	0	0	0	0	0	0	0	1	0	0	0	0
A0A9N9WPX1	UP001153620	Chironomus riparius	Arthropoda	Metazoa	0	0	0	0	0	0	0	0	0	0	0	0	0	0	0	0	0	0	0	0	0	0	0	0	0	0	0	0	0	0	0	0	0	0	0	0	0	0	0	0	1	0	0	0	0
A0A484B9I6	UP000295192	Drosophila navojoa	Arthropoda	Metazoa	0	0	0	0	0	0	0	0	0	0	0	0	0	0	0	0	0	0	0	0	0	0	0	0	0	0	0	0	0	0	0	0	0	0	0	0	0	0	0	0	1	0	0	0	0
A0A7M7K3E4	UP000594260	Varroa destructor	Arthropoda	Metazoa	0	0	0	0	0	0	0	0	0	0	0	0	0	0	0	0	0	0	0	0	0	0	0	0	0	0	0	0	0	0	0	0	0	0	0	0	0	0	0	0	1	0	0	0	0
A0A8J2K4I9	UP000708208	Allacma fusca	Arthropoda	Metazoa	0	0	0	0	0	0	0	0	0	0	0	0	0	0	0	0	0	0	0	0	0	0	0	0	0	0	0	0	0	0	0	0	0	0	0	0	0	0	0	0	1	0	0	0	0
A0A7R8UWE6	UP000594454	Hermetia illucens	Arthropoda	Metazoa	0	0	0	0	0	0	0	0	0	0	0	0	0	0	0	0	0	0	0	0	0	0	0	0	0	0	0	0	0	0	0	0	0	0	0	0	0	0	0	0	1	0	0	0	0
T1J113	UP000014500	Strigamia maritima	Arthropoda	Metazoa	0	0	0	0	0	0	0	0	0	0	0	0	0	0	0	0	0	0	0	0	0	0	0	0	0	0	0	0	0	0	0	0	0	0	0	0	0	0	0	0	1	0	0	0	0
A0A922HWK6	UP000790347	Dermatophagoides farinae	Arthropoda	Metazoa	0	0	0	0	0	0	0	0	0	0	0	0	0	0	0	0	0	0	0	0	0	0	0	0	0	0	0	0	0	0	0	0	0	0	0	0	0	0	0	0	1	0	0	0	0
A0A182YPP7	UP000076408	Anopheles stephensi	Arthropoda	Metazoa	0	0	0	0	0	0	0	0	0	0	0	0	0	0	0	0	0	0	0	0	0	0	0	0	0	0	0	0	0	0	0	0	0	0	0	0	0	0	0	0	1	0	0	0	0
A0A9P0GLC9	UP001153636	Psylliodes chrysocephala	Arthropoda	Metazoa	0	0	0	0	0	1	0	0	0	0	0	0	0	0	0	0	0	0	0	0	0	0	0	0	0	0	0	0	0	0	0	0	0	0	0	0	0	0	0	0	1	0	0	0	0
A0A6G0U136	UP000475862	Aphis glycines	Arthropoda	Metazoa	0	0	0	0	0	0	0	0	0	0	0	0	0	0	0	0	0	0	0	0	0	0	0	0	0	0	0	0	0	0	0	0	0	0	0	0	0	0	0	0	1	0	0	0	0
A0A9P0JFN3	UP001154329	Aphis gossypii	Arthropoda	Metazoa	0	0	0	0	0	0	0	0	0	0	0	0	0	0	0	0	0	0	0	0	0	0	0	0	0	0	0	0	0	0	0	0	0	0	0	0	0	0	0	0	1	0	0	0	0
A0A139WDH0	UP000007266	Tribolium castaneum	Arthropoda	Metazoa	0	0	0	0	0	0	0	0	0	0	0	0	0	0	0	0	0	0	0	0	0	0	0	0	0	0	0	0	0	0	0	0	0	0	0	0	0	0	0	0	1	0	0	0	0
A0A8K0GJS6	UP000801492	Ignelater luminosus	Arthropoda	Metazoa	0	0	0	0	0	0	0	0	0	0	0	0	0	0	0	0	0	0	0	0	0	0	0	0	0	0	0	0	0	0	0	0	0	0	0	0	0	0	0	0	1	0	0	0	0
A0A5N4A4U0	UP000327044	Photinus pyralis	Arthropoda	Metazoa	0	0	0	0	0	0	0	0	0	0	0	0	0	0	0	0	0	0	0	0	0	0	0	0	0	0	0	0	0	0	0	0	0	0	0	0	0	0	0	0	1	0	0	0	0
A0A8S1DSG0	UP000494165	Cloeon dipterum	Arthropoda	Metazoa	0	0	0	0	0	0	0	0	0	0	0	0	0	0	0	0	0	0	0	0	0	0	0	0	0	0	0	0	0	0	0	0	0	0	0	0	0	0	0	0	1	0	0	0	0
A0A6A4K8H7	UP000466442	Apolygus lucorum	Arthropoda	Metazoa	0	0	0	0	0	0	0	0	0	0	0	0	0	0	0	0	0	0	0	0	0	0	0	0	0	0	0	0	0	0	0	0	0	0	0	0	0	0	0	0	1	0	0	0	0
A0A6L2PVP0	UP000502823	Coptotermes formosanus	Arthropoda	Metazoa	0	0	0	0	0	0	0	0	0	0	0	0	0	0	0	0	0	0	0	0	0	0	0	0	0	0	0	0	0	0	0	0	0	0	0	0	0	0	0	0	1	0	0	0	0
T1KTE4	UP000015104	Tetranychus urticae	Arthropoda	Metazoa	0	0	0	0	0	0	0	0	0	0	0	0	0	0	0	0	0	0	0	0	0	0	0	0	0	0	0	0	0	0	0	0	0	0	0	0	0	0	0	0	1	0	0	0	0
A0A834U7U2	UP000600918	Vespula pensylvanica	Arthropoda	Metazoa	0	0	0	0	0	0	0	0	0	0	0	0	0	0	0	0	0	0	0	0	0	0	0	0	0	0	0	0	0	0	0	0	0	0	0	0	0	0	0	0	1	0	0	0	0
A0A7R9BEL7	UP000678499	Notodromas monacha	Arthropoda	Metazoa	0	0	0	0	0	0	0	0	0	0	0	0	0	0	0	0	0	0	0	0	0	0	0	0	0	0	0	0	0	0	0	0	0	0	0	0	0	0	0	0	1	0	0	0	0
A0A833RZY8	UP000655588	Frieseomelitta varia	Arthropoda	Metazoa	0	0	0	0	0	0	0	0	0	0	0	0	0	0	0	0	0	0	0	0	0	0	0	0	0	0	0	0	0	0	0	0	0	0	0	0	0	0	0	0	1	0	0	0	0
A0AA39KSC0	UP001168990	Microctonus aethiopoides	Arthropoda	Metazoa	0	0	0	0	0	0	0	0	0	0	0	0	0	0	0	0	0	0	0	0	0	0	0	0	0	0	0	0	0	0	0	0	0	0	0	0	0	0	0	0	1	0	0	0	0
A0A7M7N1E7	UP000007110	Strongylocentrotus purpuratus	Echinodermata	Metazoa	0	0	0	0	0	0	0	0	0	0	0	0	0	0	0	0	0	0	0	0	0	0	0	0	0	0	0	0	0	0	0	0	0	0	0	0	0	0	0	0	1	0	0	0	0
A0A813W3P9	UP000663829	Didymodactylos carnosus	Rotifera	Metazoa	0	0	0	0	0	0	0	0	0	0	0	0	0	0	0	0	0	0	0	0	0	0	0	0	0	0	0	0	0	0	0	0	0	0	0	0	0	0	0	0	1	0	0	0	0
A0A814ED14	UP000663829	Didymodactylos carnosus	Rotifera	Metazoa	0	0	0	0	0	0	0	0	0	0	0	0	0	0	0	0	0	0	0	0	0	0	0	0	0	0	0	0	0	0	0	0	0	0	0	0	0	0	0	0	1	0	0	0	0
A0A7M7HCY8	UP000007110	Strongylocentrotus purpuratus	Echinodermata	Metazoa	0	0	0	0	0	0	0	0	0	0	0	0	0	0	0	0	0	0	0	0	0	0	0	0	0	0	0	0	0	0	0	0	0	0	0	0	0	0	0	0	1	0	0	0	0
A7BJS5	UP000005204	Bombyx mori	Arthropoda	Metazoa	0	0	0	0	0	0	0	0	0	0	0	0	0	0	0	0	0	0	0	0	0	0	0	0	0	0	0	0	0	0	0	0	0	0	0	0	0	0	0	0	1	0	0	0	0
A0A821P127	UP000663880	Pieris macdunnoughi	Arthropoda	Metazoa	0	0	0	0	0	0	0	0	0	0	0	0	0	0	0	0	0	0	0	0	0	0	0	0	0	0	0	0	0	0	0	0	0	0	0	0	0	0	0	0	1	0	0	0	0
A0A212F1Y9	UP000007151	Danaus plexippus	Arthropoda	Metazoa	0	0	0	0	0	0	0	0	0	0	0	0	0	0	0	0	0	0	0	0	0	0	0	0	0	0	0	0	0	0	0	0	0	0	0	0	0	0	0	0	1	0	0	0	0
A0A7J6CA85	UP000579812	Onychostoma macrolepis	Chordata	Metazoa	0	0	0	0	0	0	0	0	0	0	0	0	0	0	0	0	0	0	0	0	0	0	0	0	0	0	0	0	0	0	0	0	0	0	0	0	0	0	0	0	1	0	0	0	0
A0A7J5ZZH9	UP000593565	Ameiurus melas	Chordata	Metazoa	0	0	0	0	0	0	0	0	0	0	0	0	0	0	0	0	0	0	0	0	0	0	0	0	0	0	0	0	0	0	0	0	0	0	0	0	0	0	0	0	1	0	0	0	0
V9VID8	UP000301870	Spodoptera litura	Arthropoda	Metazoa	0	0	0	0	0	0	0	0	0	0	0	0	0	0	0	0	0	0	0	0	0	0	0	0	0	0	0	0	0	0	0	0	0	0	0	0	0	0	0	0	1	0	0	0	0
A0A834JV79	UP000617340	Vespula germanica	Arthropoda	Metazoa	0	0	0	0	0	0	0	0	0	0	0	0	0	0	0	0	0	0	0	0	0	0	0	0	0	0	0	0	0	0	0	0	0	0	0	0	0	0	0	0	1	0	0	0	0
A0A834JPV3	UP000614350	Vespula vulgaris	Arthropoda	Metazoa	0	0	0	0	0	0	0	0	0	0	0	0	0	0	0	0	0	0	0	0	0	0	0	0	0	0	0	0	0	0	0	0	0	0	0	0	0	0	0	0	1	0	0	0	0
A0A922HVM9	UP000790347	Dermatophagoides farinae	Arthropoda	Metazoa	0	0	0	0	0	0	0	0	0	0	0	0	0	0	0	0	0	0	0	0	0	0	0	0	0	0	0	0	0	0	0	0	0	0	0	0	0	0	0	0	1	0	0	0	0
A0A8J2KJA9	UP000708208	Allacma fusca	Arthropoda	Metazoa	0	0	0	0	0	0	0	0	0	0	0	0	0	0	0	0	0	0	0	0	0	0	0	0	0	0	0	0	0	0	0	0	0	0	0	0	0	0	0	0	1	0	0	0	0
A0A922L5R9	UP000790347	Dermatophagoides farinae	Arthropoda	Metazoa	0	0	0	0	0	0	0	0	0	0	0	0	0	0	0	0	0	0	0	0	0	0	0	0	0	0	0	0	0	0	0	0	0	0	0	0	0	0	0	0	1	0	0	0	0
A0A922I6F2	UP000790347	Dermatophagoides farinae	Arthropoda	Metazoa	0	0	0	0	0	0	0	0	0	0	0	0	0	0	0	0	0	0	0	0	0	0	0	0	0	0	0	0	0	0	0	0	0	0	0	0	0	0	0	0	1	0	0	0	0
A0A922L0Y9	UP000790347	Dermatophagoides farinae	Arthropoda	Metazoa	0	0	0	0	0	0	0	0	0	0	0	0	0	0	0	0	0	0	0	0	0	0	0	0	0	0	0	0	0	0	0	0	0	0	0	0	0	0	0	0	0	0	0	0	0
T1IBM6	UP000015103	Rhodnius prolixus	Arthropoda	Metazoa	0	0	0	0	0	0	0	0	0	0	0	0	0	0	0	0	0	0	0	0	0	0	0	0	0	0	0	0	0	0	0	0	0	0	0	0	0	0	0	0	1	0	0	0	0
A0A8S3Z558	UP000678393	Candidula unifasciata	Mollusca	Metazoa	0	0	0	0	0	0	0	0	0	0	0	0	0	0	0	0	0	0	0	0	0	0	0	0	0	0	0	0	0	0	0	0	0	0	0	0	0	0	0	0	1	0	0	0	0
A0A553NYG4	UP000318571	Tigriopus californicus	Arthropoda	Metazoa	0	0	0	0	0	0	0	0	0	0	0	0	0	0	0	0	0	0	0	0	0	0	0	0	0	0	0	0	0	0	0	0	0	0	0	0	0	0	0	0	1	0	0	0	0
A0A8J5JEM6	UP000747542	Homarus americanus	Arthropoda	Metazoa	0	0	0	0	0	0	0	0	0	0	0	0	0	0	0	0	0	0	0	0	0	0	0	0	0	0	0	0	0	0	0	0	0	0	0	0	0	0	0	0	1	0	0	0	0
A0A1D5PXD8	UP000000539	Gallus gallus	Chordata	Metazoa	0	0	0	0	0	0	0	0	0	0	0	0	0	0	0	0	0	0	0	0	0	0	0	0	0	0	0	0	0	0	0	0	0	0	0	0	0	0	0	0	1	0	0	0	0
F6PSN5	UP000008143	Xenopus tropicalis	Chordata	Metazoa	0	0	0	0	0	0	0	0	0	0	0	0	0	0	0	0	0	0	0	0	0	0	0	0	0	0	0	0	0	0	0	0	0	0	0	0	0	0	0	0	1	0	0	0	0
A0A6S7ILJ3	UP001152795	Paramuricea clavata	Cnidaria	Metazoa	0	0	0	0	0	0	0	0	0	0	0	0	0	0	0	0	0	0	0	0	0	0	0	0	0	0	0	0	0	0	0	0	0	0	0	0	0	0	0	0	1	0	0	0	0
A0A8K0GBV8	UP000801492	Ignelater luminosus	Arthropoda	Metazoa	0	0	0	0	0	0	0	0	0	0	0	0	0	0	0	0	0	0	0	0	0	0	0	0	0	0	0	0	0	0	0	0	0	0	0	0	0	0	0	0	1	0	0	0	0
A0A9P0DXZ5	UP001153709	Diabrotica balteata	Arthropoda	Metazoa	0	0	0	0	0	0	0	0	0	0	0	0	0	0	0	0	0	0	0	0	0	0	0	0	0	0	0	0	0	0	0	0	0	0	0	0	0	0	0	0	1	0	0	0	0
A0A9P0NQM6	UP001154329	Aphis gossypii	Arthropoda	Metazoa	0	0	0	0	0	0	0	0	0	0	0	0	0	0	0	0	0	0	0	0	0	0	0	0	0	0	0	0	0	0	0	0	0	0	0	0	0	0	0	0	1	0	0	0	0
A0A6G0U0S1	UP000475862	Aphis glycines	Arthropoda	Metazoa	0	0	0	0	0	0	0	0	0	0	0	0	0	0	0	0	0	0	0	0	0	0	0	0	0	0	0	0	0	0	0	0	0	0	0	0	0	0	0	0	1	0	0	0	0
A0A9N9MQF2	UP001152799	Ceutorhynchus assimilis	Arthropoda	Metazoa	0	0	0	0	0	1	0	0	0	0	0	0	0	0	0	0	0	0	0	0	0	0	0	0	0	0	0	0	0	0	0	0	0	0	0	0	0	0	0	0	1	0	0	0	0
A0A9P0BMG3	UP001154114	Chrysodeixis includens	Arthropoda	Metazoa	0	0	0	0	0	0	0	0	0	0	0	0	0	0	0	0	0	0	0	0	0	0	0	0	0	0	0	0	0	0	0	0	0	0	0	0	0	0	0	0	1	0	0	0	0
A0A835L2V6	UP000648187	Spodoptera exigua	Arthropoda	Metazoa	0	0	0	0	0	0	0	0	0	0	0	0	0	0	0	0	0	0	0	0	0	0	0	0	0	0	0	0	0	0	0	0	0	0	0	0	0	0	0	0	1	0	0	0	0
A0A9P0IF94	UP001153321	Spodoptera littoralis	Arthropoda	Metazoa	0	0	0	0	0	0	0	0	0	0	0	0	0	0	0	0	0	0	0	0	0	0	0	0	0	0	0	0	0	0	0	0	0	0	0	0	0	0	0	0	1	0	0	0	0
W5JSF3	UP000000673	Anopheles darlingi	Arthropoda	Metazoa	0	0	0	0	0	0	0	0	0	0	0	0	0	0	0	0	0	0	0	0	0	0	0	0	0	0	0	0	0	0	0	0	0	0	0	0	0	0	0	0	1	0	0	0	0
A0A821R0K0	UP000663880	Pieris macdunnoughi	Arthropoda	Metazoa	0	0	0	0	0	0	0	0	0	0	0	0	0	0	0	0	0	0	0	0	0	0	0	0	0	0	0	0	0	0	0	0	0	0	0	0	0	0	0	0	1	0	0	0	0
A0A813QPM0	UP000663829	Didymodactylos carnosus	Rotifera	Metazoa	0	0	0	0	0	0	0	0	0	0	0	0	0	0	0	0	0	0	0	0	0	0	0	0	0	0	0	0	0	0	0	0	0	0	0	0	0	0	0	0	1	0	0	0	0
A0A212F6G0	UP000007151	Danaus plexippus	Arthropoda	Metazoa	0	0	0	0	0	0	0	0	0	0	0	0	0	0	0	0	0	0	0	0	0	0	0	0	0	0	0	0	0	0	0	0	0	0	0	0	0	0	0	0	0	0	0	0	0
A0A212FGE2	UP000007151	Danaus plexippus	Arthropoda	Metazoa	0	0	0	0	0	0	0	0	0	0	0	0	0	0	0	0	0	0	0	0	0	0	0	0	0	0	0	0	0	0	0	0	0	0	0	0	0	0	0	0	1	0	0	0	0
A0A8J5NB10	UP000747542	Homarus americanus	Arthropoda	Metazoa	0	0	0	0	0	0	0	0	0	0	0	0	0	0	0	0	0	0	0	0	0	0	0	0	0	0	0	0	0	0	0	0	0	0	0	0	0	0	0	0	1	0	0	0	0
A0A8J5NAY3	UP000747542	Homarus americanus	Arthropoda	Metazoa	0	0	0	0	0	0	0	0	0	0	0	0	0	0	0	0	0	0	0	0	0	0	0	0	0	0	0	0	0	0	0	0	0	0	0	0	0	0	0	0	1	0	0	0	0
A0A8J5JC14	UP000747542	Homarus americanus	Arthropoda	Metazoa	0	0	0	0	0	0	0	0	0	0	0	0	0	0	0	0	0	0	0	0	0	0	0	0	0	0	0	0	0	0	0	0	0	0	0	0	0	0	0	0	0	0	0	0	0
A0A8J5MKY0	UP000747542	Homarus americanus	Arthropoda	Metazoa	0	0	0	0	0	0	0	0	0	0	0	0	0	0	0	0	0	0	0	0	0	0	0	0	0	0	0	0	0	0	0	0	0	0	0	0	0	0	0	0	0	0	0	0	0
A0A8J5TLT4	UP000747542	Homarus americanus	Arthropoda	Metazoa	0	0	0	0	0	0	0	0	0	0	0	0	0	0	0	0	0	0	0	0	0	0	0	0	0	0	0	0	0	0	0	0	0	0	0	0	0	0	0	0	0	0	0	0	0
A0A8J5N3Q7	UP000747542	Homarus americanus	Arthropoda	Metazoa	0	0	0	0	0	0	0	0	0	0	0	0	0	0	0	0	0	0	0	0	0	0	0	0	0	0	0	0	0	0	0	0	0	0	0	0	0	0	0	0	0	0	0	0	0
A0A8J5N0G1	UP000747542	Homarus americanus	Arthropoda	Metazoa	0	0	0	0	0	0	0	0	0	0	0	0	0	0	0	0	0	0	0	0	0	0	0	0	0	0	0	0	0	0	0	0	0	0	0	0	0	0	0	0	0	0	0	0	0
A0A8J5NA32	UP000747542	Homarus americanus	Arthropoda	Metazoa	0	0	0	0	0	0	0	0	0	0	0	0	0	0	0	0	0	0	0	0	0	0	0	0	0	0	0	0	0	0	0	0	0	0	0	0	0	0	0	0	0	0	0	0	0
A0A8J5K467	UP000747542	Homarus americanus	Arthropoda	Metazoa	0	0	0	0	0	0	0	0	0	0	0	0	0	0	0	0	0	0	0	0	0	0	0	0	0	0	0	0	0	0	0	0	0	0	0	0	0	0	0	0	0	0	0	0	0
A0A0K0JDP1	UP000006672	Brugia malayi	Nematoda	Metazoa	0	0	0	0	0	0	0	0	0	0	0	0	0	0	0	0	0	0	0	0	0	0	0	0	0	0	0	0	0	0	0	0	0	0	0	0	0	0	0	0	1	0	0	0	0
A0A833VU44	UP000655588	Frieseomelitta varia	Arthropoda	Metazoa	0	0	0	0	0	0	0	0	0	0	0	0	0	0	0	0	0	0	0	0	0	0	0	0	0	0	0	0	0	0	0	0	0	0	0	0	0	0	0	0	1	0	0	0	0
A0A7R8UDM8	UP000594454	Hermetia illucens	Arthropoda	Metazoa	0	0	0	0	0	0	0	0	0	0	0	0	0	0	0	0	0	0	0	0	0	0	0	0	0	0	0	0	0	0	0	0	0	0	0	0	0	0	0	0	1	0	0	0	0
A0A034VH20	UP000504616	Bactrocera dorsalis	Arthropoda	Metazoa	0	0	0	0	0	0	0	0	0	0	0	0	0	0	0	0	0	0	0	0	0	0	0	0	0	0	0	0	0	0	0	0	0	0	0	0	0	0	0	0	1	0	0	0	0
A0A8T3DFD4	UP000829720	Albula goreensis	Chordata	Metazoa	0	0	0	0	0	0	0	0	0	0	0	0	0	0	0	0	0	0	0	0	0	0	0	0	0	0	0	0	0	0	0	0	0	0	0	0	0	0	0	0	1	0	0	0	0
A0A9P0DC16	UP001153636	Psylliodes chrysocephala	Arthropoda	Metazoa	0	0	0	0	0	0	0	0	0	0	0	0	0	0	0	0	0	0	0	0	0	0	0	0	0	0	0	0	0	0	0	0	0	0	0	0	0	0	0	0	1	0	0	0	0
A0A9N9SQR9	UP001153709	Diabrotica balteata	Arthropoda	Metazoa	0	0	0	0	0	0	0	0	0	0	0	0	0	0	0	0	0	0	0	0	0	0	0	0	0	0	0	0	0	0	0	0	0	0	0	0	0	0	0	0	1	0	0	0	0
D2A2S9	UP000007266	Tribolium castaneum	Arthropoda	Metazoa	0	0	0	0	0	0	0	0	0	0	0	0	0	0	0	0	0	0	0	0	0	0	0	0	0	0	0	0	0	0	0	0	0	0	0	0	0	0	0	0	1	0	0	0	0
A0A9N9TL66	UP001153712	Phyllotreta striolata	Arthropoda	Metazoa	0	0	0	0	0	0	0	0	0	0	0	0	0	0	0	0	0	0	0	0	0	0	0	0	0	0	0	0	0	0	0	0	0	0	0	0	0	0	0	0	1	0	0	0	0
B3MX07	UP000007801	Drosophila ananassae	Arthropoda	Metazoa	0	0	0	0	0	0	0	0	0	0	0	0	0	0	0	0	0	0	0	0	0	0	0	0	0	0	0	0	0	0	0	0	0	0	0	0	0	0	0	0	1	0	0	0	0
A0A2I6AXD9	UP000790347	Dermatophagoides farinae	Arthropoda	Metazoa	0	0	0	0	0	0	0	0	0	0	0	0	0	0	0	0	0	0	0	0	0	0	0	0	0	0	0	0	0	0	0	0	0	0	0	0	0	0	0	0	1	0	0	0	0
E9GFR1	UP000000305	Daphnia pulex	Arthropoda	Metazoa	0	0	0	0	0	0	0	0	0	0	0	0	0	0	0	0	0	0	0	0	0	0	0	0	0	0	0	0	0	0	0	0	0	0	0	0	0	0	0	0	1	0	0	0	0
A0A443S0Q8	UP000288716	Leptotrombidium deliense	Arthropoda	Metazoa	0	0	0	0	0	0	0	0	0	0	0	0	0	0	0	0	0	0	0	0	0	0	0	0	0	0	0	0	0	0	0	0	0	0	0	0	0	0	0	0	0	0	0	0	0
A0A9D3T8V7	UP001046870	Megalops atlanticus	Chordata	Metazoa	0	0	0	0	0	0	0	0	0	0	0	0	0	0	0	0	0	0	0	0	0	0	0	0	0	0	0	0	0	0	0	0	0	0	0	0	0	0	0	0	1	0	0	0	0
A0A8J2HP78	UP000786811	Cotesia congregata	Arthropoda	Metazoa	0	0	0	0	0	0	0	0	0	0	0	0	0	0	0	0	0	0	0	0	0	0	0	0	0	0	0	0	0	0	0	0	0	0	0	0	0	0	0	0	1	0	0	0	0
A0A8J2MYW1	UP000786811	Cotesia congregata	Arthropoda	Metazoa	0	0	0	0	0	0	0	0	0	0	0	0	0	0	0	0	0	0	0	0	0	0	0	0	0	0	0	0	0	0	0	0	0	0	0	0	0	0	0	0	1	0	0	0	0
A0A0L7LUZ1	UP000037510	Operophtera brumata	Arthropoda	Metazoa	0	0	0	0	0	0	0	0	0	0	0	0	0	0	0	0	0	0	0	0	0	0	0	0	0	0	0	0	0	0	0	0	0	0	0	0	0	0	0	0	0	0	0	0	0
A0A5E4N5Z2	UP000325440	Cinara cedri	Arthropoda	Metazoa	0	0	0	0	0	0	0	0	0	0	0	0	0	0	0	0	0	0	0	0	0	0	0	0	0	0	0	0	0	0	0	0	0	0	0	0	0	0	0	0	1	0	0	0	0
A0A5E4M2F2	UP000325440	Cinara cedri	Arthropoda	Metazoa	0	0	0	0	0	0	0	0	0	0	0	0	0	0	0	0	0	0	0	0	0	0	0	0	0	0	0	0	0	0	0	0	0	0	0	0	0	0	0	0	1	0	0	0	0
A0A5E4MQ28	UP000325440	Cinara cedri	Arthropoda	Metazoa	0	0	0	0	0	0	0	0	0	0	0	0	0	0	0	0	0	0	0	0	0	0	0	0	0	0	0	0	0	0	0	0	0	0	0	0	0	0	0	0	0	0	0	0	0
A0A5E4NGV9	UP000325440	Cinara cedri	Arthropoda	Metazoa	0	0	0	0	0	0	0	0	0	0	0	0	0	0	0	0	0	0	0	0	0	0	0	0	0	0	0	0	0	0	0	0	0	0	0	0	0	0	0	0	1	0	0	0	0
A0A5E4N4C0	UP000325440	Cinara cedri	Arthropoda	Metazoa	0	0	0	0	0	0	0	0	0	0	0	0	0	0	0	0	0	0	0	0	0	0	0	0	0	0	0	0	0	0	0	0	0	0	0	0	0	0	0	0	1	0	0	0	0
A0A5E4NB18	UP000325440	Cinara cedri	Arthropoda	Metazoa	0	0	0	0	0	0	0	0	0	0	0	0	0	0	0	0	0	0	0	0	0	0	0	0	0	0	0	0	0	0	0	0	0	0	0	0	0	0	0	0	1	0	0	0	0
Q21770	UP000001940	Caenorhabditis elegans	Nematoda	Metazoa	0	0	0	0	0	0	0	0	0	0	0	0	0	0	0	0	0	0	0	0	0	0	0	0	0	0	0	0	0	0	0	0	0	0	0	0	0	0	0	0	1	0	0	0	0
O62275	UP000001940	Caenorhabditis elegans	Nematoda	Metazoa	0	0	0	0	0	0	0	0	0	0	0	0	0	0	0	0	0	0	0	0	0	0	0	0	0	0	0	0	0	0	0	0	0	0	0	0	0	0	0	0	1	0	0	0	0
A0A667IHK5	UP000472241	Lynx canadensis	Chordata	Metazoa	0	0	0	0	0	0	0	0	0	0	0	0	0	0	0	0	0	0	0	0	0	0	0	0	0	0	0	0	0	0	0	0	0	0	0	0	0	0	0	0	1	0	0	0	0
A0A8C3LK54	UP000694543	Chrysolophus pictus	Chordata	Metazoa	0	0	0	0	0	0	0	0	0	0	0	0	0	0	0	0	0	0	0	0	0	0	0	0	0	0	0	0	0	0	0	0	0	0	0	0	0	0	0	0	1	0	0	0	0
A0A6I8N9X4	UP000002279	Ornithorhynchus anatinus	Chordata	Metazoa	0	0	0	0	0	0	0	0	0	0	0	0	0	0	0	0	0	0	0	0	0	0	0	0	0	0	0	0	0	0	0	0	0	0	0	0	0	0	0	0	1	0	0	0	0
H2ZVK6	UP000008672	Latimeria chalumnae	Chordata	Metazoa	0	0	0	0	0	0	0	0	0	0	0	0	0	0	0	0	0	0	0	0	0	0	0	0	0	0	0	0	0	0	0	0	0	0	0	0	0	0	0	0	1	0	0	0	0
A0A8C6TGY4	UP000694523	Neogobius melanostomus	Chordata	Metazoa	0	0	0	0	0	0	0	0	0	0	0	0	0	0	0	0	0	0	0	0	0	0	0	0	0	0	0	0	0	0	0	0	0	0	0	0	0	0	0	0	1	0	0	0	0
A0A8C4B8W6	UP000694580	Denticeps clupeoides	Chordata	Metazoa	0	0	0	0	0	0	0	0	0	0	0	0	0	0	0	0	0	0	0	0	0	0	0	0	0	0	0	0	0	0	0	0	0	0	0	0	0	0	0	0	1	0	0	0	0
A0A9J8CS75	UP001108240	Cyprinus carpio	Chordata	Metazoa	0	0	0	0	0	0	0	0	0	0	0	0	0	0	0	0	0	0	0	0	0	0	0	0	0	0	0	0	0	0	0	0	0	0	0	0	0	0	0	0	1	0	0	0	0
A0A8C6PM55	UP000694548	Nothobranchius furzeri	Chordata	Metazoa	0	0	0	0	0	0	0	0	0	0	0	0	0	0	0	0	0	0	0	0	0	0	0	0	0	0	0	0	0	0	0	0	0	0	0	0	0	0	0	0	1	0	0	0	0
H2LIH8	UP000001038	Oryzias latipes	Chordata	Metazoa	0	0	0	0	0	0	0	0	0	0	0	0	0	0	0	0	0	0	0	0	0	0	0	0	0	0	0	0	0	0	0	0	0	0	0	0	0	0	0	0	1	0	0	0	0
A0A8C5W967	UP000694569	Leptobrachium leishanense	Chordata	Metazoa	0	0	0	0	0	0	0	0	0	0	0	0	0	0	0	0	0	0	0	0	0	0	0	0	0	0	0	0	0	0	0	0	0	0	0	0	0	0	0	0	1	0	0	0	0
G1P2P6	UP000001074	Myotis lucifugus	Chordata	Metazoa	0	0	0	0	0	0	0	0	0	0	0	0	0	0	0	0	0	0	0	0	0	0	0	0	0	0	0	0	0	0	0	0	0	0	0	0	0	0	0	0	1	0	0	0	0
A0A9L0JQ65	UP000694387	Equus asinus	Chordata	Metazoa	0	0	0	0	0	0	0	0	0	0	0	0	0	0	0	0	0	0	0	0	0	0	0	0	0	0	0	0	0	0	0	0	0	0	0	0	0	0	0	0	1	0	0	0	0
A0A673K050	UP000472270	Sinocyclocheilus rhinocerous	Chordata	Metazoa	0	0	0	0	0	0	0	0	0	0	0	0	0	0	0	0	0	0	0	0	0	0	0	0	0	0	0	0	0	0	0	0	0	0	0	0	0	0	0	0	0	0	0	0	0
A0A5F9CCF5	UP000001811	Oryctolagus cuniculus	Chordata	Metazoa	0	0	0	0	0	0	0	0	0	0	0	0	0	0	0	0	0	0	0	0	0	0	0	0	0	0	0	0	0	0	0	0	0	0	0	0	0	0	0	0	1	0	0	0	0
A0A5N3XCE0	UP000326062	Muntiacus reevesi	Chordata	Metazoa	0	0	0	0	0	0	0	0	0	0	0	0	0	0	0	0	0	0	0	0	0	0	0	0	0	0	0	0	0	0	0	0	0	0	0	0	0	0	0	0	1	0	0	0	0
A0A7K7F616	UP000557271	Chionis minor	Chordata	Metazoa	0	0	0	0	0	0	0	0	0	0	0	0	0	0	0	0	0	0	0	0	0	0	0	0	0	0	0	0	0	0	0	0	0	0	0	0	0	0	0	0	1	0	0	0	0
A0A851Z253	UP000648918	Halcyon senegalensis	Chordata	Metazoa	0	0	0	0	0	0	0	0	0	0	0	0	0	0	0	0	0	0	0	0	0	0	0	0	0	0	0	0	0	0	0	0	0	0	0	0	0	0	0	0	1	0	0	0	0
A0A7K6RIM8	UP000570016	Rhynochetos jubatus	Chordata	Metazoa	0	0	0	0	0	0	0	0	0	0	0	0	0	0	0	0	0	0	0	0	0	0	0	0	0	0	0	0	0	0	0	0	0	0	0	0	0	0	0	0	1	0	0	0	0
A0A7L3T6C0	UP000540089	Rissa tridactyla	Chordata	Metazoa	0	0	0	0	0	0	0	0	0	0	0	0	0	0	0	0	0	0	0	0	0	0	0	0	0	0	0	0	0	0	0	0	0	0	0	0	0	0	0	0	1	0	0	0	0
A0A7L3R5R5	UP000578766	Cepphus grylle	Chordata	Metazoa	0	0	0	0	0	0	0	0	0	0	0	0	0	0	0	0	0	0	0	0	0	0	0	0	0	0	0	0	0	0	0	0	0	0	0	0	0	0	0	0	1	0	0	0	0
A0A7K5GKU7	UP000541181	Chunga burmeisteri	Chordata	Metazoa	0	0	0	0	0	0	0	0	0	0	0	0	0	0	0	0	0	0	0	0	0	0	0	0	0	0	0	0	0	0	0	0	0	0	0	0	0	0	0	0	1	0	0	0	0
A0A851NZH6	UP000613066	Penelope pileata	Chordata	Metazoa	0	0	0	0	0	0	0	0	0	0	0	0	0	0	0	0	0	0	0	0	0	0	0	0	0	0	0	0	0	0	0	0	0	0	0	0	0	0	0	0	1	0	0	0	0
A0A7K4Z3B1	UP000551127	Bucorvus abyssinicus	Chordata	Metazoa	0	0	0	0	0	0	0	0	0	0	0	0	0	0	0	0	0	0	0	0	0	0	0	0	0	0	0	0	0	0	0	0	0	0	0	0	0	0	0	0	1	0	0	0	0
A0A7L0GVD2	UP000555649	Herpetotheres cachinnans	Chordata	Metazoa	0	0	0	0	0	0	0	0	0	0	0	0	0	0	0	0	0	0	0	0	0	0	0	0	0	0	0	0	0	0	0	0	0	0	0	0	0	0	0	0	1	0	0	0	0
A0A7L0S1B2	UP000591073	Glaucidium brasilianum	Chordata	Metazoa	0	0	0	0	0	0	0	0	0	0	0	0	0	0	0	0	0	0	0	0	0	0	0	0	0	0	0	0	0	0	0	0	0	0	0	0	0	0	0	0	1	0	0	0	0
A0A8J4NE18	UP000782854	Eudyptula minor	Chordata	Metazoa	0	0	0	0	0	0	0	0	0	0	0	0	0	0	0	0	0	0	0	0	0	0	0	0	0	0	0	0	0	0	0	0	0	0	0	0	0	0	0	0	1	0	0	0	0
A0A7K7KW00	UP000525565	Asarcornis scutulata	Chordata	Metazoa	0	0	0	0	0	0	0	0	0	0	0	0	0	0	0	0	0	0	0	0	0	0	0	0	0	0	0	0	0	0	0	0	0	0	0	0	0	0	0	0	1	0	0	0	0
A0A9Q1B5E5	UP001142489	Phrynocephalus forsythii	Chordata	Metazoa	0	0	0	0	0	0	0	0	0	0	0	0	0	0	0	0	0	0	0	0	0	0	0	0	0	0	0	0	0	0	0	0	0	0	0	0	0	0	0	0	1	0	0	0	0
G5C8Y7	UP000006813	Heterocephalus glaber	Chordata	Metazoa	0	0	0	0	0	0	0	0	0	0	0	0	0	0	0	0	0	0	0	0	0	0	0	0	0	0	0	0	0	0	0	0	0	0	0	0	0	0	0	0	1	0	0	0	0
A0A9W7THB2	UP001059041	Triplophysa rosa	Chordata	Metazoa	0	0	0	0	0	0	0	0	0	0	0	0	0	0	0	0	0	0	0	0	0	0	0	0	0	0	0	0	0	0	0	0	0	0	0	0	0	0	0	0	1	0	0	0	0
L8HQI8	UP000011080	Bos mutus	Chordata	Metazoa	0	0	0	0	0	0	0	0	0	0	0	0	0	0	0	0	0	0	0	0	0	0	0	0	0	0	0	0	0	0	0	0	0	0	0	0	0	0	0	0	1	0	0	0	0
A0A672UXS0	UP000472266	Strigops habroptila	Chordata	Metazoa	0	0	0	0	0	0	0	0	0	0	0	0	0	0	0	0	0	0	0	0	0	0	0	0	0	0	0	0	0	0	0	0	0	0	0	0	0	0	0	0	0	0	0	0	0
G1PE96	UP000001074	Myotis lucifugus	Chordata	Metazoa	0	0	0	0	0	0	0	0	0	0	0	0	0	0	0	0	0	0	0	0	0	0	0	0	0	0	0	0	0	0	0	0	0	0	0	0	0	0	0	0	1	0	0	0	0
H2MJH2	UP000001038	Oryzias latipes	Chordata	Metazoa	0	0	0	0	0	0	0	0	0	0	0	0	0	0	0	0	0	0	0	0	0	0	0	0	0	0	0	0	0	0	0	0	0	0	0	0	0	0	0	0	1	0	0	0	0
A0A8C3WC99	UP000694540	Catagonus wagneri	Chordata	Metazoa	0	0	0	0	0	0	0	0	0	0	0	0	0	0	0	0	0	0	0	0	0	0	0	0	0	0	0	0	0	0	0	0	0	0	0	0	0	0	0	0	1	0	0	0	0
A0A5F5XJA9	UP000011712	Felis catus	Chordata	Metazoa	0	0	0	0	0	0	0	0	0	0	0	0	0	0	0	0	0	0	0	0	0	0	0	0	0	0	0	0	0	0	0	0	0	0	0	0	0	0	0	0	1	0	0	0	0
K7FJ40	UP000007267	Pelodiscus sinensis	Chordata	Metazoa	0	0	0	0	0	0	0	0	0	0	0	0	0	0	0	0	0	0	0	0	0	0	0	0	0	0	0	0	0	0	0	0	0	0	0	0	0	0	0	0	1	0	0	0	0
A0A8C3C1H6	UP000694556	Cairina moschata	Chordata	Metazoa	0	0	0	0	0	0	0	0	0	0	0	0	0	0	0	0	0	0	0	0	0	0	0	0	0	0	0	0	0	0	0	0	0	0	0	0	0	0	0	0	1	0	0	0	0
G3ND16	UP000007635	Gasterosteus aculeatus	Chordata	Metazoa	0	0	0	0	0	0	0	0	0	0	0	0	0	0	0	0	0	0	0	0	0	0	0	0	0	0	0	0	0	0	0	0	0	0	0	0	0	0	0	0	1	0	0	0	0
A0A668RGU4	UP000472276	Oreochromis aureus	Chordata	Metazoa	0	0	0	0	0	0	0	0	0	0	0	0	0	0	0	0	0	0	0	0	0	0	0	0	0	0	0	0	0	0	0	0	0	0	0	0	0	0	0	0	1	0	0	0	0
A0A4W4GHY8	UP000314983	Electrophorus electricus	Chordata	Metazoa	0	0	0	0	0	0	0	0	0	0	0	0	0	0	0	0	0	0	0	0	0	0	0	0	0	0	0	0	0	0	0	0	0	0	0	0	0	0	0	0	1	0	0	0	0
A0A286XBV0	UP000005447	Cavia porcellus	Chordata	Metazoa	0	0	0	0	0	0	0	0	0	0	0	0	0	0	0	0	0	0	0	0	0	0	0	0	0	0	0	0	0	0	0	0	0	0	0	0	0	0	0	0	1	0	0	0	0
A0A8C4PN56	UP000694387	Equus asinus	Chordata	Metazoa	0	0	0	0	0	0	0	0	0	0	0	0	0	0	0	0	0	0	0	0	0	0	0	0	0	0	0	0	0	0	0	0	0	0	0	0	0	0	0	0	1	0	0	0	0
A0A8C1B980	UP001108240	Cyprinus carpio	Chordata	Metazoa	0	0	0	0	0	0	0	0	0	0	0	0	0	0	0	0	0	0	0	0	0	0	0	0	0	0	0	0	0	0	0	0	0	0	0	0	0	0	0	0	1	0	0	0	0
G3PFT8	UP000007635	Gasterosteus aculeatus	Chordata	Metazoa	0	0	0	0	0	0	0	0	0	0	0	0	0	0	0	0	0	0	0	0	0	0	0	0	0	0	0	0	0	0	0	0	0	0	0	0	0	0	0	0	1	0	0	0	0
A0A8C1JP43	UP000694427	Cyprinus carpio	Chordata	Metazoa	0	0	0	0	0	0	0	0	0	0	0	0	0	0	0	0	0	0	0	0	0	0	0	0	0	0	0	0	0	0	0	0	0	0	0	0	0	0	0	0	1	0	0	0	0
A0A669DGG3	UP000005207	Oreochromis niloticus	Chordata	Metazoa	0	0	0	0	0	0	0	0	0	0	0	0	0	0	0	0	0	0	0	0	0	0	0	0	0	0	0	0	0	0	0	0	0	0	0	0	0	0	0	0	1	0	0	0	0
A0A3Q3WLF8	UP000261620	Mola mola	Chordata	Metazoa	0	0	0	0	0	0	0	0	0	0	0	0	0	0	0	0	0	0	0	0	0	0	0	0	0	0	0	0	0	0	0	0	0	0	0	0	0	0	0	0	1	0	0	0	0
W5K4D5	UP000018467	Astyanax mexicanus	Chordata	Metazoa	0	0	0	0	0	0	0	0	0	0	0	0	0	0	0	0	0	0	0	0	0	0	0	0	0	0	0	0	0	0	0	0	0	0	0	0	0	0	0	0	1	0	0	0	0
A0A4W5MD72	UP000314982	Hucho hucho	Chordata	Metazoa	0	0	0	0	0	0	0	0	0	0	0	0	0	0	0	0	0	0	0	0	0	0	0	0	0	0	0	0	0	0	0	0	0	0	0	0	0	0	0	0	1	0	0	0	0
A0A673I949	UP000472270	Sinocyclocheilus rhinocerous	Chordata	Metazoa	0	0	0	0	0	0	0	0	0	0	0	0	0	0	0	0	0	0	0	0	0	0	0	0	0	0	0	0	0	0	0	0	0	0	0	0	0	0	0	0	1	0	0	0	0
A0A3Q1IUK9	UP000265040	Anabas testudineus	Chordata	Metazoa	0	0	0	0	0	0	0	0	0	0	0	0	0	0	0	0	0	0	0	0	0	0	0	0	0	0	0	0	0	0	0	0	0	0	0	0	0	0	0	0	1	0	0	0	0
A0A087XM98	UP000028760	Poecilia formosa	Chordata	Metazoa	0	0	0	0	0	0	0	0	0	0	0	0	0	0	0	0	0	0	0	0	0	0	0	0	0	0	0	0	0	0	0	0	0	0	0	0	0	0	0	0	1	0	0	0	0
A0A8C1I6T2	UP000694427	Cyprinus carpio	Chordata	Metazoa	0	0	0	0	0	0	0	0	0	0	0	0	0	0	0	0	0	0	0	0	0	0	0	0	0	0	0	0	0	0	0	0	0	0	0	0	0	0	0	0	1	0	0	0	0
A0A8C1B992	UP001108240	Cyprinus carpio	Chordata	Metazoa	0	0	0	0	0	0	0	0	0	0	0	0	0	0	0	0	0	0	0	0	0	0	0	0	0	0	0	0	0	0	0	0	0	0	0	0	0	0	0	0	1	0	0	0	0
A0A674MPT7	UP000005226	Takifugu rubripes	Chordata	Metazoa	0	0	0	0	0	0	0	0	0	0	0	0	0	0	0	0	0	0	0	0	0	0	0	0	0	0	0	0	0	0	0	0	0	0	0	0	0	0	0	0	1	0	0	0	0
A0A7N8Y4U7	UP000261640	Mastacembelus armatus	Chordata	Metazoa	0	0	0	0	0	0	0	0	0	0	0	0	0	0	0	0	0	0	0	0	0	0	0	0	0	0	0	0	0	0	0	0	0	0	0	0	0	0	0	0	1	0	0	0	0
A0A4W6EHM2	UP000314980	Lates calcarifer	Chordata	Metazoa	0	0	0	0	0	0	0	0	0	0	0	0	0	0	0	0	0	0	0	0	0	0	0	0	0	0	0	0	0	0	0	0	0	0	0	0	0	0	0	0	1	0	0	0	0
A0A4W5PQG7	UP000314982	Hucho hucho	Chordata	Metazoa	0	0	0	0	0	0	0	0	0	0	0	0	0	0	0	0	0	0	0	0	0	0	0	0	0	0	0	0	0	0	0	0	0	0	0	0	0	0	0	0	1	0	0	0	0
A0A8C7ZEH5	UP000694383	Oryzias sinensis	Chordata	Metazoa	0	0	0	0	0	0	0	0	0	0	0	0	0	0	0	0	0	0	0	0	0	0	0	0	0	0	0	0	0	0	0	0	0	0	0	0	0	0	0	0	1	0	0	0	0
H2LZ32	UP000001038	Oryzias latipes	Chordata	Metazoa	0	0	0	0	0	0	0	0	0	0	0	0	0	0	0	0	0	0	0	0	0	0	0	0	0	0	0	0	0	0	0	0	0	0	0	0	0	0	0	0	1	0	0	0	0
A0A8C1BT05	UP001108240	Cyprinus carpio	Chordata	Metazoa	0	0	0	0	0	0	0	0	0	0	0	0	0	0	0	0	0	0	0	0	0	0	0	0	0	0	0	0	0	0	0	0	0	0	0	0	0	0	0	0	1	0	0	0	0
A0A671Z268	UP000472265	Sparus aurata	Chordata	Metazoa	0	0	0	0	0	0	0	0	0	0	0	0	0	0	0	0	0	0	0	0	0	0	0	0	0	0	0	0	0	0	0	0	0	0	0	0	0	0	0	0	1	0	0	0	0
A0A8C9X162	UP000694568	Sander lucioperca	Chordata	Metazoa	0	0	0	0	0	0	0	0	0	0	0	0	0	0	0	0	0	0	0	0	0	0	0	0	0	0	0	0	0	0	0	0	0	0	0	0	0	0	0	0	1	0	0	0	0
A0A8C3G8L7	UP000694565	Cyclopterus lumpus	Chordata	Metazoa	0	0	0	0	0	0	0	0	0	0	0	0	0	0	0	0	0	0	0	0	0	0	0	0	0	0	0	0	0	0	0	0	0	0	0	0	0	0	0	0	1	0	0	0	0
H3CAB7	UP000007303	Tetraodon nigroviridis	Chordata	Metazoa	0	0	0	0	0	0	0	0	0	0	0	0	0	0	0	0	0	0	0	0	0	0	0	0	0	0	0	0	0	0	0	0	0	0	0	0	0	0	0	0	1	0	0	0	0
A0A4W4ETN5	UP000314983	Electrophorus electricus	Chordata	Metazoa	0	0	0	0	0	0	0	0	0	0	0	0	0	0	0	0	0	0	0	0	0	0	0	0	0	0	0	0	0	0	0	0	0	0	0	0	0	0	0	0	1	0	0	0	0
A0A3P8VJ04	UP000265120	Cynoglossus semilaevis	Chordata	Metazoa	0	0	0	0	0	0	0	0	0	0	0	0	0	0	0	0	0	0	0	0	0	0	0	0	0	0	0	0	0	0	0	0	0	0	0	0	0	0	0	0	1	0	0	0	0
W5KQH5	UP000018467	Astyanax mexicanus	Chordata	Metazoa	0	0	0	0	0	0	0	0	0	0	0	0	0	0	0	0	0	0	0	0	0	0	0	0	0	0	0	0	0	0	0	0	0	0	0	0	0	0	0	0	1	0	0	0	0
A0A2I0LRR9	UP000053872	Columba livia	Chordata	Metazoa	0	0	0	0	0	0	0	0	0	0	0	0	0	0	0	0	0	0	0	0	0	0	0	0	0	0	0	0	0	0	0	0	0	0	0	0	0	0	0	0	1	0	0	0	0
A0A8C6HCC3	UP000694415	Mus spicilegus	Chordata	Metazoa	0	0	0	0	0	0	0	0	0	0	0	0	0	0	0	0	0	0	0	0	0	0	0	0	0	0	0	0	0	0	0	0	0	0	0	0	0	0	0	0	1	0	0	0	0
A0A8C6MGB4	UP000694548	Nothobranchius furzeri	Chordata	Metazoa	0	0	0	0	0	0	0	0	0	0	0	0	0	0	0	0	0	0	0	0	0	0	0	0	0	0	0	0	0	0	0	0	0	0	0	0	0	0	0	0	2	0	0	0	0
A0A3Q1JB68	UP000265040	Anabas testudineus	Chordata	Metazoa	0	0	0	0	0	0	0	0	0	0	0	0	0	0	0	0	0	0	0	0	0	0	0	0	0	0	0	0	0	0	0	0	0	0	0	0	0	0	0	0	2	0	0	0	0
A0A8C9YJ14	UP000694568	Sander lucioperca	Chordata	Metazoa	0	0	0	0	0	0	0	0	0	0	0	0	0	0	0	0	0	0	0	0	0	0	0	0	0	0	0	0	0	0	0	0	0	0	0	0	0	0	0	0	2	0	0	0	0
A0A8C5UC71	UP000694560	Malurus cyaneus	Chordata	Metazoa	0	0	0	0	0	0	0	0	0	0	0	0	0	0	0	0	0	0	0	0	0	0	0	0	0	0	0	0	0	0	0	0	0	0	0	0	0	0	0	0	2	0	0	0	0
A0A8C7FSV0	UP000694557	Oncorhynchus kisutch	Chordata	Metazoa	0	0	0	0	0	0	0	0	0	0	0	0	0	0	0	0	0	0	0	0	0	0	0	0	0	0	0	0	0	0	0	0	0	0	0	0	0	0	0	0	1	0	0	0	0
A0A7N8XXQ5	UP000261640	Mastacembelus armatus	Chordata	Metazoa	0	0	0	0	0	0	0	0	0	0	0	0	0	0	0	0	0	0	0	0	0	0	0	0	0	0	0	0	0	0	0	0	0	0	0	0	0	0	0	0	2	0	0	0	0
W5K3J1	UP000018467	Astyanax mexicanus	Chordata	Metazoa	0	0	0	0	0	0	0	0	0	0	0	0	0	0	0	0	0	0	0	0	0	0	0	0	0	0	0	0	0	0	0	0	0	0	0	0	0	0	0	0	1	0	0	0	0
A0A8B9MKA4	UP000694541	Accipiter nisus	Chordata	Metazoa	0	0	0	0	0	0	0	0	0	0	0	0	0	0	0	0	0	0	0	0	0	0	0	0	0	0	0	0	0	0	0	0	0	0	0	0	0	0	0	0	1	0	0	0	0
A0A8B9PRB3	UP000694424	Apteryx owenii	Chordata	Metazoa	0	0	0	0	0	0	0	0	0	0	0	0	0	0	0	0	0	0	0	0	0	0	0	0	0	0	0	0	0	0	0	0	0	0	0	0	0	0	0	0	1	0	0	0	0
R4GB99	UP000001646	Anolis carolinensis	Chordata	Metazoa	0	0	0	0	0	0	0	0	0	0	0	0	0	0	0	0	0	0	0	0	0	0	0	0	0	0	0	0	0	0	0	0	0	0	0	0	0	0	0	0	1	0	0	0	0
A0A8D0EK96	UP000694551	Strix occidentalis	Chordata	Metazoa	0	0	0	0	0	0	0	0	0	0	0	0	0	0	0	0	0	0	0	0	0	0	0	0	0	0	0	0	0	0	0	0	0	0	0	0	0	0	0	0	1	0	0	0	0
A0A8C0BIZ5	UP000694555	Buteo japonicus	Chordata	Metazoa	0	0	0	0	0	0	0	0	0	0	0	0	0	0	0	0	0	0	0	0	0	0	0	0	0	0	0	0	0	0	0	0	0	0	0	0	0	0	0	0	1	0	0	0	0
G3T6C8	UP000007646	Loxodonta africana	Chordata	Metazoa	0	0	0	0	0	0	0	0	0	0	0	0	0	0	0	0	0	0	0	0	0	0	0	0	0	0	0	0	0	0	0	0	0	0	0	0	0	0	0	0	1	0	0	0	0
A0A803VSS1	UP000016665	Ficedula albicollis	Chordata	Metazoa	0	0	0	0	0	0	0	0	0	0	0	0	0	0	0	0	0	0	0	0	0	0	0	0	0	0	0	0	0	0	0	0	0	0	0	0	0	0	0	0	1	0	0	0	0
A0A8C8R9N5	UP000694393	Pelusios castaneus	Chordata	Metazoa	0	0	0	0	0	0	0	0	0	0	0	0	0	0	0	0	0	0	0	0	0	0	0	0	0	0	0	0	0	0	0	0	0	0	0	0	0	0	0	0	1	0	0	0	0
A0A2K5LQ67	UP000233060	Cercocebus atys	Chordata	Metazoa	0	0	0	0	0	0	0	0	0	0	0	0	0	0	0	0	0	0	0	0	0	0	0	0	0	0	0	0	0	0	0	0	0	0	0	0	0	0	0	0	1	0	0	0	0
F6QQB3	UP000002281	Equus caballus	Chordata	Metazoa	0	0	0	0	0	0	0	0	0	0	0	0	0	0	0	0	0	0	0	0	0	0	0	0	0	0	0	0	0	0	0	0	0	0	0	0	0	0	0	0	1	0	0	0	0
A0A8D0MTW9	UP000008227	Sus scrofa	Chordata	Metazoa	0	0	0	0	0	0	0	0	0	0	0	0	0	0	0	0	0	0	0	0	0	0	0	0	0	0	0	0	0	0	0	0	0	0	0	0	0	0	0	0	1	0	0	0	0
A0A8C4XPJ7	UP000694562	Falco tinnunculus	Chordata	Metazoa	0	0	0	0	0	0	0	0	0	0	0	0	0	0	0	0	0	0	0	0	0	0	0	0	0	0	0	0	0	0	0	0	0	0	0	0	0	0	0	0	1	0	0	0	0
F6ZVC9	UP000002279	Ornithorhynchus anatinus	Chordata	Metazoa	0	0	0	0	0	0	0	0	0	0	0	0	0	0	0	0	0	0	0	0	0	0	0	0	0	0	0	0	0	0	0	0	0	0	0	0	0	0	0	0	1	0	0	0	0
H0YTT1	UP000007754	Taeniopygia guttata	Chordata	Metazoa	0	0	0	0	0	0	0	0	0	0	0	0	0	0	0	0	0	0	0	0	0	0	0	0	0	0	0	0	0	0	0	0	0	0	0	0	0	0	0	0	1	0	0	0	0
A0A8C3QV90	UP000694396	Cyanoderma ruficeps	Chordata	Metazoa	0	0	0	0	0	0	0	0	0	0	0	0	0	0	0	0	0	0	0	0	0	0	0	0	0	0	0	0	0	0	0	0	0	0	0	0	0	0	0	0	1	0	0	0	0
A0A669PLN3	UP000472261	Phasianus colchicus	Chordata	Metazoa	0	0	0	0	0	0	0	0	0	0	0	0	0	0	0	0	0	0	0	0	0	0	0	0	0	0	0	0	0	0	0	0	0	0	0	0	0	0	0	0	1	0	0	0	0
A0A8B9IGK3	UP000694521	Anser cygnoides	Chordata	Metazoa	0	0	0	0	0	0	0	0	0	0	0	0	0	0	0	0	0	0	0	0	0	0	0	0	0	0	0	0	0	0	0	0	0	0	0	0	0	0	0	0	1	0	0	0	0
A0A8C3BYL9	UP000694556	Cairina moschata	Chordata	Metazoa	0	0	0	0	0	0	0	0	0	0	0	0	0	0	0	0	0	0	0	0	0	0	0	0	0	0	0	0	0	0	0	0	0	0	0	0	0	0	0	0	1	0	0	0	0
A0A663EF94	UP000472275	Aquila chrysaetos	Chordata	Metazoa	0	0	0	0	0	0	0	0	0	0	0	0	0	0	0	0	0	0	0	0	0	0	0	0	0	0	0	0	0	0	0	0	0	0	0	0	0	0	0	0	1	0	0	0	0
U3ISJ4	UP000016666	Anas platyrhynchos	Chordata	Metazoa	0	0	0	0	0	0	0	0	0	0	0	0	0	0	0	0	0	0	0	0	0	0	0	0	0	0	0	0	0	0	0	0	0	0	0	0	0	0	0	0	1	0	0	0	0
A0A8C9CGC0	UP000694554	Phocoena sinus	Chordata	Metazoa	0	0	0	0	0	0	0	0	0	0	0	0	0	0	0	0	0	0	0	0	0	0	0	0	0	0	0	0	0	0	0	0	0	0	0	0	0	0	0	0	1	0	0	0	0
A0A2K6RP27	UP000233200	Rhinopithecus roxellana	Chordata	Metazoa	0	0	0	0	0	0	0	0	0	0	0	0	0	0	0	0	0	0	0	0	0	0	0	0	0	0	0	0	0	0	0	0	0	0	0	0	0	0	0	0	1	0	0	0	0
A0A2I3S3B8	UP000002277	Pan troglodytes	Chordata	Metazoa	0	0	0	0	0	0	0	0	0	0	0	0	0	0	0	0	0	0	0	0	0	0	0	0	0	0	0	0	0	0	0	0	0	0	0	0	0	0	0	0	1	0	0	0	0
G1L139	UP000008912	Ailuropoda melanoleuca	Chordata	Metazoa	0	0	0	0	0	0	0	0	0	0	0	0	0	0	0	0	0	0	0	0	0	0	0	0	0	0	0	0	0	0	0	0	0	0	0	0	0	0	0	0	1	0	0	0	0
G3QLB6	UP000001519	Gorilla gorilla	Chordata	Metazoa	0	0	0	0	0	0	0	0	0	0	0	0	0	0	0	0	0	0	0	0	0	0	0	0	0	0	0	0	0	0	0	0	0	0	0	0	0	0	0	0	1	0	0	0	0
A0A7J8K4J7	UP000593571	Rousettus aegyptiacus	Chordata	Metazoa	0	0	0	0	0	0	0	0	0	0	0	0	0	0	0	0	0	0	0	0	0	0	0	0	0	0	0	0	0	0	0	0	0	0	0	0	0	0	0	0	1	0	0	0	0
A0A2K6SKJ8	UP000233220	Saimiri boliviensis	Chordata	Metazoa	0	0	0	0	0	0	0	0	0	0	0	0	0	0	0	0	0	0	0	0	0	0	0	0	0	0	0	0	0	0	0	0	0	0	0	0	0	0	0	0	1	0	0	0	0
A0A0D9S7T3	UP000029965	Chlorocebus sabaeus	Chordata	Metazoa	0	0	0	0	0	0	0	0	0	0	0	0	0	0	0	0	0	0	0	0	0	0	0	0	0	0	0	0	0	0	0	0	0	0	0	0	0	0	0	0	1	0	0	0	0
A0A8C8YCL2	UP000694399	Panthera leo	Chordata	Metazoa	0	0	0	0	0	0	0	0	0	0	0	0	0	0	0	0	0	0	0	0	0	0	0	0	0	0	0	0	0	0	0	0	0	0	0	0	0	0	0	0	1	0	0	0	0
A0A2K5PE65	UP000233040	Cebus imitator	Chordata	Metazoa	0	0	0	0	0	0	0	0	0	0	0	0	0	0	0	0	0	0	0	0	0	0	0	0	0	0	0	0	0	0	0	0	0	0	0	0	0	0	0	0	1	0	0	0	0
A0A8D2K4A3	UP000694411	Theropithecus gelada	Chordata	Metazoa	0	0	0	0	0	0	0	0	0	0	0	0	0	0	0	0	0	0	0	0	0	0	0	0	0	0	0	0	0	0	0	0	0	0	0	0	0	0	0	0	1	0	0	0	0
A0A8C2VM30	UP000694398	Chinchilla lanigera	Chordata	Metazoa	0	0	0	0	0	0	0	0	0	0	0	0	0	0	0	0	0	0	0	0	0	0	0	0	0	0	0	0	0	0	0	0	0	0	0	0	0	0	0	0	1	0	0	0	0
A0A286XQ36	UP000005447	Cavia porcellus	Chordata	Metazoa	0	0	0	0	0	0	0	0	0	0	0	0	0	0	0	0	0	0	0	0	0	0	0	0	0	0	0	0	0	0	0	0	0	0	0	0	0	0	0	0	1	0	0	0	0
A0A2K6L125	UP000233180	Rhinopithecus bieti	Chordata	Metazoa	0	0	0	0	0	0	0	0	0	0	0	0	0	0	0	0	0	0	0	0	0	0	0	0	0	0	0	0	0	0	0	0	0	0	0	0	0	0	0	0	1	0	0	0	0
A0A8C3WB89	UP000694540	Catagonus wagneri	Chordata	Metazoa	0	0	0	0	0	0	0	0	0	0	0	0	0	0	0	0	0	0	0	0	0	0	0	0	0	0	0	0	0	0	0	0	0	0	0	0	0	0	0	0	1	0	0	0	0
A0A8C9HB66	UP000694416	Piliocolobus tephrosceles	Chordata	Metazoa	0	0	0	0	0	0	0	0	0	0	0	0	0	0	0	0	0	0	0	0	0	0	0	0	0	0	0	0	0	0	0	0	0	0	0	0	0	0	0	0	1	0	0	0	0
A0A2K5JUG4	UP000233080	Colobus angolensis	Chordata	Metazoa	0	0	0	0	0	0	0	0	0	0	0	0	0	0	0	0	0	0	0	0	0	0	0	0	0	0	0	0	0	0	0	0	0	0	0	0	0	0	0	0	1	0	0	0	0
A0A8C7AXM6	UP000694425	Neogale vison	Chordata	Metazoa	0	0	0	0	0	0	0	0	0	0	0	0	0	0	0	0	0	0	0	0	0	0	0	0	0	0	0	0	0	0	0	0	0	0	0	0	0	0	0	0	1	0	0	0	0
H9FSW2	UP000006718	Macaca mulatta	Chordata	Metazoa	0	0	0	0	0	0	0	0	0	0	0	0	0	0	0	0	0	0	0	0	0	0	0	0	0	0	0	0	0	0	0	0	0	0	0	0	0	0	0	0	1	0	0	0	0
A0A2K5ZLA8	UP000233140	Mandrillus leucophaeus	Chordata	Metazoa	0	0	0	0	0	0	0	0	0	0	0	0	0	0	0	0	0	0	0	0	0	0	0	0	0	0	0	0	0	0	0	0	0	0	0	0	0	0	0	0	1	0	0	0	0
M3VVB8	UP000011712	Felis catus	Chordata	Metazoa	0	0	0	0	0	0	0	0	0	0	0	0	0	0	0	0	0	0	0	0	0	0	0	0	0	0	0	0	0	0	0	0	0	0	0	0	0	0	0	0	1	0	0	0	0
A0A667H6K7	UP000472241	Lynx canadensis	Chordata	Metazoa	0	0	0	0	0	0	0	0	0	0	0	0	0	0	0	0	0	0	0	0	0	0	0	0	0	0	0	0	0	0	0	0	0	0	0	0	0	0	0	0	1	0	0	0	0
A0A8D2GPA3	UP000694417	Urocitellus parryii	Chordata	Metazoa	0	0	0	0	0	0	0	0	0	0	0	0	0	0	0	0	0	0	0	0	0	0	0	0	0	0	0	0	0	0	0	0	0	0	0	0	0	0	0	0	1	0	0	0	0
A0A671DN17	UP000472240	Rhinolophus ferrumequinum	Chordata	Metazoa	0	0	0	0	0	0	0	0	0	0	0	0	0	0	0	0	0	0	0	0	0	0	0	0	0	0	0	0	0	0	0	0	0	0	0	0	0	0	0	0	1	0	0	0	0
G1TRN0	UP000001811	Oryctolagus cuniculus	Chordata	Metazoa	0	0	0	0	0	0	0	0	0	0	0	0	0	0	0	0	0	0	0	0	0	0	0	0	0	0	0	0	0	0	0	0	0	0	0	0	0	0	0	0	1	0	0	0	0
A0A8D2AHP8	UP000694564	Sciurus vulgaris	Chordata	Metazoa	0	0	0	0	0	0	0	0	0	0	0	0	0	0	0	0	0	0	0	0	0	0	0	0	0	0	0	0	0	0	0	0	0	0	0	0	0	0	0	0	1	0	0	0	0
A0A673TDA5	UP000472268	Suricata suricatta	Chordata	Metazoa	0	0	0	0	0	0	0	0	0	0	0	0	0	0	0	0	0	0	0	0	0	0	0	0	0	0	0	0	0	0	0	0	0	0	0	0	0	0	0	0	1	0	0	0	0
A0A8C9PZL4	UP000694422	Spermophilus dauricus	Chordata	Metazoa	0	0	0	0	0	0	0	0	0	0	0	0	0	0	0	0	0	0	0	0	0	0	0	0	0	0	0	0	0	0	0	0	0	0	0	0	0	0	0	0	1	0	0	0	0
A0A2K5W6Z7	UP000233100	Macaca fascicularis	Chordata	Metazoa	0	0	0	0	0	0	0	0	0	0	0	0	0	0	0	0	0	0	0	0	0	0	0	0	0	0	0	0	0	0	0	0	0	0	0	0	0	0	0	0	1	0	0	0	0
A0A2K6G1U2	UP000233160	Propithecus coquereli	Chordata	Metazoa	0	0	0	0	0	0	0	0	0	0	0	0	0	0	0	0	0	0	0	0	0	0	0	0	0	0	0	0	0	0	0	0	0	0	0	0	0	0	0	0	1	0	0	0	0
A0A4X2JX23	UP000314987	Vombatus ursinus	Chordata	Metazoa	0	0	0	0	0	0	0	0	0	0	0	0	0	0	0	0	0	0	0	0	0	0	0	0	0	0	0	0	0	0	0	0	0	0	0	0	0	0	0	0	1	0	0	0	0
A0A8C5V6D6	UP000694394	Microcebus murinus	Chordata	Metazoa	0	0	0	0	0	0	0	0	0	0	0	0	0	0	0	0	0	0	0	0	0	0	0	0	0	0	0	0	0	0	0	0	0	0	0	0	0	0	0	0	1	0	0	0	0
A0A2K5F5S7	UP000233020	Aotus nancymaae	Chordata	Metazoa	0	0	0	0	0	0	0	0	0	0	0	0	0	0	0	0	0	0	0	0	0	0	0	0	0	0	0	0	0	0	0	0	0	0	0	0	0	0	0	0	1	0	0	0	0
H0X2C6	UP000005225	Otolemur garnettii	Chordata	Metazoa	0	0	0	0	0	0	0	0	0	0	0	0	0	0	0	0	0	0	0	0	0	0	0	0	0	0	0	0	0	0	0	0	0	0	0	0	0	0	0	0	1	0	0	0	0
A0A7J7ZSL8	UP000527355	Myotis myotis	Chordata	Metazoa	0	0	0	0	0	0	0	0	0	0	0	0	0	0	0	0	0	0	0	0	0	0	0	0	0	0	0	0	0	0	0	0	0	0	0	0	0	0	0	0	1	0	0	0	0
A0A7J8F6K2	UP000550707	Molossus molossus	Chordata	Metazoa	0	0	0	0	0	0	0	0	0	0	0	0	0	0	0	0	0	0	0	0	0	0	0	0	0	0	0	0	0	0	0	0	0	0	0	0	0	0	0	0	1	0	0	0	0
A0A7J8A567	UP000558488	Pipistrellus kuhlii	Chordata	Metazoa	0	0	0	0	0	0	0	0	0	0	0	0	0	0	0	0	0	0	0	0	0	0	0	0	0	0	0	0	0	0	0	0	0	0	0	0	0	0	0	0	1	0	0	0	0
A0A8C8Z3M8	UP000694414	Prolemur simus	Chordata	Metazoa	0	0	0	0	0	0	0	0	0	0	0	0	0	0	0	0	0	0	0	0	0	0	0	0	0	0	0	0	0	0	0	0	0	0	0	0	0	0	0	0	1	0	0	0	0
A0A8C0H8R5	UP000694404	Chelonoidis abingdonii	Chordata	Metazoa	0	0	0	0	0	0	0	0	0	0	0	0	0	0	0	0	0	0	0	0	0	0	0	0	0	0	0	0	0	0	0	0	0	0	0	0	0	0	0	0	1	0	0	0	0
A0A8C3TEF4	UP000694403	Chelydra serpentina	Chordata	Metazoa	0	0	0	0	0	0	0	0	0	0	0	0	0	0	0	0	0	0	0	0	0	0	0	0	0	0	0	0	0	0	0	0	0	0	0	0	0	0	0	0	1	0	0	0	0
A0A670IXJ7	UP000472272	Podarcis muralis	Chordata	Metazoa	0	0	0	0	0	0	0	0	0	0	0	0	0	0	0	0	0	0	0	0	0	0	0	0	0	0	0	0	0	0	0	0	0	0	0	0	0	0	0	0	1	0	0	0	0
A0A8D2J860	UP000694545	Varanus komodoensis	Chordata	Metazoa	0	0	0	0	0	0	0	0	0	0	0	0	0	0	0	0	0	0	0	0	0	0	0	0	0	0	0	0	0	0	0	0	0	0	0	0	0	0	0	0	1	0	0	0	0
A0A8D2P0P9	UP000694401	Zosterops lateralis	Chordata	Metazoa	0	0	0	0	0	0	0	0	0	0	0	0	0	0	0	0	0	0	0	0	0	0	0	0	0	0	0	0	0	0	0	0	0	0	0	0	0	0	0	0	1	0	0	0	0
A0A8C1JE19	UP000694427	Cyprinus carpio	Chordata	Metazoa	0	0	0	0	0	0	0	0	0	0	0	0	0	0	0	0	0	0	0	0	0	0	0	0	0	0	0	0	0	0	0	0	0	0	0	0	0	0	0	0	1	0	0	0	0
A0A8C3J9S0	UP000694419	Calidris pygmaea	Chordata	Metazoa	0	0	0	0	0	0	0	0	0	0	0	0	0	0	0	0	0	0	0	0	0	0	0	0	0	0	0	0	0	0	0	0	0	0	0	0	0	0	0	0	1	0	0	0	0
A0A2I3NC50	UP000028761	Papio anubis	Chordata	Metazoa	0	0	0	0	0	0	0	0	0	0	0	0	0	0	0	0	0	0	0	0	0	0	0	0	0	0	0	0	0	0	0	0	0	0	0	0	0	0	0	0	1	0	0	0	0
A0A8C6UME1	UP000694523	Neogobius melanostomus	Chordata	Metazoa	0	0	0	0	0	0	0	0	0	0	0	0	0	0	0	0	0	0	0	0	0	0	0	0	0	0	0	0	0	0	0	0	0	0	0	0	0	0	0	0	1	0	0	0	0
A0A668VLT3	UP000472276	Oreochromis aureus	Chordata	Metazoa	0	0	0	0	0	0	0	0	0	0	0	0	0	0	0	0	0	0	0	0	0	0	0	0	0	0	0	0	0	0	0	0	0	0	0	0	0	0	0	0	1	0	0	0	0
A0A674IQU6	UP000472274	Terrapene triunguis	Chordata	Metazoa	0	0	0	0	0	0	0	0	0	0	0	0	0	0	0	0	0	0	0	0	0	0	0	0	0	0	0	0	0	0	0	0	0	0	0	0	0	0	0	0	1	0	0	0	0
A0A8C6DIF7	UP000694544	Moschus moschiferus	Chordata	Metazoa	0	0	0	0	0	0	0	0	0	0	0	0	0	0	0	0	0	0	0	0	0	0	0	0	0	0	0	0	0	0	0	0	0	0	0	0	0	0	0	0	1	0	0	0	0
A0A8C7X673	UP000694383	Oryzias sinensis	Chordata	Metazoa	0	0	0	0	0	0	0	0	0	0	0	0	0	0	0	0	0	0	0	0	0	0	0	0	0	0	0	0	0	0	0	0	0	0	0	0	0	0	0	0	1	0	0	0	0
I3KHI5	UP000005207	Oreochromis niloticus	Chordata	Metazoa	0	0	0	0	0	0	0	0	0	0	0	0	0	0	0	0	0	0	0	0	0	0	0	0	0	0	0	0	0	0	0	0	0	0	0	0	0	0	0	0	1	0	0	0	0
H3D3H8	UP000007303	Tetraodon nigroviridis	Chordata	Metazoa	0	0	0	0	0	0	0	0	0	0	0	0	0	0	0	0	0	0	0	0	0	0	0	0	0	0	0	0	0	0	0	0	0	0	0	0	0	0	0	0	1	0	0	0	0
A0A4W6BYF8	UP000314980	Lates calcarifer	Chordata	Metazoa	0	0	0	0	0	0	0	0	0	0	0	0	0	0	0	0	0	0	0	0	0	0	0	0	0	0	0	0	0	0	0	0	0	0	0	0	0	0	0	0	1	0	0	0	0
A0A8C2Z8Q3	UP000694565	Cyclopterus lumpus	Chordata	Metazoa	0	0	0	0	0	0	0	0	0	0	0	0	0	0	0	0	0	0	0	0	0	0	0	0	0	0	0	0	0	0	0	0	0	0	0	0	0	0	0	0	1	0	0	0	0
A0A674N6G0	UP000005226	Takifugu rubripes	Chordata	Metazoa	0	0	0	0	0	0	0	0	0	0	0	0	0	0	0	0	0	0	0	0	0	0	0	0	0	0	0	0	0	0	0	0	0	0	0	0	0	0	0	0	1	0	0	0	0
A0AAA9T6L5	UP000009136	Bos taurus	Chordata	Metazoa	0	0	0	0	0	0	0	0	0	0	0	0	0	0	0	0	0	0	0	0	0	0	0	0	0	0	0	0	0	0	0	0	0	0	0	0	0	0	0	0	1	0	0	0	0
A0A3B3INQ4	UP000001038	Oryzias latipes	Chordata	Metazoa	0	0	0	0	0	0	0	0	0	0	0	0	0	0	0	0	0	0	0	0	0	0	0	0	0	0	0	0	0	0	0	0	0	0	0	0	0	0	0	0	1	0	0	0	0
A0AA88Q3V2	UP001187343	Cirrhinus molitorella	Chordata	Metazoa	0	0	0	0	0	0	0	0	0	0	0	0	0	0	0	0	0	0	0	0	0	0	0	0	0	0	0	0	0	0	0	0	0	0	0	0	0	0	0	0	1	0	0	0	0
A0A8C0A9R4	UP000694520	Bos grunniens	Chordata	Metazoa	0	0	0	0	0	0	0	0	0	0	0	0	0	0	0	0	0	0	0	0	0	0	0	0	0	0	0	0	0	0	0	0	0	0	0	0	0	0	0	0	1	0	0	0	0
A0A4W5LFC2	UP000314982	Hucho hucho	Chordata	Metazoa	0	0	0	0	0	0	0	0	0	0	0	0	0	0	0	0	0	0	0	0	0	0	0	0	0	0	0	0	0	0	0	0	0	0	0	0	0	0	0	0	1	0	0	0	0
A0A8C8CFQ2	UP000694402	Oncorhynchus tshawytscha	Chordata	Metazoa	0	0	0	0	0	0	0	0	0	0	0	0	0	0	0	0	0	0	0	0	0	0	0	0	0	0	0	0	0	0	0	0	0	0	0	0	0	0	0	0	1	0	0	0	0
A0A8I3QBC2	UP000805418	Canis lupus	Chordata	Metazoa	0	0	0	0	0	0	0	0	0	0	0	0	0	0	0	0	0	0	0	0	0	0	0	0	0	0	0	0	0	0	0	0	0	0	0	0	0	0	0	0	1	0	0	0	0
A0A8I5ZP12	UP000002494	Rattus norvegicus	Chordata	Metazoa	0	0	0	0	0	0	0	0	0	0	0	0	0	0	0	0	0	0	0	0	0	0	0	0	0	0	0	0	0	0	0	0	0	0	0	0	0	0	0	0	1	0	0	0	0
G3PFT0	UP000007635	Gasterosteus aculeatus	Chordata	Metazoa	0	0	0	0	0	0	0	0	0	0	0	0	0	0	0	0	0	0	0	0	0	0	0	0	0	0	0	0	0	0	0	0	0	0	0	0	0	0	0	0	1	0	0	0	0
G3WYU1	UP000007648	Sarcophilus harrisii	Chordata	Metazoa	0	0	0	0	0	0	0	0	0	0	0	0	0	0	0	0	0	0	0	0	0	0	0	0	0	0	0	0	0	0	0	0	0	0	0	0	0	0	0	0	1	0	0	0	0
A0A8C5LTL9	UP000694569	Leptobrachium leishanense	Chordata	Metazoa	0	0	0	0	0	0	0	0	0	0	0	0	0	0	0	0	0	0	0	0	0	0	0	0	0	0	0	0	0	0	0	0	0	0	0	0	0	0	0	0	1	0	0	0	0
A0A8C5FHV7	UP000694546	Gadus morhua	Chordata	Metazoa	0	0	0	0	0	0	0	0	0	0	0	0	0	0	0	0	0	0	0	0	0	0	0	0	0	0	0	0	0	0	0	0	0	0	0	0	0	0	0	0	1	0	0	0	0
A0A4W3HCA1	UP000314986	Callorhinchus milii	Chordata	Metazoa	0	0	0	0	0	0	0	0	0	0	0	0	0	0	0	0	0	0	0	0	0	0	0	0	0	0	0	0	0	0	0	0	0	0	0	0	0	0	0	0	1	0	0	0	0
A0A8C1HJG8	UP001108240	Cyprinus carpio	Chordata	Metazoa	0	0	0	0	0	0	0	0	0	0	0	0	0	0	0	0	0	0	0	0	0	0	0	0	0	0	0	0	0	0	0	0	0	0	0	0	0	0	0	0	1	0	0	0	0
A0A8D0G351	UP000694392	Sphenodon punctatus	Chordata	Metazoa	0	0	0	0	0	0	0	0	0	0	0	0	0	0	0	0	0	0	0	0	0	0	0	0	0	0	0	0	0	0	0	0	0	0	0	0	0	0	0	0	1	0	0	0	0
A0A8C9KNG3	UP000675900	Panthera tigris	Chordata	Metazoa	0	0	0	0	0	0	0	0	0	0	0	0	0	0	0	0	0	0	0	0	0	0	0	0	0	0	0	0	0	0	0	0	0	0	0	0	0	0	0	0	1	0	0	0	0
A0A8C4M1S6	UP000694387	Equus asinus	Chordata	Metazoa	0	0	0	0	0	0	0	0	0	0	0	0	0	0	0	0	0	0	0	0	0	0	0	0	0	0	0	0	0	0	0	0	0	0	0	0	0	0	0	0	1	0	0	0	0
A0A8D0AZT8	UP000694421	Salvator merianae	Chordata	Metazoa	0	0	0	0	0	0	0	0	0	0	0	0	0	0	0	0	0	0	0	0	0	0	0	0	0	0	0	0	0	0	0	0	0	0	0	0	0	0	0	0	1	0	0	0	0
A0A8C1FQ89	UP001108240	Cyprinus carpio	Chordata	Metazoa	0	0	0	0	0	0	0	0	0	0	0	0	0	0	0	0	0	0	0	0	0	0	0	0	0	0	0	0	0	0	0	0	0	0	0	0	0	0	0	0	1	0	0	0	0
A0A8C3LQG9	UP000694543	Chrysolophus pictus	Chordata	Metazoa	0	0	0	0	0	0	0	0	0	0	0	0	0	0	0	0	0	0	0	0	0	0	0	0	0	0	0	0	0	0	0	0	0	0	0	0	0	0	0	0	1	0	0	0	0
F7GIF3	UP000008225	Callithrix jacchus	Chordata	Metazoa	0	0	0	0	0	0	0	0	0	0	0	0	0	0	0	0	0	0	0	0	0	0	0	0	0	0	0	0	0	0	0	0	0	0	0	0	0	0	0	0	1	0	0	0	0
K7GHN5	UP000007267	Pelodiscus sinensis	Chordata	Metazoa	0	0	0	0	0	0	0	0	0	0	0	0	0	0	0	0	0	0	0	0	0	0	0	0	0	0	0	0	0	0	0	0	0	0	0	0	0	0	0	0	1	0	0	0	0
A0A672SRA9	UP000472262	Sinocyclocheilus grahami	Chordata	Metazoa	0	0	0	0	0	0	0	0	0	0	0	0	0	0	0	0	0	0	0	0	0	0	0	0	0	0	0	0	0	0	0	0	0	0	0	0	0	0	0	0	1	0	0	0	0
A0A2K6BCG3	UP000233120	Macaca nemestrina	Chordata	Metazoa	0	0	0	0	0	0	0	0	0	0	0	0	0	0	0	0	0	0	0	0	0	0	0	0	0	0	0	0	0	0	0	0	0	0	0	0	0	0	0	0	1	0	0	0	0
H3BBR6	UP000008672	Latimeria chalumnae	Chordata	Metazoa	0	0	0	0	0	0	0	0	0	0	0	0	0	0	0	0	0	0	0	0	0	0	0	0	0	0	0	0	0	0	0	0	0	0	0	0	0	0	0	0	1	0	0	0	0
A0A8C1PWG2	UP000694427	Cyprinus carpio	Chordata	Metazoa	0	0	0	0	0	0	0	0	0	0	0	0	0	0	0	0	0	0	0	0	0	0	0	0	0	0	0	0	0	0	0	0	0	0	0	0	0	0	0	0	1	0	0	0	0
A0A4W4GKX2	UP000314983	Electrophorus electricus	Chordata	Metazoa	0	0	0	0	0	0	0	0	0	0	0	0	0	0	0	0	0	0	0	0	0	0	0	0	0	0	0	0	0	0	0	0	0	0	0	0	0	0	0	0	1	0	0	0	0
A0A663MW10	UP000472269	Athene cunicularia	Chordata	Metazoa	0	0	0	0	0	0	0	0	0	0	0	0	0	0	0	0	0	0	0	0	0	0	0	0	0	0	0	0	0	0	0	0	0	0	0	0	0	0	0	0	1	0	0	0	0
A0A670XSB1	UP000472273	Pseudonaja textilis	Chordata	Metazoa	0	0	0	0	0	0	0	0	0	0	0	0	0	0	0	0	0	0	0	0	0	0	0	0	0	0	0	0	0	0	0	0	0	0	0	0	0	0	0	0	0	0	0	0	0
A0A8C6VHU8	UP000694559	Naja naja	Chordata	Metazoa	0	0	0	0	0	0	0	0	0	0	0	0	0	0	0	0	0	0	0	0	0	0	0	0	0	0	0	0	0	0	0	0	0	0	0	0	0	0	0	0	1	0	0	0	0
A0A5J5N136	UP000326062	Muntiacus reevesi	Chordata	Metazoa	0	0	0	0	0	0	0	0	0	0	0	0	0	0	0	0	0	0	0	0	0	0	0	0	0	0	0	0	0	0	0	0	0	0	0	0	0	0	0	0	1	0	0	0	0
A0A8C6SS47	UP000694523	Neogobius melanostomus	Chordata	Metazoa	0	0	0	0	0	0	0	0	0	0	0	0	0	0	0	0	0	0	0	0	0	0	0	0	0	0	0	0	0	0	0	0	0	0	0	0	0	0	0	0	1	0	0	0	0
A0A668U6F2	UP000472276	Oreochromis aureus	Chordata	Metazoa	0	0	0	0	0	0	0	0	0	0	0	0	0	0	0	0	0	0	0	0	0	0	0	0	0	0	0	0	0	0	0	0	0	0	0	0	0	0	0	0	1	0	0	0	0
A0A3Q1I4J9	UP000257200	Acanthochromis polyacanthus	Chordata	Metazoa	0	0	0	0	0	0	0	0	0	0	0	0	0	0	0	0	0	0	0	0	0	0	0	0	0	0	0	0	0	0	0	0	0	0	0	0	0	0	0	0	1	0	0	0	0
A0A8C8EQS3	UP000694402	Oncorhynchus tshawytscha	Chordata	Metazoa	0	0	0	0	0	0	0	0	0	0	0	0	0	0	0	0	0	0	0	0	0	0	0	0	0	0	0	0	0	0	0	0	0	0	0	0	0	0	0	0	1	0	0	0	0
A0A8C3QY61	UP000694396	Cyanoderma ruficeps	Chordata	Metazoa	0	0	0	0	0	0	0	0	0	0	0	0	0	0	0	0	0	0	0	0	0	0	0	0	0	0	0	0	0	0	0	0	0	0	0	0	0	0	0	0	1	0	0	0	0
A0A2K6TJZ6	UP000233220	Saimiri boliviensis	Chordata	Metazoa	0	0	0	0	0	0	0	0	0	0	0	0	0	0	0	0	0	0	0	0	0	0	0	0	0	0	0	0	0	0	0	0	0	0	0	0	0	0	0	0	1	0	0	0	0
A0A4W6F929	UP000314980	Lates calcarifer	Chordata	Metazoa	0	0	0	0	0	0	0	0	0	0	0	0	0	0	0	0	0	0	0	0	0	0	0	0	0	0	0	0	0	0	0	0	0	0	0	0	0	0	0	0	1	0	0	0	0
A0A8C1AV39	UP001108240	Cyprinus carpio	Chordata	Metazoa	0	0	0	0	0	0	0	0	0	0	0	0	0	0	0	0	0	0	0	0	0	0	0	0	0	0	0	0	0	0	0	0	0	0	0	0	0	0	0	0	1	0	0	0	0
A0A3Q1CVN5	UP000257160	Amphiprion ocellaris	Chordata	Metazoa	0	0	0	0	0	0	0	0	0	0	0	0	0	0	0	0	0	0	0	0	0	0	0	0	0	0	0	0	0	0	0	0	0	0	0	0	0	0	0	0	0	0	0	0	0
A0A3Q2D7W7	UP000265020	Cyprinodon variegatus	Chordata	Metazoa	0	0	0	0	0	0	0	0	0	0	0	0	0	0	0	0	0	0	0	0	0	0	0	0	0	0	0	0	0	0	0	0	0	0	0	0	0	0	0	0	0	0	0	0	0
A0A3P8VTN1	UP000265120	Cynoglossus semilaevis	Chordata	Metazoa	0	0	0	0	0	0	0	0	0	0	0	0	0	0	0	0	0	0	0	0	0	0	0	0	0	0	0	0	0	0	0	0	0	0	0	0	0	0	0	0	1	0	0	0	0
A0A5J5N013	UP000326062	Muntiacus reevesi	Chordata	Metazoa	0	0	0	0	0	0	0	0	0	0	0	0	0	0	0	0	0	0	0	0	0	0	0	0	0	0	0	0	0	0	0	0	0	0	0	0	0	0	0	0	1	0	0	0	0
Q32KD4	UP000000803	Drosophila melanogaster	Arthropoda	Metazoa	0	0	0	0	0	0	0	0	0	0	0	0	0	0	0	0	0	0	0	0	0	0	0	0	0	0	0	0	0	0	0	0	0	0	0	0	0	0	0	0	1	0	0	0	0
A0A0P5DP86	UP000076858	Daphnia magna	Arthropoda	Metazoa	0	0	0	0	0	0	0	0	0	0	0	0	0	0	0	0	0	0	0	0	0	0	0	0	0	0	0	0	0	0	0	0	0	0	0	0	0	0	0	0	0	0	0	0	0
A0A922CMB7	UP000791440	Manduca sexta	Arthropoda	Metazoa	0	0	0	0	0	0	0	0	0	0	0	0	0	0	0	0	0	0	0	0	0	0	0	0	0	0	0	0	0	0	0	0	0	0	0	0	0	0	0	0	1	0	0	0	0
A0A482W3G1	UP000292052	Asbolus verrucosus	Arthropoda	Metazoa	0	0	0	0	0	0	0	0	0	0	0	0	0	0	0	0	0	0	0	0	0	0	0	0	0	0	0	0	0	0	0	0	0	0	0	0	0	0	0	0	0	0	0	0	0
L8IPT2	UP000011080	Bos mutus	Chordata	Metazoa	0	0	0	0	0	0	0	0	0	0	0	0	0	0	0	0	0	0	0	0	0	0	0	0	0	0	0	0	0	0	0	0	0	0	0	0	0	0	0	0	1	0	0	0	0
A0A0A0A1M3	UP000053858	Charadrius vociferus	Chordata	Metazoa	0	0	0	0	0	0	0	0	0	0	0	0	0	0	0	0	0	0	0	0	0	0	0	0	0	0	0	0	0	0	0	0	0	0	0	0	0	0	0	0	1	0	0	0	0
A0A091GJE3	UP000053760	Cuculus canorus	Chordata	Metazoa	0	0	0	0	0	0	0	0	0	0	0	0	0	0	0	0	0	0	0	0	0	0	0	0	0	0	0	0	0	0	0	0	0	0	0	0	0	0	0	0	1	0	0	0	0
A0A093NZ78	UP000054081	Pygoscelis adeliae	Chordata	Metazoa	0	0	0	0	0	0	0	0	0	0	0	0	0	0	0	0	0	0	0	0	0	0	0	0	0	0	0	0	0	0	0	0	0	0	0	0	0	0	0	0	1	0	0	0	0
A0A091VJJ4	UP000053283	Nipponia nippon	Chordata	Metazoa	0	0	0	0	0	0	0	0	0	0	0	0	0	0	0	0	0	0	0	0	0	0	0	0	0	0	0	0	0	0	0	0	0	0	0	0	0	0	0	0	1	0	0	0	0
A0A087RCP1	UP000053286	Aptenodytes forsteri	Chordata	Metazoa	0	0	0	0	0	0	0	0	0	0	0	0	0	0	0	0	0	0	0	0	0	0	0	0	0	0	0	0	0	0	0	0	0	0	0	0	0	0	0	0	1	0	0	0	0
A0A6S7I8S6	UP001152795	Paramuricea clavata	Cnidaria	Metazoa	0	0	0	0	0	0	0	0	0	0	0	0	0	0	0	0	0	0	0	0	0	0	0	0	0	0	0	0	0	0	0	0	0	0	0	0	0	0	0	0	1	0	0	0	0
A0A6S7HZC7	UP001152795	Paramuricea clavata	Cnidaria	Metazoa	0	0	0	0	0	0	0	0	0	0	0	0	0	0	0	0	0	0	0	0	0	0	0	0	0	0	0	0	0	0	0	0	0	0	0	0	0	0	0	0	1	0	0	0	0
A0A7D9E4S6	UP001152795	Paramuricea clavata	Cnidaria	Metazoa	0	0	0	0	0	0	0	0	0	0	0	0	0	0	0	0	0	0	0	0	0	0	0	0	0	0	0	0	0	0	0	0	0	0	0	0	0	0	0	0	0	0	0	0	0
A0A6S7IZ23	UP001152795	Paramuricea clavata	Cnidaria	Metazoa	0	0	0	0	0	0	0	0	0	0	0	0	0	0	0	0	0	0	0	0	0	0	0	0	0	0	0	0	0	0	0	0	0	0	0	0	0	0	0	0	1	0	0	0	0
A0A7D9IPU3	UP001152795	Paramuricea clavata	Cnidaria	Metazoa	0	0	0	0	0	0	0	0	0	0	0	0	0	0	0	0	0	0	0	0	0	0	0	0	0	0	0	0	0	0	0	0	0	0	0	0	0	0	0	0	1	0	0	0	0
A0A3M7SRJ5	UP000276133	Brachionus plicatilis	Rotifera	Metazoa	0	0	0	0	0	0	0	0	0	0	0	0	0	0	0	0	0	0	0	0	0	0	0	0	0	0	0	0	0	0	0	0	0	0	0	0	0	0	0	0	1	0	0	0	0
A0A7D9HG59	UP001152795	Paramuricea clavata	Cnidaria	Metazoa	0	0	0	0	0	0	0	0	0	0	0	0	0	0	0	0	0	0	0	0	0	0	0	0	0	0	0	0	0	0	0	0	0	0	0	0	0	0	0	0	1	0	0	0	0
A0A6S7KGL9	UP001152795	Paramuricea clavata	Cnidaria	Metazoa	0	0	0	0	0	0	0	0	0	0	0	0	0	0	0	0	0	0	0	0	0	0	0	0	0	0	0	0	0	0	0	0	0	0	0	0	0	0	0	0	1	0	0	0	0
A0A6S7HW13	UP001152795	Paramuricea clavata	Cnidaria	Metazoa	0	0	0	0	0	0	0	0	0	0	0	0	0	0	0	0	0	0	0	0	0	0	0	0	0	0	0	0	0	0	0	0	0	0	0	0	0	0	0	0	0	0	0	0	0
D6W6C8	UP000007266	Tribolium castaneum	Arthropoda	Metazoa	0	0	0	0	0	0	0	0	0	0	0	0	0	0	0	0	0	0	0	0	0	0	0	0	0	0	0	0	0	0	0	0	0	0	0	0	0	0	0	0	1	0	0	0	0
D6WJK1	UP000007266	Tribolium castaneum	Arthropoda	Metazoa	0	0	0	0	0	0	0	0	0	0	0	0	0	0	0	0	0	0	0	0	0	0	0	0	0	0	0	0	0	0	0	0	0	0	0	0	0	0	0	0	1	0	0	0	0
A0A0B5FZ79	UP000192223	Agrilus planipennis	Arthropoda	Metazoa	0	0	0	0	0	0	0	0	0	0	0	0	0	0	0	0	0	0	0	0	0	0	0	0	0	0	0	0	0	0	0	0	0	0	0	0	0	0	0	0	1	0	0	0	0
A0A8J2HLK8	UP000786811	Cotesia congregata	Arthropoda	Metazoa	0	0	0	0	0	0	0	0	0	0	0	0	0	0	0	0	0	0	0	0	0	0	0	0	0	0	0	0	0	0	0	0	0	0	0	0	0	0	0	0	1	0	0	0	0
A0A226NG28	UP000198323	Callipepla squamata	Chordata	Metazoa	0	0	0	0	0	0	0	0	0	0	0	0	0	0	0	0	0	0	0	0	0	0	0	0	0	0	0	0	0	0	0	0	0	0	0	0	0	0	0	0	1	0	0	0	0
A0A6A5EU00	UP000465112	Perca fluviatilis	Chordata	Metazoa	0	0	0	0	0	0	0	0	0	0	0	0	0	0	0	0	0	0	0	0	0	0	0	0	0	0	0	0	0	0	0	0	0	0	0	0	0	0	0	0	1	0	0	0	0
A0A553R2G9	UP000316079	Danionella translucida	Chordata	Metazoa	0	0	0	0	0	0	0	0	0	0	0	0	0	0	0	0	0	0	0	0	0	0	0	0	0	0	0	0	0	0	0	0	0	0	0	0	0	0	0	0	1	0	0	0	0
A0A553R2H0	UP000316079	Danionella translucida	Chordata	Metazoa	0	0	0	0	0	0	0	0	0	0	0	0	0	0	0	0	0	0	0	0	0	0	0	0	0	0	0	0	0	0	0	0	0	0	0	0	0	0	0	0	1	0	0	0	0
A0A226NFI9	UP000198323	Callipepla squamata	Chordata	Metazoa	0	0	0	0	0	0	0	0	0	0	0	0	0	0	0	0	0	0	0	0	0	0	0	0	0	0	0	0	0	0	0	0	0	0	0	0	0	0	0	0	1	0	0	0	0
A0A8S3UTC8	UP000683360	Mytilus edulis	Mollusca	Metazoa	0	0	0	0	0	0	0	0	0	0	0	0	0	0	0	0	0	0	0	0	0	0	0	0	0	0	0	0	0	0	0	0	0	0	0	0	0	0	0	0	1	0	0	0	0
A0A8S3SPZ2	UP000683360	Mytilus edulis	Mollusca	Metazoa	0	0	0	0	0	0	0	0	0	0	0	0	0	0	0	0	0	0	0	0	0	0	0	0	0	0	0	0	0	0	0	0	0	0	0	0	0	0	0	0	0	0	0	0	0
A0A8S3PSI2	UP000683360	Mytilus edulis	Mollusca	Metazoa	0	0	0	0	0	0	0	0	0	0	0	0	0	0	0	0	0	0	0	0	0	0	0	0	0	0	0	0	0	0	0	0	0	0	0	0	0	0	0	0	1	0	0	0	0
A0A0M4E8K5	UP000494163	Drosophila busckii	Arthropoda	Metazoa	0	0	0	0	0	0	0	0	0	0	0	0	0	0	0	0	0	0	0	0	0	0	0	0	0	0	0	0	0	0	0	0	0	0	0	0	0	0	0	0	1	0	0	0	0
A0A836F3Z3	UP000668214	Pseudoatta argentina	Arthropoda	Metazoa	0	0	0	0	0	0	0	0	0	0	0	0	0	0	0	0	0	0	0	0	0	0	0	0	0	0	0	0	0	0	0	0	0	0	0	0	0	0	0	0	1	0	0	0	0
A0A836GD76	UP000669903	Acromyrmex charruanus	Arthropoda	Metazoa	0	0	0	0	0	0	0	0	0	0	0	0	0	0	0	0	0	0	0	0	0	0	0	0	0	0	0	0	0	0	0	0	0	0	0	0	0	0	0	0	1	0	0	0	0
A0A836GA53	UP000669903	Acromyrmex charruanus	Arthropoda	Metazoa	0	0	0	0	0	0	0	0	0	0	0	0	0	0	0	0	0	0	0	0	0	0	0	0	0	0	0	0	0	0	0	0	0	0	0	0	0	0	0	0	1	0	0	0	0
B4KHC1	UP000009192	Drosophila mojavensis	Arthropoda	Metazoa	0	0	0	0	0	0	0	0	0	0	0	0	0	0	0	0	0	0	0	0	0	0	0	0	0	0	0	0	0	0	0	0	0	0	0	0	0	0	0	0	1	0	0	0	0
B4MUA1	UP000007798	Drosophila willistoni	Arthropoda	Metazoa	0	0	0	0	0	0	0	0	0	0	0	0	0	0	0	0	0	0	0	0	0	0	0	0	0	0	0	0	0	0	0	0	0	0	0	0	0	0	0	0	1	0	0	0	0
B4MUA0	UP000007798	Drosophila willistoni	Arthropoda	Metazoa	0	0	0	0	0	0	0	0	0	0	0	0	0	0	0	0	0	0	0	0	0	0	0	0	0	0	0	0	0	0	0	0	0	0	0	0	0	0	0	0	1	0	0	0	0
A0A484BHM0	UP000295192	Drosophila navojoa	Arthropoda	Metazoa	0	0	0	0	0	0	0	0	0	0	0	0	0	0	0	0	0	0	0	0	0	0	0	0	0	0	0	0	0	0	0	0	0	0	0	0	0	0	0	0	1	0	0	0	0
B3MJZ7	UP000007801	Drosophila ananassae	Arthropoda	Metazoa	0	0	0	0	0	0	0	0	0	0	0	0	0	0	0	0	0	0	0	0	0	0	0	0	0	0	0	0	0	0	0	0	0	0	0	0	0	0	0	0	1	0	0	0	0
B4LV39	UP000008792	Drosophila virilis	Arthropoda	Metazoa	0	0	0	0	0	0	0	0	0	0	0	0	0	0	0	0	0	0	0	0	0	0	0	0	0	0	0	0	0	0	0	0	0	0	0	0	0	0	0	0	1	0	0	0	0
A0A835GCC8	UP000648187	Spodoptera exigua	Arthropoda	Metazoa	0	0	0	0	0	0	0	0	0	0	0	0	0	0	0	0	0	0	0	0	0	0	0	0	0	0	0	0	0	0	0	0	0	0	0	0	0	0	0	0	1	0	0	0	0
C9E0T3	UP000005203	Apis mellifera	Arthropoda	Metazoa	0	0	0	0	0	0	0	0	0	0	0	0	0	0	0	0	0	0	0	0	0	0	0	0	0	0	0	0	0	0	0	0	0	0	0	0	0	0	0	0	1	0	0	0	0
A0A482V7Y9	UP000292052	Asbolus verrucosus	Arthropoda	Metazoa	0	0	0	0	0	0	0	0	0	0	0	0	0	0	0	0	0	0	0	0	0	0	0	0	0	0	0	0	0	0	0	0	0	0	0	0	0	0	0	0	1	0	0	0	0
A0A8J2MKS2	UP000786811	Cotesia congregata	Arthropoda	Metazoa	0	0	0	0	0	0	0	0	0	0	0	0	0	0	0	0	0	0	0	0	0	0	0	0	0	0	0	0	0	0	0	0	0	0	0	0	0	0	0	0	1	0	0	0	0
A0A8J2MJR5	UP000786811	Cotesia congregata	Arthropoda	Metazoa	0	0	0	0	0	0	0	0	0	0	0	0	0	0	0	0	0	0	0	0	0	0	0	0	0	0	0	0	0	0	0	0	0	0	0	0	0	0	0	0	1	0	0	0	0
A0A7M7SRK0	UP000005203	Apis mellifera	Arthropoda	Metazoa	0	0	0	0	0	0	0	0	0	0	0	0	0	0	0	0	0	0	0	0	0	0	0	0	0	0	0	0	0	0	0	0	0	0	0	0	0	0	0	0	1	0	0	0	0
A0A212FEI4	UP000007151	Danaus plexippus	Arthropoda	Metazoa	0	0	0	0	0	0	0	0	0	0	0	0	0	0	0	0	0	0	0	0	0	0	0	0	0	0	0	0	0	0	0	0	0	0	0	0	0	0	0	0	1	0	0	0	0
A0A7S5HGM6	UP001152759	Bemisia tabaci	Arthropoda	Metazoa	0	0	0	0	0	0	0	0	0	0	0	0	0	0	0	0	0	0	0	0	0	0	0	0	0	0	0	0	0	0	0	0	0	0	0	0	0	0	0	0	1	0	0	0	0
A0A162CIA6	UP000076858	Daphnia magna	Arthropoda	Metazoa	0	0	0	0	0	0	0	0	0	0	0	0	0	0	0	0	0	0	0	0	0	0	0	0	0	0	0	0	0	0	0	0	0	0	0	0	0	0	0	0	1	0	0	0	0
E9GBD5	UP000000305	Daphnia pulex	Arthropoda	Metazoa	0	0	0	0	0	0	0	0	0	0	0	0	0	0	0	0	0	0	0	0	0	0	0	0	0	0	0	0	0	0	0	0	0	0	0	0	0	0	0	0	1	0	0	0	0
E9GBD4	UP000000305	Daphnia pulex	Arthropoda	Metazoa	0	0	0	0	0	0	0	0	0	0	0	0	0	0	0	0	0	0	0	0	0	0	0	0	0	0	0	0	0	0	0	0	0	0	0	0	0	0	0	0	1	0	0	0	0
A0A0K0JAD9	UP000006672	Brugia malayi	Nematoda	Metazoa	0	0	0	0	0	0	0	0	0	0	0	0	0	0	0	0	0	0	0	0	0	0	0	0	0	0	0	0	0	0	0	0	0	0	0	0	0	0	0	0	0	0	0	0	0
A0A0J9XW21	UP000006672	Brugia malayi	Nematoda	Metazoa	0	0	0	0	0	0	0	0	0	0	0	0	0	0	0	0	0	0	0	0	0	0	0	0	0	0	0	0	0	0	0	0	0	0	0	0	0	0	0	0	1	0	0	0	0
A0A1P6BJP2	UP000006672	Brugia malayi	Nematoda	Metazoa	0	0	0	0	0	0	0	0	0	0	0	0	0	0	0	0	0	0	0	0	0	0	0	0	0	0	0	0	0	0	0	0	0	0	0	0	0	0	0	0	1	0	0	0	0
A0A0H5S7K5	UP000006672	Brugia malayi	Nematoda	Metazoa	0	0	0	0	0	0	0	0	0	0	0	0	0	0	0	0	0	0	0	0	0	0	0	0	0	0	0	0	0	0	0	0	0	0	0	0	0	0	0	0	1	0	0	0	0
A0A9P1A6B4	UP001153352	Caenorhabditis sp. 36 PRJEB53466	Nematoda	Metazoa	0	0	0	0	0	0	0	0	1	0	0	0	0	0	0	0	0	0	0	0	0	0	0	0	0	0	0	0	0	0	0	0	0	0	0	0	0	0	0	0	1	0	0	0	0
A0AA36C680	UP001177023	Mesorhabditis spiculigera	Nematoda	Metazoa	0	0	0	0	0	0	0	0	0	0	1	0	0	0	0	0	0	0	0	0	0	0	0	0	0	0	0	0	0	0	0	0	0	0	0	0	0	0	0	0	0	0	0	0	0
G0NYP7	UP000008068	Caenorhabditis brenneri	Nematoda	Metazoa	0	0	0	0	0	0	0	0	0	0	0	1	0	0	0	0	0	0	0	0	0	0	0	0	0	0	0	0	0	0	0	0	0	0	0	0	0	0	0	0	0	0	0	0	0
G0MAJ1	UP000008068	Caenorhabditis brenneri	Nematoda	Metazoa	0	0	0	0	0	0	0	0	0	0	0	0	0	0	0	0	0	0	0	0	0	0	0	0	0	0	0	0	0	0	0	0	0	0	0	0	0	0	0	0	1	0	0	0	0
G0NAD5	UP000008068	Caenorhabditis brenneri	Nematoda	Metazoa	0	0	0	0	0	0	0	0	0	0	0	0	0	0	0	0	0	0	0	0	0	0	0	0	0	0	0	0	0	0	0	0	0	0	0	0	0	0	0	0	0	0	0	0	0
G0NYX5	UP000008068	Caenorhabditis brenneri	Nematoda	Metazoa	0	0	0	0	0	0	0	0	0	0	0	0	0	0	0	0	0	0	0	0	0	0	0	0	0	0	0	0	0	0	0	0	0	0	0	0	0	0	0	0	0	0	0	0	0
A0A1J1HRI1	UP000183832	Clunio marinus	Arthropoda	Metazoa	0	0	0	0	0	0	0	0	0	0	0	0	0	0	0	0	0	0	0	0	0	0	0	0	0	0	0	0	0	0	0	0	0	0	0	0	0	0	0	0	1	0	0	0	0
A0A1J1HTC0	UP000183832	Clunio marinus	Arthropoda	Metazoa	0	0	0	0	0	0	0	0	0	0	0	0	0	0	0	0	0	0	0	0	0	0	0	0	0	0	0	0	0	0	0	0	0	0	0	0	0	0	0	0	1	0	0	0	0
A0A1J1HZG9	UP000183832	Clunio marinus	Arthropoda	Metazoa	0	0	0	0	0	0	0	0	0	0	0	0	0	0	0	0	0	0	0	0	0	0	0	0	0	0	0	0	0	0	0	0	0	0	0	0	0	0	0	0	1	0	0	0	0
A0A1J1ILB4	UP000183832	Clunio marinus	Arthropoda	Metazoa	0	0	0	0	0	0	0	0	0	0	0	0	0	0	0	0	0	0	0	0	0	0	0	0	0	0	0	0	0	0	0	0	0	0	0	0	0	0	0	0	1	0	0	0	0
A0A1J1IPY0	UP000183832	Clunio marinus	Arthropoda	Metazoa	0	0	0	0	0	0	0	0	0	0	0	0	0	0	0	0	0	0	0	0	0	0	0	0	0	0	0	0	0	0	0	0	0	0	0	0	0	0	0	0	1	0	0	0	0
A0A1J1IW48	UP000183832	Clunio marinus	Arthropoda	Metazoa	0	0	0	0	0	0	0	0	0	0	0	0	0	0	0	0	0	0	0	0	0	0	0	0	0	0	0	0	0	0	0	0	0	0	0	0	0	0	0	0	1	0	0	0	0
A0A1J1J0G6	UP000183832	Clunio marinus	Arthropoda	Metazoa	0	0	0	0	0	0	0	0	0	0	0	0	0	0	0	0	0	0	0	0	0	0	0	0	0	0	0	0	0	0	0	0	0	0	0	0	0	0	0	0	1	0	0	0	0
A0A1J1J0Z3	UP000183832	Clunio marinus	Arthropoda	Metazoa	0	0	0	0	0	0	0	0	0	0	0	0	0	0	0	0	0	0	0	0	0	0	0	0	0	0	0	0	0	0	0	0	0	0	0	0	0	0	0	0	0	0	0	0	0
A0A1J1JBJ0	UP000183832	Clunio marinus	Arthropoda	Metazoa	0	0	0	0	0	0	0	0	0	0	0	0	0	0	0	0	0	0	0	0	0	0	0	0	0	0	0	0	0	0	0	0	0	0	0	0	0	0	0	0	1	0	0	0	0
B7PDV6	UP000001555	Ixodes scapularis	Arthropoda	Metazoa	0	0	0	0	0	0	0	0	0	0	0	0	0	0	0	0	0	0	0	0	0	0	0	0	0	0	0	0	0	0	0	0	0	0	0	0	0	0	0	0	1	0	0	0	0
B7QEM1	UP000001555	Ixodes scapularis	Arthropoda	Metazoa	0	0	0	0	0	0	0	0	0	0	0	0	0	0	0	0	0	0	0	0	0	0	0	0	0	0	0	0	0	0	0	0	0	0	0	0	0	0	0	0	0	0	0	0	0
B7Q5I1	UP000001555	Ixodes scapularis	Arthropoda	Metazoa	0	0	0	0	0	0	0	0	0	0	0	0	0	0	0	0	0	0	0	0	0	0	0	0	0	0	0	0	0	0	0	0	0	0	0	0	0	0	0	0	1	0	0	0	0
E3ME63	UP000008281	Caenorhabditis remanei	Nematoda	Metazoa	0	0	0	0	0	0	0	0	0	0	0	0	0	0	0	0	0	0	0	0	0	0	0	0	0	0	0	0	0	0	0	0	0	0	0	0	0	0	0	0	1	0	0	0	0
E3M6J3	UP000008281	Caenorhabditis remanei	Nematoda	Metazoa	0	0	0	0	0	0	0	0	0	0	0	0	0	0	0	0	0	0	0	0	0	0	0	0	0	0	0	0	0	0	0	0	0	0	0	0	0	0	0	0	0	0	0	0	0
E3LKP0	UP000008281	Caenorhabditis remanei	Nematoda	Metazoa	0	0	0	0	0	0	0	0	0	0	0	0	0	0	0	0	0	0	0	0	0	0	0	0	0	0	0	0	0	0	0	0	0	0	0	0	0	0	0	0	1	0	0	0	0
E3MGH7	UP000008281	Caenorhabditis remanei	Nematoda	Metazoa	0	0	0	0	0	0	0	0	0	0	0	0	0	0	0	0	0	0	0	0	0	0	0	0	0	0	0	0	0	0	0	0	0	0	0	0	0	0	0	0	1	0	0	0	0
E3NFG2	UP000008281	Caenorhabditis remanei	Nematoda	Metazoa	0	0	0	0	0	0	0	0	0	0	0	0	0	0	0	0	0	0	0	0	0	0	0	0	0	0	0	0	0	0	0	0	0	0	0	0	0	0	0	0	1	0	0	0	0
E3NAX2	UP000008281	Caenorhabditis remanei	Nematoda	Metazoa	0	0	0	0	0	0	0	0	0	0	0	0	0	0	0	0	0	0	0	0	0	0	0	0	0	0	0	0	0	0	1	0	0	0	0	0	0	0	0	0	0	0	0	0	0
E3LUQ7	UP000008281	Caenorhabditis remanei	Nematoda	Metazoa	0	0	0	0	0	0	0	0	0	0	0	0	0	0	0	0	0	0	0	0	0	0	0	0	0	0	0	0	0	0	0	0	0	0	0	0	0	0	0	0	1	0	0	0	0
A0A7I8W6Q9	UP000549394	Dimorphilus gyrociliatus	Annelida	Metazoa	0	0	0	0	0	0	0	0	0	0	0	0	0	0	0	0	0	0	0	0	0	0	0	0	0	0	0	0	0	0	0	0	0	0	0	0	0	0	0	0	1	0	0	0	0
A0A7I8W797	UP000549394	Dimorphilus gyrociliatus	Annelida	Metazoa	0	0	0	0	0	0	0	0	0	0	0	0	0	0	0	0	0	0	0	0	0	0	0	0	0	0	0	0	0	0	0	0	0	0	0	0	0	0	0	0	1	0	0	0	0
A0A7I8VTT3	UP000549394	Dimorphilus gyrociliatus	Annelida	Metazoa	0	0	0	0	0	0	0	0	0	0	0	0	0	0	0	0	0	0	0	0	0	0	0	0	0	0	0	0	0	0	0	0	0	0	0	0	0	0	0	0	1	0	0	0	0
A0A9W7WH07	UP001059041	Triplophysa rosa	Chordata	Metazoa	0	0	0	0	0	0	0	0	0	0	0	0	0	0	0	0	0	0	0	0	0	0	0	0	0	0	0	0	0	0	0	0	0	0	0	0	0	0	0	0	1	0	0	0	0
A0A8P4JY84	UP000694389	Dicentrarchus labrax	Chordata	Metazoa	0	0	0	0	0	0	0	0	0	0	0	0	0	0	0	0	0	0	0	0	0	0	0	0	0	0	0	0	0	0	0	0	0	0	0	0	0	0	0	0	1	0	0	0	0
A0A484CKD9	UP000295070	Perca flavescens	Chordata	Metazoa	0	0	0	0	0	0	0	0	0	0	0	0	0	0	0	0	0	0	0	0	0	0	0	0	0	0	0	0	0	0	0	0	0	0	0	0	0	0	0	0	1	0	0	0	0
A0A9D3PDR9	UP001046870	Megalops atlanticus	Chordata	Metazoa	0	0	0	0	0	0	0	0	0	0	0	0	0	0	0	0	0	0	0	0	0	0	0	0	0	0	0	0	0	0	0	0	0	0	0	0	0	0	0	0	1	0	0	0	0
A0A9N7UEG5	UP001153269	Pleuronectes platessa	Chordata	Metazoa	0	0	0	0	0	0	0	0	0	0	0	0	0	0	0	0	0	0	0	0	0	0	0	0	0	0	0	0	0	0	0	0	0	0	0	0	0	0	0	0	1	0	0	0	0
A0A8T3DFM2	UP000829720	Albula goreensis	Chordata	Metazoa	0	0	0	0	0	0	0	0	0	0	0	0	0	0	0	0	0	0	0	0	0	0	0	0	0	0	0	0	0	0	0	0	0	0	0	0	0	0	0	0	1	0	0	0	0
A0A9Q1E6T2	UP001152622	Synaphobranchus kaupii	Chordata	Metazoa	0	0	0	0	0	0	0	0	0	0	0	0	0	0	0	0	0	0	0	0	0	0	0	0	0	0	0	0	0	0	0	0	0	0	0	0	0	0	0	0	1	0	0	0	0
A0A9Q1DEF4	UP001152803	Conger conger	Chordata	Metazoa	0	0	0	0	0	0	0	0	0	0	0	0	0	0	0	0	0	0	0	0	0	0	0	0	0	0	0	0	0	0	0	0	0	0	0	0	0	0	0	0	1	0	0	0	0
A0A9Q1E9Q2	UP001152622	Synaphobranchus kaupii	Chordata	Metazoa	0	0	0	0	0	0	0	0	0	0	0	0	0	0	0	0	0	0	0	0	0	0	0	0	0	0	0	0	0	0	0	0	0	0	0	0	0	0	0	0	1	0	0	0	0
A0A1S4H7D2	UP000007062	Anopheles gambiae	Arthropoda	Metazoa	0	0	0	0	0	0	0	0	0	0	0	0	0	0	0	0	0	0	0	0	0	0	0	0	0	0	0	0	0	0	0	0	0	0	0	0	0	0	0	0	1	0	0	0	0
W5JJN9	UP000000673	Anopheles darlingi	Arthropoda	Metazoa	0	0	0	0	0	0	0	0	0	0	0	0	0	0	0	0	0	0	0	0	0	0	0	0	0	0	0	0	0	0	0	0	0	0	0	0	0	0	0	0	1	0	0	0	0
A0A2G8KMY9	UP000230750	Apostichopus japonicus	Echinodermata	Metazoa	0	0	0	0	0	0	0	0	0	0	0	0	0	0	0	0	0	0	0	0	0	0	0	0	0	0	0	0	0	0	0	0	0	0	0	0	0	0	0	0	1	0	0	0	0
B0WFU8	UP000002320	Culex quinquefasciatus	Arthropoda	Metazoa	0	0	0	0	0	0	0	0	0	0	0	0	0	0	0	0	0	0	0	0	0	0	0	0	0	0	0	0	0	0	0	0	0	0	0	0	0	0	0	0	1	0	0	0	0
E2BDN9	UP000008237	Harpegnathos saltator	Arthropoda	Metazoa	0	0	0	0	0	0	0	0	0	0	0	0	0	0	0	0	0	0	0	0	0	0	0	0	0	0	0	0	0	0	0	0	0	0	0	0	0	0	0	0	1	0	0	0	0
E2AWJ9	UP000000311	Camponotus floridanus	Arthropoda	Metazoa	0	0	0	0	0	0	0	0	0	0	0	0	0	0	0	0	0	0	0	0	0	0	0	0	0	0	0	0	0	0	0	0	0	0	0	0	0	0	0	0	1	0	0	0	0
A0A3M7PGN9	UP000276133	Brachionus plicatilis	Rotifera	Metazoa	0	0	0	0	0	0	0	0	0	0	0	0	0	0	0	0	0	0	0	0	0	0	0	0	0	0	0	0	0	0	0	0	0	0	0	0	0	0	0	0	1	0	0	0	0
B0X641	UP000002320	Culex quinquefasciatus	Arthropoda	Metazoa	0	0	0	0	0	0	0	0	0	0	0	0	0	0	0	0	0	0	0	0	0	0	0	0	0	0	0	0	0	0	0	0	0	0	0	0	0	0	0	0	1	0	0	0	0
E2BAF4	UP000008237	Harpegnathos saltator	Arthropoda	Metazoa	0	0	0	0	0	0	0	0	0	0	0	0	0	0	0	0	0	0	0	0	0	0	0	0	0	0	0	0	0	0	0	0	0	0	0	0	0	0	0	0	1	0	0	0	0
E2A5A6	UP000000311	Camponotus floridanus	Arthropoda	Metazoa	0	0	0	0	0	0	0	0	0	0	0	0	0	0	0	0	0	0	0	0	0	0	0	0	0	0	0	0	0	0	0	0	0	0	0	0	0	0	0	0	1	0	0	0	0
E2C544	UP000008237	Harpegnathos saltator	Arthropoda	Metazoa	0	0	0	0	0	0	0	0	0	0	0	0	0	0	0	0	0	0	0	0	0	0	0	0	0	0	0	0	0	0	0	0	0	0	0	0	0	0	0	0	1	0	0	0	0
A0AA88M580	UP001187415	Channa striata	Chordata	Metazoa	0	0	0	0	0	0	0	0	0	0	0	0	0	0	0	0	0	0	0	0	0	0	0	0	0	0	0	0	0	0	0	0	0	0	0	0	0	0	0	0	1	0	0	0	0
A0A9Q0X736	UP001142489	Phrynocephalus forsythii	Chordata	Metazoa	0	0	0	0	0	0	0	0	0	0	0	0	0	0	0	0	0	0	0	0	0	0	0	0	0	0	0	0	0	0	0	0	0	0	0	0	0	0	0	0	1	0	0	0	0
A0A9Q1E416	UP001152803	Conger conger	Chordata	Metazoa	0	0	0	0	0	0	0	0	0	0	0	0	0	0	0	0	0	0	0	0	0	0	0	0	0	0	0	0	0	0	0	0	0	0	0	0	0	0	0	0	1	0	0	0	0
A0A803XSE2	UP000001645	Meleagris gallopavo	Chordata	Metazoa	0	0	0	0	0	0	0	0	0	0	0	0	0	0	0	0	0	0	0	0	0	0	0	0	0	0	0	0	0	0	0	0	0	0	0	0	0	0	0	0	1	0	0	0	0
A0A9N7VDB5	UP001153269	Pleuronectes platessa	Chordata	Metazoa	0	0	0	0	0	0	0	0	0	0	0	0	0	0	0	0	0	0	0	0	0	0	0	0	0	0	0	0	0	0	0	0	0	0	0	0	0	0	0	0	1	0	0	0	0
A0A443SKH3	UP000288716	Leptotrombidium deliense	Arthropoda	Metazoa	0	0	0	0	0	0	0	0	0	0	0	0	0	0	0	0	0	0	0	0	0	0	0	0	0	0	0	0	0	0	0	0	0	0	0	0	0	0	0	0	0	0	0	0	0
E0W4C3	UP000009046	Pediculus humanus	Arthropoda	Metazoa	0	0	0	0	0	0	0	0	0	0	0	0	0	0	0	0	0	0	0	0	0	0	0	0	0	0	0	0	0	0	0	0	0	0	0	0	0	0	0	0	1	0	0	0	0
B7QBT5	UP000001555	Ixodes scapularis	Arthropoda	Metazoa	0	0	0	0	0	0	0	0	0	0	0	0	0	0	0	0	0	0	0	0	0	0	0	0	0	0	0	0	0	0	0	0	0	0	0	0	0	0	0	0	0	0	0	0	0
G0NTP1	UP000008068	Caenorhabditis brenneri	Nematoda	Metazoa	0	0	0	0	0	0	0	0	0	0	0	0	0	0	0	0	0	0	0	0	1	0	0	0	0	0	0	0	0	0	0	0	0	0	0	0	0	0	0	0	0	0	0	0	0
A0A819UBZ7	UP000663866	Rotaria magnacalcarata	Rotifera	Metazoa	0	0	0	0	0	0	0	0	0	0	0	0	0	0	0	0	0	0	0	0	1	0	0	0	0	0	0	0	0	0	0	0	0	0	0	0	0	0	0	0	0	0	0	0	0
A0A9P1ANB4	UP001153352	Caenorhabditis sp. 36 PRJEB53466	Nematoda	Metazoa	0	0	0	0	0	0	0	0	0	0	0	0	0	0	0	0	0	0	0	0	0	1	0	0	0	0	0	0	0	0	0	0	0	0	0	0	0	0	0	0	0	0	0	0	0
B4Q9X4	UP000000304	Drosophila simulans	Arthropoda	Metazoa	0	0	0	0	0	0	0	0	0	0	0	0	0	0	0	0	0	0	0	0	0	0	0	0	0	0	0	0	0	0	0	0	0	0	0	0	0	0	0	0	1	0	0	0	0
B4Q9X1	UP000000304	Drosophila simulans	Arthropoda	Metazoa	0	0	0	0	0	0	0	0	0	0	0	0	0	0	0	0	0	0	0	0	0	0	0	0	0	0	0	0	0	0	0	0	0	0	0	0	0	0	0	0	1	0	0	0	0
B4NVX8	UP000000304	Drosophila simulans	Arthropoda	Metazoa	0	0	0	0	0	0	0	0	0	0	0	0	0	0	0	0	0	0	0	0	0	0	0	0	0	0	0	0	0	0	0	0	0	0	0	0	0	0	0	0	0	0	0	0	0
A0A0B2UVH5	UP000031036	Toxocara canis	Nematoda	Metazoa	0	0	0	0	0	0	0	0	0	0	0	0	0	0	0	0	0	0	0	0	0	0	0	0	0	0	0	0	0	0	0	0	0	0	0	0	0	0	0	0	0	0	0	0	0
A0A0B2VTC4	UP000031036	Toxocara canis	Nematoda	Metazoa	0	0	0	0	0	0	0	0	0	0	0	0	0	0	0	0	0	0	0	0	0	0	0	0	0	0	0	0	0	0	0	0	0	0	0	0	0	0	0	0	1	0	0	0	0
A0A0B2UPI1	UP000031036	Toxocara canis	Nematoda	Metazoa	0	0	0	0	0	0	0	0	0	0	0	0	0	0	0	0	0	0	0	0	0	0	0	0	0	0	0	0	0	0	0	0	0	0	0	0	0	0	0	0	0	0	0	0	0
A0A0B2VHB9	UP000031036	Toxocara canis	Nematoda	Metazoa	0	0	0	0	0	0	0	0	0	0	0	0	0	0	0	0	0	0	0	0	0	0	0	0	0	0	0	0	0	0	0	0	0	0	0	0	0	0	0	0	0	0	0	0	0
A0A0B2UUD4	UP000031036	Toxocara canis	Nematoda	Metazoa	0	0	0	0	0	0	0	0	0	0	0	0	0	0	0	0	0	0	0	0	0	0	0	0	0	0	0	0	0	0	0	0	0	0	0	0	0	0	0	0	2	0	0	0	0
A0A0B2UL82	UP000031036	Toxocara canis	Nematoda	Metazoa	0	0	0	0	0	0	0	0	0	0	0	0	0	0	0	0	0	0	0	0	0	0	0	0	0	0	0	0	0	0	0	0	0	0	0	0	0	0	0	0	0	0	0	0	0
A0A9P0B9L8	UP001154078	Brassicogethes aeneus	Arthropoda	Metazoa	0	0	0	0	0	0	0	0	0	0	0	0	0	0	0	0	0	0	0	0	0	0	0	0	0	0	0	0	0	0	0	0	0	0	0	0	0	0	0	0	1	0	0	0	0
A0AA88HPK0	UP001187531	Artemia franciscana	Arthropoda	Metazoa	0	0	0	0	0	0	0	0	0	0	0	0	0	0	0	0	0	0	0	0	0	0	0	0	0	0	0	0	0	0	0	0	0	0	0	0	0	0	0	0	1	0	0	0	0
B4JBE1	UP000001070	Drosophila grimshawi	Arthropoda	Metazoa	0	0	0	0	0	0	0	0	0	0	0	0	0	0	0	0	0	0	0	0	0	0	0	0	0	0	0	0	0	0	0	0	0	0	0	0	0	0	0	0	1	0	0	0	0
B4JBE4	UP000001070	Drosophila grimshawi	Arthropoda	Metazoa	0	0	0	0	0	0	0	0	0	0	0	0	0	0	0	0	0	0	0	0	0	0	0	0	0	0	0	0	0	0	0	0	0	0	0	0	0	0	0	0	1	0	0	0	0
B4JP35	UP000001070	Drosophila grimshawi	Arthropoda	Metazoa	0	0	0	0	0	0	0	0	0	0	0	0	0	0	0	0	0	0	0	0	0	0	0	0	0	0	0	0	0	0	0	0	0	0	0	0	0	0	0	0	1	0	0	0	0
B4IWV1	UP000001070	Drosophila grimshawi	Arthropoda	Metazoa	0	0	0	0	0	0	0	0	0	0	0	0	0	0	0	0	0	0	0	0	0	0	0	0	0	0	0	0	0	0	0	0	0	0	0	0	0	0	0	0	1	0	0	0	0
B4JW20	UP000001070	Drosophila grimshawi	Arthropoda	Metazoa	0	0	0	0	0	0	0	0	0	0	0	0	0	0	0	0	0	0	0	0	0	0	0	0	0	0	0	0	0	0	0	0	0	0	0	0	0	0	0	0	1	0	0	0	0
B4GTA5	UP000008744	Drosophila persimilis	Arthropoda	Metazoa	0	0	0	0	0	0	0	0	0	0	0	0	0	0	0	0	0	0	0	0	0	0	0	0	0	0	0	0	0	0	0	0	0	0	0	0	0	0	0	0	1	0	0	0	0
B4GTA6	UP000008744	Drosophila persimilis	Arthropoda	Metazoa	0	0	0	0	0	0	0	0	0	0	0	0	0	0	0	0	0	0	0	0	0	0	0	0	0	0	0	0	0	0	0	0	0	0	0	0	0	0	0	0	1	0	0	0	0
B4GTA7	UP000008744	Drosophila persimilis	Arthropoda	Metazoa	0	0	0	0	0	0	0	0	0	0	0	0	0	0	0	0	0	0	0	0	0	0	0	0	0	0	0	0	0	0	0	0	0	0	0	0	0	0	0	0	1	0	0	0	0
B4GGS7	UP000008744	Drosophila persimilis	Arthropoda	Metazoa	0	0	0	0	0	0	0	0	0	0	0	0	0	0	0	0	0	0	0	0	0	0	0	0	0	0	0	0	0	0	0	0	0	0	0	0	0	0	0	0	1	0	0	0	0
B4G6N7	UP000008744	Drosophila persimilis	Arthropoda	Metazoa	0	0	0	0	0	0	0	0	0	0	0	0	0	0	0	0	0	0	0	0	0	0	0	0	0	0	0	0	0	0	0	0	0	0	0	0	0	0	0	0	0	0	0	0	0
B4G753	UP000008744	Drosophila persimilis	Arthropoda	Metazoa	0	0	0	0	0	0	0	0	0	0	0	0	0	0	0	0	0	0	0	0	0	0	0	0	0	0	0	0	0	0	0	0	0	0	0	0	0	0	0	0	1	0	0	0	0
B4G765	UP000008744	Drosophila persimilis	Arthropoda	Metazoa	0	0	0	0	0	0	0	0	0	0	0	0	0	0	0	0	0	0	0	0	0	0	0	0	0	0	0	0	0	0	0	0	0	0	0	0	0	0	0	0	1	0	0	0	0
B4ISF4	UP000008744	Drosophila persimilis	Arthropoda	Metazoa	0	0	0	0	0	0	0	0	0	0	0	0	0	0	0	0	0	0	0	0	0	0	0	0	0	0	0	0	0	0	0	0	0	0	0	0	0	0	0	0	0	0	0	0	0
B4G6N0	UP000008744	Drosophila persimilis	Arthropoda	Metazoa	0	0	0	0	0	0	0	0	0	0	0	0	0	0	0	0	0	0	0	0	0	0	0	0	0	0	0	0	0	0	0	0	0	0	0	0	0	0	0	0	1	0	0	0	0
B4GDQ8	UP000008744	Drosophila persimilis	Arthropoda	Metazoa	0	0	0	0	0	0	0	0	0	0	0	0	0	0	0	0	0	0	0	0	0	0	0	0	0	0	0	0	0	0	0	0	0	0	0	0	0	0	0	0	1	0	0	0	0
B4GFG0	UP000008744	Drosophila persimilis	Arthropoda	Metazoa	0	0	0	0	0	0	0	0	0	0	0	0	0	0	0	0	0	0	0	0	0	0	0	0	0	0	0	0	0	0	0	0	0	0	0	0	0	0	0	0	1	0	0	0	0
B4GDQ6	UP000008744	Drosophila persimilis	Arthropoda	Metazoa	0	0	0	0	0	0	0	0	0	0	0	0	0	0	0	0	0	0	0	0	0	0	0	0	0	0	0	0	0	0	0	0	0	0	0	0	0	0	0	0	1	0	0	0	0
B4H1E3	UP000008744	Drosophila persimilis	Arthropoda	Metazoa	0	0	0	0	0	0	0	0	0	0	0	0	0	0	0	0	0	0	0	0	0	0	0	0	0	0	0	0	0	0	0	0	0	0	0	0	0	0	0	0	0	0	0	0	0
B4HDJ4	UP000008744	Drosophila persimilis	Arthropoda	Metazoa	0	0	0	0	0	0	0	0	0	0	0	0	0	0	0	0	0	0	0	0	0	0	0	0	0	0	0	0	0	0	0	0	0	0	0	0	0	0	0	0	0	0	0	0	0
B4GUA7	UP000008744	Drosophila persimilis	Arthropoda	Metazoa	0	0	0	0	0	0	0	0	0	0	0	0	0	0	0	0	0	0	0	0	0	0	0	0	0	0	0	0	0	0	0	0	0	0	0	0	0	0	0	0	1	0	0	0	0
A0A482V7V2	UP000292052	Asbolus verrucosus	Arthropoda	Metazoa	0	0	0	0	0	0	0	0	0	0	0	0	0	0	0	0	0	0	0	0	0	0	0	0	0	0	0	0	0	0	0	0	0	0	0	0	0	0	0	0	1	0	0	0	0
A0AAF3F1X2	UP000887575	Mesorhabditis belari	Nematoda	Metazoa	0	0	0	0	0	0	0	0	0	0	0	0	0	0	0	0	0	0	0	0	0	0	0	0	0	0	0	0	0	0	0	0	0	0	0	0	0	0	0	0	1	0	0	0	0
B4HWZ3	UP000001292	Drosophila sechellia	Arthropoda	Metazoa	0	0	0	0	0	0	0	0	0	0	0	0	0	0	0	0	0	0	0	0	0	0	0	0	0	0	0	0	0	0	0	0	0	0	0	0	0	0	0	0	1	0	0	0	0
B4HWY9	UP000001292	Drosophila sechellia	Arthropoda	Metazoa	0	0	0	0	0	0	0	0	0	0	0	0	0	0	0	0	0	0	0	0	0	0	0	0	0	0	0	0	0	0	0	0	0	0	0	0	0	0	0	0	1	0	0	0	0
B4INL3	UP000001292	Drosophila sechellia	Arthropoda	Metazoa	0	0	0	0	0	0	0	0	0	0	0	0	0	0	0	0	0	0	0	0	0	0	0	0	0	0	0	0	0	0	0	0	0	0	0	0	0	0	0	0	1	0	0	0	0
B4HIG2	UP000001292	Drosophila sechellia	Arthropoda	Metazoa	0	0	0	0	0	0	0	0	0	0	0	0	0	0	0	0	0	0	0	0	0	0	0	0	0	0	0	0	0	0	0	0	0	0	0	0	0	0	0	0	0	0	0	0	0
A0A8S1CK90	UP000494165	Cloeon dipterum	Arthropoda	Metazoa	0	0	0	0	0	0	0	0	0	0	0	0	0	0	0	0	0	0	0	0	0	0	0	0	1	0	0	0	0	0	0	0	0	0	1	0	0	0	0	0	1	0	0	0	0
A0A8R1YJM0	UP000005239	Pristionchus pacificus	Nematoda	Metazoa	0	0	0	0	0	0	0	0	0	0	0	0	0	0	0	0	0	0	0	0	1	0	0	0	0	0	0	0	0	0	0	0	0	0	1	0	0	0	0	0	1	0	0	1	0
A0A815JQ46	UP000663832	Adineta steineri	Rotifera	Metazoa	0	0	0	0	0	0	0	0	0	0	0	0	0	0	0	0	0	0	0	0	0	0	0	0	0	0	0	0	0	0	0	0	0	0	1	0	0	0	0	0	1	0	0	0	0
A0A260Z417	UP000216463	Caenorhabditis latens	Nematoda	Metazoa	0	0	0	0	0	0	0	0	0	0	0	0	0	0	0	0	0	0	0	0	0	0	0	0	0	0	0	0	0	0	0	0	0	0	0	0	0	0	0	0	1	0	0	0	0
A8WWP9	UP000008549	Caenorhabditis briggsae	Nematoda	Metazoa	0	0	0	0	0	0	0	0	0	0	0	0	0	0	0	0	0	0	0	0	0	0	0	0	0	0	0	0	0	0	0	0	0	0	0	0	0	0	0	0	1	0	0	0	0
A0A8S4RII8	UP000838756	Pararge aegeria	Arthropoda	Metazoa	0	0	0	0	0	0	0	0	0	0	0	0	0	0	0	0	0	0	0	0	0	0	0	0	0	0	0	0	0	0	0	0	0	0	0	0	0	0	0	0	1	0	0	0	0
A0A8S4RBN4	UP000838756	Pararge aegeria	Arthropoda	Metazoa	0	0	0	0	0	0	0	0	0	0	0	0	0	0	0	0	0	0	0	0	0	0	0	0	0	0	0	0	0	0	0	0	0	0	0	0	0	0	0	0	1	0	0	0	0
A0A8S4QDK6	UP000838756	Pararge aegeria	Arthropoda	Metazoa	0	0	0	0	0	0	0	0	0	0	0	0	0	0	0	0	0	0	0	0	0	0	0	0	0	0	0	0	0	0	0	0	0	0	0	0	0	0	0	0	0	0	0	0	0
A0A8S4QTL8	UP000838756	Pararge aegeria	Arthropoda	Metazoa	0	0	0	0	0	0	0	0	0	0	0	0	0	0	0	0	0	0	0	0	0	0	0	0	0	0	0	0	0	0	0	0	0	0	0	0	0	0	0	0	0	0	0	0	0
A0A8S4SF90	UP000838756	Pararge aegeria	Arthropoda	Metazoa	0	0	0	0	0	0	0	0	0	0	0	0	0	0	0	0	0	0	0	0	0	0	0	0	0	0	0	0	0	0	0	0	0	0	0	0	0	0	0	0	1	0	0	0	0
A0A819VB39	UP000663866	Rotaria magnacalcarata	Rotifera	Metazoa	0	0	0	0	0	0	0	0	0	0	0	0	0	0	0	0	0	0	0	0	0	0	0	0	0	0	0	0	0	0	0	0	0	0	0	0	0	0	0	0	1	0	0	0	0
A0A485PSW7	UP000386466	Lynx pardinus	Chordata	Metazoa	0	0	0	0	0	0	0	0	0	0	0	0	0	0	0	0	0	0	0	0	0	0	0	0	0	0	0	0	0	0	0	0	0	0	0	0	0	0	0	0	1	0	0	0	0
A0A6P4YF76	UP000515135	Branchiostoma belcheri	Chordata	Metazoa	0	0	0	0	0	0	0	0	0	0	0	0	0	0	0	0	0	0	0	0	0	0	0	0	0	0	0	0	0	0	0	0	0	0	0	0	0	0	0	0	0	0	0	0	0
A0A7F8RG40	UP000245341	Leptonychotes weddellii	Chordata	Metazoa	0	0	0	0	0	0	0	0	0	0	0	0	0	0	0	0	0	0	0	0	0	0	0	0	0	0	0	0	0	0	0	0	0	0	0	0	0	0	0	0	1	0	0	0	0
A0A9B0H7H6	UP000245340	Odobenus rosmarus	Chordata	Metazoa	0	0	0	0	0	0	0	0	0	0	0	0	0	0	0	0	0	0	0	0	0	0	0	0	0	0	0	0	0	0	0	0	0	0	0	0	0	0	0	0	1	0	0	0	0
A0A8U0S6M8	UP000000715	Mustela putorius	Chordata	Metazoa	0	0	0	0	0	0	0	0	0	0	0	0	0	0	0	0	0	0	0	0	0	0	0	0	0	0	0	0	0	0	0	0	0	0	0	0	0	0	0	0	1	0	0	0	0
A0A8B8V3N1	UP000694857	Balaenoptera musculus	Chordata	Metazoa	0	0	0	0	0	0	0	0	0	0	0	0	0	0	0	0	0	0	0	0	0	0	0	0	0	0	0	0	0	0	0	0	0	0	0	0	0	0	0	0	1	0	0	0	0
A0A7F8KGV9	UP000248483	Delphinapterus leucas	Chordata	Metazoa	0	0	0	0	0	0	0	0	0	0	0	0	0	0	0	0	0	0	0	0	0	0	0	0	0	0	0	0	0	0	0	0	0	0	0	0	0	0	0	0	1	0	0	0	0
A0A2U4CJI1	UP000245320	Tursiops truncatus	Chordata	Metazoa	0	0	0	0	0	0	0	0	0	0	0	0	0	0	0	0	0	0	0	0	0	0	0	0	0	0	0	0	0	0	0	0	0	0	0	0	0	0	0	0	1	0	0	0	0
A0A341B5X3	UP000252040	Neophocaena asiaeorientalis	Chordata	Metazoa	0	0	0	0	0	0	0	0	0	0	0	0	0	0	0	0	0	0	0	0	0	0	0	0	0	0	0	0	0	0	0	0	0	0	0	0	0	0	0	0	1	0	0	0	0
A0A2Y9RKC5	UP000248480	Trichechus manatus	Chordata	Metazoa	0	0	0	0	0	0	0	0	0	0	0	0	0	0	0	0	0	0	0	0	0	0	0	0	0	0	0	0	0	0	0	0	0	0	0	0	0	0	0	0	0	0	0	0	0
A0A8B8YDC8	UP000694857	Balaenoptera musculus	Chordata	Metazoa	0	0	0	0	0	0	0	0	0	0	0	0	0	0	0	0	0	0	0	0	0	0	0	0	0	0	0	0	0	0	0	0	0	0	0	0	0	0	0	0	1	0	0	0	0
A0A3Q0DMC1	UP000189704	Carlito syrichta	Chordata	Metazoa	0	0	0	0	0	0	0	0	0	0	0	0	0	0	0	0	0	0	0	0	0	0	0	0	0	0	0	0	0	0	0	0	0	0	0	0	0	0	0	0	1	0	0	0	0
A0A6I9WWL0	UP000504615	Pogonomyrmex barbatus	Arthropoda	Metazoa	0	0	0	0	0	0	0	0	0	0	0	0	0	0	0	0	0	0	0	0	0	0	0	0	0	0	0	0	0	0	0	0	0	0	0	0	0	0	0	0	1	0	0	0	0
A0A340YEW7	UP000265300	Lipotes vexillifer	Chordata	Metazoa	0	0	0	0	0	0	0	0	0	0	0	0	0	0	0	0	0	0	0	0	0	0	0	0	0	0	0	0	0	0	0	0	0	0	0	0	0	0	0	0	0	0	0	0	0
A0A9W3GW50	UP000694950	Camelus bactrianus	Chordata	Metazoa	0	0	0	0	0	0	0	0	0	0	0	0	0	0	0	0	0	0	0	0	0	0	0	0	0	0	0	0	0	0	0	0	0	0	0	0	0	0	0	0	1	0	0	0	0
A0A8B7J7B2	UP000694841	Apteryx mantelli	Chordata	Metazoa	0	0	0	0	0	0	0	0	0	0	0	0	0	0	0	0	0	0	0	0	0	0	0	0	0	0	0	0	0	0	0	0	0	0	0	0	0	0	0	0	2	0	0	0	0
A0A9W3GFT7	UP000694950	Camelus bactrianus	Chordata	Metazoa	0	0	0	0	0	0	0	0	0	0	0	0	0	0	0	0	0	0	0	0	0	0	0	0	0	0	0	0	0	0	0	0	0	0	0	0	0	0	0	0	1	0	0	0	0
A0A340XTP6	UP000265300	Lipotes vexillifer	Chordata	Metazoa	0	0	0	0	0	0	0	0	0	0	0	0	0	0	0	0	0	0	0	0	0	0	0	0	0	0	0	0	0	0	0	0	0	0	0	0	0	0	0	0	1	0	0	0	0
A0A8B8D231	UP000694844	Crassostrea virginica	Mollusca	Metazoa	0	0	0	0	0	0	0	0	0	0	0	0	0	0	0	0	0	0	0	0	0	0	0	0	0	0	0	0	0	0	0	0	0	0	0	0	0	0	0	0	1	0	0	0	0
A0A2Y9IDP8	UP000248481	Neomonachus schauinslandi	Chordata	Metazoa	0	0	0	0	0	0	0	0	0	0	0	0	0	0	0	0	0	0	0	0	0	0	0	0	0	0	0	0	0	0	0	0	0	0	0	0	0	0	0	0	0	0	0	0	0
A0A6J0CIJ6	UP000504601	Peromyscus maniculatus	Chordata	Metazoa	0	0	0	0	0	0	0	0	0	0	0	0	0	0	0	0	0	0	0	0	0	0	0	0	0	0	0	0	0	0	0	0	0	0	0	0	0	0	0	0	1	0	0	0	0
A0A9C6SN54	UP000515160	Drosophila albomicans	Arthropoda	Metazoa	0	0	0	0	0	0	0	0	0	0	0	0	0	0	0	0	0	0	0	0	0	0	0	0	0	0	0	0	0	0	0	0	0	0	0	0	0	0	0	0	1	0	0	0	0
A0A8S1EHJ9	UP000494206	Caenorhabditis bovis	Nematoda	Metazoa	0	0	0	0	0	0	0	0	0	0	0	0	0	0	0	0	0	0	0	0	0	0	0	0	0	0	0	0	0	0	0	0	0	0	0	0	0	0	0	0	1	0	0	0	0
A0A9Q0X7I5	UP001142489	Phrynocephalus forsythii	Chordata	Metazoa	0	0	0	0	0	0	0	0	0	0	0	0	0	0	0	0	0	0	0	0	0	0	0	0	0	0	0	0	0	0	0	0	0	0	0	0	0	0	0	0	0	0	0	0	0
A0A5E4C5G2	UP000335636	Marmota monax	Chordata	Metazoa	0	0	0	0	0	0	0	0	0	0	0	0	0	0	0	0	0	0	0	0	0	0	0	0	0	0	0	0	0	0	0	0	0	0	0	0	0	0	0	0	0	0	0	0	0
A0A8C1ET80	UP001108240	Cyprinus carpio	Chordata	Metazoa	0	0	0	0	0	0	0	0	0	0	0	0	0	0	0	0	0	0	0	0	0	0	0	0	0	0	0	0	0	0	0	0	0	0	0	0	0	0	0	0	0	0	0	0	0
A0A1D2NIW2	UP000094527	Orchesella cincta	Arthropoda	Metazoa	0	0	0	0	0	0	0	0	0	0	0	0	0	0	0	0	0	0	0	0	0	0	0	0	0	0	0	0	0	0	0	0	0	0	0	0	0	0	0	0	1	0	0	0	0
A0A0N1IAN2	UP000053240	Papilio machaon	Arthropoda	Metazoa	0	0	0	0	0	0	0	0	0	0	0	0	0	0	0	0	0	0	0	0	0	0	0	0	0	0	0	0	0	0	0	0	0	0	0	0	0	0	0	0	0	0	0	0	0
Q21691	UP000001940	Caenorhabditis elegans	Nematoda	Metazoa	0	0	0	0	0	0	0	0	0	0	0	0	0	0	0	0	0	0	0	0	0	0	0	0	0	0	0	0	0	0	0	0	0	0	0	0	0	0	0	0	1	0	0	0	0
A0A8J1TJK0	UP000749559	Owenia fusiformis	Annelida	Metazoa	0	0	0	0	0	0	0	0	0	0	0	0	0	0	0	0	0	0	0	0	0	0	0	0	0	0	0	0	0	0	0	0	0	0	0	0	0	0	0	0	0	0	0	0	0
A0A8J1XZI4	UP000749559	Owenia fusiformis	Annelida	Metazoa	0	0	0	0	0	0	0	0	0	0	0	0	0	0	0	0	0	0	0	0	0	0	0	0	0	0	0	0	0	0	0	0	0	0	0	0	0	0	0	0	0	0	0	0	0
A0A8J1UUN2	UP000749559	Owenia fusiformis	Annelida	Metazoa	0	0	0	0	0	0	0	0	0	0	0	0	0	0	0	0	0	0	0	0	0	0	0	0	0	0	0	0	0	0	0	0	0	0	0	0	0	0	0	0	0	0	0	0	0
A0A7I4KHG5	UP000006672	Brugia malayi	Nematoda	Metazoa	0	0	0	0	0	0	0	0	0	0	0	0	0	0	0	0	0	0	0	0	0	0	0	0	0	0	0	0	0	0	0	0	0	0	0	0	0	0	0	0	1	0	0	0	0
W2SLI3	UP000053676	Necator americanus	Nematoda	Metazoa	0	0	0	0	0	0	0	0	0	0	0	0	0	0	0	0	0	0	0	0	0	0	0	0	0	0	0	0	0	0	0	0	0	0	0	0	0	0	0	0	1	0	0	0	0
W2SKG2	UP000053676	Necator americanus	Nematoda	Metazoa	0	0	0	0	0	0	0	0	0	0	0	0	0	0	0	0	0	0	0	0	0	0	0	0	0	0	0	0	0	0	0	0	0	0	0	0	0	0	0	0	1	0	0	0	0
Q9TXN7	UP000001940	Caenorhabditis elegans	Nematoda	Metazoa	0	0	0	0	0	0	0	0	0	0	0	0	0	0	0	0	0	0	0	0	0	0	0	0	0	0	0	0	0	0	0	0	0	0	0	0	0	0	0	0	1	0	0	0	0
A0A915B6F2	UP000887569	Parascaris univalens	Nematoda	Metazoa	0	0	0	0	0	0	0	0	0	0	0	0	0	0	0	0	0	0	0	0	0	0	0	0	0	0	0	0	0	0	0	0	0	0	0	0	0	0	0	0	1	0	0	0	0
A0AA39HYP9	UP001175271	Steinernema hermaphroditum	Nematoda	Metazoa	0	0	0	0	0	0	0	0	0	0	0	0	0	0	0	0	0	0	0	0	0	0	0	0	0	0	0	0	0	0	0	0	0	0	0	0	0	0	0	0	1	0	0	0	0
A0A2A2JHX0	UP000218231	Diploscapter pachys	Nematoda	Metazoa	0	0	0	0	0	0	0	0	0	0	0	0	0	0	0	0	0	0	0	0	0	0	0	0	0	0	0	0	0	0	0	0	0	0	0	0	0	0	0	0	1	0	0	0	0
G0PDS6	UP000008068	Caenorhabditis brenneri	Nematoda	Metazoa	0	0	0	0	0	0	0	0	0	0	0	0	0	0	0	0	0	0	0	0	0	0	0	0	0	0	0	0	0	0	0	0	0	0	0	0	0	0	0	0	1	0	0	0	0
G0P2U7	UP000008068	Caenorhabditis brenneri	Nematoda	Metazoa	0	0	0	0	0	0	0	0	0	0	0	0	0	0	0	0	0	0	0	0	0	0	0	0	0	0	0	0	0	0	0	0	0	0	0	0	0	0	0	0	1	0	0	0	0
G0P0F4	UP000008068	Caenorhabditis brenneri	Nematoda	Metazoa	0	0	0	0	0	0	0	0	0	0	0	0	0	0	0	0	0	0	0	0	0	0	0	0	0	0	0	0	0	0	0	0	0	0	0	0	0	0	0	0	1	0	0	0	0
G0PF48	UP000008068	Caenorhabditis brenneri	Nematoda	Metazoa	0	0	0	0	0	0	0	0	0	0	0	0	0	0	0	0	0	0	0	0	0	0	0	0	0	0	0	0	0	0	0	0	0	0	0	0	0	0	0	0	1	0	0	0	0
T1FHP2	UP000015101	Helobdella robusta	Annelida	Metazoa	0	0	0	0	0	0	0	0	0	0	0	0	0	0	0	0	0	0	0	0	0	0	0	0	0	0	0	0	0	0	0	0	0	0	0	0	0	0	0	0	1	0	0	0	0
A0A7R9QLU9	UP000728032	Oppiella nova	Arthropoda	Metazoa	0	0	0	0	0	0	0	0	0	0	0	0	0	0	0	0	0	0	0	0	0	0	0	0	0	0	0	0	0	0	0	0	0	0	0	0	0	0	0	0	1	0	0	0	0
G0PIA5	UP000008068	Caenorhabditis brenneri	Nematoda	Metazoa	0	0	0	0	0	0	0	0	0	0	0	0	0	0	0	0	0	0	0	0	0	0	0	0	0	0	0	0	0	0	0	0	0	0	0	0	0	0	0	0	1	0	0	0	0
A0A9P0JP20	UP001152888	Acanthoscelides obtectus	Arthropoda	Metazoa	0	0	0	0	0	0	0	0	0	0	0	0	0	0	0	0	0	0	0	0	0	0	0	0	0	0	0	0	0	0	0	0	0	0	0	0	0	0	0	0	1	0	0	0	0
A0AAF3FQ77	UP000887575	Mesorhabditis belari	Nematoda	Metazoa	0	0	0	0	0	0	0	0	0	0	0	0	0	0	0	0	0	0	0	0	0	0	0	0	0	0	0	0	0	0	0	0	0	0	0	0	0	0	0	0	1	0	0	0	0
A0A0P7TG43	UP000034805	Scleropages formosus	Chordata	Metazoa	0	0	0	0	0	0	0	0	0	0	0	0	0	0	0	0	0	0	0	0	0	0	0	0	0	0	0	0	0	0	0	0	0	0	0	0	0	0	0	0	1	0	0	0	0
A0A2A6BMF0	UP000005239	Pristionchus pacificus	Nematoda	Metazoa	0	0	0	0	0	0	0	0	0	0	0	0	0	0	0	0	0	0	0	0	0	0	0	0	0	0	0	0	0	0	0	0	0	0	0	0	0	0	0	0	0	0	0	0	0
B3MJZ4	UP000007801	Drosophila ananassae	Arthropoda	Metazoa	0	0	0	0	0	0	0	0	0	0	0	0	0	0	0	0	0	0	0	0	0	0	0	0	0	0	0	0	0	0	0	0	0	0	0	0	0	0	0	0	1	0	0	0	0
A0A813NP72	UP000663829	Didymodactylos carnosus	Rotifera	Metazoa	0	0	0	0	0	0	0	0	0	0	0	0	0	0	0	0	0	0	0	0	0	0	0	0	0	0	0	0	0	0	0	0	0	0	0	0	0	0	0	0	1	0	0	0	0
B4MU97	UP000007798	Drosophila willistoni	Arthropoda	Metazoa	0	0	0	0	0	0	0	0	0	0	0	0	0	0	0	0	0	0	0	0	0	0	0	0	0	0	0	0	0	0	0	0	0	0	0	0	0	0	0	0	1	0	0	0	0
A0A813R424	UP000663829	Didymodactylos carnosus	Rotifera	Metazoa	0	0	0	0	0	0	0	0	0	0	0	0	0	0	0	0	0	0	0	0	0	0	0	0	0	0	0	0	0	0	0	0	0	0	0	0	0	0	0	0	1	0	0	0	0
A0A7M5X2G7	UP000594262	Clytia hemisphaerica	Cnidaria	Metazoa	0	0	0	0	0	0	0	0	0	0	0	0	0	0	0	0	0	0	0	0	0	0	0	0	0	0	0	0	0	0	0	0	0	0	0	0	0	0	0	0	1	0	0	0	0
B4LV36	UP000008792	Drosophila virilis	Arthropoda	Metazoa	0	0	0	0	0	0	0	0	0	0	0	0	0	0	0	0	0	0	0	0	0	0	0	0	0	0	0	0	0	0	0	0	0	0	0	0	0	0	0	0	1	0	0	0	0
A0A0M3QTP9	UP000494163	Drosophila busckii	Arthropoda	Metazoa	0	0	0	0	0	0	0	0	0	0	0	0	0	0	0	0	0	0	0	0	0	0	0	0	0	0	0	0	0	0	0	0	0	0	0	0	0	0	0	0	1	0	0	0	0
A0A814USU3	UP000663829	Didymodactylos carnosus	Rotifera	Metazoa	0	0	0	0	0	0	0	0	0	0	0	0	0	0	0	0	0	0	0	0	0	0	0	0	0	0	0	0	0	0	0	0	0	0	0	0	0	0	0	0	1	0	0	0	0
A0A7R8UE33	UP000594454	Hermetia illucens	Arthropoda	Metazoa	0	0	0	0	0	0	0	0	0	0	0	0	0	0	0	0	0	0	0	0	0	0	0	0	0	0	0	0	0	0	0	0	0	0	0	0	0	0	0	0	1	0	0	0	0
A0A9N9SPQ7	UP001153709	Diabrotica balteata	Arthropoda	Metazoa	0	0	0	0	0	0	0	0	0	0	0	0	0	0	0	0	0	0	0	0	0	0	0	0	0	0	0	0	0	0	0	0	0	0	0	0	0	0	0	0	1	0	0	0	0
A0A9P0D8T4	UP001153636	Psylliodes chrysocephala	Arthropoda	Metazoa	0	0	0	0	0	0	0	0	0	0	0	0	0	0	0	0	0	0	0	0	0	0	0	0	0	0	0	0	0	0	0	0	0	0	0	0	0	0	0	0	1	0	0	0	0
A0A7R8UE47	UP000594454	Hermetia illucens	Arthropoda	Metazoa	0	0	0	0	0	0	0	0	0	0	0	0	0	0	0	0	0	0	0	0	0	0	0	0	0	0	0	0	0	0	0	0	0	0	0	0	0	0	0	0	1	0	0	0	0
A0A8J2L609	UP000708208	Allacma fusca	Arthropoda	Metazoa	0	0	0	0	0	0	0	0	0	0	0	0	0	0	0	0	0	0	0	0	0	0	0	0	0	0	0	0	0	0	0	0	0	0	0	0	0	0	0	0	1	0	0	0	0
A0A8S4A2L7	UP000678393	Candidula unifasciata	Mollusca	Metazoa	0	0	0	0	0	0	0	0	0	0	0	0	0	0	0	0	0	0	0	0	0	0	0	0	0	0	0	0	0	0	0	0	0	0	0	0	0	0	0	0	1	0	0	0	0
A0A8I6TH98	UP000494040	Cimex lectularius	Arthropoda	Metazoa	0	0	0	0	0	0	0	0	0	0	0	0	0	0	0	0	0	0	0	0	0	0	0	0	0	0	0	0	0	0	0	0	0	0	0	0	0	0	0	0	1	0	0	0	0
A0A9P0GUY2	UP001153712	Phyllotreta striolata	Arthropoda	Metazoa	0	0	0	0	0	0	0	0	0	0	0	0	0	0	0	0	0	0	0	0	0	0	0	0	0	0	0	0	0	0	0	0	0	0	0	0	0	0	0	0	1	0	0	0	0
A0A9N9WNP3	UP001153620	Chironomus riparius	Arthropoda	Metazoa	0	0	0	0	0	0	0	0	0	0	0	0	0	0	0	0	0	0	0	0	0	0	0	0	0	0	0	0	0	0	0	0	0	0	0	0	0	0	0	0	1	0	0	0	0
A0A9P0Q0J1	UP001152888	Acanthoscelides obtectus	Arthropoda	Metazoa	0	0	0	0	0	0	0	0	0	0	0	0	0	0	0	0	0	0	0	0	0	0	0	0	0	0	0	0	0	0	0	0	0	0	0	0	0	0	0	0	1	0	0	0	0
B4KHB7	UP000009192	Drosophila mojavensis	Arthropoda	Metazoa	0	0	0	0	0	0	0	0	0	0	0	0	0	0	0	0	0	0	0	0	0	0	0	0	0	0	0	0	0	0	0	0	0	0	0	0	0	0	0	0	1	0	0	0	0
D6WSL8	UP000007266	Tribolium castaneum	Arthropoda	Metazoa	0	0	0	0	0	0	0	0	0	0	0	0	0	0	0	0	0	0	0	0	0	0	0	0	0	0	0	0	0	0	0	0	0	0	0	0	0	0	0	0	1	0	0	0	0
A0A813PXG7	UP000663829	Didymodactylos carnosus	Rotifera	Metazoa	0	0	0	0	0	0	0	0	0	0	0	0	0	0	0	0	0	0	0	0	0	0	0	0	0	0	0	0	0	0	0	0	0	0	0	0	0	0	0	0	1	0	0	0	0
A0A921ZCW3	UP000791440	Manduca sexta	Arthropoda	Metazoa	0	0	0	0	0	0	0	0	0	0	0	0	0	0	0	0	0	0	0	0	0	0	0	0	0	0	0	0	0	0	0	0	0	0	0	0	0	0	0	0	1	0	0	0	0
A0A8I6RZT6	UP000494040	Cimex lectularius	Arthropoda	Metazoa	0	0	0	0	0	0	0	0	0	0	0	0	0	0	0	0	0	0	0	0	0	0	0	0	0	0	0	0	0	0	0	0	0	0	0	0	0	0	0	0	1	0	0	0	0
A0A8I6S6R7	UP000494040	Cimex lectularius	Arthropoda	Metazoa	0	0	0	0	0	0	0	0	0	0	0	0	0	0	0	0	0	0	0	0	0	0	0	0	0	0	0	0	0	0	0	0	0	0	0	0	0	0	0	0	1	0	0	0	0
A0AA38I760	UP001168821	Zophobas morio	Arthropoda	Metazoa	0	0	0	0	0	0	0	0	0	0	0	0	0	0	0	0	0	0	0	0	0	0	0	0	0	0	0	0	0	0	0	0	0	0	0	0	0	0	0	0	1	0	0	0	0
A0A834MUR8	UP000617340	Vespula germanica	Arthropoda	Metazoa	0	0	0	0	0	0	0	0	0	0	0	0	0	0	0	0	0	0	0	0	0	0	0	0	0	0	0	0	0	0	0	0	0	0	0	0	0	0	0	0	1	0	0	0	0
A0A8K0C682	UP000801492	Ignelater luminosus	Arthropoda	Metazoa	0	0	0	0	0	0	0	0	0	0	0	0	0	0	0	0	0	0	0	0	0	0	0	0	0	0	0	0	0	0	0	0	0	0	0	0	0	0	0	0	1	0	0	0	0
A0A7R9ABY6	UP000677054	Darwinula stevensoni	Arthropoda	Metazoa	0	0	0	0	0	0	0	0	0	0	0	0	0	0	0	0	0	0	0	0	0	0	0	0	0	0	0	0	0	0	0	0	0	0	0	0	0	0	0	0	1	0	0	0	0
A0A833W0K8	UP000655588	Frieseomelitta varia	Arthropoda	Metazoa	0	0	0	0	0	0	0	0	0	0	0	0	0	0	0	0	0	0	0	0	0	0	0	0	0	0	0	0	0	0	0	0	0	0	0	0	0	0	0	0	1	0	0	0	0
B0W5P0	UP000002320	Culex quinquefasciatus	Arthropoda	Metazoa	0	0	0	0	0	0	0	0	0	0	0	0	0	0	0	0	0	0	0	0	0	0	0	0	0	0	0	0	0	0	0	0	0	0	0	0	0	0	0	0	1	0	0	0	0
A0AA40KL16	UP001177670	Melipona bicolor	Arthropoda	Metazoa	0	0	0	0	0	0	0	0	0	0	0	0	0	0	0	0	0	0	0	0	0	0	0	0	0	0	0	0	0	0	0	0	0	0	0	0	0	0	0	0	1	0	0	0	0
A0A482XDW1	UP000291343	Laodelphax striatellus	Arthropoda	Metazoa	0	0	0	0	0	0	0	0	0	0	0	0	0	0	0	0	0	0	0	0	0	0	0	0	0	0	0	0	0	0	0	0	0	0	0	0	0	0	0	0	1	0	0	0	0
A0A9N9QLR3	UP001152799	Ceutorhynchus assimilis	Arthropoda	Metazoa	0	0	0	0	0	0	0	0	0	0	0	0	0	0	0	0	0	0	0	0	0	0	0	0	0	0	0	0	0	0	0	0	0	0	0	0	0	0	0	0	1	0	0	0	0
A0A9N9MIZ5	UP001152799	Ceutorhynchus assimilis	Arthropoda	Metazoa	0	0	0	0	0	0	0	0	0	0	0	0	0	0	0	0	0	0	0	0	0	0	0	0	0	0	0	0	0	0	0	0	0	0	0	0	0	0	0	0	1	0	0	0	0
B0XE74	UP000002320	Culex quinquefasciatus	Arthropoda	Metazoa	0	0	0	0	0	0	0	0	0	0	0	0	0	0	0	0	0	0	0	0	0	0	0	0	0	0	0	0	0	0	0	0	0	0	0	0	0	0	0	0	1	0	0	0	0
W5JHH8	UP000000673	Anopheles darlingi	Arthropoda	Metazoa	0	0	0	0	0	0	0	0	0	0	0	0	0	0	0	0	0	0	0	0	0	0	0	0	0	0	0	0	0	0	0	0	0	0	0	0	0	0	0	0	1	0	0	0	0
A0A8J2L7V4	UP000708208	Allacma fusca	Arthropoda	Metazoa	0	0	0	0	0	0	0	0	0	0	0	0	0	0	0	0	0	0	0	0	0	0	0	0	0	0	0	0	0	0	0	0	0	0	0	0	0	0	0	0	1	0	0	0	0
A0A922CJ80	UP000791440	Manduca sexta	Arthropoda	Metazoa	0	0	0	0	0	0	0	0	0	0	0	0	0	0	0	0	0	0	0	0	0	0	0	0	0	0	0	0	0	0	0	0	0	0	0	0	0	0	0	0	1	0	0	0	0
A0A182YEB7	UP000076408	Anopheles stephensi	Arthropoda	Metazoa	0	0	0	0	0	0	0	0	0	0	0	0	0	0	0	0	0	0	0	0	0	0	0	0	0	0	0	0	0	0	0	0	0	0	0	0	0	0	0	0	1	0	0	0	0
B0WYL9	UP000002320	Culex quinquefasciatus	Arthropoda	Metazoa	0	0	0	0	0	0	0	0	0	0	0	0	0	0	0	0	0	0	0	0	0	0	0	0	0	0	0	0	0	0	0	0	0	0	0	0	0	0	0	0	1	0	0	0	0
A0A7R9KHL5	UP000759131	Medioppia subpectinata	Arthropoda	Metazoa	0	0	0	0	0	0	0	0	0	0	0	0	0	0	0	0	0	0	0	0	0	0	0	0	0	0	0	0	0	0	0	0	0	0	0	0	0	0	0	0	1	0	0	0	0
B0XE75	UP000002320	Culex quinquefasciatus	Arthropoda	Metazoa	0	0	0	0	0	0	0	0	0	0	0	0	0	0	0	0	0	0	0	0	0	0	0	0	0	0	0	0	0	0	0	0	0	0	0	0	0	0	0	0	1	0	0	0	0
A0A8S0YUI1	UP000494106	Arctia plantaginis	Arthropoda	Metazoa	0	0	0	0	0	0	0	0	0	0	0	0	0	0	0	0	0	0	0	0	0	0	0	0	0	0	0	0	0	0	0	0	0	0	0	0	0	0	0	0	1	0	0	0	0
A0A8S4Q4N7	UP000749559	Owenia fusiformis	Annelida	Metazoa	0	0	0	0	0	0	0	0	0	0	0	0	0	0	0	0	0	0	0	0	0	0	0	0	0	0	0	0	0	0	0	0	0	0	0	0	0	0	0	0	1	0	0	0	0
A0AAF3EXZ2	UP000887575	Mesorhabditis belari	Nematoda	Metazoa	0	0	0	0	0	0	0	0	0	0	0	0	0	0	0	0	0	0	0	0	0	0	0	0	0	0	0	0	0	0	0	0	0	0	0	0	0	0	0	0	1	0	0	0	0
A0AA88KXN6	UP001187531	Artemia franciscana	Arthropoda	Metazoa	0	0	0	0	0	0	0	0	0	0	0	0	0	0	0	0	0	0	0	0	0	0	0	0	0	0	0	0	0	0	0	0	0	0	0	0	0	0	0	0	1	0	0	0	0
A0A834MVW2	UP000614350	Vespula vulgaris	Arthropoda	Metazoa	0	0	0	0	0	0	0	0	0	0	0	0	0	0	0	0	0	0	0	0	0	0	0	0	0	0	0	0	0	0	0	0	0	0	0	0	0	0	0	0	1	0	0	0	0
A0A903VE23	UP000008820	Aedes aegypti	Arthropoda	Metazoa	0	0	0	0	0	0	0	0	0	0	0	0	0	0	0	0	0	0	0	0	0	0	0	0	0	0	0	0	0	0	0	0	0	0	0	0	0	0	0	0	1	0	0	0	0
A0AA88KY92	UP001187531	Artemia franciscana	Arthropoda	Metazoa	0	0	0	0	0	0	0	0	0	0	0	0	0	0	0	0	0	0	0	0	0	0	0	0	0	0	0	0	0	0	0	0	0	0	0	0	0	0	0	0	1	0	0	0	0
B0WE95	UP000002320	Culex quinquefasciatus	Arthropoda	Metazoa	0	0	0	0	0	0	0	0	0	0	0	0	0	0	0	0	0	0	0	0	0	0	0	0	0	0	0	0	0	0	0	0	0	0	0	0	0	0	0	0	0	0	0	0	0
A0A8J9Y5K1	UP000838878	Brenthis ino	Arthropoda	Metazoa	0	0	0	0	0	0	0	0	0	0	0	0	0	0	0	0	0	0	0	0	0	0	0	0	0	0	0	0	0	0	0	0	0	0	0	0	0	0	0	0	1	0	0	0	0
A0A7D9DN26	UP001152795	Paramuricea clavata	Cnidaria	Metazoa	0	0	0	0	0	0	0	0	0	0	0	0	0	0	0	0	0	0	0	0	0	0	0	0	0	0	0	0	0	0	0	0	0	0	0	0	0	0	0	0	0	0	0	0	0
A0A6S7FGF0	UP001152795	Paramuricea clavata	Cnidaria	Metazoa	0	0	0	0	0	0	0	0	0	0	0	0	0	0	0	0	0	0	0	0	0	0	0	0	0	0	0	0	0	0	0	0	0	0	0	0	0	0	0	0	1	0	0	0	0
A0A3M7R2I9	UP000276133	Brachionus plicatilis	Rotifera	Metazoa	0	0	0	0	0	0	0	0	0	0	0	0	0	0	0	0	0	0	0	0	0	0	0	0	0	0	0	0	0	0	0	0	0	0	0	0	0	0	0	0	1	0	0	0	0
A0A3M7S6P1	UP000276133	Brachionus plicatilis	Rotifera	Metazoa	0	0	0	0	0	0	0	0	0	0	0	0	0	0	0	0	0	0	0	0	0	0	0	0	0	0	0	0	0	0	0	0	0	0	0	0	0	0	0	0	0	0	0	0	0
A0AA35LK26	UP001178461	Podarcis lilfordi	Chordata	Metazoa	0	0	0	0	0	0	0	0	0	0	0	0	0	0	0	0	0	0	0	0	0	0	0	0	0	0	0	0	0	0	0	0	0	0	0	0	0	0	0	0	1	0	0	0	0
A0A3M7SCP9	UP000276133	Brachionus plicatilis	Rotifera	Metazoa	0	0	0	0	0	0	0	0	0	0	0	0	0	0	0	0	0	0	0	0	0	0	0	0	0	0	0	0	0	0	0	0	0	0	0	0	0	0	0	0	1	0	0	0	0
A0A164YUA8	UP000076858	Daphnia magna	Arthropoda	Metazoa	0	0	0	0	0	0	0	0	0	0	0	0	0	0	0	0	0	0	0	0	0	0	0	0	0	0	0	0	0	0	0	0	0	0	0	0	0	0	0	0	1	0	0	0	0
W2T741	UP000053676	Necator americanus	Nematoda	Metazoa	0	0	0	0	0	0	0	0	0	0	0	0	0	0	0	0	0	0	0	0	0	0	0	0	0	0	0	0	0	0	0	0	0	0	0	0	0	0	0	0	1	0	0	0	0
A0A016WPN3	UP000024635	Ancylostoma ceylanicum	Nematoda	Metazoa	0	0	0	0	0	0	0	0	0	0	0	0	0	0	0	0	0	0	0	0	0	0	0	0	0	0	0	0	0	0	0	0	0	0	0	0	0	0	0	0	1	0	0	0	0
A0A016U153	UP000024635	Ancylostoma ceylanicum	Nematoda	Metazoa	0	0	0	0	0	0	0	0	0	0	0	0	0	0	0	0	0	0	0	0	0	0	0	0	0	0	0	0	0	0	0	0	0	0	0	0	0	0	0	0	1	0	0	0	0
W2TQ03	UP000053676	Necator americanus	Nematoda	Metazoa	0	0	0	0	0	0	0	0	0	0	0	0	0	0	0	0	0	0	0	0	0	0	0	0	0	0	0	0	0	0	0	0	0	0	0	0	0	0	0	0	0	0	0	0	0
W2SQF9	UP000053676	Necator americanus	Nematoda	Metazoa	0	0	0	0	0	0	0	0	0	0	0	0	0	0	0	0	0	0	0	0	0	0	0	0	0	0	0	0	0	0	0	0	0	0	0	0	0	0	0	0	0	0	0	0	0
A0AAF3EUV6	UP000887575	Mesorhabditis belari	Nematoda	Metazoa	0	0	0	0	0	0	0	0	0	0	0	0	0	0	0	0	0	0	0	0	0	0	0	0	0	0	0	0	0	0	0	0	0	0	0	0	0	0	0	0	1	0	0	0	0
A0A016STV0	UP000024635	Ancylostoma ceylanicum	Nematoda	Metazoa	0	0	0	0	0	0	0	0	0	0	0	0	0	0	0	0	0	0	0	0	0	0	0	0	0	0	0	0	0	0	0	0	0	0	0	0	0	0	0	0	1	0	0	0	0
W2TR58	UP000053676	Necator americanus	Nematoda	Metazoa	0	0	0	0	0	0	0	0	0	0	0	0	0	0	0	0	0	0	0	0	0	0	0	0	0	0	0	0	0	0	0	0	0	0	0	0	0	0	0	0	0	0	0	0	0
W2SNP1	UP000053676	Necator americanus	Nematoda	Metazoa	0	0	0	0	0	0	0	0	0	0	0	0	0	0	0	0	0	0	0	0	0	0	0	0	0	0	0	0	0	0	0	0	0	0	0	0	0	0	0	0	0	0	0	0	0
A0A6A5EFZ9	UP000465112	Perca fluviatilis	Chordata	Metazoa	0	0	0	0	0	0	0	0	0	0	0	0	0	0	0	0	0	0	0	0	0	0	0	0	0	0	0	0	0	0	0	0	0	0	0	0	0	0	0	0	0	0	0	0	0
A0A8I6SGS6	UP000494040	Cimex lectularius	Arthropoda	Metazoa	0	0	0	0	0	0	0	0	0	0	0	0	0	0	0	0	0	0	0	0	0	0	0	0	0	0	0	0	0	0	0	0	0	0	0	0	0	0	0	0	0	0	0	0	0
A0A0P7UES6	UP000034805	Scleropages formosus	Chordata	Metazoa	0	0	0	0	0	0	0	0	0	0	0	0	0	0	0	0	0	0	0	0	0	0	0	0	0	0	0	0	0	0	0	0	0	0	0	0	0	0	0	0	0	0	0	0	0
A0A8T2KA03	UP000812440	Hymenochirus boettgeri	Chordata	Metazoa	0	0	0	0	0	0	0	0	0	0	0	0	0	0	0	0	0	0	0	0	0	0	0	0	0	0	0	0	0	0	0	0	0	0	0	0	0	0	0	0	0	0	0	0	0
A0A2G5UGY5	UP000230233	Caenorhabditis nigoni	Nematoda	Metazoa	0	0	0	0	0	0	0	0	0	0	0	0	0	0	0	0	0	0	0	0	0	0	0	0	0	0	0	0	0	0	0	0	0	0	0	0	0	0	0	0	1	0	0	0	0
A0A0P7UFH7	UP000034805	Scleropages formosus	Chordata	Metazoa	0	0	0	0	0	0	0	0	0	0	0	0	0	0	0	0	0	0	0	0	0	0	0	0	0	0	0	0	0	0	0	0	0	0	0	0	0	0	0	0	0	0	0	0	0
A0A267GAJ2	UP000215902	Macrostomum lignano	Platyhelminthes	Metazoa	0	0	0	0	0	0	0	0	0	0	0	0	0	0	0	0	0	0	0	0	0	0	0	0	0	0	0	0	0	0	0	0	0	0	0	0	0	0	0	0	1	0	0	0	0
A0A016UAR0	UP000024635	Ancylostoma ceylanicum	Nematoda	Metazoa	0	0	0	0	0	0	0	0	0	0	0	0	0	0	0	0	0	0	0	0	0	0	0	0	0	0	0	0	0	0	0	0	0	0	0	0	0	0	0	0	0	0	0	0	0
A0A9N7TKM6	UP001153269	Pleuronectes platessa	Chordata	Metazoa	0	0	0	0	0	0	0	0	0	0	0	0	0	0	0	0	0	0	0	0	0	0	0	0	0	0	0	0	0	0	0	0	0	0	0	0	0	0	0	0	0	0	0	0	0
A0A3P6SGL4	UP000277928	Litomosoides sigmodontis	Nematoda	Metazoa	0	0	0	0	0	0	0	0	0	0	0	0	0	0	0	0	0	0	0	0	0	0	0	0	0	0	0	0	0	0	0	0	0	0	0	0	0	0	0	0	1	0	0	0	0
A0A8C3BMV3	UP000694556	Cairina moschata	Chordata	Metazoa	0	0	0	0	0	0	0	0	0	0	0	0	0	0	0	0	0	0	0	0	0	0	0	0	0	0	0	0	0	0	0	0	0	0	0	0	0	0	0	0	0	0	0	0	0
A0A2A2KKI2	UP000218231	Diploscapter pachys	Nematoda	Metazoa	0	0	0	0	0	0	0	0	0	0	0	0	0	0	0	0	0	0	0	0	0	0	0	0	0	0	0	0	0	0	0	0	0	0	0	0	0	0	0	0	1	0	0	0	0
A0A8C6Z5C6	UP000694420	Nothoprocta perdicaria	Chordata	Metazoa	0	0	0	0	0	0	0	0	0	0	0	0	0	0	0	0	0	0	0	0	0	0	0	0	0	0	0	0	0	0	0	0	0	0	0	0	0	0	0	0	0	0	0	0	0
A0A9Q1E0E4	UP001152803	Conger conger	Chordata	Metazoa	0	0	0	0	0	0	0	0	0	0	0	0	0	0	0	0	0	0	0	0	0	0	0	0	0	0	0	0	0	0	0	0	0	0	0	0	0	0	0	0	0	0	0	0	0
A0A8C9QJQ0	UP000694422	Spermophilus dauricus	Chordata	Metazoa	0	0	0	0	0	0	0	0	0	0	0	0	0	0	0	0	0	0	0	0	0	0	0	0	0	0	0	0	0	0	0	0	0	0	0	0	0	0	0	0	0	0	0	0	0
A0A9Q1EWY4	UP001152622	Synaphobranchus kaupii	Chordata	Metazoa	0	0	0	0	0	0	0	0	0	0	0	0	0	0	0	0	0	0	0	0	0	0	0	0	0	0	0	0	0	0	0	0	0	0	0	0	0	0	0	0	0	0	0	0	0
A0A2J7PU94	UP000235965	Cryptotermes secundus	Arthropoda	Metazoa	0	0	0	0	0	0	0	0	0	0	0	0	0	0	0	0	0	0	0	0	0	0	0	0	0	0	0	0	0	0	0	0	0	0	0	0	0	0	0	0	0	0	0	0	0
A0A8C8Y4P5	UP000694399	Panthera leo	Chordata	Metazoa	0	0	0	0	0	0	0	0	0	0	0	0	0	0	0	0	0	0	0	0	0	0	0	0	0	0	0	0	0	0	0	0	0	0	0	0	0	0	0	0	0	0	0	0	0
A0AA40FMW3	UP001177670	Melipona bicolor	Arthropoda	Metazoa	0	0	0	0	0	0	0	0	0	0	0	0	0	0	0	0	0	0	0	0	0	0	0	0	0	0	0	0	0	0	0	0	0	0	0	0	0	0	0	0	0	0	0	0	0
A0A9P0TEE4	UP001152562	Pieris brassicae	Arthropoda	Metazoa	0	0	0	0	0	0	0	0	0	0	0	0	0	0	0	0	0	0	0	0	0	0	0	0	0	0	0	0	0	0	0	0	0	0	0	0	0	0	0	0	1	0	0	0	0
A0A820XDM0	UP000663884	Rotaria sp. Silwood2	Rotifera	Metazoa	0	0	0	0	0	0	0	0	0	0	0	0	0	0	0	0	0	0	0	0	0	0	0	0	0	0	0	0	0	0	0	0	0	0	0	0	0	0	0	0	0	0	0	0	0
I3M8U5	UP000005215	Ictidomys tridecemlineatus	Chordata	Metazoa	0	0	0	0	0	0	0	0	0	0	0	0	0	0	0	0	0	0	0	0	0	0	0	0	0	0	0	0	0	0	0	0	0	0	0	0	0	0	0	0	0	0	0	0	0
A0A8C2UJ35	UP000694398	Chinchilla lanigera	Chordata	Metazoa	0	0	0	0	0	0	0	0	0	0	0	0	0	0	0	0	0	0	0	0	0	0	0	0	0	0	0	0	0	0	0	0	0	0	0	0	0	0	0	0	0	0	0	0	0
A0A6L2Q4E2	UP000502823	Coptotermes formosanus	Arthropoda	Metazoa	0	0	0	0	0	0	0	0	0	0	0	0	0	0	0	0	0	0	0	0	0	0	0	0	0	0	0	0	0	0	0	0	0	0	0	0	0	0	0	0	1	0	0	0	0
A0A158P1R9	UP000005205	Atta cephalotes	Arthropoda	Metazoa	0	0	0	0	0	0	0	0	0	0	0	0	0	0	0	0	0	0	0	0	0	0	0	0	0	0	0	0	0	0	0	0	0	0	0	0	0	0	0	0	1	0	0	0	0
A0A553NNY5	UP000318571	Tigriopus californicus	Arthropoda	Metazoa	0	0	0	0	0	0	0	0	0	0	0	0	0	0	0	0	0	0	0	0	0	0	0	0	0	0	0	0	0	0	0	0	0	0	0	0	0	0	0	0	1	0	0	0	0
A0A2A2JMY4	UP000218231	Diploscapter pachys	Nematoda	Metazoa	0	0	0	0	0	0	0	0	0	0	0	0	0	0	0	0	0	0	0	0	0	0	0	0	0	0	0	0	0	0	0	0	0	0	0	0	0	0	0	0	1	0	0	0	0
U4UG89	UP000030742	Dendroctonus ponderosae	Arthropoda	Metazoa	0	0	0	0	0	0	0	0	0	0	0	0	0	0	0	0	0	0	0	0	0	0	0	0	0	0	0	0	0	0	0	0	0	0	0	0	0	0	0	0	1	0	0	0	0
A0A5E4QRG8	UP000324832	Leptidea sinapis	Arthropoda	Metazoa	0	0	0	0	0	0	0	0	0	0	0	0	0	0	0	0	0	0	0	0	0	0	0	0	0	0	0	0	0	0	0	0	0	0	0	0	0	0	0	0	1	0	0	0	0
A0A158NV03	UP000005205	Atta cephalotes	Arthropoda	Metazoa	0	0	0	0	0	0	0	0	0	0	0	0	0	0	0	0	0	0	0	0	0	0	0	0	0	0	0	0	0	0	0	0	0	0	0	0	0	0	0	0	1	0	0	0	0
A0A3S0ZXN2	UP000271974	Elysia chlorotica	Mollusca	Metazoa	0	0	0	0	0	0	0	0	0	0	0	0	0	0	0	0	0	0	0	0	0	0	0	0	0	0	0	0	0	0	0	0	0	0	0	0	0	0	0	0	0	0	0	0	0
A0A8S9XJ22	UP000466442	Apolygus lucorum	Arthropoda	Metazoa	0	0	0	0	0	0	0	0	0	0	0	0	0	0	0	0	0	0	0	0	0	0	0	0	0	0	0	0	0	0	0	0	0	0	0	0	0	0	0	0	1	0	0	0	0
E3M956	UP000008281	Caenorhabditis remanei	Nematoda	Metazoa	0	0	0	0	0	0	0	0	0	0	0	0	0	0	0	0	0	0	0	0	0	0	0	0	0	0	0	0	0	0	0	0	0	0	0	0	0	0	0	0	1	0	0	0	0
A0A8S9WR43	UP000466442	Apolygus lucorum	Arthropoda	Metazoa	0	0	0	0	0	0	0	0	0	0	0	0	0	0	0	0	0	0	0	0	0	0	0	0	0	0	0	0	0	0	0	0	0	0	0	0	0	0	0	0	1	0	0	0	0
A0A8S1D807	UP000494165	Cloeon dipterum	Arthropoda	Metazoa	0	0	0	0	0	0	0	0	0	0	0	0	0	0	0	0	0	0	0	0	0	0	0	0	0	0	0	0	0	0	0	0	0	0	0	0	0	0	0	0	1	0	0	0	0
A0A8S1DVS2	UP000494165	Cloeon dipterum	Arthropoda	Metazoa	0	0	0	0	0	0	0	0	0	0	0	0	0	0	0	0	0	0	0	0	0	0	0	0	0	0	0	0	0	0	0	0	0	0	0	0	0	0	0	0	1	0	0	0	0
A0A915BBR6	UP000887569	Parascaris univalens	Nematoda	Metazoa	0	0	0	0	0	0	0	0	0	0	0	0	0	0	0	0	0	0	0	0	0	0	0	0	0	0	0	0	0	0	0	0	0	0	0	0	0	0	0	0	1	0	0	0	0
A0A9P0H373	UP001152798	Nezara viridula	Arthropoda	Metazoa	0	0	0	0	0	0	0	0	0	0	0	0	0	0	0	0	0	0	0	0	0	0	0	0	0	0	0	0	0	0	0	0	0	0	0	0	0	0	0	0	0	0	0	0	0
A0A7J6A3N8	UP000593565	Ameiurus melas	Chordata	Metazoa	0	0	0	0	0	0	0	0	0	0	0	0	0	0	0	0	0	0	0	0	0	0	0	0	0	0	0	0	0	0	0	0	0	0	0	0	0	0	0	0	0	0	0	0	0
A0A915BBS2	UP000887569	Parascaris univalens	Nematoda	Metazoa	0	0	0	0	0	0	0	0	0	0	0	0	0	0	0	0	0	0	0	0	0	0	0	0	0	0	0	0	0	0	0	0	0	0	0	0	0	0	0	0	1	0	0	0	0
A0A915BBR3	UP000887569	Parascaris univalens	Nematoda	Metazoa	0	0	0	0	0	0	0	0	0	0	0	0	0	0	0	0	0	0	0	0	0	0	0	0	0	0	0	0	0	0	0	0	0	0	0	0	0	0	0	0	1	0	0	0	0
A0A158NGM1	UP000005205	Atta cephalotes	Arthropoda	Metazoa	0	0	0	0	0	0	0	0	0	0	0	0	0	0	0	0	0	0	0	0	0	0	0	0	0	0	0	0	0	0	0	0	0	0	0	0	0	0	0	0	1	0	0	0	0
A0A3P6SKA5	UP000277928	Litomosoides sigmodontis	Nematoda	Metazoa	0	0	0	0	0	0	0	0	0	0	0	0	0	0	0	0	0	0	0	0	0	0	0	0	0	0	0	0	0	0	0	0	0	0	0	0	0	0	0	0	1	0	0	0	0
A0A498S7Y8	UP000276991	Acanthocheilonema viteae	Nematoda	Metazoa	0	0	0	0	0	0	0	0	0	0	0	0	0	0	0	0	0	0	0	0	0	0	0	0	0	0	0	0	0	0	0	0	0	0	0	0	0	0	0	0	1	0	0	0	0
A0A8R2JL56	UP000007819	Acyrthosiphon pisum	Arthropoda	Metazoa	0	0	0	0	0	0	0	0	0	0	0	0	0	0	0	0	0	0	0	0	0	0	0	0	0	0	0	0	0	0	0	0	0	0	0	0	0	0	0	0	0	0	0	0	0
A0A553P471	UP000318571	Tigriopus californicus	Arthropoda	Metazoa	0	0	0	0	0	0	0	0	0	0	0	0	0	0	0	0	0	0	0	0	0	0	0	0	0	0	0	0	0	0	0	0	0	0	0	0	0	0	0	0	1	0	0	0	0
A0A8S1DTX7	UP000494165	Cloeon dipterum	Arthropoda	Metazoa	0	0	0	0	0	0	0	0	0	0	0	0	0	0	0	0	0	0	0	0	0	0	0	0	0	0	0	0	0	0	0	0	0	0	0	0	0	0	0	0	1	0	0	0	0
A0A915PZK5	UP000887581	Setaria digitata	Nematoda	Metazoa	0	0	0	0	0	0	0	0	0	0	0	0	0	0	0	0	0	0	0	0	0	0	0	0	0	0	0	0	0	0	0	0	0	0	0	0	0	0	0	0	1	0	0	0	0
A0A9P0TNY7	UP001152562	Pieris brassicae	Arthropoda	Metazoa	0	0	0	0	0	0	0	0	0	0	0	0	0	0	0	0	0	0	0	0	0	0	0	0	0	0	0	0	0	0	0	0	0	0	0	0	0	0	0	0	1	0	0	0	0
A0A2J7R9I6	UP000235965	Cryptotermes secundus	Arthropoda	Metazoa	0	0	0	0	0	0	0	0	0	0	0	0	0	0	0	0	0	0	0	0	0	0	0	0	0	0	0	0	0	0	0	0	0	0	0	0	0	0	0	0	0	0	0	0	0
A0A433U7Y4	UP000271974	Elysia chlorotica	Mollusca	Metazoa	0	0	0	0	0	0	0	0	0	0	0	0	0	0	0	0	0	0	0	0	0	0	0	0	0	0	0	0	0	0	0	0	0	0	0	0	0	0	0	0	1	0	0	0	0
E3LHP3	UP000008281	Caenorhabditis remanei	Nematoda	Metazoa	0	0	0	0	0	0	0	0	0	0	0	0	0	0	0	0	0	0	0	0	0	0	0	0	0	0	0	0	0	0	0	0	0	0	0	0	0	0	0	0	0	0	0	0	0
A0A5N4B5Y5	UP000327044	Photinus pyralis	Arthropoda	Metazoa	0	0	0	0	0	0	0	0	0	0	0	0	0	0	0	0	0	0	0	0	0	0	0	0	0	0	0	0	0	0	0	0	0	0	0	0	0	0	0	0	1	0	0	0	0
A0A8R1DW79	UP000005237	Caenorhabditis japonica	Nematoda	Metazoa	0	0	0	0	0	0	0	0	0	0	0	0	0	0	0	0	0	0	0	0	0	0	0	0	0	0	0	0	0	0	0	0	0	0	0	0	0	0	0	0	1	0	0	0	0
A0A8S1D930	UP000494165	Cloeon dipterum	Arthropoda	Metazoa	0	0	0	0	0	0	0	0	0	0	0	0	0	0	0	0	0	0	0	0	0	0	0	0	0	0	0	0	0	0	0	0	0	0	0	0	0	0	0	0	1	0	0	0	0
A0A8S1CLW3	UP000494165	Cloeon dipterum	Arthropoda	Metazoa	0	0	0	0	0	0	0	0	0	0	0	0	0	0	0	0	0	0	0	0	0	0	0	0	0	0	0	0	0	0	0	0	0	0	0	0	0	0	0	0	1	0	0	0	0
A0A2G5TAF6	UP000230233	Caenorhabditis nigoni	Nematoda	Metazoa	0	0	0	0	0	0	0	0	0	0	0	0	0	0	0	0	0	0	0	0	0	0	0	0	0	0	0	0	0	0	0	0	0	0	0	0	0	0	0	0	1	0	0	0	0
A0A815MU01	UP000663835	Rotaria sp. Silwood1	Rotifera	Metazoa	0	0	0	0	0	0	0	0	0	0	0	0	0	0	0	0	0	0	0	0	0	0	0	0	0	0	0	0	0	0	0	0	0	0	0	0	0	0	0	0	0	0	0	0	0
A0A7R9MBB0	UP000728032	Oppiella nova	Arthropoda	Metazoa	0	0	0	0	0	0	0	0	0	0	0	0	0	0	0	0	0	0	0	0	0	0	0	0	0	0	0	0	0	0	0	0	0	0	0	0	0	0	0	0	0	0	0	0	0
A0A8S1CEH0	UP000494165	Cloeon dipterum	Arthropoda	Metazoa	0	0	0	0	0	0	0	0	0	0	0	0	0	0	0	0	0	0	0	0	0	0	0	0	0	0	0	0	0	0	0	0	0	0	0	0	0	0	0	0	1	0	0	0	0
A0A498SNJ9	UP000276991	Acanthocheilonema viteae	Nematoda	Metazoa	0	0	0	0	0	0	0	0	0	0	0	0	0	0	0	0	0	0	0	0	0	0	0	0	0	0	0	0	0	0	0	0	0	0	0	0	0	0	0	0	1	0	0	0	0
A0A9P1AIY0	UP001153352	Caenorhabditis sp. 36 PRJEB53466	Nematoda	Metazoa	0	0	0	0	0	0	0	0	0	0	0	0	0	0	0	0	0	0	0	0	0	0	0	0	0	0	0	0	0	0	0	0	0	0	0	0	0	0	0	0	1	0	0	0	0
A0A5E4BZJ6	UP000335636	Marmota monax	Chordata	Metazoa	0	0	0	0	0	0	0	0	0	0	0	0	0	0	0	0	0	0	0	0	0	0	0	0	0	0	0	0	0	0	0	0	0	0	0	0	0	0	0	0	1	0	0	0	0
A0A815EEM2	UP000663828	Adineta ricciae	Rotifera	Metazoa	0	0	0	0	0	0	0	0	0	0	0	0	0	0	0	0	0	0	0	0	0	0	0	0	0	0	0	0	0	0	0	0	0	0	0	0	0	0	0	0	0	0	0	0	0
A0A1Y1KFT6	UP000327044	Photinus pyralis	Arthropoda	Metazoa	0	0	0	0	0	0	0	0	0	0	0	0	0	0	0	0	0	0	0	0	0	0	0	0	0	0	0	0	0	0	0	0	0	0	0	0	0	0	0	0	1	0	0	0	0
A0A1V4L162	UP000190648	Patagioenas fasciata	Chordata	Metazoa	0	0	0	0	0	0	0	0	0	0	0	0	0	0	0	0	0	0	0	0	0	0	0	0	0	0	0	0	0	0	0	0	0	0	0	0	0	0	0	0	0	0	0	0	0
A0A553NCI6	UP000318571	Tigriopus californicus	Arthropoda	Metazoa	0	0	0	0	0	0	0	0	0	0	0	0	0	0	0	0	0	0	0	0	0	0	0	0	0	0	0	0	0	0	0	0	0	0	0	0	0	0	0	0	1	0	0	0	0
A0A2A4IUY8	UP000218220	Heliothis virescens	Arthropoda	Metazoa	0	0	0	0	0	0	0	0	0	0	0	0	0	0	0	0	0	0	0	0	0	0	0	0	0	0	0	0	0	0	0	0	0	0	0	0	0	0	0	0	0	0	0	0	0
T1JMK8	UP000014500	Strigamia maritima	Arthropoda	Metazoa	0	0	0	0	0	0	0	0	0	0	0	0	0	0	0	0	0	0	0	0	0	0	0	0	0	0	0	0	0	0	0	0	0	0	0	0	0	0	0	0	0	0	0	0	0
A0A158NCK2	UP000005205	Atta cephalotes	Arthropoda	Metazoa	0	0	0	0	0	0	0	0	0	0	0	0	0	0	0	0	0	0	0	0	0	0	0	0	0	0	0	0	0	0	0	0	0	0	0	0	0	0	0	0	1	0	0	0	0
A0A6G0SYT9	UP000475862	Aphis glycines	Arthropoda	Metazoa	0	0	0	0	0	0	0	0	0	0	0	0	0	0	0	0	0	0	0	0	0	0	0	0	0	0	0	0	0	0	0	0	0	0	0	0	0	0	0	0	1	0	0	0	0
A0A6G0T1V8	UP000475862	Aphis glycines	Arthropoda	Metazoa	0	0	0	0	0	0	0	0	0	0	0	0	0	0	0	0	0	0	0	0	0	0	0	0	0	0	0	0	0	0	0	0	0	0	0	0	0	0	0	0	1	0	0	0	0
A0A3Q3A3U9	UP000264800	Kryptolebias marmoratus	Chordata	Metazoa	0	0	0	0	0	0	0	0	0	0	0	0	0	0	0	0	0	0	0	0	0	0	0	0	0	0	0	0	0	0	0	0	0	0	0	0	0	0	0	0	0	0	0	0	0
A0A820PLI3	UP000663884	Rotaria sp. Silwood2	Rotifera	Metazoa	0	0	0	0	0	0	0	0	0	0	0	0	0	0	0	0	0	0	0	0	0	0	0	0	0	0	0	0	0	0	0	0	0	0	0	0	0	0	0	0	0	0	0	0	0
A0A3Q2D7M8	UP000265020	Cyprinodon variegatus	Chordata	Metazoa	0	0	0	0	0	0	0	0	0	0	0	0	0	0	0	0	0	0	0	0	0	0	0	0	0	0	0	0	0	0	0	0	0	0	0	0	0	0	0	0	0	0	0	0	0
T1IXK7	UP000014500	Strigamia maritima	Arthropoda	Metazoa	0	0	0	0	0	0	0	0	0	0	0	0	0	0	0	0	0	0	0	0	0	0	0	0	0	0	0	0	0	0	0	0	0	0	0	0	0	0	0	0	1	0	0	0	0
A0A815CVY4	UP000663828	Adineta ricciae	Rotifera	Metazoa	0	0	0	0	0	0	0	0	0	0	0	0	0	0	0	0	0	0	0	0	0	0	0	0	0	0	0	0	0	0	0	0	0	0	0	0	0	0	0	0	0	0	0	0	0
A0A8C6VPA1	UP000694559	Naja naja	Chordata	Metazoa	0	0	0	0	0	0	0	0	0	0	0	0	0	0	0	0	0	0	0	0	0	0	0	0	0	0	0	0	0	0	0	0	0	0	0	0	0	0	0	0	0	0	0	0	0
A0A8C5NL78	UP000694408	Junco hyemalis	Chordata	Metazoa	0	0	0	0	0	0	0	0	0	0	0	0	0	0	0	0	0	0	0	0	0	0	0	0	0	0	0	0	0	0	0	0	0	0	0	0	0	0	0	0	0	0	0	0	0
G0P1T4	UP000008068	Caenorhabditis brenneri	Nematoda	Metazoa	0	0	0	0	0	0	0	0	0	0	0	0	0	0	0	0	0	0	0	0	0	0	0	0	0	0	0	0	0	0	0	0	0	0	0	0	0	0	0	0	0	0	0	0	0
A0A553PRV3	UP000318571	Tigriopus californicus	Arthropoda	Metazoa	0	0	0	0	0	0	0	0	0	0	0	0	0	0	0	0	0	0	0	0	0	0	0	0	0	0	0	0	0	0	0	0	0	0	0	0	0	0	0	0	1	0	0	0	0
A0A8S1GRS2	UP000835052	Caenorhabditis auriculariae	Nematoda	Metazoa	0	0	0	0	0	0	0	0	0	0	0	0	0	0	0	0	0	0	0	0	0	0	0	0	0	0	0	0	0	0	0	0	0	0	0	0	0	0	0	0	0	0	0	0	0
A0A815H5D1	UP000663828	Adineta ricciae	Rotifera	Metazoa	0	0	0	0	0	0	0	0	0	0	0	0	0	0	0	0	0	0	0	0	0	0	0	0	0	0	0	0	0	0	0	0	0	0	0	0	0	0	0	0	0	0	0	0	0
A0A6G0T0L4	UP000475862	Aphis glycines	Arthropoda	Metazoa	0	0	0	0	0	0	0	0	0	0	0	0	0	0	0	0	0	0	0	0	0	0	0	0	0	0	0	0	0	0	0	0	0	0	0	0	0	0	0	0	1	0	0	0	0
E3MK29	UP000008281	Caenorhabditis remanei	Nematoda	Metazoa	0	0	0	0	0	0	0	0	0	0	0	0	0	0	0	0	0	0	0	0	0	0	0	0	0	0	0	0	0	0	0	0	0	0	0	0	0	0	0	0	1	0	0	0	0
A0A8S1HPA8	UP000835052	Caenorhabditis auriculariae	Nematoda	Metazoa	0	0	0	0	0	0	0	0	0	0	0	0	0	0	0	0	0	0	0	0	0	0	0	0	0	0	0	0	0	0	0	0	0	0	0	0	0	0	0	0	1	0	0	0	0
G0MDW6	UP000008068	Caenorhabditis brenneri	Nematoda	Metazoa	0	0	0	0	0	0	0	0	0	0	0	0	0	0	0	0	0	0	0	0	0	0	0	0	0	0	0	0	0	0	0	0	0	0	0	0	0	0	0	0	0	0	0	0	0
A0AA38IAJ5	UP001168821	Zophobas morio	Arthropoda	Metazoa	0	0	0	0	0	0	0	0	0	0	0	0	0	0	0	0	0	0	0	0	0	0	0	0	0	0	0	0	0	0	0	0	0	0	0	0	0	0	0	0	0	0	0	0	0
A0A5N3XAM7	UP000326062	Muntiacus reevesi	Chordata	Metazoa	0	0	0	0	0	0	0	0	0	0	0	0	0	0	0	0	0	0	0	0	0	0	0	0	0	0	0	0	0	0	0	0	0	0	0	0	0	0	0	0	1	0	0	0	0
A0A2G5SB94	UP000230233	Caenorhabditis nigoni	Nematoda	Metazoa	0	0	0	0	0	0	0	0	0	0	0	0	0	0	0	0	0	0	0	0	0	0	0	0	0	0	0	0	0	0	0	0	0	0	0	0	0	0	0	0	1	0	0	0	0
A0A819SR03	UP000663884	Rotaria sp. Silwood2	Rotifera	Metazoa	0	0	0	0	0	0	0	0	0	0	0	0	0	0	0	0	0	0	0	0	0	0	0	0	0	0	0	0	0	0	0	0	0	0	0	0	0	0	0	0	0	0	0	0	0
A0A820AA49	UP000663884	Rotaria sp. Silwood2	Rotifera	Metazoa	0	0	0	0	0	0	0	0	0	0	0	0	0	0	0	0	0	0	0	0	0	0	0	0	0	0	0	0	0	0	0	0	0	0	0	0	0	0	0	0	0	0	0	0	0
A0A816GXL5	UP000663828	Adineta ricciae	Rotifera	Metazoa	0	0	0	0	0	0	0	0	0	0	0	0	0	0	0	0	0	0	0	0	0	0	0	0	0	0	0	0	0	0	0	0	0	0	0	0	0	0	0	0	0	0	0	0	0
G0NEU0	UP000008068	Caenorhabditis brenneri	Nematoda	Metazoa	0	0	0	0	0	0	0	0	0	0	0	0	0	0	0	0	0	0	0	0	0	0	0	0	0	0	0	0	0	0	0	0	0	0	0	0	0	0	0	0	1	0	0	0	0
A0A2G5VHI2	UP000230233	Caenorhabditis nigoni	Nematoda	Metazoa	0	0	0	0	0	0	0	0	0	0	0	0	0	0	0	0	0	0	0	0	0	0	0	0	0	0	0	0	0	0	0	0	0	0	0	0	0	0	0	0	1	0	0	0	0
A0A9J6BRT7	UP001107558	Polypedilum vanderplanki	Arthropoda	Metazoa	0	0	0	0	0	0	0	0	0	0	0	0	0	0	0	0	0	0	0	0	0	0	0	0	0	0	0	0	0	0	0	0	0	0	0	0	0	0	0	0	0	0	0	0	0
A0A9P1F385	UP001153352	Caenorhabditis sp. 36 PRJEB53466	Nematoda	Metazoa	0	0	0	0	0	0	0	0	0	0	0	0	0	0	0	0	0	0	0	0	0	0	0	0	0	0	0	0	0	0	0	0	0	0	0	0	0	0	0	0	1	0	0	0	0
A0A7R8UIH1	UP000594454	Hermetia illucens	Arthropoda	Metazoa	0	0	0	0	0	0	0	0	0	0	0	0	0	0	0	0	0	0	0	0	0	0	0	0	0	0	0	0	0	0	0	0	0	0	0	0	0	0	0	0	0	0	0	0	0
A0A9P1MVC5	UP001152747	Caenorhabditis angaria	Nematoda	Metazoa	0	0	0	0	0	0	0	0	0	0	0	0	0	0	0	0	0	0	0	0	0	0	0	0	0	0	0	0	0	0	0	0	0	0	0	0	0	0	0	0	1	0	0	0	0
A0A2G5UY81	UP000230233	Caenorhabditis nigoni	Nematoda	Metazoa	0	0	0	0	0	0	0	0	0	0	0	0	0	0	0	0	0	0	0	0	0	0	0	0	0	0	0	0	0	0	0	0	0	0	0	0	0	0	0	0	1	0	0	0	0
A0A2A2JA98	UP000218231	Diploscapter pachys	Nematoda	Metazoa	0	0	0	0	0	0	0	0	0	0	0	0	0	0	0	0	0	0	0	0	0	0	0	0	0	0	0	0	0	0	0	0	0	0	0	0	0	0	0	0	0	0	0	0	0
G0N9K4	UP000008068	Caenorhabditis brenneri	Nematoda	Metazoa	0	0	0	0	0	0	0	0	0	0	0	0	0	0	0	0	0	0	0	0	0	0	0	0	0	0	0	0	0	0	0	0	0	0	0	0	0	0	0	0	1	0	0	0	0
A0A6L2PU27	UP000502823	Coptotermes formosanus	Arthropoda	Metazoa	0	0	0	0	0	0	0	0	0	0	0	0	0	0	0	0	0	0	0	0	0	0	0	0	0	0	0	0	0	0	0	0	0	0	0	0	0	0	0	0	1	0	0	0	0
A0A553NFY8	UP000318571	Tigriopus californicus	Arthropoda	Metazoa	0	0	0	0	0	0	0	0	0	0	0	0	0	0	0	0	0	0	0	0	0	0	0	0	0	0	0	0	0	0	0	0	0	0	0	0	0	0	0	0	1	0	0	0	0
G0PF46	UP000008068	Caenorhabditis brenneri	Nematoda	Metazoa	0	0	0	0	0	0	0	0	0	0	0	0	0	0	0	0	0	0	0	0	0	0	0	0	0	0	0	0	0	0	0	0	0	0	0	0	0	0	0	0	1	0	0	0	0
U4U9U5	UP000030742	Dendroctonus ponderosae	Arthropoda	Metazoa	0	0	0	0	0	0	0	0	0	0	0	0	0	0	0	0	0	0	0	0	0	0	0	0	0	0	0	0	0	0	0	0	0	0	0	0	0	0	0	0	1	0	0	0	0
E3LYC9	UP000008281	Caenorhabditis remanei	Nematoda	Metazoa	0	0	0	0	0	0	0	0	0	0	0	0	0	0	0	0	0	0	0	0	0	0	0	0	0	0	0	0	0	0	0	0	0	0	0	0	0	0	0	0	1	0	0	0	0
A0A2G5V5N3	UP000230233	Caenorhabditis nigoni	Nematoda	Metazoa	0	0	0	0	0	0	0	0	0	0	0	0	0	0	0	0	0	0	0	0	0	0	0	0	0	0	0	0	0	0	0	0	0	0	0	0	0	0	0	0	1	0	0	0	0
A0A815HP47	UP000663835	Rotaria sp. Silwood1	Rotifera	Metazoa	0	0	0	0	0	0	0	0	0	0	0	0	0	0	0	0	0	0	0	0	0	0	0	0	0	0	0	0	0	0	0	0	0	0	0	0	0	0	0	0	0	0	0	0	0
A0A9P1A8K6	UP001153352	Caenorhabditis sp. 36 PRJEB53466	Nematoda	Metazoa	0	0	0	0	0	0	0	0	0	0	0	0	0	0	0	0	0	0	0	0	0	0	0	0	0	0	0	0	0	0	0	0	0	0	0	0	0	0	0	0	1	0	0	0	0
A0A9P1MV90	UP001152747	Caenorhabditis angaria	Nematoda	Metazoa	0	0	0	0	0	0	0	0	0	0	0	0	0	0	0	0	0	0	0	0	0	0	0	0	0	0	0	0	0	0	0	0	0	0	0	0	0	0	0	0	1	0	0	0	0
A0A3P9CPB5	UP000265160	Maylandia zebra	Chordata	Metazoa	0	0	0	0	0	0	0	0	0	0	0	0	0	0	0	0	0	0	0	0	0	0	0	0	0	0	0	0	0	0	0	0	0	0	0	0	0	0	0	0	0	0	0	0	0
A0A9P1A6N2	UP001153352	Caenorhabditis sp. 36 PRJEB53466	Nematoda	Metazoa	0	0	0	0	0	0	0	0	0	0	0	0	0	0	0	0	0	0	0	0	0	0	0	0	0	0	0	0	0	0	0	0	0	0	0	0	0	0	0	0	1	0	0	0	0
E3LGG2	UP000008281	Caenorhabditis remanei	Nematoda	Metazoa	0	0	0	0	0	0	0	0	0	0	0	0	0	0	0	0	0	0	0	0	0	0	0	0	0	0	0	0	0	0	0	0	0	0	0	0	0	0	0	0	1	0	0	0	0
A0A8S1DAB8	UP000494165	Cloeon dipterum	Arthropoda	Metazoa	0	0	0	0	0	0	0	0	0	0	0	0	0	0	0	0	0	0	0	0	0	0	0	0	0	0	0	0	0	0	0	0	0	0	0	0	0	0	0	0	0	0	0	0	0
E3LV53	UP000008281	Caenorhabditis remanei	Nematoda	Metazoa	0	0	0	0	0	0	0	0	0	0	0	0	0	0	0	0	0	0	0	0	0	0	0	0	0	0	0	0	0	0	0	0	0	0	0	0	0	0	0	0	1	0	0	0	0
A0A2G5VFI2	UP000230233	Caenorhabditis nigoni	Nematoda	Metazoa	0	0	0	0	0	0	0	0	0	0	0	0	0	0	0	0	0	0	0	0	0	0	0	0	0	0	0	0	0	0	0	0	0	0	0	0	0	0	0	0	1	0	0	0	0
A0A816D632	UP000663835	Rotaria sp. Silwood1	Rotifera	Metazoa	0	0	0	0	0	0	0	0	0	0	0	0	0	0	0	0	0	0	0	0	0	0	0	0	0	0	0	0	0	0	0	0	0	0	0	0	0	0	0	0	0	0	0	0	0
E3N6P6	UP000008281	Caenorhabditis remanei	Nematoda	Metazoa	0	0	0	0	0	0	0	0	0	0	0	0	0	0	0	0	0	0	0	0	0	0	0	0	0	0	0	0	0	0	0	0	0	0	0	0	0	0	0	0	1	0	0	0	0
A0A8S3PQD5	UP000683360	Mytilus edulis	Mollusca	Metazoa	0	0	0	0	0	0	0	0	0	0	0	0	0	0	0	0	0	0	0	0	0	0	0	0	0	0	0	0	0	0	0	0	0	0	0	0	0	0	0	0	0	0	0	0	0
E3LVG6	UP000008281	Caenorhabditis remanei	Nematoda	Metazoa	0	0	0	0	0	0	0	0	0	0	0	0	0	0	0	0	0	0	0	0	0	0	0	0	0	0	0	0	0	0	0	0	0	0	0	0	0	0	0	0	1	0	0	0	0
A0A9P1A7Z7	UP001153352	Caenorhabditis sp. 36 PRJEB53466	Nematoda	Metazoa	0	0	0	0	0	0	0	0	0	0	0	0	0	0	0	0	0	0	0	0	0	0	0	0	0	0	0	0	0	0	0	0	0	0	0	0	0	0	0	0	1	0	0	0	0
A0A8R1DKX7	UP000005237	Caenorhabditis japonica	Nematoda	Metazoa	0	0	0	0	0	0	0	0	0	0	0	0	0	0	0	0	0	0	0	0	0	0	0	0	0	0	0	0	0	0	0	0	0	0	0	0	0	0	0	0	1	0	0	0	0
A0A8S1F6J5	UP000494206	Caenorhabditis bovis	Nematoda	Metazoa	0	0	0	0	0	0	0	0	0	0	0	0	0	0	0	0	0	0	0	0	0	0	0	0	0	0	0	0	0	0	0	0	0	0	0	0	0	0	0	0	1	0	0	0	0
E3M362	UP000008281	Caenorhabditis remanei	Nematoda	Metazoa	0	0	0	0	0	0	0	0	0	0	0	0	0	0	0	0	0	0	0	0	0	0	0	0	0	0	0	0	0	0	0	0	0	0	0	0	0	0	0	0	1	0	0	0	0
A0A8S1DCX5	UP000494165	Cloeon dipterum	Arthropoda	Metazoa	0	0	0	0	0	0	0	0	0	0	0	0	0	0	0	0	0	0	0	0	0	0	0	0	0	0	0	0	0	0	0	0	0	0	0	0	0	0	0	0	1	0	0	0	0
Q9N585	UP000001940	Caenorhabditis elegans	Nematoda	Metazoa	0	0	0	0	0	0	0	0	0	0	0	0	0	0	0	0	0	0	0	0	0	0	0	0	0	0	0	0	0	0	0	0	0	0	0	0	0	0	0	0	1	0	0	0	0
G0NQP0	UP000008068	Caenorhabditis brenneri	Nematoda	Metazoa	0	0	0	0	0	0	0	0	0	0	0	0	0	0	0	0	0	0	0	0	0	0	0	0	0	0	0	0	0	0	0	0	0	0	0	0	0	0	0	0	1	0	0	0	0
A0A8W8MXD6	UP000005408	Magallana gigas	Mollusca	Metazoa	0	0	0	0	0	0	0	0	0	0	0	0	0	0	0	0	0	0	0	0	0	0	0	0	0	0	0	0	0	0	0	0	0	0	0	0	0	0	0	0	0	0	0	0	0
A0A7R9MJK9	UP000728032	Oppiella nova	Arthropoda	Metazoa	0	0	0	0	0	0	0	0	0	0	0	0	0	0	0	0	0	0	0	0	0	0	0	0	0	0	0	0	0	0	0	0	0	0	0	0	0	0	0	0	0	0	0	0	0
E3M1J8	UP000008281	Caenorhabditis remanei	Nematoda	Metazoa	0	0	0	0	0	0	0	0	0	0	0	0	0	0	0	0	0	0	0	0	0	0	0	0	0	0	0	0	0	0	0	0	0	0	0	0	0	0	0	0	1	0	0	0	0
A0A2K5VAL0	UP000233100	Macaca fascicularis	Chordata	Metazoa	0	0	0	0	0	0	0	0	0	0	0	0	0	0	0	0	0	0	0	0	0	0	0	0	0	0	0	0	0	0	0	0	0	0	0	0	0	0	0	0	0	0	0	0	0
G0PAC2	UP000008068	Caenorhabditis brenneri	Nematoda	Metazoa	0	0	0	0	0	0	0	0	0	0	0	0	0	0	0	0	0	0	0	0	0	0	0	0	0	0	0	0	0	0	0	0	0	0	0	0	0	0	0	0	1	0	0	0	0
A0A9P1I742	UP001152747	Caenorhabditis angaria	Nematoda	Metazoa	0	0	0	0	0	0	0	0	0	0	0	0	0	0	0	0	0	0	0	0	0	0	0	0	0	0	0	0	0	0	0	0	0	0	0	0	0	0	0	0	1	0	0	0	0
E3N4Y0	UP000008281	Caenorhabditis remanei	Nematoda	Metazoa	0	0	0	0	0	0	0	0	0	0	0	0	0	0	0	0	0	0	0	0	0	0	0	0	0	0	0	0	0	0	0	0	0	0	0	0	0	0	0	0	1	0	0	0	0
A0A9P1AJD2	UP001153352	Caenorhabditis sp. 36 PRJEB53466	Nematoda	Metazoa	0	0	0	0	0	0	0	0	0	0	0	0	0	0	0	0	0	0	0	0	0	0	0	0	0	0	0	0	0	0	0	0	0	0	0	0	0	0	0	0	1	0	0	0	0
G0NV13	UP000008068	Caenorhabditis brenneri	Nematoda	Metazoa	0	0	0	0	0	0	0	0	0	0	0	0	0	0	0	0	0	0	0	0	0	0	0	0	0	0	0	0	0	0	0	0	0	0	0	0	0	0	0	0	1	0	0	0	0
G0NKB5	UP000008068	Caenorhabditis brenneri	Nematoda	Metazoa	0	0	0	0	0	0	0	0	0	0	0	0	0	0	0	0	0	0	0	0	0	0	0	0	0	0	0	0	0	0	0	0	0	0	0	0	0	0	0	0	1	0	0	0	0
A0A484BHQ2	UP000295192	Drosophila navojoa	Arthropoda	Metazoa	0	0	0	0	0	0	0	0	0	0	0	0	0	0	0	0	0	0	0	0	0	0	0	0	0	0	0	0	0	0	0	0	0	0	0	0	0	0	0	0	0	0	0	0	0
A0A2G5VJH5	UP000230233	Caenorhabditis nigoni	Nematoda	Metazoa	0	0	0	0	0	0	0	0	0	0	0	0	0	0	0	0	0	0	0	0	0	0	0	0	0	0	0	0	0	0	0	0	0	0	0	0	0	0	0	0	1	0	0	0	0
A0A821BY29	UP000663884	Rotaria sp. Silwood2	Rotifera	Metazoa	0	0	0	0	0	0	0	0	0	0	0	0	0	0	0	0	0	0	0	0	0	0	0	0	0	0	0	0	0	0	0	0	0	0	0	0	0	0	0	0	0	0	0	0	0
A0A8C4BW95	UP000694580	Denticeps clupeoides	Chordata	Metazoa	0	0	0	0	0	0	0	0	0	0	0	0	0	0	0	0	0	0	0	0	0	0	0	0	0	0	0	0	0	0	0	0	0	0	0	0	0	0	0	0	0	0	0	0	0
A0A2G5TJ90	UP000230233	Caenorhabditis nigoni	Nematoda	Metazoa	0	0	0	0	0	0	0	0	0	0	0	0	0	0	0	0	0	0	0	0	0	0	0	0	0	0	0	0	0	0	0	0	0	0	0	0	0	0	0	0	1	0	0	0	0
A0A8S1EXE8	UP000494206	Caenorhabditis bovis	Nematoda	Metazoa	0	0	0	0	0	0	0	0	0	0	0	0	0	0	0	0	0	0	0	0	0	0	0	0	0	0	0	0	0	0	0	0	0	0	0	0	0	0	0	0	1	0	0	0	0
A0A7R9QVP1	UP000728032	Oppiella nova	Arthropoda	Metazoa	0	0	0	0	0	0	0	0	0	0	0	0	0	0	0	0	0	0	0	0	0	0	0	0	0	0	0	0	0	0	0	0	0	0	0	0	0	0	0	0	0	0	0	0	0
A0A7R9LYW5	UP000728032	Oppiella nova	Arthropoda	Metazoa	0	0	0	0	0	0	0	0	0	0	0	0	0	0	0	0	0	0	0	0	0	0	0	0	0	0	0	0	0	0	0	0	0	0	0	0	0	0	0	0	1	0	0	0	0
E3MCT6	UP000008281	Caenorhabditis remanei	Nematoda	Metazoa	0	0	0	0	0	0	0	0	0	0	0	0	0	0	0	0	0	0	0	0	0	0	0	0	0	0	0	0	0	0	0	0	0	0	0	0	0	0	0	0	1	0	0	0	0
A0A5E4CV26	UP000335636	Marmota monax	Chordata	Metazoa	0	0	0	0	0	0	0	0	0	0	0	0	0	0	0	0	0	0	0	0	0	0	0	0	0	0	0	0	0	0	0	0	0	0	0	0	0	0	0	0	0	0	0	0	0
A0A816EBK9	UP000663828	Adineta ricciae	Rotifera	Metazoa	0	0	0	0	0	0	0	0	0	0	0	0	0	0	0	0	0	0	0	0	0	0	0	0	0	0	0	0	0	0	0	0	0	0	0	0	0	0	0	0	0	0	0	0	0
A0A7R9KEN8	UP000759131	Medioppia subpectinata	Arthropoda	Metazoa	0	0	0	0	0	0	0	0	0	0	0	0	0	0	0	0	0	0	0	0	0	0	0	0	0	0	0	0	0	0	0	0	0	0	0	0	0	0	0	0	0	0	0	0	0
A0A816EHD2	UP000663828	Adineta ricciae	Rotifera	Metazoa	0	0	0	0	0	0	0	0	0	0	0	0	0	0	0	0	0	0	0	0	0	0	0	0	0	0	0	0	0	0	0	0	0	0	0	0	0	0	0	0	0	0	0	0	0
A0A016TJW9	UP000024635	Ancylostoma ceylanicum	Nematoda	Metazoa	0	0	0	0	0	0	0	0	0	0	0	0	0	0	0	0	0	0	0	0	0	0	0	0	0	0	0	0	0	0	0	0	0	0	0	0	0	0	0	0	0	0	0	0	0
A0A7R9M3K4	UP000728032	Oppiella nova	Arthropoda	Metazoa	0	0	0	0	0	0	0	0	0	0	0	0	0	0	0	0	0	0	0	0	0	0	0	0	0	0	0	0	0	0	0	0	0	0	0	0	0	0	0	0	0	0	0	0	0
A0A7R9QS69	UP000728032	Oppiella nova	Arthropoda	Metazoa	0	0	0	0	0	0	0	0	0	0	0	0	0	0	0	0	0	0	0	0	0	0	0	0	0	0	0	0	0	0	0	0	0	0	0	0	0	0	0	0	0	0	0	0	0
A0AA36GJG7	UP001176961	Cylicocyclus nassatus	Nematoda	Metazoa	0	0	0	0	0	0	0	0	0	0	0	0	0	0	0	0	0	0	0	0	0	0	0	0	0	0	0	0	0	0	0	0	0	0	0	0	0	0	0	0	0	0	0	0	0
A0A2G5VGI7	UP000230233	Caenorhabditis nigoni	Nematoda	Metazoa	0	0	0	0	0	0	0	0	0	0	0	0	0	0	0	0	0	0	0	0	0	0	0	0	0	0	0	0	0	0	0	0	0	0	0	0	0	0	0	0	1	0	0	0	0
A0AA36DLU7	UP001176961	Cylicocyclus nassatus	Nematoda	Metazoa	0	0	0	0	0	0	0	0	0	0	0	0	0	0	0	0	0	0	0	0	0	0	0	0	0	0	0	0	0	0	0	0	0	0	0	0	0	0	0	0	0	0	0	0	0
A0A913XE12	UP000887567	Exaiptasia diaphana	Cnidaria	Metazoa	0	0	0	0	0	0	0	0	0	0	0	0	0	0	0	0	0	0	0	0	0	0	0	0	0	0	0	0	0	0	0	0	0	0	0	0	0	0	0	0	0	0	0	0	0
A0A158NXG3	UP000005205	Atta cephalotes	Arthropoda	Metazoa	0	0	0	0	0	0	0	0	0	0	0	0	0	0	0	0	0	0	0	0	0	0	0	0	0	0	0	0	0	0	0	0	0	0	0	0	0	0	0	0	0	0	0	0	0
A0AA36DJH3	UP001176961	Cylicocyclus nassatus	Nematoda	Metazoa	0	0	0	0	0	0	0	0	0	0	0	0	0	0	0	0	0	0	0	0	0	0	0	0	0	0	0	0	0	0	0	0	0	0	0	0	0	0	0	0	0	0	0	0	0
A0A4W4H4H5	UP000314983	Electrophorus electricus	Chordata	Metazoa	0	0	0	0	0	0	0	0	0	0	0	0	0	0	0	0	0	0	0	0	0	0	0	0	0	0	0	0	0	0	0	0	0	0	0	0	0	0	0	0	0	0	0	0	0
A0A2G5V8S2	UP000230233	Caenorhabditis nigoni	Nematoda	Metazoa	0	0	0	0	0	0	0	0	0	0	0	0	0	0	0	0	0	0	0	0	0	0	0	0	0	0	0	0	0	0	0	0	0	0	0	0	0	0	0	0	1	0	0	0	0
A0A9P1EW92	UP001153352	Caenorhabditis sp. 36 PRJEB53466	Nematoda	Metazoa	0	0	0	0	0	0	0	0	0	0	0	0	0	0	0	0	0	0	0	0	0	0	0	0	0	0	0	0	0	0	0	0	0	0	0	0	0	0	0	0	1	0	0	0	0
A0AA39HDG4	UP001175271	Steinernema hermaphroditum	Nematoda	Metazoa	0	0	0	0	0	0	0	0	0	0	0	0	0	0	0	0	0	0	0	0	0	0	0	0	0	0	0	0	0	0	0	0	0	0	0	0	0	0	0	0	1	0	0	0	0
G0MUF0	UP000008068	Caenorhabditis brenneri	Nematoda	Metazoa	0	0	0	0	0	0	0	0	0	0	0	0	0	0	0	0	0	0	0	0	0	0	0	0	0	0	0	0	0	0	0	0	0	0	0	0	0	0	0	0	1	0	0	0	0
A0A9P1MWQ2	UP001152747	Caenorhabditis angaria	Nematoda	Metazoa	0	0	0	0	0	0	0	0	0	0	0	0	0	0	0	0	0	0	0	0	0	0	0	0	0	0	0	0	0	0	0	0	0	0	0	0	0	0	0	0	1	0	0	0	0
A0A0B2UQ61	UP000031036	Toxocara canis	Nematoda	Metazoa	0	0	0	0	0	0	0	0	0	0	0	0	0	0	0	0	0	0	0	0	0	0	0	0	0	0	0	0	0	0	0	0	0	0	0	0	0	0	0	0	0	0	0	0	0
G0PGD9	UP000008068	Caenorhabditis brenneri	Nematoda	Metazoa	0	0	0	0	0	0	0	0	0	0	0	0	0	0	0	0	0	0	0	0	0	0	0	0	0	0	0	0	0	0	0	0	0	0	0	0	0	0	0	0	1	0	0	0	0
A0A8R1DXK7	UP000005237	Caenorhabditis japonica	Nematoda	Metazoa	0	0	0	0	0	0	0	0	0	0	0	0	0	0	0	0	0	0	0	0	0	0	0	0	0	0	0	0	0	0	0	0	0	0	0	0	0	0	0	0	1	0	0	0	0
A0A8R1DJI3	UP000005237	Caenorhabditis japonica	Nematoda	Metazoa	0	0	0	0	0	0	0	0	0	0	0	0	0	0	0	0	0	0	0	0	0	0	0	0	0	0	0	0	0	0	0	0	0	0	0	0	0	0	0	0	1	0	0	0	0
A0A673FWD4	UP000472270	Sinocyclocheilus rhinocerous	Chordata	Metazoa	0	0	0	0	0	0	0	0	0	0	0	0	0	0	0	0	0	0	0	0	0	0	0	0	0	0	0	0	0	0	0	0	0	0	0	0	0	0	0	0	0	0	0	0	0
A0A2A6BQU6	UP000005239	Pristionchus pacificus	Nematoda	Metazoa	0	0	0	0	0	0	0	0	0	0	0	0	0	0	0	0	0	0	0	0	0	0	0	0	0	0	0	0	0	0	0	0	0	0	0	0	0	0	0	0	0	0	0	0	0
T1KDJ4	UP000015104	Tetranychus urticae	Arthropoda	Metazoa	0	0	0	0	0	0	0	0	0	0	0	0	0	0	0	0	0	0	0	0	0	0	0	0	0	0	0	0	0	0	0	0	0	0	0	0	0	0	0	0	1	0	0	0	0
E3M0N6	UP000008281	Caenorhabditis remanei	Nematoda	Metazoa	0	0	0	0	0	0	0	0	0	0	0	0	0	0	0	0	0	0	0	0	0	0	0	0	0	0	0	0	0	0	0	0	0	0	0	0	0	0	0	0	1	0	0	0	0
A0A9P1AYT3	UP001153352	Caenorhabditis sp. 36 PRJEB53466	Nematoda	Metazoa	0	0	0	0	0	0	0	0	0	0	0	0	0	0	0	0	0	0	0	0	0	0	0	0	0	0	0	0	0	0	0	0	0	0	0	0	0	0	0	0	1	0	0	0	0
A0A9P1N688	UP001152747	Caenorhabditis angaria	Nematoda	Metazoa	0	0	0	0	0	0	0	0	0	0	0	0	0	0	0	0	0	0	0	0	0	0	0	0	0	0	0	0	0	0	0	0	0	0	0	0	0	0	0	0	1	0	0	0	0
A0A8R1XXQ8	UP000024404	Onchocerca volvulus	Nematoda	Metazoa	0	0	0	0	0	0	0	0	0	0	0	0	0	0	0	0	0	0	0	0	0	0	0	0	0	0	0	0	0	0	0	0	0	0	0	0	0	0	0	0	1	0	0	0	0
A0A8S1FAQ3	UP000494206	Caenorhabditis bovis	Nematoda	Metazoa	0	0	0	0	0	0	0	0	0	0	0	0	0	0	0	0	0	0	0	0	0	0	0	0	0	0	0	0	0	0	0	0	0	0	0	0	0	0	0	0	1	0	0	0	0
H3BVK9	UP000007303	Tetraodon nigroviridis	Chordata	Metazoa	0	0	0	0	0	0	0	0	0	0	0	0	0	0	0	0	0	0	0	0	0	0	0	0	0	0	0	0	0	0	0	0	0	0	0	0	0	0	0	0	0	0	0	0	0
A0A7R9M4I1	UP000728032	Oppiella nova	Arthropoda	Metazoa	0	0	0	0	0	0	0	0	0	0	0	0	0	0	0	0	0	0	0	0	0	0	0	0	0	0	0	0	0	0	0	0	0	0	0	0	0	0	0	0	0	0	0	0	0
A0A9P1HP77	UP001154013	Auanema sp. JU1783	Nematoda	Metazoa	0	0	0	0	0	0	0	0	0	0	0	0	0	0	0	0	0	0	0	0	0	0	0	0	0	0	0	0	0	0	0	0	0	0	0	0	0	0	0	0	0	0	0	0	0
A0A9P1N8P2	UP001152747	Caenorhabditis angaria	Nematoda	Metazoa	0	0	0	0	0	0	0	0	0	0	0	0	0	0	0	0	0	0	0	0	0	0	0	0	0	0	0	0	0	0	0	0	0	0	0	0	0	0	0	0	1	0	0	0	0
G0NIZ3	UP000008068	Caenorhabditis brenneri	Nematoda	Metazoa	0	0	0	0	0	0	0	0	0	0	0	0	0	0	0	0	0	0	0	0	0	0	0	0	0	0	0	0	0	0	0	0	0	0	0	0	0	0	0	0	1	0	0	0	0
A0AA36CN95	UP001177023	Mesorhabditis spiculigera	Nematoda	Metazoa	0	0	0	0	0	0	0	0	0	0	0	0	0	0	0	0	0	0	0	0	0	0	0	0	0	0	0	0	0	0	0	0	0	0	0	0	0	0	0	0	0	0	0	0	0
A0A821IT81	UP000663873	Rotaria socialis	Rotifera	Metazoa	0	0	0	0	0	0	0	0	0	0	0	0	0	0	0	0	0	0	0	0	0	0	0	0	0	0	0	0	0	0	0	0	0	0	0	0	0	0	0	0	0	0	0	0	0
A0A9P1ISP6	UP001152747	Caenorhabditis angaria	Nematoda	Metazoa	0	0	0	0	0	0	0	0	0	0	0	0	0	0	0	0	0	0	0	0	0	0	0	0	0	0	0	0	0	0	0	0	0	0	0	0	0	0	0	0	1	0	0	0	0
A0A915PQ71	UP000887581	Setaria digitata	Nematoda	Metazoa	0	0	0	0	0	0	0	0	0	0	0	0	0	0	0	0	0	0	0	0	0	0	0	0	0	0	0	0	0	0	0	0	0	0	0	0	0	0	0	0	1	0	0	0	0
A0AA36GJD4	UP001176961	Cylicocyclus nassatus	Nematoda	Metazoa	0	0	0	0	0	0	0	0	0	0	0	0	0	0	0	0	0	0	0	0	0	0	0	0	0	0	0	0	0	0	0	0	0	0	0	0	0	0	0	0	1	0	0	0	0
A0A2A2KLH4	UP000218231	Diploscapter pachys	Nematoda	Metazoa	0	0	0	0	0	0	0	0	0	0	0	0	0	0	0	0	0	0	0	0	0	0	0	0	0	0	0	0	0	0	0	0	0	0	0	0	0	0	0	0	1	0	0	0	0
A0A8S1HV97	UP000835052	Caenorhabditis auriculariae	Nematoda	Metazoa	0	0	0	0	0	0	0	0	0	0	0	0	0	0	0	0	0	0	0	0	0	0	0	0	0	0	0	0	0	0	0	0	0	0	0	0	0	0	0	0	1	0	0	0	0
A0A016ULI0	UP000024635	Ancylostoma ceylanicum	Nematoda	Metazoa	0	0	0	0	0	0	0	0	0	0	0	0	0	0	0	0	0	0	0	0	0	0	0	0	0	0	0	0	0	0	0	0	0	0	0	0	0	0	0	0	1	0	0	0	0
A0A2A6BQG9	UP000005239	Pristionchus pacificus	Nematoda	Metazoa	0	0	0	0	0	0	0	0	0	0	0	0	0	0	0	0	0	0	0	0	0	0	0	0	0	0	0	0	0	0	0	0	0	0	0	0	0	0	0	0	0	0	0	0	0
A0AA39HUE5	UP001175271	Steinernema hermaphroditum	Nematoda	Metazoa	0	0	0	0	0	0	0	0	0	0	0	0	0	0	0	0	0	0	0	0	0	0	0	0	0	0	0	0	0	0	0	0	0	0	0	0	0	0	0	0	1	0	0	0	0
T1JX36	UP000015104	Tetranychus urticae	Arthropoda	Metazoa	0	0	0	0	0	0	0	0	0	0	0	0	0	0	0	0	0	0	0	0	0	0	0	0	0	0	0	0	0	0	0	0	0	0	0	0	0	0	0	0	1	0	0	0	0
A0A2A2LPW8	UP000218231	Diploscapter pachys	Nematoda	Metazoa	0	0	0	0	0	0	0	0	0	0	0	0	0	0	0	0	0	0	0	0	0	0	0	0	0	0	0	0	0	0	0	0	0	0	0	0	0	0	0	0	0	0	0	0	0
A0A820GVK3	UP000663884	Rotaria sp. Silwood2	Rotifera	Metazoa	0	0	0	0	0	0	0	0	0	0	0	0	0	0	0	0	0	0	0	0	0	0	0	0	0	0	0	0	0	0	0	0	0	0	0	0	0	0	0	0	0	0	0	0	0
A0AA39GN60	UP001175271	Steinernema hermaphroditum	Nematoda	Metazoa	0	0	0	0	0	0	0	0	0	0	0	0	0	0	0	0	0	0	0	0	0	0	0	0	0	0	0	0	0	0	0	0	0	0	0	0	0	0	0	0	1	0	0	0	0
A0AA36GI98	UP001176961	Cylicocyclus nassatus	Nematoda	Metazoa	0	0	0	0	0	0	0	0	0	0	0	0	0	0	0	0	0	0	0	0	0	0	0	0	0	0	0	0	0	0	0	0	0	0	0	0	0	0	0	0	0	0	0	0	0
A0A8S1ENJ1	UP000494206	Caenorhabditis bovis	Nematoda	Metazoa	0	0	0	0	0	0	0	0	0	0	0	0	0	0	0	0	0	0	0	0	0	0	0	0	0	0	0	0	0	0	0	0	0	0	0	0	0	0	0	0	1	0	0	0	0
T1JX37	UP000015104	Tetranychus urticae	Arthropoda	Metazoa	0	0	0	0	0	0	0	0	0	0	0	0	0	0	0	0	0	0	0	0	0	0	0	0	0	0	0	0	0	0	0	0	0	0	0	0	0	0	0	0	1	0	0	0	0
A0A813XE72	UP000663828	Adineta ricciae	Rotifera	Metazoa	0	0	0	0	0	0	0	0	0	0	0	0	0	0	0	0	0	0	0	0	0	0	0	0	0	0	0	0	0	0	0	0	0	0	0	0	0	0	0	0	0	0	0	0	0
A0AA39IN99	UP001175271	Steinernema hermaphroditum	Nematoda	Metazoa	0	0	0	0	0	0	0	0	0	0	0	0	0	0	0	0	0	0	0	0	0	0	0	0	0	0	0	0	0	0	0	0	0	0	0	0	0	0	0	0	1	0	0	0	0
A0A267E1T3	UP000215902	Macrostomum lignano	Platyhelminthes	Metazoa	0	0	0	0	0	0	0	0	0	0	0	0	0	0	0	0	0	0	0	0	0	0	0	0	0	0	0	0	0	0	0	0	0	0	0	0	0	0	0	0	0	0	0	0	0
A0AA36GIX6	UP001176961	Cylicocyclus nassatus	Nematoda	Metazoa	0	0	0	0	0	0	0	0	0	0	0	0	0	0	0	0	0	0	0	0	0	0	0	0	0	0	0	0	0	0	0	0	0	0	0	0	0	0	0	0	0	0	0	0	0
A0A9P1I566	UP001152747	Caenorhabditis angaria	Nematoda	Metazoa	0	0	0	0	0	0	0	0	0	0	0	0	0	0	0	0	0	0	0	0	0	0	0	0	0	0	0	0	0	0	0	0	0	0	0	0	0	0	0	0	1	0	0	0	0
A0AA39LZW9	UP001175271	Steinernema hermaphroditum	Nematoda	Metazoa	0	0	0	0	0	0	0	0	0	0	0	0	0	0	0	0	0	0	0	0	0	0	0	0	0	0	0	0	0	0	0	0	0	0	0	0	0	0	0	0	1	0	0	0	0
T1JX38	UP000015104	Tetranychus urticae	Arthropoda	Metazoa	0	0	0	0	0	0	0	0	0	0	0	0	0	0	0	0	0	0	0	0	0	0	0	0	0	0	0	0	0	0	0	0	0	0	0	0	0	0	0	0	1	0	0	0	0
A0A814FZQ0	UP000663829	Didymodactylos carnosus	Rotifera	Metazoa	0	0	0	0	0	0	0	0	0	0	0	0	0	0	0	0	0	0	0	0	0	0	0	0	0	0	0	0	0	0	0	0	0	0	0	0	0	0	0	0	0	0	0	0	0
A0A813VCJ4	UP000663828	Adineta ricciae	Rotifera	Metazoa	0	0	0	0	0	0	0	0	0	0	0	0	0	0	0	0	0	0	0	0	0	0	0	0	0	0	0	0	0	0	0	0	0	0	0	0	0	0	0	0	0	0	0	0	0
A0AA36GI64	UP001176961	Cylicocyclus nassatus	Nematoda	Metazoa	0	0	0	0	0	0	0	0	0	0	0	0	0	0	0	0	0	0	0	0	0	0	0	0	0	0	0	0	0	0	0	0	0	0	0	0	0	0	0	0	0	0	0	0	0
A0A820TN38	UP000663866	Rotaria magnacalcarata	Rotifera	Metazoa	0	0	0	0	0	0	0	0	0	0	0	0	0	0	0	0	0	0	0	0	0	0	0	0	0	0	0	0	0	0	0	0	0	0	0	0	0	0	0	0	0	0	0	0	0
A0A2A6CBZ2	UP000005239	Pristionchus pacificus	Nematoda	Metazoa	0	0	0	0	0	0	0	0	0	0	0	0	0	0	0	0	0	0	0	0	0	0	0	0	0	0	0	0	0	0	0	0	0	0	0	0	0	0	0	0	0	0	0	0	0
A0A8S1BX87	UP000494165	Cloeon dipterum	Arthropoda	Metazoa	0	0	0	0	0	0	0	0	0	0	0	0	0	0	0	0	0	0	0	0	0	0	0	0	0	0	0	0	0	0	0	0	0	0	0	0	0	0	0	0	1	0	0	0	0
A0A8S1EL29	UP000494206	Caenorhabditis bovis	Nematoda	Metazoa	0	0	0	0	0	0	0	0	0	0	0	0	0	0	0	0	0	0	0	0	0	0	0	0	0	0	0	0	0	0	0	0	0	0	0	0	0	0	0	0	0	0	0	0	0
A0A922HNG5	UP000790347	Dermatophagoides farinae	Arthropoda	Metazoa	0	0	0	0	0	0	0	0	0	0	0	0	0	0	0	0	0	0	0	0	0	0	0	0	0	0	0	0	0	0	0	0	0	0	0	0	0	0	0	0	0	0	0	0	0
A0A1D1V494	UP000186922	Ramazzottius varieornatus	Tardigrada	Metazoa	0	0	0	0	0	0	0	0	0	0	0	0	0	0	0	0	0	0	0	0	0	0	0	0	0	0	0	0	0	0	0	0	0	0	0	0	0	0	0	0	0	0	0	0	0
A0A820W9V8	UP000663884	Rotaria sp. Silwood2	Rotifera	Metazoa	0	0	0	0	0	0	0	0	0	0	0	0	0	0	0	0	0	0	0	0	0	0	0	0	0	0	0	0	0	0	0	0	0	0	0	0	0	0	0	0	0	0	0	0	0
A0AA39GV21	UP001175271	Steinernema hermaphroditum	Nematoda	Metazoa	0	0	0	0	0	0	0	0	0	0	0	0	0	0	0	0	0	0	0	0	0	0	0	0	0	0	0	0	0	0	0	0	0	0	0	0	0	0	0	0	1	0	0	0	0
A0A2A2LX10	UP000218231	Diploscapter pachys	Nematoda	Metazoa	0	0	0	0	0	0	0	0	0	0	0	0	0	0	0	0	0	0	0	0	0	0	0	0	0	0	0	0	0	0	0	0	0	0	0	0	0	0	0	0	0	0	0	0	0
A0AA39I343	UP001175271	Steinernema hermaphroditum	Nematoda	Metazoa	0	0	0	0	0	0	0	0	0	0	0	0	0	0	0	0	0	0	0	0	0	0	0	0	0	0	0	0	0	0	0	0	0	0	0	0	0	0	0	0	1	0	0	0	0
A0A7R9GJR4	UP000678499	Notodromas monacha	Arthropoda	Metazoa	0	0	0	0	0	0	0	0	0	0	0	0	0	0	0	0	0	0	0	0	0	0	0	0	0	0	0	0	0	0	0	0	0	0	0	0	0	0	0	0	0	0	0	0	0
A0AAF3FBL0	UP000887575	Mesorhabditis belari	Nematoda	Metazoa	0	0	0	0	0	0	0	0	0	0	0	0	0	0	0	0	0	0	0	0	0	0	0	0	0	0	0	0	0	0	0	0	0	0	0	0	0	0	0	0	0	0	0	0	0
A0A2G5SE76	UP000230233	Caenorhabditis nigoni	Nematoda	Metazoa	0	0	0	0	0	0	0	0	0	0	0	0	0	0	0	0	0	0	0	0	0	0	0	0	0	0	0	0	0	0	0	0	0	0	0	0	0	0	0	0	1	0	0	0	0
A0A9P1IQK7	UP001152747	Caenorhabditis angaria	Nematoda	Metazoa	0	0	0	0	0	0	0	0	0	0	0	0	0	0	0	0	0	0	0	0	0	0	0	0	0	0	0	0	0	0	0	0	0	0	0	0	0	0	0	0	0	0	0	0	0
A0A2A2LWR5	UP000218231	Diploscapter pachys	Nematoda	Metazoa	0	0	0	0	0	0	0	0	0	0	0	0	0	0	0	0	0	0	0	0	0	0	0	0	0	0	0	0	0	0	0	0	0	0	0	0	0	0	0	0	0	0	0	0	0
A0A8R1HLI5	UP000005237	Caenorhabditis japonica	Nematoda	Metazoa	0	0	0	0	0	0	0	0	0	0	0	0	0	0	0	0	0	0	0	0	0	0	0	0	0	0	0	0	0	0	0	0	0	0	0	0	0	0	0	0	0	0	0	0	0
A0AA39IPE6	UP001175271	Steinernema hermaphroditum	Nematoda	Metazoa	0	0	0	0	0	0	0	0	0	0	0	0	0	0	0	0	0	0	0	0	0	0	0	0	0	0	0	0	0	0	0	0	0	0	0	0	0	0	0	0	1	0	0	0	0
A0A8S1EFS5	UP000494206	Caenorhabditis bovis	Nematoda	Metazoa	0	0	0	0	0	0	0	0	0	0	0	0	0	0	0	0	0	0	0	0	0	0	0	0	0	0	0	0	0	0	0	0	0	0	0	0	0	0	0	0	1	0	0	0	0
A0A4X2JUJ0	UP000314987	Vombatus ursinus	Chordata	Metazoa	0	0	0	0	0	0	0	0	0	0	0	0	0	0	0	0	0	0	0	0	0	0	0	0	0	0	0	0	0	0	0	0	0	0	0	0	0	0	0	0	0	0	0	0	0
A0AA39I085	UP001175271	Steinernema hermaphroditum	Nematoda	Metazoa	0	0	0	0	0	0	0	0	0	0	0	0	0	0	0	0	0	0	0	0	0	0	0	0	0	0	0	0	0	0	0	0	0	0	0	0	0	0	0	0	1	0	0	0	0
A0A016RXR3	UP000024635	Ancylostoma ceylanicum	Nematoda	Metazoa	0	0	0	0	0	0	0	0	0	0	0	0	0	0	0	0	0	0	0	0	0	0	0	0	0	0	0	0	0	0	0	0	0	0	0	0	0	0	0	0	1	0	0	0	0
A0AA39HS80	UP001175271	Steinernema hermaphroditum	Nematoda	Metazoa	0	0	0	0	0	0	0	0	0	0	0	0	0	0	0	0	0	0	0	0	0	0	0	0	0	0	0	0	0	0	0	0	0	0	0	0	0	0	0	0	1	0	0	0	0
A0A2G5TME2	UP000230233	Caenorhabditis nigoni	Nematoda	Metazoa	0	0	0	0	0	0	0	0	0	0	0	0	0	0	0	0	0	0	0	0	0	0	0	0	0	0	0	0	0	0	0	0	0	0	0	0	0	0	0	0	0	0	0	0	0
A0A6G0T3Z4	UP000475862	Aphis glycines	Arthropoda	Metazoa	0	0	0	0	0	0	0	0	0	0	0	0	0	0	0	0	0	0	0	0	0	0	0	0	0	0	0	0	0	0	0	0	0	0	0	0	0	0	0	0	1	0	0	0	0
A0A2A6BYE5	UP000005239	Pristionchus pacificus	Nematoda	Metazoa	0	0	0	0	0	0	0	0	0	0	0	0	0	0	0	0	0	0	0	0	0	0	0	0	0	0	0	0	0	0	0	0	0	0	0	0	0	0	0	0	0	0	0	0	0
A0A2G5UV33	UP000230233	Caenorhabditis nigoni	Nematoda	Metazoa	0	0	0	0	0	0	0	0	0	0	0	0	0	0	0	0	0	0	0	0	0	0	0	0	0	0	0	0	0	0	0	0	0	0	0	0	0	0	0	0	1	0	0	0	0
A0AA39HJ50	UP001175271	Steinernema hermaphroditum	Nematoda	Metazoa	0	0	0	0	0	0	0	0	0	0	0	0	0	0	0	0	0	0	0	0	0	0	0	0	0	0	0	0	0	0	0	0	0	0	0	0	0	0	0	0	1	0	0	0	0
A0A814M2E1	UP000663832	Adineta steineri	Rotifera	Metazoa	0	0	0	0	0	0	0	0	0	0	0	0	0	0	0	0	0	0	0	0	0	0	0	0	0	0	0	0	0	0	0	0	0	0	0	0	0	0	0	0	0	0	0	0	0
G5EEH0	UP000001940	Caenorhabditis elegans	Nematoda	Metazoa	0	0	0	0	0	0	0	0	0	0	0	0	0	0	0	0	0	0	0	0	0	0	0	0	0	0	0	0	0	0	0	0	0	0	0	0	0	0	0	0	0	0	0	0	0
A0A2G5SLK1	UP000230233	Caenorhabditis nigoni	Nematoda	Metazoa	0	0	0	0	0	0	0	0	0	0	0	0	0	0	0	0	0	0	0	0	0	0	0	0	0	0	0	0	0	0	0	0	0	0	0	0	0	0	0	0	1	0	0	0	0
A0A3P6UB64	UP000277928	Litomosoides sigmodontis	Nematoda	Metazoa	0	0	0	0	0	0	0	0	0	0	0	0	0	0	0	0	0	0	0	0	0	0	0	0	0	0	0	0	0	0	0	0	0	0	0	0	0	0	0	0	1	0	0	0	0
A0AA39LQE0	UP001175271	Steinernema hermaphroditum	Nematoda	Metazoa	0	0	0	0	0	0	0	0	0	0	0	0	0	0	0	0	0	0	0	0	0	0	0	0	0	0	0	0	0	0	0	0	0	0	0	0	0	0	0	0	1	0	0	0	0
A0A819S7T9	UP000663884	Rotaria sp. Silwood2	Rotifera	Metazoa	0	0	0	0	0	0	0	0	0	0	0	0	0	0	0	0	0	0	0	0	0	0	0	0	0	0	0	0	0	0	0	0	0	0	0	0	0	0	0	0	0	0	0	0	0
A0AAF3J9E5	UP000887575	Mesorhabditis belari	Nematoda	Metazoa	0	0	0	0	0	0	0	0	0	0	0	0	0	0	0	0	0	0	0	0	0	0	0	0	0	0	0	0	0	0	0	0	0	0	0	0	0	0	0	0	0	0	0	0	0
A0A8S1F3C1	UP000494206	Caenorhabditis bovis	Nematoda	Metazoa	0	0	0	0	0	0	0	0	0	0	0	0	0	0	0	0	0	0	0	0	0	0	0	0	0	0	0	0	0	0	0	0	0	0	0	0	0	0	0	0	0	0	0	0	0
A0A8S1F1Z2	UP000494206	Caenorhabditis bovis	Nematoda	Metazoa	0	0	0	0	0	0	0	0	0	0	0	0	0	0	0	0	0	0	0	0	0	0	0	0	0	0	0	0	0	0	0	0	0	0	0	0	0	0	0	0	0	0	0	0	0
E3N500	UP000008281	Caenorhabditis remanei	Nematoda	Metazoa	0	0	0	0	0	0	0	0	0	0	0	0	0	0	0	0	0	0	0	0	0	0	0	0	0	0	0	0	0	0	0	0	0	0	0	0	0	0	0	0	1	0	0	0	0
A0AA39HJY3	UP001175271	Steinernema hermaphroditum	Nematoda	Metazoa	0	0	0	0	0	0	0	0	0	0	0	0	0	0	0	0	0	0	0	0	0	0	0	0	0	0	0	0	0	0	0	0	0	0	0	0	0	0	0	0	1	0	0	0	0
A0A016STW8	UP000024635	Ancylostoma ceylanicum	Nematoda	Metazoa	0	0	0	0	0	0	0	0	0	0	0	0	0	0	0	0	0	0	0	0	0	0	0	0	0	0	0	0	0	0	0	0	0	0	0	0	0	0	0	0	0	0	0	0	0
A0A9P1N4V7	UP001152747	Caenorhabditis angaria	Nematoda	Metazoa	0	0	0	0	0	0	0	0	0	0	0	0	0	0	0	0	0	0	0	0	0	0	0	0	0	0	0	0	0	0	0	0	0	0	0	0	0	0	0	0	0	0	0	0	0
A0A3P6TAA9	UP000277928	Litomosoides sigmodontis	Nematoda	Metazoa	0	0	0	0	0	0	0	0	0	0	0	0	0	0	0	0	0	0	0	0	0	0	0	0	0	0	0	0	0	0	0	0	0	0	0	0	0	0	0	0	1	0	0	0	0
A0AA36CZF7	UP001177023	Mesorhabditis spiculigera	Nematoda	Metazoa	0	0	0	0	0	0	0	0	0	0	0	0	0	0	0	0	0	0	0	0	0	0	0	0	0	0	0	0	0	0	0	0	0	0	0	0	0	0	0	0	0	0	0	0	0
A0A1D1UB95	UP000186922	Ramazzottius varieornatus	Tardigrada	Metazoa	0	0	0	0	0	0	0	0	0	0	0	0	0	0	0	0	0	0	0	0	0	0	0	0	0	0	0	0	0	0	0	0	0	0	0	0	0	0	0	0	0	0	0	0	0
A0A820F1D1	UP000663884	Rotaria sp. Silwood2	Rotifera	Metazoa	0	0	0	0	0	0	0	0	0	0	0	0	0	0	0	0	0	0	0	0	0	0	0	0	0	0	0	0	0	0	0	0	0	0	0	0	0	0	0	0	0	0	0	0	0
A0A1D1ULB2	UP000186922	Ramazzottius varieornatus	Tardigrada	Metazoa	0	0	0	0	0	0	0	0	0	0	0	0	0	0	0	0	0	0	0	0	0	0	0	0	0	0	0	0	0	0	0	0	0	0	0	0	0	0	0	0	0	0	0	0	0
A0AA39LUH7	UP001175271	Steinernema hermaphroditum	Nematoda	Metazoa	0	0	0	0	0	0	0	0	0	0	0	0	0	0	0	0	0	0	0	0	0	0	0	0	0	0	0	0	0	0	0	0	0	0	0	0	0	0	0	0	1	0	0	0	0
G0P530	UP000008068	Caenorhabditis brenneri	Nematoda	Metazoa	0	0	0	0	0	0	0	0	0	0	0	0	0	0	0	0	0	0	0	0	0	0	0	0	0	0	0	0	0	0	0	0	0	0	0	0	0	0	0	0	1	0	0	0	0
A0A2A2JGK8	UP000218231	Diploscapter pachys	Nematoda	Metazoa	0	0	0	0	0	0	0	0	0	0	0	0	0	0	0	0	0	0	0	0	0	0	0	0	0	0	0	0	0	0	0	0	0	0	0	0	0	0	0	0	1	0	0	0	0
A0A2G5SDT4	UP000230233	Caenorhabditis nigoni	Nematoda	Metazoa	0	0	0	0	0	0	0	0	0	0	0	0	0	0	0	0	0	0	0	0	0	0	0	0	0	0	0	0	0	0	0	0	0	0	0	0	0	0	0	0	1	0	0	0	0
A0AAF3FA30	UP000887575	Mesorhabditis belari	Nematoda	Metazoa	0	0	0	0	0	0	0	0	0	0	0	0	0	0	0	0	0	0	0	0	0	0	0	0	0	0	0	0	0	0	0	0	0	0	0	0	0	0	0	0	0	0	0	0	0
A0A8R1U430	UP000024404	Onchocerca volvulus	Nematoda	Metazoa	0	0	0	0	0	0	0	0	0	0	0	0	0	0	0	0	0	0	0	0	0	0	0	0	0	0	0	0	0	0	0	0	0	0	0	0	0	0	0	0	0	0	0	0	0
A0A915AA38	UP000887569	Parascaris univalens	Nematoda	Metazoa	0	0	0	0	0	0	0	0	0	0	0	0	0	0	0	0	0	0	0	0	0	0	0	0	0	0	0	0	0	0	0	0	0	0	0	0	0	0	0	0	1	0	0	0	0
A0AA39LMX8	UP001175271	Steinernema hermaphroditum	Nematoda	Metazoa	0	0	0	0	0	0	0	0	0	0	0	0	0	0	0	0	0	0	0	0	0	0	0	0	0	0	0	0	0	0	0	0	0	0	0	0	0	0	0	0	1	0	0	0	0
A0A8L7SN28	UP000006672	Brugia malayi	Nematoda	Metazoa	0	0	0	0	0	0	0	0	0	0	0	0	0	0	0	0	0	0	0	0	0	0	0	0	0	0	0	0	0	0	0	0	0	0	0	0	0	0	0	0	0	0	0	0	0
A0A915ADT8	UP000887569	Parascaris univalens	Nematoda	Metazoa	0	0	0	0	0	0	0	0	0	0	0	0	0	0	0	0	0	0	0	0	0	0	0	0	0	0	0	0	0	0	0	0	0	0	0	0	0	0	0	0	1	0	0	0	0
A0A915ABS9	UP000887569	Parascaris univalens	Nematoda	Metazoa	0	0	0	0	0	0	0	0	0	0	0	0	0	0	0	0	0	0	0	0	0	0	0	0	0	0	0	0	0	0	0	0	0	0	0	0	0	0	0	0	1	0	0	0	0
A0AA36GQ13	UP001176961	Cylicocyclus nassatus	Nematoda	Metazoa	0	0	0	0	0	0	0	0	0	0	0	0	0	0	0	0	0	0	0	0	0	0	0	0	0	0	0	0	0	0	0	0	0	0	0	0	0	0	0	0	1	0	0	0	0
A0A8C8SXA7	UP000694393	Pelusios castaneus	Chordata	Metazoa	0	0	0	0	0	0	0	0	0	0	0	0	0	0	0	0	0	0	0	0	0	0	0	0	0	0	0	0	0	0	0	0	0	0	0	0	0	0	0	0	0	0	0	0	0
A0A9P1AWU7	UP001153352	Caenorhabditis sp. 36 PRJEB53466	Nematoda	Metazoa	0	0	0	0	0	0	0	0	0	0	0	0	0	0	0	0	0	0	0	0	0	0	0	0	0	0	0	0	0	0	0	0	0	0	0	0	0	0	0	0	1	0	0	0	0
A0A7R9Q2W3	UP000759131	Medioppia subpectinata	Arthropoda	Metazoa	0	0	0	0	0	0	0	0	0	0	0	0	0	0	0	0	0	0	0	0	0	0	0	0	0	0	0	0	0	0	0	0	0	0	0	0	0	0	0	0	0	0	0	0	0
A0A498SCK7	UP000276991	Acanthocheilonema viteae	Nematoda	Metazoa	0	0	0	0	0	0	0	0	0	0	0	0	0	0	0	0	0	0	0	0	0	0	0	0	0	0	0	0	0	0	0	0	0	0	0	0	0	0	0	0	1	0	0	0	0
A0A9D3PV58	UP001046870	Megalops atlanticus	Chordata	Metazoa	0	0	0	0	0	0	0	0	0	0	0	0	0	0	0	0	0	0	0	0	0	0	0	0	0	0	0	0	0	0	0	0	0	0	0	0	0	0	0	0	0	0	0	0	0
E3LKN8	UP000008281	Caenorhabditis remanei	Nematoda	Metazoa	0	0	0	0	0	0	0	0	0	0	0	0	0	0	0	0	0	0	0	0	0	0	0	0	0	0	0	0	0	0	0	0	0	0	0	0	0	0	0	0	1	0	0	0	0
A0AAF3ED63	UP000887575	Mesorhabditis belari	Nematoda	Metazoa	0	0	0	0	0	0	0	0	0	0	0	0	0	0	0	0	0	0	0	0	0	0	0	0	0	0	0	0	0	1	0	0	0	0	0	0	0	0	0	0	0	0	0	0	0
A0AA36M3T1	UP001176961	Cylicocyclus nassatus	Nematoda	Metazoa	0	0	0	0	0	0	0	0	0	0	0	0	0	0	0	0	0	0	0	0	0	0	0	0	0	0	0	0	0	0	0	0	0	0	0	0	0	0	0	0	1	0	0	0	0
A0A8S1F273	UP000494206	Caenorhabditis bovis	Nematoda	Metazoa	0	0	0	0	0	0	0	0	0	0	0	0	0	0	0	0	0	0	0	0	0	0	0	0	0	0	0	0	0	0	0	0	0	0	0	0	0	0	0	0	0	0	0	0	0
A0A9P1F601	UP001153352	Caenorhabditis sp. 36 PRJEB53466	Nematoda	Metazoa	0	0	0	0	0	0	0	0	0	0	0	0	0	0	0	0	0	0	0	0	0	0	0	0	0	0	0	0	0	0	0	0	0	0	0	0	0	0	0	0	0	0	0	0	0
A0A915PH56	UP000887581	Setaria digitata	Nematoda	Metazoa	0	0	0	0	0	0	0	0	0	0	0	0	0	0	0	0	0	0	0	0	0	0	0	0	0	0	0	0	0	0	0	0	0	0	0	0	0	0	0	0	1	0	0	0	0
A0AA39HM11	UP001175271	Steinernema hermaphroditum	Nematoda	Metazoa	0	0	0	0	0	0	0	0	0	0	0	0	0	0	0	0	0	0	0	0	0	0	0	0	0	0	0	0	0	0	0	0	0	0	0	0	0	0	0	0	1	0	0	0	0
A0AA39M9K7	UP001175271	Steinernema hermaphroditum	Nematoda	Metazoa	0	0	0	0	0	0	0	0	0	0	0	0	0	0	0	0	0	0	0	0	0	0	0	0	0	0	0	0	0	0	0	0	0	0	0	0	0	0	0	0	1	0	0	0	0
A0A8R1XN14	UP000024404	Onchocerca volvulus	Nematoda	Metazoa	0	0	0	0	0	0	0	0	0	0	0	0	0	0	0	0	0	0	0	0	0	0	0	0	0	0	0	0	0	0	0	0	0	0	0	0	0	0	0	0	1	0	0	0	0
A0A9J6BRZ5	UP001107558	Polypedilum vanderplanki	Arthropoda	Metazoa	0	0	0	0	0	0	0	0	0	0	0	0	0	0	0	0	0	0	0	0	0	0	0	0	0	0	0	0	0	0	0	0	0	0	0	0	0	0	0	0	0	0	0	0	0
A0AA39HKS2	UP001175271	Steinernema hermaphroditum	Nematoda	Metazoa	0	0	0	0	0	0	0	0	0	0	0	0	0	0	0	0	0	0	0	0	0	0	0	0	0	0	0	0	0	0	0	0	0	0	0	0	0	0	0	0	1	0	0	0	0
A0AA39LR80	UP001175271	Steinernema hermaphroditum	Nematoda	Metazoa	0	0	0	0	0	0	0	0	0	0	0	0	0	0	0	0	0	0	0	0	0	0	0	0	0	0	0	0	0	0	0	0	0	0	0	0	0	0	0	0	1	0	0	0	0
A0A2G5TD83	UP000230233	Caenorhabditis nigoni	Nematoda	Metazoa	0	0	0	0	0	0	0	0	0	0	0	0	0	0	0	0	0	0	0	0	0	0	0	0	0	0	0	0	0	0	0	0	0	0	0	0	0	0	0	0	1	0	0	0	0
A0A814WFD1	UP000663829	Didymodactylos carnosus	Rotifera	Metazoa	0	0	0	0	0	0	0	0	0	0	0	0	0	0	0	0	0	0	0	0	0	0	0	0	0	0	0	0	0	0	0	0	0	0	0	0	0	0	0	0	0	0	0	0	0
A0A5F5Y565	UP000011712	Felis catus	Chordata	Metazoa	0	0	0	0	0	0	0	0	0	0	0	0	0	0	0	0	0	0	0	0	0	0	0	0	0	0	0	0	0	0	0	0	0	0	0	0	0	0	0	0	0	0	0	0	0
A0A819PV17	UP000663884	Rotaria sp. Silwood2	Rotifera	Metazoa	0	0	0	0	0	0	0	0	0	0	0	0	0	0	0	0	0	0	0	0	0	0	0	0	0	0	0	0	0	0	0	0	0	0	0	0	0	0	0	0	1	0	0	0	0
A0A8S1CKQ5	UP000494165	Cloeon dipterum	Arthropoda	Metazoa	0	0	0	0	0	0	0	0	0	0	0	0	0	0	0	0	0	0	0	0	0	0	0	0	0	0	0	0	0	0	0	0	0	0	0	0	0	0	0	0	0	0	0	0	0
A0A6G0T9D0	UP000475862	Aphis glycines	Arthropoda	Metazoa	0	0	0	0	0	0	0	0	0	0	0	0	0	0	0	0	0	0	0	0	0	0	0	0	0	0	0	0	0	0	0	0	0	0	0	0	0	0	0	0	0	0	0	0	0
G0NIE2	UP000008068	Caenorhabditis brenneri	Nematoda	Metazoa	0	0	0	0	0	0	0	0	0	0	0	0	0	0	0	0	0	0	0	0	0	0	0	0	0	0	0	0	0	0	0	0	0	0	0	0	0	0	0	0	0	0	0	0	0
A0AA39I8D5	UP001175271	Steinernema hermaphroditum	Nematoda	Metazoa	0	0	0	0	0	0	0	0	0	0	0	0	0	0	0	0	0	0	0	0	0	0	0	0	0	0	0	0	0	0	0	0	0	0	0	0	0	0	0	0	1	0	0	0	0
A0AA39H4P7	UP001175271	Steinernema hermaphroditum	Nematoda	Metazoa	0	0	0	0	0	0	0	0	0	0	0	0	0	0	0	0	0	0	0	0	0	0	0	0	0	0	0	0	0	0	0	0	0	0	0	0	0	0	0	0	1	0	0	0	0
A0A9P1MN06	UP001154013	Auanema sp. JU1783	Nematoda	Metazoa	0	0	0	0	0	0	0	0	0	0	0	0	0	0	0	0	0	0	0	0	0	0	0	0	0	0	0	0	0	0	0	0	0	0	0	0	0	0	0	0	0	0	0	0	0
A0A016SXH8	UP000024635	Ancylostoma ceylanicum	Nematoda	Metazoa	0	0	0	0	0	0	0	0	0	0	0	0	0	0	0	0	0	0	0	0	0	0	0	0	0	0	0	0	0	0	0	0	0	0	0	0	0	0	0	0	0	0	0	0	0
A0A8J2Q7V1	UP000746747	Cercopithifilaria johnstoni	Nematoda	Metazoa	0	0	0	0	0	0	0	0	0	0	0	0	0	0	0	0	0	0	0	0	0	0	0	0	0	0	0	0	0	0	0	0	0	0	0	0	0	0	0	0	0	0	0	0	0
A0A3P6V9P2	UP000277928	Litomosoides sigmodontis	Nematoda	Metazoa	0	0	0	0	0	0	0	0	0	0	0	0	0	0	0	0	0	0	0	0	0	0	0	0	0	0	0	0	0	0	0	0	0	0	0	0	0	0	0	0	0	0	0	0	0
A0AA39H5Q3	UP001175271	Steinernema hermaphroditum	Nematoda	Metazoa	0	0	0	0	0	0	0	0	0	0	0	0	0	0	0	0	0	0	0	0	0	0	0	0	0	0	0	0	0	0	0	0	0	0	0	0	0	0	0	0	1	0	0	0	0
A0A9P0HSW9	UP001152798	Nezara viridula	Arthropoda	Metazoa	0	0	0	0	0	0	0	0	0	0	0	0	0	0	0	0	0	0	0	0	0	0	0	0	0	0	0	0	0	0	0	0	0	0	0	0	0	0	0	0	0	0	0	0	0
A0A2A2JS55	UP000218231	Diploscapter pachys	Nematoda	Metazoa	0	0	0	0	0	0	0	0	0	0	0	0	0	0	0	0	0	0	0	0	0	0	0	0	0	0	0	0	0	0	0	0	0	0	0	0	0	0	0	0	0	0	0	0	0
A0AA36CY13	UP001177023	Mesorhabditis spiculigera	Nematoda	Metazoa	0	0	0	0	0	0	0	0	0	0	0	0	0	0	0	0	0	0	0	0	0	0	0	0	0	0	0	0	0	0	0	0	0	0	0	0	0	0	0	0	0	0	0	0	0
A0A2A2M1L8	UP000218231	Diploscapter pachys	Nematoda	Metazoa	0	0	0	0	0	0	0	0	0	0	0	0	0	0	0	0	0	0	0	0	0	0	0	0	0	0	0	0	0	0	0	0	0	0	0	0	0	0	0	0	0	0	0	0	0
A0AA39HQD1	UP001175271	Steinernema hermaphroditum	Nematoda	Metazoa	0	0	0	0	0	0	0	0	0	0	0	0	0	0	0	0	0	0	0	0	0	0	0	0	0	0	0	0	0	0	0	0	0	0	0	0	0	0	0	0	1	0	0	0	0
A0A820L9M2	UP000663884	Rotaria sp. Silwood2	Rotifera	Metazoa	0	0	0	0	0	0	0	0	0	0	0	0	0	0	0	0	0	0	0	0	0	0	0	0	0	0	0	0	0	0	0	0	0	0	0	0	0	0	0	0	0	0	0	0	0
A0AA39M724	UP001175271	Steinernema hermaphroditum	Nematoda	Metazoa	0	0	0	0	0	0	0	0	0	0	0	0	0	0	0	0	0	0	0	0	0	0	0	0	0	0	0	0	0	0	0	0	0	0	0	0	0	0	0	0	1	0	0	0	0
A0AA36FR13	UP001177023	Mesorhabditis spiculigera	Nematoda	Metazoa	0	0	0	0	0	0	0	0	0	0	0	0	0	0	0	0	0	0	0	0	0	0	0	0	0	0	0	0	0	0	0	0	0	0	0	0	0	0	0	0	0	0	0	0	0
A0A443S4V9	UP000288716	Leptotrombidium deliense	Arthropoda	Metazoa	0	0	0	0	0	0	0	0	0	0	0	0	0	0	0	0	0	0	0	0	0	0	0	0	0	0	0	0	0	0	0	0	0	0	0	0	0	0	0	0	0	0	0	0	0
A0A814SQ48	UP000663832	Adineta steineri	Rotifera	Metazoa	0	0	0	0	0	0	0	0	0	0	0	0	0	0	0	0	0	0	0	0	0	0	0	0	0	0	0	0	0	0	0	0	0	0	0	0	0	0	0	0	0	0	0	0	0
A0A9P1F1M7	UP001153352	Caenorhabditis sp. 36 PRJEB53466	Nematoda	Metazoa	0	0	0	0	0	0	0	0	0	0	0	0	0	0	0	0	0	0	0	0	0	0	0	0	0	0	0	0	0	0	0	0	0	0	0	0	0	0	0	0	0	0	0	0	0
E3MY79	UP000008281	Caenorhabditis remanei	Nematoda	Metazoa	0	0	0	0	0	0	0	0	0	0	0	0	0	0	0	0	0	0	0	0	0	0	0	0	0	0	0	0	0	0	0	0	0	0	0	0	0	0	0	0	1	0	0	0	0
A0A821H561	UP000663873	Rotaria socialis	Rotifera	Metazoa	0	0	0	0	0	0	0	0	0	0	0	0	0	0	0	0	0	0	0	0	0	0	0	0	0	0	0	0	0	0	0	0	0	0	0	0	0	0	0	0	0	0	0	0	0
A0A9P1IC60	UP001152747	Caenorhabditis angaria	Nematoda	Metazoa	0	0	0	0	0	0	0	0	0	0	0	0	0	0	0	0	0	0	0	0	0	0	0	0	0	0	0	0	0	0	0	0	0	0	0	0	0	0	0	0	1	0	0	0	0
A0AAF3EJ59	UP000887575	Mesorhabditis belari	Nematoda	Metazoa	0	0	0	0	0	0	0	0	0	0	0	0	0	0	0	0	0	0	0	0	0	0	0	0	0	0	0	0	0	0	0	0	0	0	0	0	0	0	0	0	0	0	0	0	0
A0A2A2L5T6	UP000218231	Diploscapter pachys	Nematoda	Metazoa	0	0	0	0	0	0	0	0	0	0	0	0	0	0	0	0	0	0	0	0	0	0	0	0	0	0	0	0	0	0	0	0	0	0	0	0	0	0	0	0	1	0	0	0	0
A0A7R9ML94	UP000728032	Oppiella nova	Arthropoda	Metazoa	0	0	0	0	0	0	0	0	0	0	0	0	0	0	0	0	0	0	0	0	0	0	0	0	0	0	0	0	0	0	0	0	0	0	0	0	0	0	0	0	0	0	0	0	0
A0A9P1MSB2	UP001152747	Caenorhabditis angaria	Nematoda	Metazoa	0	0	0	0	0	0	0	0	0	0	0	0	0	0	0	0	0	0	0	0	0	0	0	0	0	0	0	0	0	0	0	0	0	0	0	0	0	0	0	0	1	0	0	0	0
G0NBB7	UP000008068	Caenorhabditis brenneri	Nematoda	Metazoa	0	0	0	0	0	0	0	0	0	0	0	0	0	0	0	0	0	0	0	0	0	0	0	0	0	0	0	0	0	0	0	0	0	0	0	0	0	0	0	0	1	0	0	0	0
A0A9P1I7N8	UP001152747	Caenorhabditis angaria	Nematoda	Metazoa	0	0	0	0	0	0	0	0	0	0	0	0	0	0	0	0	0	0	0	0	0	0	0	0	0	0	0	0	0	0	0	0	0	0	0	0	0	0	0	0	0	0	0	0	0
A0A7R9L7H5	UP000759131	Medioppia subpectinata	Arthropoda	Metazoa	0	0	0	0	0	0	0	0	0	0	0	0	0	0	0	0	0	0	0	0	0	0	0	0	0	0	0	0	0	0	0	0	0	0	0	0	0	0	0	0	0	0	0	0	0
A0AA39GV31	UP001175271	Steinernema hermaphroditum	Nematoda	Metazoa	0	0	0	0	0	0	0	0	0	0	0	0	0	0	0	0	0	0	0	0	0	0	0	0	0	0	0	0	0	0	0	0	0	0	0	0	0	0	0	0	1	0	0	0	0
A0AAF3F5E2	UP000887575	Mesorhabditis belari	Nematoda	Metazoa	0	0	0	0	0	0	0	0	0	0	0	0	0	0	0	0	0	0	0	0	0	0	0	0	0	0	0	0	0	0	0	0	0	0	0	0	0	0	0	0	1	0	0	0	0
A0A8S1F6R2	UP000494206	Caenorhabditis bovis	Nematoda	Metazoa	0	0	0	0	0	0	0	0	0	0	0	0	0	0	0	0	0	0	0	0	0	0	0	0	0	0	0	0	0	0	0	0	0	0	0	0	0	0	0	0	1	0	0	0	0
A0AAF3EJ71	UP000887575	Mesorhabditis belari	Nematoda	Metazoa	0	0	0	0	0	0	0	0	0	0	0	0	0	0	0	0	0	0	0	0	0	0	0	0	0	0	0	0	0	0	0	0	0	0	0	0	0	0	0	0	0	0	0	0	0
A0AA39HID0	UP001175271	Steinernema hermaphroditum	Nematoda	Metazoa	0	0	0	0	0	0	0	0	0	0	0	0	0	0	0	0	0	0	0	0	0	0	0	0	0	0	0	0	0	0	0	0	0	0	0	0	0	0	0	0	1	0	0	0	0
A0A815BW14	UP000663829	Didymodactylos carnosus	Rotifera	Metazoa	0	0	0	0	0	0	0	0	0	0	0	0	0	0	0	0	0	0	0	0	0	0	0	0	0	0	0	0	0	0	0	0	0	0	0	0	0	0	0	0	0	0	0	0	0
A0A8S1FGK2	UP000494206	Caenorhabditis bovis	Nematoda	Metazoa	0	0	0	0	0	0	0	0	0	0	0	0	0	0	0	0	0	0	0	0	0	0	0	0	0	0	0	0	0	0	0	0	0	0	0	0	0	0	0	0	0	0	0	0	0
A0A8S1FAZ5	UP000494206	Caenorhabditis bovis	Nematoda	Metazoa	0	0	0	0	0	0	0	0	0	0	0	0	0	0	0	0	0	0	0	0	0	0	0	0	0	0	0	0	0	0	0	0	0	0	0	0	0	0	0	0	0	0	0	0	0
A0A9P1AXD6	UP001153352	Caenorhabditis sp. 36 PRJEB53466	Nematoda	Metazoa	0	0	0	0	0	0	0	0	0	0	0	0	0	0	0	0	0	0	0	0	0	0	0	0	0	0	0	0	0	0	0	0	0	0	0	0	0	0	0	0	0	0	0	0	0
A0A8S1FFF3	UP000494206	Caenorhabditis bovis	Nematoda	Metazoa	0	0	0	0	0	0	0	0	0	0	0	0	0	0	0	0	0	0	0	0	0	0	0	0	0	0	0	0	0	0	0	0	0	0	0	0	0	0	0	0	0	0	0	0	0
A0A8S1FCR8	UP000494206	Caenorhabditis bovis	Nematoda	Metazoa	0	0	0	0	0	0	0	0	0	0	0	0	0	0	0	0	0	0	0	0	0	0	0	0	0	0	0	0	0	0	0	0	0	0	0	0	0	0	0	0	0	0	0	0	0
A0A8S1GXM6	UP000835052	Caenorhabditis auriculariae	Nematoda	Metazoa	0	0	0	0	0	0	0	0	0	0	0	0	0	0	0	0	0	0	0	0	0	0	0	0	0	0	0	0	0	0	0	0	0	0	0	0	0	0	0	0	1	0	0	0	0
A0A267E919	UP000215902	Macrostomum lignano	Platyhelminthes	Metazoa	0	0	0	0	0	0	0	0	0	0	0	0	0	0	0	0	0	0	0	0	0	0	0	0	0	0	0	0	0	0	0	0	0	0	0	0	0	0	0	0	0	0	0	0	0
A0A2A2KJH0	UP000218231	Diploscapter pachys	Nematoda	Metazoa	0	0	0	0	0	0	0	0	0	0	0	0	0	0	0	0	0	0	0	0	0	0	0	0	0	0	0	0	0	0	0	0	0	0	0	0	0	0	0	0	1	0	0	0	0
A0A915PVY4	UP000887581	Setaria digitata	Nematoda	Metazoa	0	0	0	0	0	0	0	0	0	0	0	0	0	0	0	0	0	0	0	0	0	0	0	0	0	0	0	0	0	0	0	0	0	0	0	0	0	0	0	0	1	0	0	0	0
A0A9N9S593	UP001153620	Chironomus riparius	Arthropoda	Metazoa	0	0	0	0	0	0	0	0	0	0	0	0	0	0	0	0	0	0	0	0	0	0	0	0	0	0	0	0	0	0	0	0	0	0	0	0	0	0	0	0	0	0	0	0	0
A0A2A6B2R8	UP000005239	Pristionchus pacificus	Nematoda	Metazoa	0	0	0	0	0	0	0	0	0	0	0	0	0	0	0	0	0	0	0	0	0	0	0	0	0	0	0	0	0	0	0	0	0	0	0	0	0	0	0	0	0	0	0	0	0
A0AA39M7B5	UP001175271	Steinernema hermaphroditum	Nematoda	Metazoa	0	0	0	0	0	0	0	0	0	0	0	0	0	0	0	0	0	0	0	0	0	0	0	0	0	0	0	0	0	0	0	0	0	0	0	0	0	0	0	0	1	0	0	0	0
A0A8R1DTB5	UP000005237	Caenorhabditis japonica	Nematoda	Metazoa	0	0	0	0	0	0	0	0	0	0	0	0	0	0	0	0	0	0	0	0	0	0	0	0	0	0	0	0	0	0	0	0	0	0	0	0	0	0	0	0	0	0	0	0	0
A0A2A2KUJ0	UP000218231	Diploscapter pachys	Nematoda	Metazoa	0	0	0	0	0	0	0	0	0	0	0	0	0	0	0	0	0	0	0	0	0	0	0	0	0	0	0	0	0	0	0	0	0	0	0	0	0	0	0	0	1	0	0	0	0
A0A2A6BN68	UP000005239	Pristionchus pacificus	Nematoda	Metazoa	0	0	0	0	0	0	0	0	0	0	0	0	0	0	0	0	0	0	0	0	0	0	0	0	0	0	0	0	0	0	0	0	0	0	0	0	0	0	0	0	0	0	0	0	0
A0A8S1HPK3	UP000835052	Caenorhabditis auriculariae	Nematoda	Metazoa	0	0	0	0	0	0	0	0	0	0	0	0	0	0	0	0	0	0	0	0	0	0	0	0	0	0	0	0	0	0	0	0	0	0	0	0	0	0	0	0	1	0	0	0	0
A0A8S1FDA6	UP000494206	Caenorhabditis bovis	Nematoda	Metazoa	0	0	0	0	0	0	0	0	0	0	0	0	0	0	0	0	0	0	0	0	0	0	0	0	0	0	0	0	0	0	0	0	0	0	0	0	0	0	0	0	0	0	0	0	0
G0NEF7	UP000008068	Caenorhabditis brenneri	Nematoda	Metazoa	0	0	0	0	0	0	0	0	0	0	0	0	0	0	0	0	0	0	0	0	0	0	0	0	0	0	0	0	0	0	0	0	0	0	0	0	0	0	0	0	1	0	0	0	0
E3N7W5	UP000008281	Caenorhabditis remanei	Nematoda	Metazoa	0	0	0	0	0	0	0	0	0	0	0	0	0	0	0	0	0	0	0	0	0	0	0	0	0	0	0	0	0	0	0	0	0	0	0	0	0	0	0	0	1	0	0	0	0
A0A6G0T0E8	UP000475862	Aphis glycines	Arthropoda	Metazoa	0	0	0	0	0	0	0	0	0	0	0	0	0	0	0	0	0	0	0	0	0	0	0	0	0	0	0	0	0	0	0	0	0	0	0	0	0	0	0	0	1	0	0	0	0
A0A816B4D1	UP000663835	Rotaria sp. Silwood1	Rotifera	Metazoa	0	0	0	0	0	0	0	0	0	0	0	0	0	0	0	0	0	0	0	0	0	0	0	0	0	0	0	0	0	0	0	0	0	0	0	0	0	0	0	0	0	0	0	0	0
A0A016STV5	UP000024635	Ancylostoma ceylanicum	Nematoda	Metazoa	0	0	0	0	0	0	0	0	0	0	0	0	0	0	0	0	0	0	0	0	0	0	0	0	0	0	0	0	0	0	0	0	0	0	0	0	0	0	0	0	1	0	0	0	0
A0A2A6B5E8	UP000005239	Pristionchus pacificus	Nematoda	Metazoa	0	0	0	0	0	0	0	0	0	0	0	0	0	0	0	0	0	0	0	0	0	0	0	0	0	0	0	0	0	0	0	0	0	0	0	0	0	0	0	0	0	0	0	0	0
G0NJD8	UP000008068	Caenorhabditis brenneri	Nematoda	Metazoa	0	0	0	0	0	0	0	0	0	0	0	0	0	0	0	0	0	0	0	0	0	0	0	0	0	0	0	0	0	0	0	0	0	0	0	0	0	0	0	0	1	0	0	0	0
A0A2A2KX36	UP000218231	Diploscapter pachys	Nematoda	Metazoa	0	0	0	0	0	0	0	0	0	0	0	0	0	0	0	0	0	0	0	0	0	0	0	0	0	0	0	0	0	0	0	0	0	0	0	0	0	0	0	0	1	0	0	0	0
A0A8S1HN21	UP000835052	Caenorhabditis auriculariae	Nematoda	Metazoa	0	0	0	0	0	0	0	0	0	0	0	0	0	0	0	0	0	0	0	0	0	0	0	0	0	0	0	0	0	0	0	0	0	0	0	0	0	0	0	0	1	0	0	0	0
A0A498SFF1	UP000276991	Acanthocheilonema viteae	Nematoda	Metazoa	0	0	0	0	0	0	0	0	0	0	0	0	0	0	0	0	0	0	0	0	0	0	0	0	0	0	0	0	0	0	0	0	0	0	0	0	0	0	0	0	0	0	0	0	0
A0A8R2JL48	UP000007819	Acyrthosiphon pisum	Arthropoda	Metazoa	0	0	0	0	0	0	0	0	0	0	0	0	0	0	0	0	0	0	0	0	0	0	0	0	0	0	0	0	0	0	0	0	0	0	0	0	0	0	0	0	0	0	0	0	0
A0A8S1EXB2	UP000494206	Caenorhabditis bovis	Nematoda	Metazoa	0	0	0	0	0	0	0	0	0	0	0	0	0	0	0	0	0	0	0	0	0	0	0	0	0	0	0	0	0	0	0	0	0	0	0	0	0	0	0	0	0	0	0	0	0
A0A8J2NV01	UP000708208	Allacma fusca	Arthropoda	Metazoa	0	0	0	0	0	0	0	0	0	0	0	0	0	0	0	0	0	0	0	0	0	0	0	0	0	0	0	0	0	0	0	0	0	0	0	0	0	0	0	0	0	0	0	0	0
A0A915ALU1	UP000887569	Parascaris univalens	Nematoda	Metazoa	0	0	0	0	0	0	0	0	0	0	0	0	0	0	0	0	0	0	0	0	0	0	0	0	0	0	0	0	0	0	0	0	0	0	0	0	0	0	0	0	0	0	0	0	0
A0A915AMU0	UP000887569	Parascaris univalens	Nematoda	Metazoa	0	0	0	0	0	0	0	0	0	0	0	0	0	0	0	0	0	0	0	0	0	0	0	0	0	0	0	0	0	0	0	0	0	0	0	0	0	0	0	0	0	0	0	0	0
A0A915APK0	UP000887569	Parascaris univalens	Nematoda	Metazoa	0	0	0	0	0	0	0	0	0	0	0	0	0	0	0	0	0	0	0	0	0	0	0	0	0	0	0	0	0	0	0	0	0	0	0	0	0	0	0	0	0	0	0	0	0
A0A498S7I2	UP000276991	Acanthocheilonema viteae	Nematoda	Metazoa	0	0	0	0	0	0	0	0	0	0	0	0	0	0	0	0	0	0	0	0	0	0	0	0	0	0	0	0	0	0	0	0	0	0	0	0	0	0	0	0	0	0	0	0	0
A0A2A2JD73	UP000218231	Diploscapter pachys	Nematoda	Metazoa	0	0	0	0	0	0	0	0	0	0	0	0	0	0	0	0	0	0	0	0	0	0	0	0	0	0	0	0	0	0	0	0	0	0	0	0	0	0	0	0	1	0	0	0	0
A0A8J2M2A9	UP000746747	Cercopithifilaria johnstoni	Nematoda	Metazoa	0	0	0	0	0	0	0	0	0	0	0	0	0	0	0	0	0	0	0	0	0	0	0	0	0	0	0	0	0	0	0	0	0	0	0	0	0	0	0	0	0	0	0	0	0
A0A915ALU6	UP000887569	Parascaris univalens	Nematoda	Metazoa	0	0	0	0	0	0	0	0	0	0	0	0	0	0	0	0	0	0	0	0	0	0	0	0	0	0	0	0	0	0	0	0	0	0	0	0	0	0	0	0	0	0	0	0	0
A0A9P1J6B9	UP001152747	Caenorhabditis angaria	Nematoda	Metazoa	0	0	0	0	0	0	0	0	0	0	0	0	0	0	0	0	0	0	0	0	0	0	0	0	0	0	0	0	0	0	0	0	0	0	0	0	0	0	0	0	0	0	0	0	0
E3LEG9	UP000008281	Caenorhabditis remanei	Nematoda	Metazoa	0	0	0	0	0	0	0	0	0	0	0	0	0	0	0	0	0	0	0	0	0	0	0	0	0	0	0	0	0	0	0	0	0	0	0	0	0	0	0	0	1	0	0	0	0
A0A2G5U1W8	UP000230233	Caenorhabditis nigoni	Nematoda	Metazoa	0	0	0	0	0	0	0	0	0	0	0	0	0	0	0	0	0	0	0	0	0	0	0	0	0	0	0	0	0	0	0	0	0	0	0	0	0	0	0	0	0	0	0	0	0
A0A8S1GUJ4	UP000835052	Caenorhabditis auriculariae	Nematoda	Metazoa	0	0	0	0	0	0	0	0	0	0	0	0	0	0	0	0	0	0	0	0	0	0	0	0	0	0	0	0	0	0	0	0	0	0	0	0	0	0	0	0	0	0	0	0	0
A0A915PLY5	UP000887581	Setaria digitata	Nematoda	Metazoa	0	0	0	0	0	0	0	0	0	0	0	0	0	0	0	0	0	0	0	0	0	0	0	0	0	0	0	0	0	0	0	0	0	0	0	0	0	0	0	0	0	0	0	0	0
A0A913X9P8	UP000887567	Exaiptasia diaphana	Cnidaria	Metazoa	0	0	0	0	0	0	0	0	0	0	0	0	0	0	0	0	0	0	0	0	0	0	0	0	0	0	0	0	0	0	0	0	0	0	0	0	0	0	0	0	0	0	0	0	0
A0A8S1HSM7	UP000835052	Caenorhabditis auriculariae	Nematoda	Metazoa	0	0	0	0	0	0	0	0	0	0	0	0	0	0	0	0	0	0	0	0	0	0	0	0	0	0	0	0	0	0	0	0	0	0	0	0	0	0	0	0	0	0	0	0	0
A0A9P1MJX8	UP001154013	Auanema sp. JU1783	Nematoda	Metazoa	0	0	0	0	0	0	0	0	0	0	0	0	0	0	0	0	0	0	0	0	0	0	0	0	0	0	0	0	0	0	0	0	0	0	0	0	0	0	0	0	1	0	0	0	0
A0A8R1TYV5	UP000024404	Onchocerca volvulus	Nematoda	Metazoa	0	0	0	0	0	0	0	0	0	0	0	0	0	0	0	0	0	0	0	0	0	0	0	0	0	0	0	0	0	0	0	0	0	0	0	0	0	0	0	0	0	0	0	0	0
A0A3P6SK37	UP000277928	Litomosoides sigmodontis	Nematoda	Metazoa	0	0	0	0	0	0	0	0	0	0	0	0	0	0	0	0	0	0	0	0	0	0	0	0	0	0	0	0	0	0	0	0	0	0	0	0	0	0	0	0	0	0	0	0	0
E3NMA0	UP000008281	Caenorhabditis remanei	Nematoda	Metazoa	0	0	0	0	0	0	0	0	0	0	0	0	0	0	0	0	0	0	0	0	0	0	0	0	0	0	0	0	0	0	0	0	0	0	0	0	0	0	0	0	1	0	0	0	0
A0A2A2LDI2	UP000218231	Diploscapter pachys	Nematoda	Metazoa	0	0	0	0	0	0	0	0	0	0	0	0	0	0	0	0	0	0	0	0	0	0	0	0	0	0	0	0	0	0	0	0	0	0	0	0	0	0	0	0	1	0	0	0	0
A0A2G5VIP7	UP000230233	Caenorhabditis nigoni	Nematoda	Metazoa	0	0	0	0	0	0	0	0	0	0	0	0	0	0	0	0	0	0	0	0	0	0	0	0	0	0	0	0	0	0	0	0	0	0	0	0	0	0	0	0	1	0	0	0	0
A0A8C0FWW3	UP000694567	Bubo bubo	Chordata	Metazoa	0	0	0	0	0	0	0	0	0	0	0	0	0	0	0	0	0	0	0	0	0	0	0	0	0	0	0	0	0	0	0	0	0	0	0	0	0	0	0	0	0	0	0	0	0
A0A8S1EJY7	UP000494206	Caenorhabditis bovis	Nematoda	Metazoa	0	0	0	0	0	0	0	0	0	0	0	0	0	0	0	0	0	0	0	0	0	0	0	0	0	0	0	0	0	0	0	0	0	0	0	0	0	0	0	0	0	0	0	0	0
E3MSC8	UP000008281	Caenorhabditis remanei	Nematoda	Metazoa	0	0	0	0	0	0	0	0	0	0	0	0	0	0	0	0	0	0	0	0	0	0	0	0	0	0	0	0	0	0	0	0	0	0	0	0	0	0	0	0	1	0	0	0	0
G0P0K7	UP000008068	Caenorhabditis brenneri	Nematoda	Metazoa	0	0	0	0	0	0	0	0	0	0	0	0	0	0	0	0	0	0	0	0	0	0	0	0	0	0	0	0	0	0	0	0	0	0	0	0	0	0	0	0	0	0	0	0	0
A0A8R1HU12	UP000005237	Caenorhabditis japonica	Nematoda	Metazoa	0	0	0	0	0	0	0	0	0	0	0	0	0	0	0	0	0	0	0	0	0	0	0	0	0	0	0	0	0	0	0	0	0	0	0	0	0	0	0	0	0	0	0	0	0
Q9XVF1	UP000001940	Caenorhabditis elegans	Nematoda	Metazoa	0	0	0	0	0	0	0	0	0	0	0	0	0	0	0	0	0	0	0	0	0	0	0	0	0	0	0	0	0	0	0	0	0	0	0	0	0	0	0	0	0	0	0	0	0
A0A8D2G631	UP000694411	Theropithecus gelada	Chordata	Metazoa	0	0	0	0	0	0	0	0	0	0	0	0	0	0	0	0	0	0	0	0	0	0	0	0	0	0	0	0	0	0	0	0	0	0	0	0	0	0	0	0	0	0	0	0	0
A0A915AN53	UP000887569	Parascaris univalens	Nematoda	Metazoa	0	0	0	0	0	0	0	0	0	0	0	0	0	0	0	0	0	0	0	0	0	0	0	0	0	0	0	0	0	0	0	0	0	0	0	0	0	0	0	0	0	0	0	0	0
A0A8S1HGG8	UP000835052	Caenorhabditis auriculariae	Nematoda	Metazoa	0	0	0	0	0	0	0	0	0	0	0	0	0	0	0	0	0	0	0	0	0	0	0	0	0	0	0	0	0	0	0	0	0	0	0	0	0	0	0	0	0	0	0	0	0
A0A2G5ST50	UP000230233	Caenorhabditis nigoni	Nematoda	Metazoa	0	0	0	0	0	0	0	0	0	0	0	0	0	0	0	0	0	0	0	0	0	0	0	0	0	0	0	0	0	0	0	0	0	0	0	0	0	0	0	0	0	0	0	0	0
A0A913Z3C1	UP000887568	Patiria miniata	Echinodermata	Metazoa	0	0	0	0	0	0	0	0	0	0	0	0	0	0	0	0	0	0	0	0	0	0	0	0	0	0	0	0	0	0	0	0	0	0	0	0	0	0	0	0	0	0	0	0	0
A0A815I3J2	UP000663835	Rotaria sp. Silwood1	Rotifera	Metazoa	0	0	0	0	0	0	0	0	0	0	0	0	0	0	0	0	0	0	0	0	0	0	0	0	0	0	0	0	0	0	0	0	0	0	0	0	0	0	0	0	0	0	0	0	0
E3N975	UP000008281	Caenorhabditis remanei	Nematoda	Metazoa	0	0	0	0	0	0	0	0	0	0	0	0	0	0	0	0	0	0	0	0	0	0	0	0	0	0	0	0	0	0	0	0	0	0	0	0	0	0	0	0	1	0	0	0	0
A0AA36DTE4	UP001176961	Cylicocyclus nassatus	Nematoda	Metazoa	0	0	0	0	0	0	0	0	0	0	0	0	0	0	0	0	0	0	0	0	0	0	0	0	0	0	0	0	0	0	0	0	0	0	0	0	0	0	0	0	1	0	0	0	0
A0A815I4W0	UP000663835	Rotaria sp. Silwood1	Rotifera	Metazoa	0	0	0	0	0	0	0	0	0	0	0	0	0	0	0	0	0	0	0	0	0	0	0	0	0	0	0	0	0	0	0	0	0	0	0	0	0	0	0	0	0	0	0	0	0
A0A9P1ET82	UP001153352	Caenorhabditis sp. 36 PRJEB53466	Nematoda	Metazoa	0	0	0	0	0	0	0	0	0	0	0	0	0	0	0	0	0	0	0	0	0	0	0	0	0	0	0	0	0	0	0	0	0	0	0	0	0	0	0	0	1	0	0	0	0
A0A8C6ZNC5	UP000694420	Nothoprocta perdicaria	Chordata	Metazoa	0	0	0	0	0	0	0	0	0	0	0	0	0	0	0	0	0	0	0	0	0	0	0	0	0	0	0	0	0	0	0	0	0	0	0	0	0	0	0	0	0	0	0	0	0
A0A2A6BFI1	UP000005239	Pristionchus pacificus	Nematoda	Metazoa	0	0	0	0	0	0	0	0	0	0	0	0	0	0	0	0	0	0	0	0	0	0	0	0	0	0	0	0	0	0	0	0	0	0	0	0	0	0	0	0	0	0	0	0	0
A0A3P9Q1Y7	UP000242638	Poecilia reticulata	Chordata	Metazoa	0	0	0	0	0	0	0	0	0	0	0	0	0	0	0	0	0	0	0	0	0	0	0	0	0	0	0	0	0	0	0	0	0	0	0	0	0	0	0	0	0	0	0	0	0
A0A9P1A8G1	UP001153352	Caenorhabditis sp. 36 PRJEB53466	Nematoda	Metazoa	0	0	0	0	0	0	0	0	0	0	0	0	0	0	0	0	0	0	0	0	0	0	0	0	0	0	0	0	0	0	0	0	0	0	0	0	0	0	0	0	0	0	0	0	0
A0A9P1HN99	UP001154013	Auanema sp. JU1783	Nematoda	Metazoa	0	0	0	0	0	0	0	0	0	0	0	0	0	0	0	0	0	0	0	0	0	0	0	0	0	0	0	0	0	0	0	0	0	0	0	0	0	0	0	0	0	0	0	0	0
G0NG46	UP000008068	Caenorhabditis brenneri	Nematoda	Metazoa	0	0	0	0	0	0	0	0	0	0	0	0	0	0	0	0	0	0	0	0	0	0	0	0	0	0	0	0	0	0	0	0	0	0	0	0	0	0	0	0	0	0	0	0	0
E3M3T5	UP000008281	Caenorhabditis remanei	Nematoda	Metazoa	0	0	0	0	0	0	0	0	0	0	0	0	0	0	0	0	0	0	0	0	0	0	0	0	0	0	0	0	0	0	0	0	0	0	0	0	0	0	0	0	0	0	0	0	0
A0A2A6BKV3	UP000005239	Pristionchus pacificus	Nematoda	Metazoa	0	0	0	0	0	0	0	0	0	0	0	0	0	0	0	0	0	0	0	0	0	0	0	0	0	0	0	0	0	0	0	0	0	0	0	0	0	0	0	0	0	0	0	0	0
G0NJR6	UP000008068	Caenorhabditis brenneri	Nematoda	Metazoa	0	0	0	0	0	0	0	0	0	0	0	0	0	0	0	0	0	0	0	0	0	0	0	0	0	0	0	0	0	0	0	0	0	0	0	0	0	0	0	0	1	0	0	0	0
A0A2G5U890	UP000230233	Caenorhabditis nigoni	Nematoda	Metazoa	0	0	0	0	0	0	0	0	0	0	0	0	0	0	0	0	0	0	0	0	0	0	0	0	0	0	0	0	0	0	0	0	0	0	0	0	0	0	0	0	0	0	0	0	0
A0AAF3ETW7	UP000887575	Mesorhabditis belari	Nematoda	Metazoa	0	0	0	0	0	0	0	0	0	0	0	0	0	0	0	0	0	0	0	0	0	0	0	0	0	0	0	0	0	0	0	0	0	0	0	0	0	0	0	0	1	0	0	0	0
A0A820RB39	UP000663884	Rotaria sp. Silwood2	Rotifera	Metazoa	0	0	0	0	0	0	0	0	0	0	0	0	0	0	0	0	0	0	0	0	0	0	0	0	0	0	0	0	0	0	0	0	0	0	0	0	0	0	0	0	0	0	0	0	0
A0A8S1HDP8	UP000835052	Caenorhabditis auriculariae	Nematoda	Metazoa	0	0	0	0	0	0	0	0	0	0	0	0	0	0	0	0	0	0	0	0	0	0	0	0	0	0	0	0	0	0	0	0	0	0	0	0	0	0	0	0	0	0	0	0	0
H2KZD5	UP000001940	Caenorhabditis elegans	Nematoda	Metazoa	0	0	0	0	0	0	0	0	0	0	0	0	0	0	0	0	0	0	0	0	0	0	0	0	0	0	0	0	0	0	0	0	0	0	0	0	0	0	0	0	0	0	0	0	0
G0P8N1	UP000008068	Caenorhabditis brenneri	Nematoda	Metazoa	0	0	0	0	0	0	0	0	0	0	0	0	0	0	0	0	0	0	0	0	0	0	0	0	0	0	0	0	0	0	0	0	0	0	0	0	0	0	0	0	0	0	0	0	0
E3NHU2	UP000008281	Caenorhabditis remanei	Nematoda	Metazoa	0	0	0	0	0	0	0	0	0	0	0	0	0	0	0	0	0	0	0	0	0	0	0	0	0	0	0	0	0	0	0	0	0	0	0	0	0	0	0	0	0	0	0	0	0
A0A915CHF2	UP000887569	Parascaris univalens	Nematoda	Metazoa	0	0	0	0	0	0	0	0	0	0	0	0	0	0	0	0	0	0	0	0	0	0	0	0	0	0	0	0	0	0	0	0	0	0	0	0	0	0	0	0	0	0	0	0	0
G0MF32	UP000008068	Caenorhabditis brenneri	Nematoda	Metazoa	0	0	0	0	0	0	0	0	0	0	0	0	0	0	0	0	0	0	0	0	0	0	0	0	0	0	0	0	0	0	0	0	0	0	0	0	0	0	0	0	0	0	0	0	0
A0A8R1HPD3	UP000005237	Caenorhabditis japonica	Nematoda	Metazoa	0	0	0	0	0	0	0	0	0	0	0	0	0	0	0	0	0	0	0	0	0	0	0	0	0	0	0	0	0	0	0	0	0	0	0	0	0	0	0	0	1	0	0	0	0
A0A8C0E856	UP000694567	Bubo bubo	Chordata	Metazoa	0	0	0	0	0	0	0	0	0	0	0	0	0	0	0	0	0	0	0	0	0	0	0	0	0	0	0	0	0	0	0	0	0	0	0	0	0	0	0	0	0	0	0	0	0
A0A2A2JMX5	UP000218231	Diploscapter pachys	Nematoda	Metazoa	0	0	0	0	0	0	0	0	0	0	0	0	0	0	0	0	0	0	0	0	0	0	0	0	0	0	0	0	0	0	0	0	0	0	0	0	0	0	0	0	1	0	0	0	0
A0A814JKQ7	UP000663870	Rotaria sordida	Rotifera	Metazoa	0	0	0	0	0	0	0	0	0	0	0	0	0	0	0	0	0	0	0	0	0	0	0	0	0	0	0	0	0	0	0	0	0	0	0	0	0	0	0	0	0	0	0	0	0
G0P263	UP000008068	Caenorhabditis brenneri	Nematoda	Metazoa	0	0	0	0	0	0	0	0	0	0	0	0	0	0	0	0	0	0	0	0	0	0	0	0	0	0	0	0	0	0	0	0	0	0	0	0	0	0	0	0	0	0	0	0	0
A0A2A2LTX7	UP000218231	Diploscapter pachys	Nematoda	Metazoa	0	0	0	0	0	0	0	0	0	0	0	0	0	0	0	0	0	0	0	0	0	0	0	0	0	0	0	0	0	0	0	0	0	0	0	0	0	0	0	0	0	0	0	0	0
A0A016W0K3	UP000024635	Ancylostoma ceylanicum	Nematoda	Metazoa	0	0	0	0	0	0	0	0	0	0	0	0	0	0	0	0	0	0	0	0	0	0	0	0	0	0	0	0	0	0	0	0	0	0	0	0	0	0	0	0	0	0	0	0	0
A0A2A2K3G2	UP000218231	Diploscapter pachys	Nematoda	Metazoa	0	0	0	0	0	0	0	0	0	0	0	0	0	0	0	0	0	0	0	0	0	0	0	0	0	0	0	0	0	0	0	0	0	0	0	0	0	0	0	0	0	0	0	0	0
A0A2A2KK15	UP000218231	Diploscapter pachys	Nematoda	Metazoa	0	0	0	0	0	0	0	0	0	0	0	0	0	0	0	0	0	0	0	0	0	0	0	0	0	0	0	0	0	0	0	0	0	0	0	0	0	0	0	0	0	0	0	0	0
A0A2A4JX21	UP000218220	Heliothis virescens	Arthropoda	Metazoa	0	0	0	0	0	0	0	0	0	0	0	0	0	0	0	0	0	0	0	0	0	0	0	0	0	0	0	0	0	0	0	0	0	0	0	0	0	0	0	0	1	0	0	0	0
A0A2A2JLM3	UP000218231	Diploscapter pachys	Nematoda	Metazoa	0	0	0	0	0	0	0	0	0	0	0	0	0	0	0	0	0	0	0	0	0	0	0	0	0	0	0	0	0	0	0	0	0	0	0	0	0	0	0	0	0	0	0	0	0
A0AA36FTG5	UP001177023	Mesorhabditis spiculigera	Nematoda	Metazoa	0	0	0	0	0	0	0	0	0	0	0	0	0	0	0	0	0	0	0	0	0	0	0	0	0	0	0	0	0	0	0	0	0	0	0	0	0	0	0	0	0	0	0	0	0
A0A8R1DRE7	UP000005237	Caenorhabditis japonica	Nematoda	Metazoa	0	0	0	0	0	0	0	0	0	0	0	0	0	0	0	0	0	0	0	0	0	0	0	0	0	0	0	0	0	0	0	0	0	0	0	0	0	0	0	0	1	0	0	0	0
A0A8S1FCV0	UP000494206	Caenorhabditis bovis	Nematoda	Metazoa	0	0	0	0	0	0	0	0	0	0	0	0	0	0	0	0	0	0	0	0	0	0	0	0	0	0	0	0	0	0	0	0	0	0	0	0	0	0	0	0	0	0	0	0	0
G0MF31	UP000008068	Caenorhabditis brenneri	Nematoda	Metazoa	0	0	0	0	0	0	0	0	0	0	0	0	0	0	0	0	0	0	0	0	0	0	0	0	0	0	0	0	0	0	0	0	0	0	0	0	0	0	0	0	0	0	0	0	0
A0A8R1EP19	UP000005237	Caenorhabditis japonica	Nematoda	Metazoa	0	0	0	0	0	0	0	0	0	0	0	0	0	0	0	0	0	0	0	0	0	0	0	0	0	0	0	0	0	0	0	0	0	0	0	0	0	0	0	0	0	0	0	0	0
A0A9P1A7V1	UP001153352	Caenorhabditis sp. 36 PRJEB53466	Nematoda	Metazoa	0	0	0	0	0	0	0	0	0	0	0	0	0	0	0	0	0	0	0	0	0	0	0	0	0	0	0	0	0	0	0	0	0	0	0	0	0	0	0	0	0	0	0	0	0
G0P0K3	UP000008068	Caenorhabditis brenneri	Nematoda	Metazoa	0	0	0	0	0	0	0	0	0	0	0	0	0	0	0	0	0	0	0	0	0	0	0	0	0	0	0	0	0	0	0	0	0	0	0	0	0	0	0	0	0	0	0	0	0
G0P8N0	UP000008068	Caenorhabditis brenneri	Nematoda	Metazoa	0	0	0	0	0	0	0	0	0	0	0	0	0	0	0	0	0	0	0	0	0	0	0	0	0	0	0	0	0	0	0	0	0	0	0	0	0	0	0	0	0	0	0	0	0
A0A8R1DKJ2	UP000005237	Caenorhabditis japonica	Nematoda	Metazoa	0	0	0	0	0	0	0	0	0	0	0	0	0	0	0	0	0	0	0	0	0	0	0	0	0	0	0	0	0	0	0	0	0	0	0	0	0	0	0	0	0	0	0	0	0
A0AAF3F3V7	UP000887575	Mesorhabditis belari	Nematoda	Metazoa	0	0	0	0	0	0	0	0	0	0	0	0	0	0	0	0	0	0	0	0	0	0	0	0	0	0	0	0	0	0	0	0	0	0	0	0	0	0	0	0	0	0	0	0	0
A0A7R9Q9R0	UP000759131	Medioppia subpectinata	Arthropoda	Metazoa	0	0	0	0	0	0	0	0	0	0	0	0	0	0	0	0	0	0	0	0	0	0	0	0	0	0	0	0	0	0	0	0	0	0	0	0	0	0	0	0	0	0	0	0	0
A0A2A2KLK7	UP000218231	Diploscapter pachys	Nematoda	Metazoa	0	0	0	0	0	0	0	0	0	0	0	0	0	0	0	0	0	0	0	0	0	0	0	0	0	0	0	0	0	0	0	0	0	0	0	0	0	0	0	0	0	0	0	0	0
A0A2G5TK03	UP000230233	Caenorhabditis nigoni	Nematoda	Metazoa	0	0	0	0	0	0	0	0	0	0	0	0	0	0	0	0	0	0	0	0	0	0	0	0	0	0	0	0	0	0	0	0	0	0	0	0	0	0	0	0	0	0	0	0	0
G0NA18	UP000008068	Caenorhabditis brenneri	Nematoda	Metazoa	0	0	0	0	0	0	0	0	0	0	0	0	0	0	0	0	0	0	0	0	0	0	0	0	0	0	0	0	0	0	0	0	0	0	0	0	0	0	0	0	1	0	0	0	0
A0A2A2J780	UP000218231	Diploscapter pachys	Nematoda	Metazoa	0	0	0	0	0	0	0	0	0	0	0	0	0	0	0	0	0	0	0	0	0	0	0	0	0	0	0	0	0	0	0	0	0	0	0	0	0	0	0	0	0	0	0	0	0
A0A8W8N385	UP000005408	Magallana gigas	Mollusca	Metazoa	0	0	0	0	0	0	0	0	0	0	0	0	0	0	0	0	0	0	0	0	0	0	0	0	0	0	0	0	0	0	0	0	0	0	0	0	0	0	0	0	0	0	0	0	0
G0NW21	UP000008068	Caenorhabditis brenneri	Nematoda	Metazoa	0	0	0	0	0	0	0	0	0	0	0	0	0	0	0	0	0	0	0	0	0	0	0	0	0	0	0	0	0	0	0	0	0	0	0	0	0	0	0	0	1	0	0	0	0
G0NFJ8	UP000008068	Caenorhabditis brenneri	Nematoda	Metazoa	0	0	0	0	0	0	0	0	0	0	0	0	0	0	0	0	0	0	0	0	0	0	0	0	0	0	0	0	0	0	0	0	0	0	0	0	0	0	0	0	0	0	0	0	0
A0A8C3YRA6	UP000694540	Catagonus wagneri	Chordata	Metazoa	0	0	0	0	0	0	0	0	0	0	0	0	0	0	0	0	0	0	0	0	0	0	0	0	0	0	0	0	0	0	0	0	0	0	0	0	0	0	0	0	0	0	0	0	0
A0A8S1EDH7	UP000494206	Caenorhabditis bovis	Nematoda	Metazoa	0	0	0	0	0	0	0	0	0	0	0	0	0	0	0	0	0	0	0	0	0	0	0	0	0	0	0	0	0	0	0	0	0	0	0	0	0	0	0	0	0	0	0	0	0
A0A2A6CGB3	UP000005239	Pristionchus pacificus	Nematoda	Metazoa	0	0	0	0	0	0	0	0	0	0	0	0	0	0	0	0	0	0	0	0	0	0	0	0	0	0	0	0	0	0	0	0	0	0	0	0	0	0	0	0	0	0	0	0	0
A0A8S1FDA1	UP000494206	Caenorhabditis bovis	Nematoda	Metazoa	0	0	0	0	0	0	0	0	0	0	0	0	0	0	0	0	0	0	0	0	0	0	0	0	0	0	0	0	0	0	0	0	0	0	0	0	0	0	0	0	0	0	0	0	0
T1J398	UP000014500	Strigamia maritima	Arthropoda	Metazoa	0	0	0	0	0	0	0	0	0	0	0	0	0	0	0	0	0	0	0	0	0	0	0	0	0	0	0	0	0	0	0	0	0	0	0	0	0	0	0	0	0	0	0	0	0
A0A2A2J3G6	UP000218231	Diploscapter pachys	Nematoda	Metazoa	0	0	0	0	0	0	0	0	0	0	0	0	0	0	0	0	0	0	0	0	0	0	0	0	0	0	0	0	0	0	0	0	0	0	0	0	0	0	0	0	0	0	0	0	0
Q86NJ8	UP000001940	Caenorhabditis elegans	Nematoda	Metazoa	0	0	0	0	0	0	0	0	0	0	0	0	0	0	0	0	0	0	0	0	0	0	0	0	0	0	0	0	0	0	0	0	0	0	0	0	0	0	0	0	1	0	0	0	0
A0A820XDW4	UP000663873	Rotaria socialis	Rotifera	Metazoa	0	0	0	0	0	0	0	0	0	0	0	0	0	0	0	0	0	0	0	0	0	0	0	0	0	0	0	0	0	0	0	0	0	0	0	0	0	0	0	0	0	0	0	0	0
A0A9P1MVA3	UP001152747	Caenorhabditis angaria	Nematoda	Metazoa	0	0	0	0	0	0	0	0	0	0	0	0	0	0	0	0	0	0	0	0	0	0	0	0	0	0	0	0	0	0	0	0	0	0	0	0	0	0	0	0	1	0	0	0	0
A0A0U1RML5	UP000001940	Caenorhabditis elegans	Nematoda	Metazoa	0	0	0	0	0	0	0	0	0	0	0	0	0	0	0	0	0	0	0	0	0	0	0	0	0	0	0	0	0	0	0	0	0	0	0	0	0	0	0	0	1	0	0	0	0
A0A8S9XS55	UP000466442	Apolygus lucorum	Arthropoda	Metazoa	0	0	0	0	0	0	0	0	0	0	0	0	0	0	0	0	0	0	0	0	0	0	0	0	0	0	0	0	0	0	0	0	0	0	0	0	0	0	0	0	0	0	0	0	0
A0A6G0THC2	UP000475862	Aphis glycines	Arthropoda	Metazoa	0	0	0	0	0	0	0	0	0	0	0	0	0	0	0	0	0	0	0	0	0	0	0	0	0	0	0	0	0	0	0	0	0	0	0	0	0	0	0	0	1	0	0	0	0
A0A9P1N4Z6	UP001152747	Caenorhabditis angaria	Nematoda	Metazoa	0	0	0	0	0	0	0	0	0	0	0	0	0	0	0	0	0	0	0	0	0	0	0	0	0	0	0	0	0	0	0	0	0	0	0	0	0	0	0	0	0	0	0	0	0
A0AAF3F563	UP000887575	Mesorhabditis belari	Nematoda	Metazoa	0	0	0	0	0	0	0	0	0	0	0	0	0	0	0	0	0	0	0	0	0	0	0	0	0	0	0	0	0	0	0	0	0	0	0	0	0	0	0	0	1	0	0	0	0
E3MC50	UP000008281	Caenorhabditis remanei	Nematoda	Metazoa	0	0	0	0	0	0	0	0	0	0	0	0	0	0	0	0	0	0	0	0	0	0	0	0	0	0	0	0	0	0	0	0	0	0	0	0	0	0	0	0	0	0	0	0	0
A0A671RIU9	UP000472260	Sinocyclocheilus anshuiensis	Chordata	Metazoa	0	0	0	0	0	0	0	0	0	0	0	0	0	0	0	0	0	0	0	0	0	0	0	0	0	0	0	0	0	0	0	0	0	0	0	0	0	0	0	0	0	0	0	0	0
E3NAX4	UP000008281	Caenorhabditis remanei	Nematoda	Metazoa	0	0	0	0	0	0	0	0	0	0	0	0	0	0	0	0	0	0	0	0	0	0	0	0	0	0	0	0	0	0	0	0	0	0	0	0	0	0	0	0	0	0	0	0	0
A0A8S1H3E4	UP000835052	Caenorhabditis auriculariae	Nematoda	Metazoa	0	0	0	0	0	0	0	0	0	0	0	0	0	0	0	0	0	0	0	0	0	0	0	0	0	0	0	0	0	0	0	0	0	0	0	0	0	0	0	0	0	0	0	0	0
A0A1D1UFI1	UP000186922	Ramazzottius varieornatus	Tardigrada	Metazoa	0	0	0	0	0	0	0	0	0	0	0	0	0	0	0	0	0	0	0	0	0	0	0	0	0	0	0	0	0	0	0	0	0	0	0	0	0	0	0	0	0	0	0	0	0
A0A670KFH4	UP000472272	Podarcis muralis	Chordata	Metazoa	0	0	0	0	0	0	0	0	0	0	0	0	0	0	0	0	0	0	0	0	0	0	0	0	0	0	0	0	0	0	0	0	0	0	0	0	0	0	0	0	0	0	0	0	0
A0A9P1AEY8	UP001153352	Caenorhabditis sp. 36 PRJEB53466	Nematoda	Metazoa	0	0	0	0	0	0	0	0	0	0	0	0	0	0	0	0	0	0	0	0	0	0	0	0	0	0	0	0	0	0	0	0	0	0	0	0	0	0	0	0	1	0	0	0	0
A0A8S1GT66	UP000835052	Caenorhabditis auriculariae	Nematoda	Metazoa	0	0	0	0	0	0	0	0	0	0	0	0	0	0	0	0	0	0	0	0	0	0	0	0	0	0	0	0	0	0	0	0	0	0	0	0	0	0	0	0	0	0	0	0	0
A0A2A6CS84	UP000005239	Pristionchus pacificus	Nematoda	Metazoa	0	0	0	0	0	0	0	0	0	0	0	0	0	0	0	0	0	0	0	0	0	0	0	0	0	0	0	0	0	0	0	0	0	0	0	0	0	0	0	0	0	0	0	0	0
A0A2A2KTP4	UP000218231	Diploscapter pachys	Nematoda	Metazoa	0	0	0	0	0	0	0	0	0	0	0	0	0	0	0	0	0	0	0	0	0	0	0	0	0	0	0	0	0	0	0	0	0	0	0	0	0	0	0	0	0	0	0	0	0
A0A815YJF6	UP000663828	Adineta ricciae	Rotifera	Metazoa	0	0	0	0	0	0	0	0	0	0	0	0	0	0	0	0	0	0	0	0	0	0	0	0	0	0	0	0	0	0	0	0	0	0	0	0	0	0	0	0	0	0	0	0	0
A0AA39HK89	UP001175271	Steinernema hermaphroditum	Nematoda	Metazoa	0	0	0	0	0	0	0	0	0	0	0	0	0	0	0	0	0	0	0	0	0	0	0	0	0	0	0	0	0	0	0	0	0	0	0	0	0	0	0	0	1	0	0	0	0
A0A1D1WA89	UP000186922	Ramazzottius varieornatus	Tardigrada	Metazoa	0	0	0	0	0	0	0	0	0	0	0	0	0	0	0	0	0	0	0	0	0	0	0	0	0	0	0	0	0	0	0	0	0	0	0	0	0	0	0	0	0	0	0	0	0
A0AA39MBG3	UP001175271	Steinernema hermaphroditum	Nematoda	Metazoa	0	0	0	0	0	0	0	0	0	0	0	0	0	0	0	0	0	0	0	0	0	0	0	0	0	0	0	0	0	0	0	0	0	0	0	0	0	0	0	0	1	0	0	0	0
A0A913Z3A2	UP000887568	Patiria miniata	Echinodermata	Metazoa	0	0	0	0	0	0	0	0	0	0	0	0	0	0	0	0	0	0	0	0	0	0	0	0	0	0	0	0	0	0	0	0	0	0	0	0	0	0	0	0	0	0	0	0	0
A0A913Z031	UP000887568	Patiria miniata	Echinodermata	Metazoa	0	0	0	0	0	0	0	0	0	0	0	0	0	0	0	0	0	0	0	0	0	0	0	0	0	0	0	0	0	0	0	0	0	0	0	0	0	0	0	0	0	0	0	0	0
A0A2A2L5H0	UP000218231	Diploscapter pachys	Nematoda	Metazoa	0	0	0	0	0	0	0	0	0	0	0	0	0	0	0	0	0	0	0	0	0	0	0	0	0	0	0	0	0	0	0	0	0	0	0	0	0	0	0	0	0	0	0	0	0
A0A2A2LZD6	UP000218231	Diploscapter pachys	Nematoda	Metazoa	0	0	0	0	0	0	0	0	0	0	0	0	0	0	0	0	0	0	0	0	0	0	0	0	0	0	0	0	0	0	0	0	0	0	0	0	0	0	0	0	0	0	0	0	0
A0A820BB05	UP000663884	Rotaria sp. Silwood2	Rotifera	Metazoa	0	0	0	0	0	0	0	0	0	0	0	0	0	0	0	0	0	0	0	0	0	0	0	0	0	0	0	0	0	0	0	0	0	0	0	0	0	0	0	0	0	0	0	0	0
A0A7R9M517	UP000728032	Oppiella nova	Arthropoda	Metazoa	0	0	0	0	0	0	0	0	0	0	0	0	0	0	0	0	0	0	0	0	0	0	0	0	0	0	0	0	0	0	0	0	0	0	0	0	0	0	0	0	0	0	0	0	0
A0A8S1F846	UP000494206	Caenorhabditis bovis	Nematoda	Metazoa	0	0	0	0	0	0	0	0	0	0	0	0	0	0	0	0	0	0	0	0	0	0	0	0	0	0	0	0	0	0	0	0	0	0	0	0	0	0	0	0	0	0	0	0	0
A0AAF3F257	UP000887575	Mesorhabditis belari	Nematoda	Metazoa	0	0	0	0	0	0	0	0	0	0	0	0	0	0	0	0	0	0	0	0	0	0	0	0	0	0	0	0	0	0	0	0	0	0	0	0	0	0	0	0	1	0	0	0	0
A0A1D1VV37	UP000186922	Ramazzottius varieornatus	Tardigrada	Metazoa	0	0	0	0	0	0	0	0	0	0	0	0	0	0	0	0	0	0	0	0	0	0	0	0	0	0	0	0	0	0	0	0	0	0	0	0	0	0	0	0	0	0	0	0	0
A0AAF3ET58	UP000887575	Mesorhabditis belari	Nematoda	Metazoa	0	0	0	0	0	0	0	0	0	0	0	0	0	0	0	0	0	0	0	0	0	0	0	0	0	0	0	0	0	0	0	0	0	0	0	0	0	0	0	0	0	0	0	0	0
A0A8S1EMX2	UP000494206	Caenorhabditis bovis	Nematoda	Metazoa	0	0	0	0	0	0	0	0	0	0	0	0	0	0	0	0	0	0	0	0	0	0	0	0	0	0	0	0	0	0	0	0	0	0	0	0	0	0	0	0	0	0	0	0	0
A0A8S1EWK7	UP000494206	Caenorhabditis bovis	Nematoda	Metazoa	0	0	0	0	0	0	0	0	0	0	0	0	0	0	0	0	0	0	0	0	0	0	0	0	0	0	0	0	0	0	0	0	0	0	0	0	0	0	0	0	0	0	0	0	0
A0A2A2JDK4	UP000218231	Diploscapter pachys	Nematoda	Metazoa	0	0	0	0	0	0	0	0	0	0	0	0	0	0	0	0	0	0	0	0	0	0	0	0	0	0	0	0	0	0	0	0	0	0	0	0	0	0	0	0	0	0	0	0	0
A0A816AV77	UP000663829	Didymodactylos carnosus	Rotifera	Metazoa	0	0	0	0	0	0	0	0	0	0	0	0	0	0	0	0	0	0	0	0	0	0	0	0	0	0	0	0	0	0	0	0	0	0	0	0	0	0	0	0	0	0	0	0	0
A0AAF3ET23	UP000887575	Mesorhabditis belari	Nematoda	Metazoa	0	0	0	0	0	0	0	0	0	0	0	0	0	0	0	0	0	0	0	0	0	0	0	0	0	0	0	0	0	0	0	0	0	0	0	0	0	0	0	0	0	0	0	0	0
A0A8R1Z7X6	UP000005239	Pristionchus pacificus	Nematoda	Metazoa	0	0	0	0	0	0	0	0	0	0	0	0	0	0	0	0	0	0	0	0	0	0	0	0	0	0	0	0	0	0	0	0	0	0	0	0	0	0	0	0	0	0	0	0	0
A0A2G5U1W6	UP000230233	Caenorhabditis nigoni	Nematoda	Metazoa	0	0	0	0	0	0	0	0	0	0	0	0	0	0	0	0	0	0	0	0	0	0	0	0	0	0	0	0	0	0	0	0	0	0	0	0	0	0	0	0	0	0	0	0	0
A0A820T8J5	UP000663884	Rotaria sp. Silwood2	Rotifera	Metazoa	0	0	0	0	0	0	0	0	0	0	0	0	0	0	0	0	0	0	0	0	0	0	0	0	0	0	0	0	0	0	0	0	0	0	0	0	0	0	0	0	1	0	0	0	0
G0MXR8	UP000008068	Caenorhabditis brenneri	Nematoda	Metazoa	0	0	0	0	0	0	0	0	0	0	0	0	0	0	0	0	0	0	0	0	0	0	0	0	0	0	0	0	0	0	0	0	0	0	0	0	0	0	0	0	1	0	0	0	0
A0A816HIS3	UP000663828	Adineta ricciae	Rotifera	Metazoa	0	0	0	0	0	0	0	0	0	0	0	0	0	0	0	0	0	0	0	0	0	0	0	0	0	0	0	0	0	0	0	0	0	0	0	0	0	0	0	0	0	0	0	0	0
A0A913Z138	UP000887568	Patiria miniata	Echinodermata	Metazoa	0	0	0	0	0	0	0	0	0	0	0	0	0	0	0	0	0	0	0	0	0	0	0	0	0	0	0	0	0	0	0	0	0	0	0	0	0	0	0	0	0	0	0	0	0
A0A2A2JSF0	UP000218231	Diploscapter pachys	Nematoda	Metazoa	0	0	0	0	0	0	0	0	0	0	0	0	0	0	0	0	0	0	0	0	0	0	0	0	0	0	0	0	0	0	0	0	0	0	0	0	0	0	0	0	0	0	0	0	0
A0A8R2NU08	UP000007819	Acyrthosiphon pisum	Arthropoda	Metazoa	0	0	0	0	0	0	0	0	0	0	0	0	0	0	0	0	0	0	0	0	0	0	0	0	0	0	0	0	0	0	0	0	0	0	0	0	0	0	0	0	0	0	0	0	0
A0A9P0J4L4	UP001154329	Aphis gossypii	Arthropoda	Metazoa	0	0	0	0	0	0	0	0	0	0	0	0	0	0	0	0	0	0	0	0	0	0	0	0	0	0	0	0	0	0	0	0	0	0	0	0	0	0	0	0	0	0	0	0	0
A0A8R2JRC9	UP000007819	Acyrthosiphon pisum	Arthropoda	Metazoa	0	0	0	0	0	0	0	0	0	0	0	0	0	0	0	0	0	0	0	0	0	0	0	0	0	0	0	0	0	0	0	0	0	0	0	0	0	0	0	0	0	0	0	0	0
A0AA36M3A5	UP001176961	Cylicocyclus nassatus	Nematoda	Metazoa	0	0	0	0	0	0	0	0	0	0	0	0	0	0	0	0	0	0	0	0	0	0	0	0	0	0	0	0	0	0	0	0	0	0	0	0	0	0	0	0	0	0	0	0	0
A0A821JNK7	UP000663884	Rotaria sp. Silwood2	Rotifera	Metazoa	0	0	0	0	0	0	0	0	0	0	0	0	0	0	0	0	0	0	0	0	0	0	0	0	0	0	0	0	0	0	0	0	0	0	0	0	0	0	0	0	0	0	0	0	0
A0A816HNY2	UP000663828	Adineta ricciae	Rotifera	Metazoa	0	0	0	0	0	0	0	0	0	0	0	0	0	0	0	0	0	0	0	0	0	0	0	0	0	0	0	0	0	0	0	0	0	0	0	0	0	0	0	0	0	0	0	0	0
A0A9Q1IHS7	UP001152622	Synaphobranchus kaupii	Chordata	Metazoa	0	0	0	0	0	0	0	0	0	0	0	0	0	0	0	0	0	0	0	0	0	0	0	0	0	0	0	0	0	0	0	0	0	0	0	0	0	0	0	0	0	0	0	0	0
A0A2A6B5E5	UP000005239	Pristionchus pacificus	Nematoda	Metazoa	0	0	0	0	0	0	0	0	0	0	0	0	0	0	0	0	0	0	0	0	0	0	0	0	0	0	0	0	0	0	0	0	0	0	0	0	0	0	0	0	0	0	0	0	0
A0AA39M580	UP001175271	Steinernema hermaphroditum	Nematoda	Metazoa	0	0	0	0	0	0	0	0	0	0	0	0	0	0	0	0	0	0	0	0	0	0	0	0	0	0	0	0	0	0	0	0	0	0	0	0	0	0	0	0	0	0	0	0	0
A0A8J2WIJ5	UP000789390	Daphnia galeata	Arthropoda	Metazoa	0	0	0	0	0	0	0	0	0	0	0	0	0	0	0	0	0	0	0	0	0	0	0	0	0	0	0	0	0	0	0	0	0	0	0	0	0	0	0	0	0	0	0	0	0
A0A8C9CGK9	UP000694554	Phocoena sinus	Chordata	Metazoa	0	0	0	0	0	0	0	0	0	0	0	0	0	0	0	0	0	0	0	0	0	0	0	0	0	0	0	0	0	0	0	0	0	0	0	0	0	0	0	0	0	0	0	0	0
A0A8S1FF75	UP000494206	Caenorhabditis bovis	Nematoda	Metazoa	0	0	0	0	0	0	0	0	0	0	0	0	0	0	0	0	0	0	0	0	0	0	0	0	0	0	0	0	0	0	0	0	0	0	0	0	0	0	0	0	0	0	0	0	0
A0AA39H7L8	UP001175271	Steinernema hermaphroditum	Nematoda	Metazoa	0	0	0	0	0	0	0	0	0	0	0	0	0	0	0	0	0	0	0	0	0	0	0	0	0	0	0	0	0	0	0	0	0	0	0	0	0	0	0	0	0	0	0	0	0
A0A9P1EUM3	UP001153352	Caenorhabditis sp. 36 PRJEB53466	Nematoda	Metazoa	0	0	0	0	0	0	0	0	0	0	0	0	0	0	0	0	0	0	0	0	0	0	0	0	0	0	0	0	0	0	0	0	0	0	0	0	0	0	0	0	0	0	0	0	0
A0AA39HYC1	UP001175271	Steinernema hermaphroditum	Nematoda	Metazoa	0	0	0	0	0	0	0	0	0	0	0	0	0	0	0	0	0	0	0	0	0	0	0	0	0	0	0	0	0	0	0	0	0	0	0	0	0	0	0	0	0	0	0	0	0
A0A7R9QYS4	UP000728032	Oppiella nova	Arthropoda	Metazoa	0	0	0	0	0	0	0	0	0	0	0	0	0	0	0	0	0	0	0	0	0	0	0	0	0	0	0	0	0	0	0	0	0	0	0	0	0	0	0	0	0	0	0	0	0
A0A3M6U0H3	UP000275408	Pocillopora damicornis	Cnidaria	Metazoa	0	0	0	0	0	0	0	0	0	0	0	0	0	0	0	0	0	0	0	0	0	0	0	0	0	0	0	0	0	0	0	0	0	0	0	0	0	0	0	0	0	0	0	0	0
G0NA16	UP000008068	Caenorhabditis brenneri	Nematoda	Metazoa	0	0	0	0	0	0	0	0	0	0	0	0	0	0	0	0	0	0	0	0	0	0	0	0	0	0	0	0	0	0	0	0	0	0	0	0	0	0	0	0	0	0	0	0	0
A0A2G5TDB3	UP000230233	Caenorhabditis nigoni	Nematoda	Metazoa	0	0	0	0	0	0	0	0	0	0	0	0	0	0	0	0	0	0	0	0	0	0	0	0	0	0	0	0	0	0	0	0	0	0	0	0	0	0	0	0	1	0	0	0	0
A0A8S1DUB1	UP000494165	Cloeon dipterum	Arthropoda	Metazoa	0	0	0	0	0	0	0	0	0	0	0	0	0	0	0	0	0	0	0	0	0	0	0	0	0	0	0	0	0	0	0	0	0	0	0	0	0	0	0	0	1	0	0	0	0
A0A922L8C0	UP000790347	Dermatophagoides farinae	Arthropoda	Metazoa	0	0	0	0	0	0	0	0	0	0	0	0	0	0	0	0	0	0	0	0	0	0	0	0	0	0	0	0	0	0	0	0	0	0	0	0	0	0	0	0	0	0	0	0	0
A0A814U365	UP000663828	Adineta ricciae	Rotifera	Metazoa	0	0	0	0	0	0	0	0	0	0	0	0	0	0	0	0	0	0	0	0	0	0	0	0	0	0	0	0	0	0	0	0	0	0	0	0	0	0	0	0	1	0	0	0	0
A0A8R2JVQ0	UP000007819	Acyrthosiphon pisum	Arthropoda	Metazoa	0	0	0	0	0	0	0	0	0	0	0	0	0	0	0	0	0	0	0	0	0	0	0	0	0	0	0	0	0	0	0	0	0	0	0	0	0	0	0	0	0	0	0	0	0
A0A922HY15	UP000790347	Dermatophagoides farinae	Arthropoda	Metazoa	0	0	0	0	0	0	0	0	0	0	0	0	0	0	0	0	0	0	0	0	0	0	0	0	0	0	0	0	0	0	0	0	0	0	0	0	0	0	0	0	0	0	0	0	0
A0A922L3G5	UP000790347	Dermatophagoides farinae	Arthropoda	Metazoa	0	0	0	0	0	0	0	0	0	0	0	0	0	0	0	0	0	0	0	0	0	0	0	0	0	0	0	0	0	0	0	0	0	0	0	0	0	0	0	0	0	0	0	0	0
A0A7M7M985	UP000594260	Varroa destructor	Arthropoda	Metazoa	0	0	0	0	0	0	0	0	0	0	0	0	0	0	0	0	0	0	0	0	0	0	0	0	0	0	0	0	0	0	0	0	0	0	0	0	0	0	0	0	0	0	0	0	0
G0P592	UP000008068	Caenorhabditis brenneri	Nematoda	Metazoa	0	0	0	0	0	0	0	0	0	0	0	0	0	0	0	0	0	0	0	0	0	0	0	0	0	0	0	0	0	0	0	0	0	0	0	0	0	0	0	0	0	0	0	0	0
A0A8J2RNF1	UP000789390	Daphnia galeata	Arthropoda	Metazoa	0	0	0	0	0	0	0	0	0	0	0	0	0	0	0	0	0	0	0	0	0	0	0	0	0	0	0	0	0	0	0	0	0	0	0	0	0	0	0	0	0	0	0	0	0
E3MC51	UP000008281	Caenorhabditis remanei	Nematoda	Metazoa	0	0	0	0	0	0	0	0	0	0	0	0	0	0	0	0	0	0	0	0	0	0	0	0	0	0	0	0	0	0	0	0	0	0	0	0	0	0	0	0	0	0	0	0	0
A0A1Y1KES2	UP000327044	Photinus pyralis	Arthropoda	Metazoa	0	0	0	0	0	0	0	0	0	0	0	0	0	0	0	0	0	0	0	0	0	0	0	0	0	0	0	0	0	0	0	0	0	0	0	0	0	0	0	0	0	0	0	0	0
T1JQ50	UP000015104	Tetranychus urticae	Arthropoda	Metazoa	0	0	0	0	0	0	0	0	0	0	0	0	0	0	0	0	0	0	0	0	0	0	0	0	0	0	0	0	0	0	0	0	0	0	0	0	0	0	0	0	0	0	0	0	0
W2SH21	UP000053676	Necator americanus	Nematoda	Metazoa	0	0	0	0	0	0	0	0	0	0	0	0	0	0	0	0	0	0	0	0	0	0	0	0	0	0	0	0	0	0	0	0	0	0	0	0	0	0	0	0	0	0	0	0	0
A0AA39IJU4	UP001175271	Steinernema hermaphroditum	Nematoda	Metazoa	0	0	0	0	0	0	0	0	0	0	0	0	0	0	0	0	0	0	0	0	0	0	0	0	0	0	0	0	0	0	0	0	0	0	0	0	0	0	0	0	0	0	0	0	0
A0A915A3R0	UP000887569	Parascaris univalens	Nematoda	Metazoa	0	0	0	0	0	0	0	0	0	0	0	0	0	0	0	0	0	0	0	0	0	0	0	0	0	0	0	0	0	0	0	0	0	0	0	0	0	0	0	0	0	0	0	0	0
A0A8T3DBG5	UP000829720	Albula goreensis	Chordata	Metazoa	0	0	0	0	0	0	0	0	0	0	0	0	0	0	0	0	0	0	0	0	0	0	0	0	0	0	0	0	0	0	0	0	0	0	0	0	0	0	0	0	0	0	0	0	0
A0A915AMV0	UP000887569	Parascaris univalens	Nematoda	Metazoa	0	0	0	0	0	0	0	0	0	0	0	0	0	0	0	0	0	0	0	0	0	0	0	0	0	0	0	0	0	0	0	0	0	0	0	0	0	0	0	0	0	0	0	0	0
A0A4V3SAU7	UP000310200	Temnothorax longispinosus	Arthropoda	Metazoa	0	0	0	0	0	0	0	0	0	0	0	0	0	0	0	0	0	0	0	0	0	0	0	0	0	0	0	0	0	0	0	0	0	0	0	0	0	0	0	0	0	0	0	0	0
A0A2G5SXL0	UP000230233	Caenorhabditis nigoni	Nematoda	Metazoa	0	0	0	0	0	0	0	0	0	0	0	0	0	0	0	0	0	0	0	0	0	0	0	0	0	0	0	0	0	0	0	0	0	0	0	0	0	0	0	0	0	0	0	0	0
A0A813S789	UP000663828	Adineta ricciae	Rotifera	Metazoa	0	0	0	0	0	0	0	0	0	0	0	0	0	0	0	0	0	0	0	0	0	0	0	0	0	0	0	0	0	0	0	0	0	0	0	0	0	0	0	0	0	0	0	0	0
A0A1D1W3D7	UP000186922	Ramazzottius varieornatus	Tardigrada	Metazoa	0	0	0	0	0	0	0	0	0	0	0	0	0	0	0	0	0	0	0	0	0	0	0	0	0	0	0	0	0	0	0	0	0	0	0	0	0	0	0	0	0	0	0	0	0
A0AA88T1C7	UP001187315	Tachysurus vachellii	Chordata	Metazoa	0	0	0	0	0	0	0	0	0	0	0	0	0	0	0	0	0	0	0	0	0	0	0	0	0	0	0	0	0	0	0	0	0	0	0	0	0	0	0	0	0	0	0	0	0
A0A9P0J7V9	UP001154329	Aphis gossypii	Arthropoda	Metazoa	0	0	0	0	0	0	0	0	0	0	0	0	0	0	0	0	0	0	0	0	0	0	0	0	0	0	0	0	0	0	0	0	0	0	0	0	0	0	0	0	0	0	0	0	0
A0AA88NHV2	UP001187315	Tachysurus vachellii	Chordata	Metazoa	0	0	0	0	0	0	0	0	0	0	0	0	0	0	0	0	0	0	0	0	0	0	0	0	0	0	0	0	0	0	0	0	0	0	0	0	0	0	0	0	0	0	0	0	0
T1KX74	UP000015104	Tetranychus urticae	Arthropoda	Metazoa	0	0	0	0	0	0	0	0	0	0	0	0	0	0	0	0	0	0	0	0	0	0	0	0	0	0	0	0	0	0	0	0	0	0	0	0	0	0	0	0	0	0	0	0	0
A0A820ZCU8	UP000663873	Rotaria socialis	Rotifera	Metazoa	0	0	0	0	0	0	0	0	0	0	0	0	0	0	0	0	0	0	0	0	0	0	0	0	0	0	0	0	0	0	0	0	0	0	0	0	0	0	0	0	0	0	0	0	0
A0A821HD19	UP000663884	Rotaria sp. Silwood2	Rotifera	Metazoa	0	0	0	0	0	0	0	0	0	0	0	0	0	0	0	0	0	0	0	0	0	0	0	0	0	0	0	0	0	0	0	0	0	0	0	0	0	0	0	0	0	0	0	0	0
A0AA36FQJ6	UP001177023	Mesorhabditis spiculigera	Nematoda	Metazoa	0	0	0	0	0	0	0	0	0	0	0	0	0	0	0	0	0	0	0	0	0	0	0	0	0	0	0	0	0	0	0	0	0	0	0	0	0	0	0	0	0	0	0	0	0
G0MDY5	UP000008068	Caenorhabditis brenneri	Nematoda	Metazoa	0	0	0	0	0	0	0	0	0	0	0	0	0	0	0	0	0	0	0	0	0	0	0	0	0	0	0	0	0	0	0	0	0	0	0	0	0	0	0	0	0	0	0	0	0
A0AAF3FMN6	UP000887575	Mesorhabditis belari	Nematoda	Metazoa	0	0	0	0	0	0	0	0	0	0	0	0	0	0	0	0	0	0	0	0	0	0	0	0	0	0	0	0	0	0	0	0	0	0	0	0	0	0	0	0	0	0	0	0	0
A0A4Y2PAB5	UP000499080	Araneus ventricosus	Arthropoda	Metazoa	0	0	0	0	0	0	0	0	0	0	0	0	0	0	0	0	0	0	0	0	0	0	0	0	0	0	0	0	0	0	0	0	0	0	0	0	0	0	0	0	0	0	0	0	0
A0A819KAJ9	UP000663884	Rotaria sp. Silwood2	Rotifera	Metazoa	0	0	0	0	0	0	0	0	0	0	0	0	0	0	0	0	0	0	0	0	0	0	0	0	0	0	0	0	0	0	0	0	0	0	0	0	0	0	0	0	0	0	0	0	0
A0A820DNA2	UP000663884	Rotaria sp. Silwood2	Rotifera	Metazoa	0	0	0	0	0	0	0	0	0	0	0	0	0	0	0	0	0	0	0	0	0	0	0	0	0	0	0	0	0	0	0	0	0	0	0	0	0	0	0	0	0	0	0	0	0
A0A9Q0RSA2	UP001142055	Blomia tropicalis	Arthropoda	Metazoa	0	0	0	0	0	0	0	0	0	0	0	0	0	0	0	0	0	0	0	0	0	0	0	0	0	0	0	0	0	0	0	0	0	0	0	0	0	0	0	0	0	0	0	0	0
H3C8Q8	UP000007303	Tetraodon nigroviridis	Chordata	Metazoa	0	0	0	0	0	0	0	0	0	0	0	0	0	0	0	0	0	0	0	0	0	0	0	0	0	0	0	0	0	0	0	0	0	0	0	0	0	0	0	0	0	0	0	0	0
A0AA39H6X0	UP001175271	Steinernema hermaphroditum	Nematoda	Metazoa	0	0	0	0	0	0	0	0	0	0	0	0	0	0	0	0	0	0	0	0	0	0	0	0	0	0	0	0	0	0	0	0	0	0	0	0	0	0	0	0	0	0	0	0	0
A0AAF3F423	UP000887575	Mesorhabditis belari	Nematoda	Metazoa	0	0	0	0	0	0	0	0	0	0	0	0	0	0	0	0	0	0	0	0	0	0	0	0	0	0	0	0	0	0	0	0	0	0	0	0	0	0	0	0	0	0	0	0	0
A0A8R1IQD2	UP000005237	Caenorhabditis japonica	Nematoda	Metazoa	0	0	0	0	0	0	0	0	0	0	0	0	0	0	0	0	0	0	0	0	0	0	0	0	0	0	0	0	0	0	0	0	0	0	0	0	0	0	0	0	0	0	0	0	0
A0AA39GVL8	UP001175271	Steinernema hermaphroditum	Nematoda	Metazoa	0	0	0	0	0	0	0	0	0	0	0	0	0	0	0	0	0	0	0	0	0	0	0	0	0	0	0	0	0	0	0	0	0	0	0	0	0	0	0	0	0	0	0	0	0
A0A8R1IFN1	UP000005237	Caenorhabditis japonica	Nematoda	Metazoa	0	0	0	0	0	0	0	0	0	0	0	0	0	0	0	0	0	0	0	0	0	0	0	0	0	0	0	0	0	0	0	0	0	0	0	0	0	0	0	0	0	0	0	0	0
A0A2G5TDX5	UP000230233	Caenorhabditis nigoni	Nematoda	Metazoa	0	0	0	0	0	0	0	0	0	0	0	0	0	0	0	0	0	0	0	0	0	0	0	0	0	0	0	0	0	0	0	0	0	0	0	0	0	0	0	0	0	0	0	0	0
G0P3R6	UP000008068	Caenorhabditis brenneri	Nematoda	Metazoa	0	0	0	0	0	0	0	0	0	0	0	0	0	0	0	0	0	0	0	0	0	0	0	0	0	0	0	0	0	0	0	0	0	0	0	0	0	0	0	0	0	0	0	0	0
A0A915A844	UP000887569	Parascaris univalens	Nematoda	Metazoa	0	0	0	0	0	0	0	0	0	0	0	0	0	0	0	0	0	0	0	0	0	0	0	0	0	0	0	0	0	0	0	0	0	0	0	0	0	0	0	0	0	0	0	0	0
A0A820W511	UP000663884	Rotaria sp. Silwood2	Rotifera	Metazoa	0	0	0	0	0	0	0	0	0	0	0	0	0	0	0	0	0	0	0	0	0	0	0	0	0	0	0	0	0	0	0	0	0	0	0	0	0	0	0	0	0	0	0	0	0
A0A8S1FDC2	UP000494206	Caenorhabditis bovis	Nematoda	Metazoa	0	0	0	0	0	0	0	0	0	0	0	0	0	0	0	0	0	0	0	0	0	0	0	0	0	0	0	0	0	0	0	0	0	0	0	0	0	0	0	0	0	0	0	0	0
G0NI22	UP000008068	Caenorhabditis brenneri	Nematoda	Metazoa	0	0	0	0	0	0	0	0	0	0	0	0	0	0	0	0	0	0	0	0	0	0	0	0	0	0	0	0	0	0	0	0	0	0	0	0	0	0	0	0	0	0	0	0	0
A0A7R9QZ03	UP000728032	Oppiella nova	Arthropoda	Metazoa	0	0	0	0	0	0	0	0	0	0	0	0	0	0	0	0	0	0	0	0	0	0	0	0	0	0	0	0	0	0	0	0	0	0	0	0	0	0	0	0	0	0	0	0	0
A0A3M7PSB0	UP000276133	Brachionus plicatilis	Rotifera	Metazoa	0	0	0	0	0	0	0	0	0	0	0	0	0	0	0	0	0	0	0	0	0	0	0	0	0	0	0	0	0	0	0	0	0	0	0	0	0	0	0	0	0	0	0	0	0
A0A4V3SAB9	UP000310200	Temnothorax longispinosus	Arthropoda	Metazoa	0	0	0	0	0	0	0	0	0	0	0	0	0	0	0	0	0	0	0	0	0	0	0	0	0	0	0	0	0	0	0	0	0	0	0	0	0	0	0	0	0	0	1	0	0
A0A815V6K7	UP000663832	Adineta steineri	Rotifera	Metazoa	0	0	0	0	0	0	0	0	0	0	0	0	0	0	0	0	0	0	0	0	0	0	0	0	0	0	0	0	0	0	0	0	0	0	0	0	0	0	0	0	0	0	0	0	0
A0A8J2M5N5	UP000746747	Cercopithifilaria johnstoni	Nematoda	Metazoa	0	0	0	0	0	0	0	0	0	0	0	0	0	0	0	0	0	0	0	0	0	0	0	0	0	0	0	0	0	0	0	0	0	0	0	0	0	0	0	0	0	0	0	0	0
A0A7M7KN59	UP000594260	Varroa destructor	Arthropoda	Metazoa	0	0	0	0	0	0	0	0	0	0	0	0	0	0	0	0	0	0	0	0	0	0	0	0	0	0	0	0	0	0	0	0	0	0	0	0	0	0	0	0	0	0	0	0	0
A0A8C8K0X3	UP000694402	Oncorhynchus tshawytscha	Chordata	Metazoa	0	0	0	0	0	0	0	0	0	0	0	0	0	0	0	0	0	0	0	0	0	0	0	0	0	0	0	0	0	0	0	0	0	0	0	0	0	0	0	0	0	0	0	0	0
A0A1V4L160	UP000190648	Patagioenas fasciata	Chordata	Metazoa	0	0	0	0	0	0	0	0	0	0	0	0	0	0	0	0	0	0	0	0	0	0	0	0	0	0	0	0	0	0	0	0	0	0	0	0	0	0	0	0	0	0	0	0	0
A0A8R1TMB6	UP000024404	Onchocerca volvulus	Nematoda	Metazoa	0	0	0	0	0	0	0	0	0	0	0	0	0	0	0	0	0	0	0	0	0	0	0	0	0	0	0	0	0	0	0	0	0	0	0	0	0	0	0	0	0	0	0	0	0
A0A8S9WKE3	UP000466442	Apolygus lucorum	Arthropoda	Metazoa	0	0	0	0	0	0	0	0	0	0	0	0	0	0	0	0	0	0	0	0	0	0	0	0	0	0	0	0	0	0	0	0	0	0	0	0	0	0	0	0	0	0	0	0	0
G0P1I4	UP000008068	Caenorhabditis brenneri	Nematoda	Metazoa	0	0	0	0	0	0	0	0	0	0	0	0	0	0	0	0	0	0	0	0	0	0	0	0	0	0	0	0	0	0	0	0	0	0	0	0	0	0	0	0	0	0	0	0	0
A0A821UTS5	UP000663873	Rotaria socialis	Rotifera	Metazoa	0	0	0	0	0	0	0	0	0	0	0	0	0	0	0	0	0	0	0	0	0	0	0	0	0	0	0	0	0	0	0	0	0	0	0	0	0	0	0	0	0	0	0	0	0
A0A819UHB6	UP000663866	Rotaria magnacalcarata	Rotifera	Metazoa	0	0	0	0	0	0	0	0	0	0	0	0	0	0	0	0	0	0	0	0	0	0	0	0	0	0	0	0	0	0	0	0	0	0	0	0	0	0	0	0	0	0	0	0	0
A0A2A2KDL4	UP000218231	Diploscapter pachys	Nematoda	Metazoa	0	0	0	0	0	0	0	0	0	0	0	0	0	0	0	0	0	0	0	0	0	0	0	0	0	0	0	0	0	0	0	0	0	0	0	0	0	0	0	0	0	0	0	0	0
A0A2G5SDP6	UP000230233	Caenorhabditis nigoni	Nematoda	Metazoa	0	0	0	0	0	0	0	0	0	0	0	0	0	0	0	0	0	0	0	0	0	0	0	0	0	0	0	0	0	0	0	0	0	0	0	0	0	0	0	0	0	0	0	0	0
A0A821GRV4	UP000663884	Rotaria sp. Silwood2	Rotifera	Metazoa	0	0	0	0	0	0	0	0	0	0	0	0	0	0	0	0	0	0	0	0	0	0	0	0	0	0	0	0	0	0	0	0	0	0	0	0	0	0	0	0	0	0	0	0	0
A0A6A5EKD3	UP000465112	Perca fluviatilis	Chordata	Metazoa	0	0	0	0	0	0	0	0	0	0	0	0	0	0	0	0	0	0	0	0	0	0	0	0	0	0	0	0	0	0	0	0	0	0	0	0	0	0	0	0	0	0	0	0	0
A0A2G5SXS8	UP000230233	Caenorhabditis nigoni	Nematoda	Metazoa	0	0	0	0	0	0	0	0	0	0	0	0	0	0	0	0	0	0	0	0	0	0	0	0	0	0	0	0	0	0	0	0	0	0	0	0	0	0	0	0	0	0	0	0	0
G0P108	UP000008068	Caenorhabditis brenneri	Nematoda	Metazoa	0	0	0	0	0	0	0	0	0	0	0	0	0	0	0	0	0	0	0	0	0	0	0	0	0	0	0	0	0	0	0	0	0	0	0	0	0	0	0	0	0	0	0	0	0
A0A7J5ZNS3	UP000593565	Ameiurus melas	Chordata	Metazoa	0	0	0	0	0	0	0	0	0	0	0	0	0	0	0	0	0	0	0	0	0	0	0	0	0	0	0	0	0	0	0	0	0	0	0	0	0	0	0	0	0	0	0	0	0
A0A2G5SDP0	UP000230233	Caenorhabditis nigoni	Nematoda	Metazoa	0	0	0	0	0	0	0	0	0	0	0	0	0	0	0	0	0	0	0	0	0	0	0	0	0	0	0	0	0	0	0	0	0	0	0	0	0	0	0	0	0	0	0	0	0
A0A820UES4	UP000663866	Rotaria magnacalcarata	Rotifera	Metazoa	0	0	0	0	0	0	0	0	0	0	0	0	0	0	0	0	0	0	0	0	0	0	0	0	0	0	0	0	0	0	0	0	0	0	0	0	0	0	0	0	0	0	0	0	0
A0A7J5ZNW5	UP000593565	Ameiurus melas	Chordata	Metazoa	0	0	0	0	0	0	0	0	0	0	0	0	0	0	0	0	0	0	0	0	0	0	0	0	0	0	0	0	0	0	0	0	0	0	0	0	0	0	0	0	0	0	0	0	0
A0A8R2JLM3	UP000007819	Acyrthosiphon pisum	Arthropoda	Metazoa	0	0	0	0	0	0	0	0	0	0	0	0	0	0	0	0	0	0	0	0	0	0	0	0	0	0	0	0	0	0	0	0	0	0	0	0	0	0	0	0	0	0	0	0	0
A0A2G5SCK1	UP000230233	Caenorhabditis nigoni	Nematoda	Metazoa	0	0	0	0	0	0	0	0	0	0	0	0	0	0	0	0	0	0	0	0	0	0	0	0	0	0	0	0	0	0	0	0	0	0	0	0	0	0	0	0	0	0	0	0	0
A0A9J6CMQ0	UP001107558	Polypedilum vanderplanki	Arthropoda	Metazoa	0	0	0	0	0	0	0	0	0	0	0	0	0	0	0	0	0	0	0	0	0	0	0	0	0	0	0	0	0	0	0	0	0	0	0	0	0	0	0	0	0	0	0	0	0
A0A2G5SVW5	UP000230233	Caenorhabditis nigoni	Nematoda	Metazoa	0	0	0	0	0	0	0	0	0	0	0	0	0	0	0	0	0	0	0	0	0	0	0	0	0	0	0	0	0	0	0	0	0	0	0	0	0	0	0	0	0	0	0	0	0
A0A821DKN3	UP000663873	Rotaria socialis	Rotifera	Metazoa	0	0	0	0	0	0	0	0	0	0	0	0	0	0	0	0	0	0	0	0	0	0	0	0	0	0	0	0	0	0	0	0	0	0	0	0	0	0	0	0	0	0	0	0	0
A0A2A2KU89	UP000218231	Diploscapter pachys	Nematoda	Metazoa	0	0	0	0	0	0	0	0	0	0	0	0	0	0	0	0	0	0	0	0	0	0	0	0	0	0	0	0	0	0	0	0	0	0	0	0	0	0	0	0	0	0	0	0	0
A0A7J5ZL67	UP000593565	Ameiurus melas	Chordata	Metazoa	0	0	0	0	0	0	0	0	0	0	0	0	0	0	0	0	0	0	0	0	0	0	0	0	0	0	0	0	0	0	0	0	0	0	0	0	0	0	0	0	0	0	0	0	0
G0NQB0	UP000008068	Caenorhabditis brenneri	Nematoda	Metazoa	0	0	0	0	0	0	0	0	0	0	0	0	0	0	0	0	0	0	0	0	0	0	0	0	0	0	0	0	0	0	0	0	0	0	0	0	0	0	0	0	0	0	0	0	0
A0A815A7C5	UP000663829	Didymodactylos carnosus	Rotifera	Metazoa	0	0	0	0	0	0	0	0	0	0	0	0	0	0	0	0	0	0	0	0	0	0	0	0	0	0	0	0	0	0	0	0	0	0	0	0	0	0	0	0	0	0	0	0	0
A0A2G5TV45	UP000230233	Caenorhabditis nigoni	Nematoda	Metazoa	0	0	0	0	0	0	0	0	0	0	0	0	0	0	0	0	0	0	0	0	0	0	0	0	0	0	0	0	0	0	0	0	0	0	0	0	0	0	0	0	0	0	0	0	0
G0PG59	UP000008068	Caenorhabditis brenneri	Nematoda	Metazoa	0	0	0	0	0	0	0	0	0	0	0	0	0	0	0	0	0	0	0	0	0	0	0	0	0	0	0	0	0	0	0	0	0	0	0	0	0	0	0	0	0	0	0	0	0
A0A8R1EHM2	UP000005237	Caenorhabditis japonica	Nematoda	Metazoa	0	0	0	0	0	0	0	0	0	0	0	0	0	0	0	0	0	0	0	0	0	0	0	0	0	0	0	0	0	0	0	0	0	0	0	0	0	0	0	0	0	0	0	0	0
A0A834XPB7	UP000639338	Aphidius gifuensis	Arthropoda	Metazoa	0	0	0	0	0	0	0	0	0	0	0	0	0	0	0	0	0	0	0	0	0	0	0	0	0	0	0	0	0	0	0	0	0	0	0	0	0	0	0	0	0	0	0	0	0
A0A1D1W6G1	UP000186922	Ramazzottius varieornatus	Tardigrada	Metazoa	0	0	0	0	0	0	0	0	0	0	0	0	0	0	0	0	0	0	0	0	0	0	0	0	0	0	0	0	0	0	0	0	0	0	0	0	0	0	0	0	0	0	0	0	0
A0A1D1W2N8	UP000186922	Ramazzottius varieornatus	Tardigrada	Metazoa	0	0	0	0	0	0	0	0	0	0	0	0	0	0	0	0	0	0	0	0	0	0	0	0	0	0	0	0	0	0	0	0	0	0	0	0	0	0	0	0	0	0	0	0	0
A0A1D1W9K8	UP000186922	Ramazzottius varieornatus	Tardigrada	Metazoa	0	0	0	0	0	0	0	0	0	0	0	0	0	0	0	0	0	0	0	0	0	0	0	0	0	0	0	0	0	0	0	0	0	0	0	0	0	0	0	0	0	0	0	0	0
W2SIK8	UP000053676	Necator americanus	Nematoda	Metazoa	0	0	0	0	0	0	0	0	0	0	0	0	0	0	0	0	0	0	0	0	0	0	0	0	0	0	0	0	0	0	0	0	0	0	0	0	0	0	0	0	0	0	0	0	0
A0A8R1EWA4	UP000005237	Caenorhabditis japonica	Nematoda	Metazoa	0	0	0	0	0	0	0	0	0	0	0	0	0	0	0	0	0	0	0	0	0	0	0	0	0	0	0	0	0	0	0	0	0	0	0	0	0	0	0	0	0	0	0	0	0
G0NST0	UP000008068	Caenorhabditis brenneri	Nematoda	Metazoa	0	0	0	0	0	0	0	0	0	0	0	0	0	0	0	0	0	0	0	0	0	0	0	0	0	0	0	0	0	0	0	0	0	0	0	0	0	0	0	0	0	0	0	0	0
A0A2G5SWA5	UP000230233	Caenorhabditis nigoni	Nematoda	Metazoa	0	0	0	0	0	0	0	0	0	0	0	0	0	0	0	0	0	0	0	0	0	0	0	0	0	0	0	0	0	0	0	0	0	0	0	0	0	0	0	0	0	0	0	0	0
A0A7J5ZHW7	UP000593565	Ameiurus melas	Chordata	Metazoa	0	0	0	0	0	0	0	0	0	0	0	0	0	0	0	0	0	0	0	0	0	0	0	0	0	0	0	0	0	0	0	0	0	0	0	0	0	0	0	0	0	0	0	0	0
A0A821VP10	UP000663873	Rotaria socialis	Rotifera	Metazoa	0	0	0	0	0	0	0	0	0	0	0	0	0	0	0	0	0	0	0	0	0	0	0	0	0	0	0	0	0	0	0	0	0	0	0	0	0	0	0	0	0	0	0	0	0
E3MP54	UP000008281	Caenorhabditis remanei	Nematoda	Metazoa	0	0	0	0	0	0	0	0	0	0	0	0	0	0	0	0	0	0	0	0	0	0	0	0	0	0	0	0	0	0	0	0	0	0	0	0	0	0	0	0	0	0	0	0	0
A0AA36G010	UP001177023	Mesorhabditis spiculigera	Nematoda	Metazoa	0	0	0	0	0	0	0	0	0	0	0	0	0	0	0	0	0	0	0	0	0	0	0	0	0	0	0	0	0	0	0	0	0	0	0	0	0	0	0	0	0	0	0	0	0
A0A261BJG9	UP000216463	Caenorhabditis latens	Nematoda	Metazoa	0	0	0	0	0	0	0	0	0	0	0	0	0	0	0	0	0	0	0	0	0	0	0	0	0	0	0	0	0	0	0	0	0	0	0	0	0	0	0	0	2	0	0	0	0
A0A817CW52	UP000663884	Rotaria sp. Silwood2	Rotifera	Metazoa	0	0	0	0	0	0	0	0	0	0	0	0	0	0	0	0	0	0	0	0	0	0	0	0	0	0	0	0	0	0	0	0	0	0	0	0	0	0	0	0	0	0	0	0	0
A0A261AV09	UP000216463	Caenorhabditis latens	Nematoda	Metazoa	0	0	0	0	0	0	0	0	0	0	0	0	0	0	0	0	0	0	0	0	0	0	0	0	0	0	0	0	0	0	0	0	0	0	0	0	0	0	0	0	1	0	0	0	0
A0A498SEY1	UP000276991	Acanthocheilonema viteae	Nematoda	Metazoa	0	0	0	0	0	0	0	0	0	0	0	0	0	0	0	0	0	0	0	0	0	0	0	0	0	0	0	0	0	0	0	0	0	0	0	0	0	0	0	0	1	0	0	0	0
A0A261BVU5	UP000216463	Caenorhabditis latens	Nematoda	Metazoa	0	0	0	0	0	0	0	0	0	0	0	0	0	0	0	0	0	0	0	0	0	0	0	0	0	0	0	0	0	0	0	0	0	0	0	0	0	0	0	0	0	0	0	0	0
A0A0P7YK71	UP000034805	Scleropages formosus	Chordata	Metazoa	0	0	0	0	0	0	0	0	0	0	0	0	0	0	0	0	0	0	0	0	0	0	0	0	0	0	0	0	0	0	0	0	0	0	0	0	0	0	0	0	0	0	0	0	0
A0A6L2QB24	UP000502823	Coptotermes formosanus	Arthropoda	Metazoa	0	0	0	0	0	0	0	0	0	0	0	0	0	0	0	0	0	0	0	0	0	0	0	0	0	0	0	0	0	0	0	0	0	0	0	0	0	0	0	0	1	0	0	0	0
A0A5E4QJ04	UP000324832	Leptidea sinapis	Arthropoda	Metazoa	0	0	0	0	0	0	0	0	0	0	0	0	0	0	0	0	0	0	0	0	0	0	0	0	0	0	0	0	0	0	0	0	0	0	0	0	0	0	0	0	1	0	0	0	0
A0A261C1Y5	UP000216463	Caenorhabditis latens	Nematoda	Metazoa	0	0	0	0	0	0	0	0	0	0	0	0	0	0	0	0	0	0	0	0	0	0	0	0	0	0	0	0	0	0	0	0	0	0	0	0	0	0	0	0	1	0	0	0	0
A0A261BP18	UP000216463	Caenorhabditis latens	Nematoda	Metazoa	0	0	0	0	0	0	0	0	0	0	0	0	0	0	0	0	0	0	0	0	0	0	0	0	0	0	0	0	0	0	0	0	0	0	0	0	0	0	0	0	1	0	0	0	0
A0A261CL04	UP000216463	Caenorhabditis latens	Nematoda	Metazoa	0	0	0	0	0	0	0	0	0	0	0	0	0	0	0	0	0	0	0	0	0	0	0	0	0	0	0	0	0	0	0	0	0	0	0	0	0	0	0	0	1	0	0	0	0
A0A7R9MIV7	UP000728032	Oppiella nova	Arthropoda	Metazoa	0	0	0	0	0	0	0	0	0	0	0	0	0	0	0	0	0	0	0	0	0	0	0	0	0	0	0	0	0	0	0	0	0	0	0	0	0	0	0	0	0	0	0	0	0
A0A815DEG2	UP000663829	Didymodactylos carnosus	Rotifera	Metazoa	0	0	0	0	0	0	0	0	0	0	0	0	0	0	0	0	0	0	0	0	0	0	0	0	0	0	0	0	0	0	0	0	0	0	0	0	0	0	0	0	0	0	0	0	0
A0A7R9QQW8	UP000728032	Oppiella nova	Arthropoda	Metazoa	0	0	0	0	0	0	0	0	0	0	0	0	0	0	0	0	0	0	0	0	0	0	0	0	0	0	0	0	0	0	0	0	0	0	0	0	0	0	0	0	0	0	0	0	0
A0A5E4PYM4	UP000324832	Leptidea sinapis	Arthropoda	Metazoa	0	0	0	0	0	0	0	0	0	0	0	0	0	0	0	0	0	0	0	0	0	0	0	0	0	0	0	0	0	0	0	0	0	0	0	0	0	0	0	0	1	0	0	0	0
A0A820RI85	UP000663866	Rotaria magnacalcarata	Rotifera	Metazoa	0	0	0	0	0	0	0	0	0	0	0	0	0	0	0	0	0	0	0	0	0	0	0	0	0	0	0	0	0	0	0	0	0	0	0	0	0	0	0	0	0	0	0	0	0
A0A6L2PT51	UP000502823	Coptotermes formosanus	Arthropoda	Metazoa	0	0	0	0	0	0	0	0	0	0	0	0	0	0	0	0	0	0	0	0	0	0	0	0	0	0	0	0	0	0	0	0	0	0	0	0	0	0	0	0	1	0	0	0	0
A0A267FAW8	UP000215902	Macrostomum lignano	Platyhelminthes	Metazoa	0	0	0	0	0	0	0	0	0	0	0	0	0	0	0	0	0	0	0	0	0	0	0	0	0	0	0	0	0	0	0	0	0	0	0	0	0	0	0	0	0	0	0	0	0
A0A261BJK7	UP000216463	Caenorhabditis latens	Nematoda	Metazoa	0	0	0	0	0	0	0	0	0	0	0	0	0	0	0	0	0	0	0	0	0	0	0	0	0	0	0	0	0	0	0	0	0	0	0	0	0	0	0	0	1	0	0	0	0
A0A261C7S3	UP000216463	Caenorhabditis latens	Nematoda	Metazoa	0	0	0	0	0	0	0	0	0	0	0	0	0	0	0	0	0	0	0	0	0	0	0	0	0	0	0	0	0	0	0	0	0	0	0	0	0	0	0	0	1	0	0	0	0
A0A814HTP9	UP000663829	Didymodactylos carnosus	Rotifera	Metazoa	0	0	0	0	0	0	0	0	0	0	0	0	0	0	0	0	0	0	0	0	0	0	0	0	0	0	0	0	0	0	0	0	0	0	0	0	0	0	0	0	0	0	0	0	0
A0A261C7P7	UP000216463	Caenorhabditis latens	Nematoda	Metazoa	0	0	0	0	0	0	0	0	0	0	0	0	0	0	0	0	0	0	0	0	0	0	0	0	0	0	0	0	0	0	0	0	0	0	0	0	0	0	0	0	1	0	0	0	0
A0A261CEH9	UP000216463	Caenorhabditis latens	Nematoda	Metazoa	0	0	0	0	0	0	0	0	0	0	0	0	0	0	0	0	0	0	0	0	0	0	0	0	0	0	0	0	0	0	0	0	0	0	0	0	0	0	0	0	1	0	0	0	0
A0A260ZS81	UP000216463	Caenorhabditis latens	Nematoda	Metazoa	0	0	0	0	0	0	0	0	0	0	0	0	0	0	0	0	0	0	0	0	0	0	0	0	0	0	0	0	0	0	0	0	0	0	0	0	0	0	0	0	1	0	0	0	0
A0A261AG67	UP000216463	Caenorhabditis latens	Nematoda	Metazoa	0	0	0	0	0	0	0	0	0	0	0	0	0	0	0	0	0	0	0	0	0	0	0	0	0	0	0	0	0	0	0	0	0	0	0	0	0	0	0	0	0	0	0	0	0
A0A815PBI7	UP000663832	Adineta steineri	Rotifera	Metazoa	0	0	0	0	0	0	0	0	0	0	0	0	0	0	0	0	0	0	0	0	0	0	0	0	0	0	0	0	0	0	0	0	0	0	0	0	0	0	0	0	0	0	0	0	0
A0A261CHL7	UP000216463	Caenorhabditis latens	Nematoda	Metazoa	0	0	0	0	0	0	0	0	0	0	0	0	0	0	0	0	0	0	0	0	0	0	0	0	0	0	0	0	0	0	0	0	0	0	0	0	0	0	0	0	0	0	0	0	0
A0A261CPL5	UP000216463	Caenorhabditis latens	Nematoda	Metazoa	0	0	0	0	0	0	0	0	0	0	0	0	0	0	0	0	0	0	0	0	0	0	0	0	0	0	0	0	0	0	0	0	0	0	0	0	0	0	0	0	0	0	0	0	0
A0A261BS48	UP000216463	Caenorhabditis latens	Nematoda	Metazoa	0	0	0	0	0	0	0	0	0	0	0	0	0	0	0	0	0	0	0	0	0	0	0	0	0	0	0	0	0	0	0	0	0	0	0	0	0	0	0	0	1	0	0	0	0
A0AA36D7A3	UP001177023	Mesorhabditis spiculigera	Nematoda	Metazoa	0	0	0	0	0	0	0	0	0	0	0	0	0	0	0	0	0	0	0	0	0	0	0	0	0	0	0	0	0	0	0	0	0	0	0	0	0	0	0	0	0	0	0	0	0
A0AA36FSK8	UP001177023	Mesorhabditis spiculigera	Nematoda	Metazoa	0	0	0	0	0	0	0	0	0	0	0	0	0	0	0	0	0	0	0	0	0	0	0	0	0	0	0	0	0	0	0	0	0	0	0	0	0	0	0	0	0	0	0	0	0
A0A5E4R0I1	UP000324832	Leptidea sinapis	Arthropoda	Metazoa	0	0	0	0	0	0	0	0	0	0	0	0	0	0	0	0	0	0	0	0	0	0	0	0	0	0	0	0	0	0	0	0	0	0	0	0	0	0	0	0	1	0	0	0	0
A0A261A4W5	UP000216463	Caenorhabditis latens	Nematoda	Metazoa	0	0	0	0	0	0	0	0	0	0	0	0	0	0	0	0	0	0	0	0	0	0	0	0	0	0	0	0	0	0	0	0	0	0	0	0	0	0	0	0	0	0	0	0	0
A0A261BRU6	UP000216463	Caenorhabditis latens	Nematoda	Metazoa	0	0	0	0	0	0	0	0	0	0	0	0	0	0	0	0	0	0	0	0	0	0	0	0	0	0	0	0	0	0	0	0	0	0	0	0	0	0	0	0	1	0	0	0	0
A0A260Z7Y6	UP000216463	Caenorhabditis latens	Nematoda	Metazoa	0	0	0	0	0	0	0	0	0	0	0	0	0	0	0	0	0	0	0	0	0	0	0	0	0	0	0	0	0	0	0	0	0	0	0	0	0	0	0	0	1	0	0	0	0
A0A261CCC8	UP000216463	Caenorhabditis latens	Nematoda	Metazoa	0	0	0	0	0	0	0	0	0	0	0	0	0	0	0	0	0	0	0	0	0	0	0	0	0	0	0	0	0	0	0	0	0	0	0	0	0	0	0	0	1	0	0	0	0
A0A7R9QM62	UP000759131	Medioppia subpectinata	Arthropoda	Metazoa	0	0	0	0	0	0	0	0	0	0	0	0	0	0	0	0	0	0	0	0	0	0	0	0	0	0	0	0	0	0	0	0	0	0	0	0	0	0	0	0	0	0	0	0	0
A0A7R9MN47	UP000728032	Oppiella nova	Arthropoda	Metazoa	0	0	0	0	0	0	0	0	0	0	0	0	0	0	0	0	0	0	0	0	0	0	0	0	0	0	0	0	0	0	0	0	0	0	0	0	0	0	0	0	0	0	0	0	0
A0A821JRS7	UP000663884	Rotaria sp. Silwood2	Rotifera	Metazoa	0	0	0	0	0	0	0	0	0	0	0	0	0	0	0	0	0	0	0	0	0	0	0	0	0	0	0	0	0	0	0	0	0	0	0	0	0	0	0	0	0	0	0	0	0
A0AA36G5Z2	UP001177023	Mesorhabditis spiculigera	Nematoda	Metazoa	0	0	0	0	0	0	0	0	0	0	0	0	0	0	0	0	0	0	0	0	0	0	0	0	0	0	0	0	0	0	0	0	0	0	0	0	0	0	0	0	1	0	0	0	0
A0AA36D0R5	UP001177023	Mesorhabditis spiculigera	Nematoda	Metazoa	0	0	0	0	0	0	0	0	0	0	0	0	0	0	0	0	0	0	0	0	0	0	0	0	0	0	0	0	0	0	0	0	0	0	0	0	0	0	0	0	0	0	0	0	0
A0A815ADT9	UP000663829	Didymodactylos carnosus	Rotifera	Metazoa	0	0	0	0	0	0	0	0	0	0	0	0	0	0	0	0	0	0	0	0	0	0	0	0	0	0	0	0	0	0	0	0	0	0	0	0	0	0	0	0	0	0	0	0	0
A0A2A6BNM6	UP000005239	Pristionchus pacificus	Nematoda	Metazoa	0	0	0	0	0	0	0	0	0	0	0	0	0	0	0	0	0	0	0	0	0	0	0	0	0	0	0	0	0	0	0	0	0	0	0	0	0	0	0	0	0	0	0	0	0
A0AA36GG36	UP001177023	Mesorhabditis spiculigera	Nematoda	Metazoa	0	0	0	0	0	0	0	0	0	0	0	0	0	0	0	0	0	0	0	0	0	0	0	0	0	0	0	0	0	0	0	0	0	0	0	0	0	0	0	0	0	0	0	0	0
A0A261CUM0	UP000216463	Caenorhabditis latens	Nematoda	Metazoa	0	0	0	0	0	0	0	0	0	0	0	0	0	0	0	0	0	0	0	0	0	0	0	0	0	0	0	0	0	0	0	0	0	0	0	0	0	0	0	0	1	0	0	0	0
A0A261AE48	UP000216463	Caenorhabditis latens	Nematoda	Metazoa	0	0	0	0	0	0	0	0	0	0	0	0	0	0	0	0	0	0	0	0	0	0	0	0	0	0	0	0	0	0	0	0	0	0	0	0	0	0	0	0	1	0	0	0	0
A0A261BX87	UP000216463	Caenorhabditis latens	Nematoda	Metazoa	0	0	0	0	0	0	0	0	0	0	0	0	0	0	0	0	0	0	0	0	0	0	0	0	0	0	0	0	0	0	0	0	0	0	0	0	0	0	0	0	1	0	0	0	0
A0AA36DK87	UP001177023	Mesorhabditis spiculigera	Nematoda	Metazoa	0	0	0	0	0	0	0	0	0	0	0	0	0	0	0	0	0	0	0	0	0	0	0	0	0	0	0	0	0	0	0	0	0	0	0	0	0	0	0	0	1	0	0	0	0
A0AA36D408	UP001177023	Mesorhabditis spiculigera	Nematoda	Metazoa	0	0	0	0	0	0	0	0	0	0	0	0	0	0	0	0	0	0	0	0	0	0	0	0	0	0	0	0	0	0	0	0	0	0	0	0	0	0	0	0	1	0	0	0	0
A0AA36DHU5	UP001177023	Mesorhabditis spiculigera	Nematoda	Metazoa	0	0	0	0	0	0	0	0	0	0	0	0	0	0	0	0	0	0	0	0	0	0	0	0	0	0	0	0	0	0	0	0	0	0	0	0	0	0	0	0	1	0	0	0	0
A0A821B586	UP000663884	Rotaria sp. Silwood2	Rotifera	Metazoa	0	0	0	0	0	0	0	0	0	0	0	0	0	0	0	0	0	0	0	0	0	0	0	0	0	0	0	0	0	0	0	0	0	0	0	0	0	0	0	0	0	0	0	0	0
A0A261B3D5	UP000216463	Caenorhabditis latens	Nematoda	Metazoa	0	0	0	0	0	0	0	0	0	0	0	0	0	0	0	0	0	0	0	0	0	0	0	0	0	0	0	0	0	0	0	0	0	0	0	0	0	0	0	0	1	0	0	0	0
A0A261C4X4	UP000216463	Caenorhabditis latens	Nematoda	Metazoa	0	0	0	0	0	0	0	0	0	0	0	0	0	0	0	0	0	0	0	0	0	0	0	0	0	0	0	0	0	0	0	0	0	0	0	0	0	0	0	0	1	0	0	0	0
A0AA36CS54	UP001177023	Mesorhabditis spiculigera	Nematoda	Metazoa	0	0	0	0	0	0	0	0	0	0	0	0	0	0	0	0	0	0	0	0	0	0	0	0	0	0	0	0	0	0	0	0	0	0	0	0	0	0	0	0	0	0	0	0	0
A0A261BGN3	UP000216463	Caenorhabditis latens	Nematoda	Metazoa	0	0	0	0	0	0	0	0	0	0	0	0	0	0	0	0	0	0	0	0	0	0	0	0	0	0	0	0	0	0	0	0	0	0	0	0	0	0	0	0	0	0	0	0	0
T1H8B3	UP000015103	Rhodnius prolixus	Arthropoda	Metazoa	0	0	0	0	0	0	0	0	0	0	0	0	0	0	0	0	0	0	0	0	0	0	0	0	0	0	0	0	0	0	0	0	0	0	0	0	0	0	0	0	1	0	0	0	0
A0A261BUQ9	UP000216463	Caenorhabditis latens	Nematoda	Metazoa	0	0	0	0	0	0	0	0	0	0	0	0	0	0	0	0	0	0	0	0	0	0	0	0	0	0	0	0	0	0	0	0	0	0	0	0	0	0	0	0	0	0	0	0	0
A0AA36CSV4	UP001177023	Mesorhabditis spiculigera	Nematoda	Metazoa	0	0	0	0	0	0	0	0	0	0	0	0	0	0	0	0	0	0	0	0	0	0	0	0	0	0	0	0	0	0	0	0	0	0	0	0	0	0	0	0	1	0	0	0	0
A0A261BS09	UP000216463	Caenorhabditis latens	Nematoda	Metazoa	0	0	0	0	0	0	0	0	0	0	0	0	0	0	0	0	0	0	0	0	0	0	0	0	0	0	0	0	0	0	0	0	0	0	0	0	0	0	0	0	0	0	0	0	0
A0AA36GEW3	UP001177023	Mesorhabditis spiculigera	Nematoda	Metazoa	0	0	0	0	0	0	0	0	0	0	0	0	0	0	0	0	0	0	0	0	0	0	0	0	0	0	0	0	0	0	0	0	0	0	0	0	0	0	0	0	0	0	0	0	0
A0A261BR74	UP000216463	Caenorhabditis latens	Nematoda	Metazoa	0	0	0	0	0	0	0	0	0	0	0	0	0	0	0	0	0	0	0	0	0	0	0	0	0	0	0	0	0	0	0	0	0	0	0	0	0	0	0	0	0	0	0	0	0
A0A821K9K5	UP000663873	Rotaria socialis	Rotifera	Metazoa	0	0	0	0	0	0	0	0	0	0	0	0	0	0	0	0	0	0	0	0	0	0	0	0	0	0	0	0	0	0	0	0	0	0	0	0	0	0	0	0	0	0	0	0	0
A0A0Q9X3N3	UP000007798	Drosophila willistoni	Arthropoda	Metazoa	0	0	0	0	0	0	0	0	0	0	0	0	0	0	0	0	0	0	0	0	0	0	0	0	0	0	0	0	0	0	0	0	0	0	0	0	0	0	0	0	1	0	0	0	0
T1HEI8	UP000015103	Rhodnius prolixus	Arthropoda	Metazoa	0	0	0	0	0	0	0	0	0	0	0	0	0	0	0	0	0	0	0	0	0	0	0	0	0	0	0	0	0	0	0	0	0	0	0	0	0	0	0	0	1	0	0	0	0
A0A261B278	UP000216463	Caenorhabditis latens	Nematoda	Metazoa	0	0	0	0	0	0	0	0	0	0	0	0	0	0	0	0	0	0	0	0	0	0	0	0	0	0	0	0	0	0	0	0	0	0	0	0	0	0	0	0	1	0	0	0	0
A0A3M6U2M9	UP000275408	Pocillopora damicornis	Cnidaria	Metazoa	0	0	0	0	0	0	0	0	0	0	0	0	0	0	0	0	0	0	0	0	0	0	0	0	0	0	0	0	0	0	0	0	0	0	0	0	0	0	0	0	0	0	0	0	0
A0AA36DG58	UP001177023	Mesorhabditis spiculigera	Nematoda	Metazoa	0	0	0	0	0	0	0	0	0	0	0	0	0	0	0	0	0	0	0	0	0	0	0	0	0	0	0	0	0	0	0	0	0	0	0	0	0	0	0	0	1	0	0	0	0
A0AA36GBM3	UP001177023	Mesorhabditis spiculigera	Nematoda	Metazoa	0	0	0	0	0	0	0	0	0	0	0	0	0	0	0	0	0	0	0	0	0	0	0	0	0	0	0	0	0	0	0	0	0	0	0	0	0	0	0	0	1	0	0	0	0
A0AA36GCX1	UP001177023	Mesorhabditis spiculigera	Nematoda	Metazoa	0	0	0	0	0	0	0	0	0	0	0	0	0	0	0	0	0	0	0	0	0	0	0	0	0	0	0	0	0	0	0	0	0	0	0	0	0	0	0	0	0	0	0	0	0
A0A498SI18	UP000276991	Acanthocheilonema viteae	Nematoda	Metazoa	0	0	0	0	0	0	0	0	0	0	0	0	0	0	0	0	0	0	0	0	0	0	0	0	0	0	0	0	0	0	0	0	0	0	0	0	0	0	0	0	0	0	0	0	0
A0A821PGZ0	UP000663873	Rotaria socialis	Rotifera	Metazoa	0	0	0	0	0	0	0	0	0	0	0	0	0	0	0	0	0	0	0	0	0	0	0	0	0	0	0	0	0	0	0	0	0	0	0	0	0	0	0	0	0	0	0	0	0
A7T7C9	UP000001593	Nematostella vectensis	Cnidaria	Metazoa	0	0	0	0	0	0	0	0	0	0	0	0	0	0	0	0	0	0	0	0	0	0	0	0	0	0	0	0	0	0	0	0	0	0	0	0	0	0	0	0	0	0	0	0	0
A0A443S1J1	UP000288716	Leptotrombidium deliense	Arthropoda	Metazoa	0	0	0	0	0	0	0	0	0	0	0	0	0	0	0	0	0	0	0	0	0	0	0	0	0	0	0	0	0	0	0	0	0	0	0	0	0	0	0	0	0	0	0	0	0
A0A7R9LZ55	UP000759131	Medioppia subpectinata	Arthropoda	Metazoa	0	0	0	0	0	0	0	0	0	0	0	0	0	0	0	0	0	0	0	0	0	0	0	0	0	0	0	0	0	0	0	0	0	0	0	0	0	0	0	0	0	0	0	0	0
A0A7R9LY71	UP000759131	Medioppia subpectinata	Arthropoda	Metazoa	0	0	0	0	0	0	0	0	0	0	0	0	0	0	0	0	0	0	0	0	0	0	0	0	0	0	0	0	0	0	0	0	0	0	0	0	0	0	0	0	0	0	0	0	0
A0A816B610	UP000663829	Didymodactylos carnosus	Rotifera	Metazoa	0	0	0	0	0	0	0	0	0	0	0	0	0	0	0	0	0	0	0	0	0	0	0	0	0	0	0	0	0	0	0	0	0	0	0	0	0	0	0	0	0	0	0	0	0
A0AA36G0T2	UP001177023	Mesorhabditis spiculigera	Nematoda	Metazoa	0	0	0	0	0	0	0	0	0	0	0	0	0	0	0	0	0	0	0	0	0	0	0	0	0	0	0	0	0	0	0	0	0	0	0	0	0	0	0	0	0	0	0	0	0
A0A821NMW7	UP000663884	Rotaria sp. Silwood2	Rotifera	Metazoa	0	0	0	0	0	0	0	0	0	0	0	0	0	0	0	0	0	0	0	0	0	0	0	0	0	0	0	0	0	0	0	0	0	0	0	0	0	0	0	0	0	0	0	0	0
A0A0Q9XHK4	UP000009192	Drosophila mojavensis	Arthropoda	Metazoa	0	0	0	0	0	0	0	0	0	0	0	0	0	0	0	0	0	0	0	0	0	0	0	0	0	0	0	0	0	0	0	0	0	0	0	0	0	0	0	0	0	0	0	0	0
W2SIT7	UP000053676	Necator americanus	Nematoda	Metazoa	0	0	0	0	0	0	0	0	0	0	0	0	0	0	0	0	0	0	0	0	0	0	0	0	0	0	0	0	0	0	0	0	0	0	0	0	0	0	0	0	0	0	0	0	0
A0A261CKR1	UP000216463	Caenorhabditis latens	Nematoda	Metazoa	0	0	0	0	0	0	0	0	0	0	0	0	0	0	0	0	0	0	0	0	0	0	0	0	0	0	0	0	0	0	0	0	0	0	0	0	0	0	0	0	0	0	0	0	0
A0A498STN2	UP000276991	Acanthocheilonema viteae	Nematoda	Metazoa	0	0	0	0	0	0	0	0	0	0	0	0	0	0	0	0	0	0	0	0	0	0	0	0	0	0	0	0	0	0	0	0	0	0	0	0	0	0	0	0	1	0	0	0	0
A0A814S8H9	UP000663879	Brachionus calyciflorus	Rotifera	Metazoa	0	0	0	0	0	0	0	0	0	0	0	0	0	0	0	0	0	0	0	0	0	0	0	0	0	0	0	0	0	0	0	0	0	0	0	0	0	0	0	0	0	0	0	0	0
A0A261B204	UP000216463	Caenorhabditis latens	Nematoda	Metazoa	0	0	0	0	0	0	0	0	0	0	0	0	0	0	0	0	0	0	0	0	0	0	0	0	0	0	0	0	0	0	0	0	0	0	0	0	0	0	0	0	0	0	0	0	0
A7T755	UP000001593	Nematostella vectensis	Cnidaria	Metazoa	0	0	0	0	0	0	0	0	0	0	0	0	0	0	0	0	0	0	0	0	0	0	0	0	0	0	0	0	0	0	0	0	0	0	0	0	0	0	0	0	0	0	0	0	0
A0A484AS30	UP000295192	Drosophila navojoa	Arthropoda	Metazoa	0	0	0	0	0	0	0	0	0	0	0	0	0	0	0	0	0	0	0	0	0	0	0	0	0	0	0	0	0	0	0	0	0	0	0	0	0	0	0	0	0	0	0	0	0
A0A821QN49	UP000663873	Rotaria socialis	Rotifera	Metazoa	0	0	0	0	0	0	0	0	0	0	0	0	0	0	0	0	0	0	0	0	0	0	0	0	0	0	0	0	0	0	0	0	0	0	0	0	0	0	0	0	0	0	0	0	0
A0A261BYF9	UP000216463	Caenorhabditis latens	Nematoda	Metazoa	0	0	0	0	0	0	0	0	0	0	0	0	0	0	0	0	0	0	0	0	0	0	0	0	0	0	0	0	0	0	0	0	0	0	0	0	0	0	0	0	0	0	0	0	0
A0A443RU99	UP000288716	Leptotrombidium deliense	Arthropoda	Metazoa	0	0	0	0	0	0	0	0	0	0	0	0	0	0	0	0	0	0	0	0	0	0	0	0	0	0	0	0	0	0	0	0	0	0	0	0	0	0	0	0	0	0	0	0	0
A0A815Y290	UP000663829	Didymodactylos carnosus	Rotifera	Metazoa	0	0	0	0	0	0	0	0	0	0	0	0	0	0	0	0	0	0	0	0	0	0	0	0	0	0	0	0	0	0	0	0	0	0	0	0	0	0	0	0	0	0	0	0	0
A0A261BVI7	UP000216463	Caenorhabditis latens	Nematoda	Metazoa	0	0	0	0	0	0	0	0	0	0	0	0	0	0	0	0	0	0	0	0	0	0	0	0	0	0	0	0	0	0	0	0	0	0	0	0	0	0	0	0	0	0	0	0	0
A0A821E9Y1	UP000663866	Rotaria magnacalcarata	Rotifera	Metazoa	0	0	0	0	0	0	0	0	0	0	0	0	0	0	0	0	0	0	0	0	0	0	0	0	0	0	0	0	0	0	0	0	0	0	0	0	0	0	0	0	0	0	0	0	0
A0A5E4MII2	UP000325440	Cinara cedri	Arthropoda	Metazoa	0	0	0	0	0	0	0	0	0	0	0	0	0	0	0	0	0	0	0	0	0	0	0	0	0	0	0	0	0	0	0	0	0	0	0	0	0	0	0	0	0	0	0	0	0
A0A5E4LZ61	UP000325440	Cinara cedri	Arthropoda	Metazoa	0	0	0	0	0	0	0	0	0	0	0	0	0	0	0	0	0	0	0	0	0	0	0	0	0	0	0	0	0	0	0	0	0	0	0	0	0	0	0	0	1	0	0	0	0
A0A5E4MQU0	UP000325440	Cinara cedri	Arthropoda	Metazoa	0	0	0	0	0	0	0	0	0	0	0	0	0	0	0	0	0	0	0	0	0	0	0	0	0	0	0	0	0	0	0	0	0	0	0	0	0	0	0	0	1	0	0	0	0
A0A5E4MA08	UP000325440	Cinara cedri	Arthropoda	Metazoa	0	0	0	0	0	0	0	0	0	0	0	0	0	0	0	0	0	0	0	0	0	0	0	0	0	0	0	0	0	0	0	0	0	0	0	0	0	0	0	0	1	0	0	0	0
A0A5E4MQP0	UP000325440	Cinara cedri	Arthropoda	Metazoa	0	0	0	0	0	0	0	0	0	0	0	0	0	0	0	0	0	0	0	0	0	0	0	0	0	0	0	0	0	0	0	0	0	0	0	0	0	0	0	0	1	0	0	0	0
A0A8C0JB21	UP000694404	Chelonoidis abingdonii	Chordata	Metazoa	0	0	0	0	0	0	0	0	0	0	0	0	0	0	0	0	0	0	0	0	0	0	0	0	0	0	0	0	0	0	0	0	0	0	0	0	0	0	0	0	1	0	0	0	0
A0A674K7G0	UP000472274	Terrapene triunguis	Chordata	Metazoa	0	0	0	0	0	0	0	0	0	0	0	0	0	0	0	0	0	0	0	0	0	0	0	0	0	0	0	0	0	0	0	0	0	0	0	0	0	0	0	0	1	0	0	0	0
G3RI55	UP000001519	Gorilla gorilla	Chordata	Metazoa	0	0	0	0	0	0	0	0	0	0	0	0	0	0	0	0	0	0	0	0	0	0	0	0	0	0	0	0	0	0	0	0	0	0	0	0	0	0	0	0	1	0	0	0	0
A0A2K5JMW7	UP000233080	Colobus angolensis	Chordata	Metazoa	0	0	0	0	0	0	0	0	0	0	0	0	0	0	0	0	0	0	0	0	0	0	0	0	0	0	0	0	0	0	0	0	0	0	0	0	0	0	0	0	1	0	0	0	0
A0A2K6JPH8	UP000233180	Rhinopithecus bieti	Chordata	Metazoa	0	0	0	0	0	0	0	0	0	0	0	0	0	0	0	0	0	0	0	0	0	0	0	0	0	0	0	0	0	0	0	0	0	0	0	0	0	0	0	0	1	0	0	0	0
A0A2K6P951	UP000233200	Rhinopithecus roxellana	Chordata	Metazoa	0	0	0	0	0	0	0	0	0	0	0	0	0	0	0	0	0	0	0	0	0	0	0	0	0	0	0	0	0	0	0	0	0	0	0	0	0	0	0	0	1	0	0	0	0
A0A096N174	UP000028761	Papio anubis	Chordata	Metazoa	0	0	0	0	0	0	0	0	0	0	0	0	0	0	0	0	0	0	0	0	0	0	0	0	0	0	0	0	0	0	0	0	0	0	0	0	0	0	0	0	1	0	0	0	0
A0A8D2GEW4	UP000694411	Theropithecus gelada	Chordata	Metazoa	0	0	0	0	0	0	0	0	0	0	0	0	0	0	0	0	0	0	0	0	0	0	0	0	0	0	0	0	0	0	0	0	0	0	0	0	0	0	0	0	1	0	0	0	0
A0A7N9CKW3	UP000233100	Macaca fascicularis	Chordata	Metazoa	0	0	0	0	0	0	0	0	0	0	0	0	0	0	0	0	0	0	0	0	0	0	0	0	0	0	0	0	0	0	0	0	0	0	0	0	0	0	0	0	1	0	0	0	0
A0A2K6E924	UP000233120	Macaca nemestrina	Chordata	Metazoa	0	0	0	0	0	0	0	0	0	0	0	0	0	0	0	0	0	0	0	0	0	0	0	0	0	0	0	0	0	0	0	0	0	0	0	0	0	0	0	0	1	0	0	0	0
A0A2K5M4Z5	UP000233060	Cercocebus atys	Chordata	Metazoa	0	0	0	0	0	0	0	0	0	0	0	0	0	0	0	0	0	0	0	0	0	0	0	0	0	0	0	0	0	0	0	0	0	0	0	0	0	0	0	0	1	0	0	0	0
A0A2K5Z5K0	UP000233140	Mandrillus leucophaeus	Chordata	Metazoa	0	0	0	0	0	0	0	0	0	0	0	0	0	0	0	0	0	0	0	0	0	0	0	0	0	0	0	0	0	0	0	0	0	0	0	0	0	0	0	0	1	0	0	0	0
A0A8C9G997	UP000694416	Piliocolobus tephrosceles	Chordata	Metazoa	0	0	0	0	0	0	0	0	0	0	0	0	0	0	0	0	0	0	0	0	0	0	0	0	0	0	0	0	0	0	0	0	0	0	0	0	0	0	0	0	1	0	0	0	0
A0A7N4PHJ0	UP000007648	Sarcophilus harrisii	Chordata	Metazoa	0	0	0	0	0	0	0	0	0	0	0	0	0	0	0	0	0	0	0	0	0	0	0	0	0	0	0	0	0	0	0	0	0	0	0	0	0	0	0	0	1	0	0	0	0
A0A667HMJ6	UP000472241	Lynx canadensis	Chordata	Metazoa	0	0	0	0	0	0	0	0	0	0	0	0	0	0	0	0	0	0	0	0	0	0	0	0	0	0	0	0	0	0	0	0	0	0	0	0	0	0	0	0	1	0	0	0	0
A0A8C6DJK3	UP000694544	Moschus moschiferus	Chordata	Metazoa	0	0	0	0	0	0	0	0	0	0	0	0	0	0	0	0	0	0	0	0	0	0	0	0	0	0	0	0	0	0	0	0	0	0	0	0	0	0	0	0	1	0	0	0	0
A0A8C8XFF7	UP000694399	Panthera leo	Chordata	Metazoa	0	0	0	0	0	0	0	0	0	0	0	0	0	0	0	0	0	0	0	0	0	0	0	0	0	0	0	0	0	0	0	0	0	0	0	0	0	0	0	0	1	0	0	0	0
A0A8C9J378	UP000675900	Panthera tigris	Chordata	Metazoa	0	0	0	0	0	0	0	0	0	0	0	0	0	0	0	0	0	0	0	0	0	0	0	0	0	0	0	0	0	0	0	0	0	0	0	0	0	0	0	0	1	0	0	0	0
A0A0D9S5H9	UP000029965	Chlorocebus sabaeus	Chordata	Metazoa	0	0	0	0	0	0	0	0	0	0	0	0	0	0	0	0	0	0	0	0	0	0	0	0	0	0	0	0	0	0	0	0	0	0	0	0	0	0	0	0	1	0	0	0	0
F7GRR2	UP000008225	Callithrix jacchus	Chordata	Metazoa	0	0	0	0	0	0	0	0	0	0	0	0	0	0	0	0	0	0	0	0	0	0	0	0	0	0	0	0	0	0	0	0	0	0	0	0	0	0	0	0	1	0	0	0	0
G3TC21	UP000007646	Loxodonta africana	Chordata	Metazoa	0	0	0	0	0	0	0	0	0	0	0	0	0	0	0	0	0	0	0	0	0	0	0	0	0	0	0	0	0	0	0	0	0	0	0	0	0	0	0	0	1	0	0	0	0
A0A7J7R510	UP000527355	Myotis myotis	Chordata	Metazoa	0	0	0	0	0	0	0	0	0	0	0	0	0	0	0	0	0	0	0	0	0	0	0	0	0	0	0	0	0	0	0	0	0	0	0	0	0	0	0	0	1	0	0	0	0
A0A2K5S8N6	UP000233040	Cebus imitator	Chordata	Metazoa	0	0	0	0	0	0	0	0	0	0	0	0	0	0	0	0	0	0	0	0	0	0	0	0	0	0	0	0	0	0	0	0	0	0	0	0	0	0	0	0	1	0	0	0	0
A0A452DY38	UP000291000	Capra hircus	Chordata	Metazoa	0	0	0	0	0	0	0	0	0	0	0	0	0	0	0	0	0	0	0	0	0	0	0	0	0	0	0	0	0	0	0	0	0	0	0	0	0	0	0	0	1	0	0	0	0
A0A4W2EJ42	UP000314981	Bos indicus x Bos taurus	Chordata	Metazoa	0	0	0	0	0	0	0	0	0	0	0	0	0	0	0	0	0	0	0	0	0	0	0	0	0	0	0	0	0	0	0	0	0	0	0	0	0	0	0	0	1	0	0	0	0
A0A8B9X352	UP000694520	Bos grunniens	Chordata	Metazoa	0	0	0	0	0	0	0	0	0	0	0	0	0	0	0	0	0	0	0	0	0	0	0	0	0	0	0	0	0	0	0	0	0	0	0	0	0	0	0	0	1	0	0	0	0
A0A8C0KFG4	UP000694391	Canis lupus	Chordata	Metazoa	0	0	0	0	0	0	0	0	0	0	0	0	0	0	0	0	0	0	0	0	0	0	0	0	0	0	0	0	0	0	0	0	0	0	0	0	0	0	0	0	1	0	0	0	0
A0A8C4M7Z4	UP000694387	Equus asinus	Chordata	Metazoa	0	0	0	0	0	0	0	0	0	0	0	0	0	0	0	0	0	0	0	0	0	0	0	0	0	0	0	0	0	0	0	0	0	0	0	0	0	0	0	0	1	0	0	0	0
H0XD65	UP000005225	Otolemur garnettii	Chordata	Metazoa	0	0	0	0	0	0	0	0	0	0	0	0	0	0	0	0	0	0	0	0	0	0	0	0	0	0	0	0	0	0	0	0	0	0	0	0	0	0	0	0	1	0	0	0	0
E2RDI9	UP000805418	Canis lupus	Chordata	Metazoa	0	0	0	0	0	0	0	0	0	0	0	0	0	0	0	0	0	0	0	0	0	0	0	0	0	0	0	0	0	0	0	0	0	0	0	0	0	0	0	0	1	0	0	0	0
A0A8C3VS10	UP000694540	Catagonus wagneri	Chordata	Metazoa	0	0	0	0	0	0	0	0	0	0	0	0	0	0	0	0	0	0	0	0	0	0	0	0	0	0	0	0	0	0	0	0	0	0	0	0	0	0	0	0	1	0	0	0	0
G1TP64	UP000001811	Oryctolagus cuniculus	Chordata	Metazoa	0	0	0	0	0	0	0	0	0	0	0	0	0	0	0	0	0	0	0	0	0	0	0	0	0	0	0	0	0	0	0	0	0	0	0	0	0	0	0	0	1	0	0	0	0
A0A2K5CU01	UP000233020	Aotus nancymaae	Chordata	Metazoa	0	0	0	0	0	0	0	0	0	0	0	0	0	0	0	0	0	0	0	0	0	0	0	0	0	0	0	0	0	0	0	0	0	0	0	0	0	0	0	0	1	0	0	0	0
A0A8C7BUS2	UP000694425	Neogale vison	Chordata	Metazoa	0	0	0	0	0	0	0	0	0	0	0	0	0	0	0	0	0	0	0	0	0	0	0	0	0	0	0	0	0	0	0	0	0	0	0	0	0	0	0	0	1	0	0	0	0
M3XYQ8	UP000000715	Mustela putorius	Chordata	Metazoa	0	0	0	0	0	0	0	0	0	0	0	0	0	0	0	0	0	0	0	0	0	0	0	0	0	0	0	0	0	0	0	0	0	0	0	0	0	0	0	0	1	0	0	0	0
A0A8C5LF87	UP000694385	Jaculus jaculus	Chordata	Metazoa	0	0	0	0	0	0	0	0	0	0	0	0	0	0	0	0	0	0	0	0	0	0	0	0	0	0	0	0	0	0	0	0	0	0	0	0	0	0	0	0	1	0	0	0	0
A0A384BXX6	UP000261680	Ursus maritimus	Chordata	Metazoa	0	0	0	0	0	0	0	0	0	0	0	0	0	0	0	0	0	0	0	0	0	0	0	0	0	0	0	0	0	0	0	0	0	0	0	0	0	0	0	0	1	0	0	0	0
A0A8D2AZS1	UP000694564	Sciurus vulgaris	Chordata	Metazoa	0	0	0	0	0	0	0	0	0	0	0	0	0	0	0	0	0	0	0	0	0	0	0	0	0	0	0	0	0	0	0	0	0	0	0	0	0	0	0	0	1	0	0	0	0
I3M5L1	UP000005215	Ictidomys tridecemlineatus	Chordata	Metazoa	0	0	0	0	0	0	0	0	0	0	0	0	0	0	0	0	0	0	0	0	0	0	0	0	0	0	0	0	0	0	0	0	0	0	0	0	0	0	0	0	1	0	0	0	0
A0A8D2HPJ7	UP000694417	Urocitellus parryii	Chordata	Metazoa	0	0	0	0	0	0	0	0	0	0	0	0	0	0	0	0	0	0	0	0	0	0	0	0	0	0	0	0	0	0	0	0	0	0	0	0	0	0	0	0	1	0	0	0	0
A0A8C2VC79	UP000694398	Chinchilla lanigera	Chordata	Metazoa	0	0	0	0	0	0	0	0	0	0	0	0	0	0	0	0	0	0	0	0	0	0	0	0	0	0	0	0	0	0	0	0	0	0	0	0	0	0	0	0	1	0	0	0	0
A0A2K6UPL2	UP000233220	Saimiri boliviensis	Chordata	Metazoa	0	0	0	0	0	0	0	0	0	0	0	0	0	0	0	0	0	0	0	0	0	0	0	0	0	0	0	0	0	0	0	0	0	0	0	0	0	0	0	0	1	0	0	0	0
A0A7J8H4S3	UP000593571	Rousettus aegyptiacus	Chordata	Metazoa	0	0	0	0	0	0	0	0	0	0	0	0	0	0	0	0	0	0	0	0	0	0	0	0	0	0	0	0	0	0	0	0	0	0	0	0	0	0	0	0	1	0	0	0	0
A0A673VRR8	UP000472268	Suricata suricatta	Chordata	Metazoa	0	0	0	0	0	0	0	0	0	0	0	0	0	0	0	0	0	0	0	0	0	0	0	0	0	0	0	0	0	0	0	0	0	0	0	0	0	0	0	0	1	0	0	0	0
A0A7J8BZ85	UP000550707	Molossus molossus	Chordata	Metazoa	0	0	0	0	0	0	0	0	0	0	0	0	0	0	0	0	0	0	0	0	0	0	0	0	0	0	0	0	0	0	0	0	0	0	0	0	0	0	0	0	1	0	0	0	0
A0A670JWS5	UP000472272	Podarcis muralis	Chordata	Metazoa	0	0	0	0	0	0	0	0	0	0	0	0	0	0	0	0	0	0	0	0	0	0	0	0	0	0	0	0	0	0	0	0	0	0	0	0	0	0	0	0	1	0	0	0	0
H0V419	UP000005447	Cavia porcellus	Chordata	Metazoa	0	0	0	0	0	0	0	0	0	0	0	0	0	0	0	0	0	0	0	0	0	0	0	0	0	0	0	0	0	0	0	0	0	0	0	0	0	0	0	0	1	0	0	0	0
A0A672UWR2	UP000472266	Strigops habroptila	Chordata	Metazoa	0	0	0	0	0	0	0	0	0	0	0	0	0	0	0	0	0	0	0	0	0	0	0	0	0	0	0	0	0	0	0	0	0	0	0	0	0	0	0	0	1	0	0	0	0
A0A8C9ALT3	UP000694414	Prolemur simus	Chordata	Metazoa	0	0	0	0	0	0	0	0	0	0	0	0	0	0	0	0	0	0	0	0	0	0	0	0	0	0	0	0	0	0	0	0	0	0	0	0	0	0	0	0	1	0	0	0	0
A0A8C5VST7	UP000694394	Microcebus murinus	Chordata	Metazoa	0	0	0	0	0	0	0	0	0	0	0	0	0	0	0	0	0	0	0	0	0	0	0	0	0	0	0	0	0	0	0	0	0	0	0	0	0	0	0	0	1	0	0	0	0
A0A6I9KUM6	UP000504601	Peromyscus maniculatus	Chordata	Metazoa	0	0	0	0	0	0	0	0	0	0	0	0	0	0	0	0	0	0	0	0	0	0	0	0	0	0	0	0	0	0	0	0	0	0	0	0	0	0	0	0	1	0	0	0	0
F7BJH1	UP000002279	Ornithorhynchus anatinus	Chordata	Metazoa	0	0	0	0	0	0	0	0	0	0	0	0	0	0	0	0	0	0	0	0	0	0	0	0	0	0	0	0	0	0	0	0	0	0	0	0	0	0	0	0	1	0	0	0	0
A0A8B9CIL9	UP000694426	Anser brachyrhynchus	Chordata	Metazoa	0	0	0	0	0	0	0	0	0	0	0	0	0	0	0	0	0	0	0	0	0	0	0	0	0	0	0	0	0	0	0	0	0	0	0	0	0	0	0	0	1	0	0	0	0
A0A7M4FLE9	UP000594220	Crocodylus porosus	Chordata	Metazoa	0	0	0	0	0	0	0	0	0	0	0	0	0	0	0	0	0	0	0	0	0	0	0	0	0	0	0	0	0	0	0	0	0	0	0	0	0	0	0	0	1	0	0	0	0
A0A671FQN6	UP000472240	Rhinolophus ferrumequinum	Chordata	Metazoa	0	0	0	0	0	0	0	0	0	0	0	0	0	0	0	0	0	0	0	0	0	0	0	0	0	0	0	0	0	0	0	0	0	0	0	0	0	0	0	0	1	0	0	0	0
A0A8C9BXN0	UP000694554	Phocoena sinus	Chordata	Metazoa	0	0	0	0	0	0	0	0	0	0	0	0	0	0	0	0	0	0	0	0	0	0	0	0	0	0	0	0	0	0	0	0	0	0	0	0	0	0	0	0	1	0	0	0	0
A0A8C6RJF2	UP000694381	Nannospalax galili	Chordata	Metazoa	0	0	0	0	0	0	0	0	0	0	0	0	0	0	0	0	0	0	0	0	0	0	0	0	0	0	0	0	0	0	0	0	0	0	0	0	0	0	0	0	1	0	0	0	0
A0A663DQN9	UP000472275	Aquila chrysaetos	Chordata	Metazoa	0	0	0	0	0	0	0	0	0	0	0	0	0	0	0	0	0	0	0	0	0	0	0	0	0	0	0	0	0	0	0	0	0	0	0	0	0	0	0	0	1	0	0	0	0
A0A663MF14	UP000472269	Athene cunicularia	Chordata	Metazoa	0	0	0	0	0	0	0	0	0	0	0	0	0	0	0	0	0	0	0	0	0	0	0	0	0	0	0	0	0	0	0	0	0	0	0	0	0	0	0	0	1	0	0	0	0
A0A670ZV28	UP000472273	Pseudonaja textilis	Chordata	Metazoa	0	0	0	0	0	0	0	0	0	0	0	0	0	0	0	0	0	0	0	0	0	0	0	0	0	0	0	0	0	0	0	0	0	0	0	0	0	0	0	0	1	0	0	0	0
U3IY01	UP000016666	Anas platyrhynchos	Chordata	Metazoa	0	0	0	0	0	0	0	0	0	0	0	0	0	0	0	0	0	0	0	0	0	0	0	0	0	0	0	0	0	0	0	0	0	0	0	0	0	0	0	0	1	0	0	0	0
A0A8C6ZLD4	UP000694420	Nothoprocta perdicaria	Chordata	Metazoa	0	0	0	0	0	0	0	0	0	0	0	0	0	0	0	0	0	0	0	0	0	0	0	0	0	0	0	0	0	0	0	0	0	0	0	0	0	0	0	0	1	0	0	0	0
H9GML7	UP000001646	Anolis carolinensis	Chordata	Metazoa	0	0	0	0	0	0	0	0	0	0	0	0	0	0	0	0	0	0	0	0	0	0	0	0	0	0	0	0	0	0	0	0	0	0	0	0	0	0	0	0	1	0	0	0	0
A0A4W3IZG4	UP000314986	Callorhinchus milii	Chordata	Metazoa	0	0	0	0	0	0	0	0	0	0	0	0	0	0	0	0	0	0	0	0	0	0	0	0	0	0	0	0	0	0	0	0	0	0	0	0	0	0	0	0	1	0	0	0	0
A0A8C2UAS6	UP000694412	Coturnix japonica	Chordata	Metazoa	0	0	0	0	0	0	0	0	0	0	0	0	0	0	0	0	0	0	0	0	0	0	0	0	0	0	0	0	0	0	0	0	0	0	0	0	0	0	0	0	1	0	0	0	0
A0A803Y0D8	UP000001645	Meleagris gallopavo	Chordata	Metazoa	0	0	0	0	0	0	0	0	0	0	0	0	0	0	0	0	0	0	0	0	0	0	0	0	0	0	0	0	0	0	0	0	0	0	0	0	0	0	0	0	1	0	0	0	0
A0A8D0E826	UP000694421	Salvator merianae	Chordata	Metazoa	0	0	0	0	0	0	0	0	0	0	0	0	0	0	0	0	0	0	0	0	0	0	0	0	0	0	0	0	0	0	0	0	0	0	0	0	0	0	0	0	1	0	0	0	0
H9GH46	UP000001646	Anolis carolinensis	Chordata	Metazoa	0	0	0	0	0	0	0	0	0	0	0	0	0	0	0	0	0	0	0	0	0	0	0	0	0	0	0	0	0	0	0	0	0	0	0	0	0	0	0	0	1	0	0	0	0
A0A8C9N823	UP000694409	Serinus canaria	Chordata	Metazoa	0	0	0	0	0	0	0	0	0	0	0	0	0	0	0	0	0	0	0	0	0	0	0	0	0	0	0	0	0	0	0	0	0	0	0	0	0	0	0	0	1	0	0	0	0
A0A674BYF8	UP000472277	Salmo trutta	Chordata	Metazoa	0	0	0	0	0	0	0	0	0	0	0	0	0	0	0	0	0	0	0	0	0	0	0	0	0	0	0	0	0	0	0	0	0	0	0	0	0	0	0	0	1	0	0	0	0
A0A8C8HFT6	UP000694402	Oncorhynchus tshawytscha	Chordata	Metazoa	0	0	0	0	0	0	0	0	0	0	0	0	0	0	0	0	0	0	0	0	0	0	0	0	0	0	0	0	0	0	0	0	0	0	0	0	0	0	0	0	1	0	0	0	0
A0A8C7F1F6	UP000694557	Oncorhynchus kisutch	Chordata	Metazoa	0	0	0	0	0	0	0	0	0	0	0	0	0	0	0	0	0	0	0	0	0	0	0	0	0	0	0	0	0	0	0	0	0	0	0	0	0	0	0	0	1	0	0	0	0
A0A8C0VTG8	UP000694410	Cyanistes caeruleus	Chordata	Metazoa	0	0	0	0	0	0	0	0	0	0	0	0	0	0	0	0	0	0	0	0	0	0	0	0	0	0	0	0	0	0	0	0	0	0	0	0	0	0	0	0	1	0	0	0	0
H0Z300	UP000007754	Taeniopygia guttata	Chordata	Metazoa	0	0	0	0	0	0	0	0	0	0	0	0	0	0	0	0	0	0	0	0	0	0	0	0	0	0	0	0	0	0	0	0	0	0	0	0	0	0	0	0	1	0	0	0	0
U3K4E1	UP000016665	Ficedula albicollis	Chordata	Metazoa	0	0	0	0	0	0	0	0	0	0	0	0	0	0	0	0	0	0	0	0	0	0	0	0	0	0	0	0	0	0	0	0	0	0	0	0	0	0	0	0	1	0	0	0	0
A0A671U9G1	UP000472265	Sparus aurata	Chordata	Metazoa	0	0	0	0	0	0	0	0	0	0	0	0	0	0	0	0	0	0	0	0	0	0	0	0	0	0	0	0	0	0	0	0	0	0	0	0	0	0	0	0	1	0	0	0	0
A0A3P9BPB6	UP000265160	Maylandia zebra	Chordata	Metazoa	0	0	0	0	0	0	0	0	0	0	0	0	0	0	0	0	0	0	0	0	0	0	0	0	0	0	0	0	0	0	0	0	0	0	0	0	0	0	0	0	1	0	0	0	0
A0A8C4YQJ7	UP000694390	Gopherus evgoodei	Chordata	Metazoa	0	0	0	0	0	0	0	0	0	0	0	0	0	0	0	0	0	0	0	0	0	0	0	0	0	0	0	0	0	0	0	0	0	0	0	0	0	0	0	0	1	0	0	0	0
A0A8C4TBM8	UP000694620	Erpetoichthys calabaricus	Chordata	Metazoa	0	0	0	0	0	0	0	0	0	0	0	0	0	0	0	0	0	0	0	0	0	0	0	0	0	0	0	0	0	0	0	0	0	0	0	0	0	0	0	0	1	0	0	0	0
A0A8D0CN75	UP000694568	Sander lucioperca	Chordata	Metazoa	0	0	0	0	0	0	0	0	0	0	0	0	0	0	0	0	0	0	0	0	0	0	0	0	0	0	0	0	0	0	0	0	0	0	0	0	0	0	0	0	1	0	0	0	0
A0A8C6Q916	UP000694548	Nothobranchius furzeri	Chordata	Metazoa	0	0	0	0	0	0	0	0	0	0	0	0	0	0	0	0	0	0	0	0	0	0	0	0	0	0	0	0	0	0	0	0	0	0	0	0	0	0	0	0	1	0	0	0	0
I3JY33	UP000005207	Oreochromis niloticus	Chordata	Metazoa	0	0	0	0	0	0	0	0	0	0	0	0	0	0	0	0	0	0	0	0	0	0	0	0	0	0	0	0	0	0	0	0	0	0	0	0	0	0	0	0	1	0	0	0	0
W5L7R9	UP000018467	Astyanax mexicanus	Chordata	Metazoa	0	0	0	0	0	0	0	0	0	0	0	0	0	0	0	0	0	0	0	0	0	0	0	0	0	0	0	0	0	0	0	0	0	0	0	0	0	0	0	0	1	0	0	0	0
A0A8C6YBR8	UP000694559	Naja naja	Chordata	Metazoa	0	0	0	0	0	0	0	0	0	0	0	0	0	0	0	0	0	0	0	0	0	0	0	0	0	0	0	0	0	0	0	0	0	0	0	0	0	0	0	0	1	0	0	0	0
A0A3Q1EIB0	UP000257200	Acanthochromis polyacanthus	Chordata	Metazoa	0	0	0	0	0	0	0	0	0	0	0	0	0	0	0	0	0	0	0	0	0	0	0	0	0	0	0	0	0	0	0	0	0	0	0	0	0	0	0	0	1	0	0	0	0
W5MGT2	UP000018468	Lepisosteus oculatus	Chordata	Metazoa	0	0	0	0	0	0	0	0	0	0	0	0	0	0	0	0	0	0	0	0	0	0	0	0	0	0	0	0	0	0	0	0	0	0	0	0	0	0	0	0	1	0	0	0	0
A0A3Q1B891	UP000257160	Amphiprion ocellaris	Chordata	Metazoa	0	0	0	0	0	0	0	0	0	0	0	0	0	0	0	0	0	0	0	0	0	0	0	0	0	0	0	0	0	0	0	0	0	0	0	0	0	0	0	0	1	0	0	0	0
A0A668A726	UP000472263	Myripristis murdjan	Chordata	Metazoa	0	0	0	0	0	0	0	0	0	0	0	0	0	0	0	0	0	0	0	0	0	0	0	0	0	0	0	0	0	0	0	0	0	0	0	0	0	0	0	0	1	0	0	0	0
A0A672KUC6	UP000472262	Sinocyclocheilus grahami	Chordata	Metazoa	0	0	0	0	0	0	0	0	0	0	0	0	0	0	0	0	0	0	0	0	0	0	0	0	0	0	0	0	0	0	0	0	0	0	0	0	0	0	0	0	1	0	0	0	0
A0A8C4BYG5	UP000694580	Denticeps clupeoides	Chordata	Metazoa	0	0	0	0	0	0	0	0	0	0	0	0	0	0	0	0	0	0	0	0	0	0	0	0	0	0	0	0	0	0	0	0	0	0	0	0	0	0	0	0	1	0	0	0	0
A0A3Q3GWI1	UP000264800	Kryptolebias marmoratus	Chordata	Metazoa	0	0	0	0	0	0	0	0	0	0	0	0	0	0	0	0	0	0	0	0	0	0	0	0	0	0	0	0	0	0	0	0	0	0	0	0	0	0	0	0	1	0	0	0	0
A0A8P4KP85	UP000694389	Dicentrarchus labrax	Chordata	Metazoa	0	0	0	0	0	0	0	0	0	0	0	0	0	0	0	0	0	0	0	0	0	0	0	0	0	0	0	0	0	0	0	0	0	0	0	0	0	0	0	0	1	0	0	0	0
A0A3P8WC66	UP000265120	Cynoglossus semilaevis	Chordata	Metazoa	0	0	0	0	0	0	0	0	0	0	0	0	0	0	0	0	0	0	0	0	0	0	0	0	0	0	0	0	0	0	0	0	0	0	0	0	0	0	0	0	1	0	0	0	0
A0A3P9MZN9	UP000242638	Poecilia reticulata	Chordata	Metazoa	0	0	0	0	0	0	0	0	0	0	0	0	0	0	0	0	0	0	0	0	0	0	0	0	0	0	0	0	0	0	0	0	0	0	0	0	0	0	0	0	1	0	0	0	0
A0A096LQ55	UP000028760	Poecilia formosa	Chordata	Metazoa	0	0	0	0	0	0	0	0	0	0	0	0	0	0	0	0	0	0	0	0	0	0	0	0	0	0	0	0	0	0	0	0	0	0	0	0	0	0	0	0	1	0	0	0	0
A0A671KF89	UP000472260	Sinocyclocheilus anshuiensis	Chordata	Metazoa	0	0	0	0	0	0	0	0	0	0	0	0	0	0	0	0	0	0	0	0	0	0	0	0	0	0	0	0	0	0	0	0	0	0	0	0	0	0	0	0	1	0	0	0	0
M3ZD26	UP000002852	Xiphophorus maculatus	Chordata	Metazoa	0	0	0	0	0	0	0	0	0	0	0	0	0	0	0	0	0	0	0	0	0	0	0	0	0	0	0	0	0	0	0	0	0	0	0	0	0	0	0	0	1	0	0	0	0
A0A665WN07	UP000472264	Echeneis naucrates	Chordata	Metazoa	0	0	0	0	0	0	0	0	0	0	0	0	0	0	0	0	0	0	0	0	0	0	0	0	0	0	0	0	0	0	0	0	0	0	0	0	0	0	0	0	1	0	0	0	0
A0A8C5I5I1	UP000694680	Gouania willdenowi	Chordata	Metazoa	0	0	0	0	0	0	0	0	0	0	0	0	0	0	0	0	0	0	0	0	0	0	0	0	0	0	0	0	0	0	0	0	0	0	0	0	0	0	0	0	1	0	0	0	0
A0A672JIH6	UP000472267	Salarias fasciatus	Chordata	Metazoa	0	0	0	0	0	0	0	0	0	0	0	0	0	0	0	0	0	0	0	0	0	0	0	0	0	0	0	0	0	0	0	0	0	0	0	0	0	0	0	0	1	0	0	0	0
H2TTX2	UP000005226	Takifugu rubripes	Chordata	Metazoa	0	0	0	0	0	0	0	0	0	0	0	0	0	0	0	0	0	0	0	0	0	0	0	0	0	0	0	0	0	0	0	0	0	0	0	0	0	0	0	0	1	0	0	0	0
A0A3Q3ND39	UP000261660	Labrus bergylta	Chordata	Metazoa	0	0	0	0	0	0	0	0	0	0	0	0	0	0	0	0	0	0	0	0	0	0	0	0	0	0	0	0	0	0	0	0	0	0	0	0	0	0	0	0	1	0	0	0	0
A0A8C9UQY2	UP000694422	Spermophilus dauricus	Chordata	Metazoa	0	0	0	0	0	0	0	0	0	0	0	0	0	0	0	0	0	0	0	0	0	0	0	0	0	0	0	0	0	0	0	0	0	0	0	0	0	0	0	0	1	0	0	0	0
A0A3Q2VLR6	UP000264840	Haplochromis burtoni	Chordata	Metazoa	0	0	0	0	0	0	0	0	0	0	0	0	0	0	0	0	0	0	0	0	0	0	0	0	0	0	0	0	0	0	0	0	0	0	0	0	0	0	0	0	1	0	0	0	0
A0A2K6EL76	UP000233160	Propithecus coquereli	Chordata	Metazoa	0	0	0	0	0	0	0	0	0	0	0	0	0	0	0	0	0	0	0	0	0	0	0	0	0	0	0	0	0	0	0	0	0	0	0	0	0	0	0	0	1	0	0	0	0
D2HWM8	UP000008912	Ailuropoda melanoleuca	Chordata	Metazoa	0	0	0	0	0	0	0	0	0	0	0	0	0	0	0	0	0	0	0	0	0	0	0	0	0	0	0	0	0	0	0	0	0	0	0	0	0	0	0	0	1	0	0	0	0
A0A6J2KW18	UP000504628	Phyllostomus discolor	Chordata	Metazoa	0	0	0	0	0	0	0	0	0	0	0	0	0	0	0	0	0	0	0	0	0	0	0	0	0	0	0	0	0	0	0	0	0	0	0	0	0	0	0	0	1	0	0	0	0
G3R0B0	UP000001519	Gorilla gorilla	Chordata	Metazoa	0	0	0	0	0	0	0	0	0	0	0	0	0	0	0	0	0	0	0	0	0	0	0	0	0	0	0	0	0	0	0	0	0	0	0	0	0	0	0	0	1	0	0	0	0
A0A2K6MPK5	UP000233180	Rhinopithecus bieti	Chordata	Metazoa	0	0	0	0	0	0	0	0	0	0	0	0	0	0	0	0	0	0	0	0	0	0	0	0	0	0	0	0	0	0	0	0	0	0	0	0	0	0	0	0	1	0	0	0	0
A0A8C7BWJ0	UP000694425	Neogale vison	Chordata	Metazoa	0	0	0	0	0	0	0	0	0	0	0	0	0	0	0	0	0	0	0	0	0	0	0	0	0	0	0	0	0	0	0	0	0	0	0	0	0	0	0	0	0	0	0	0	0
A0A8C5EPW4	UP000694680	Gouania willdenowi	Chordata	Metazoa	0	0	0	0	0	0	0	0	0	0	0	0	0	0	0	0	0	0	0	0	0	0	0	0	0	0	0	0	0	0	0	0	0	0	0	0	0	0	0	0	1	0	0	0	0
A0A3P9Q533	UP000242638	Poecilia reticulata	Chordata	Metazoa	0	0	0	0	0	0	0	0	0	0	0	0	0	0	0	0	0	0	0	0	0	0	0	0	0	0	0	0	0	0	0	0	0	0	0	0	0	0	0	0	1	0	0	0	0
M3ZS69	UP000002852	Xiphophorus maculatus	Chordata	Metazoa	0	0	0	0	0	0	0	0	0	0	0	0	0	0	0	0	0	0	0	0	0	0	0	0	0	0	0	0	0	0	0	0	0	0	0	0	0	0	0	0	1	0	0	0	0
A0A8C3UD37	UP000694563	Catharus ustulatus	Chordata	Metazoa	0	0	0	0	0	0	0	0	0	0	0	0	0	0	0	0	0	0	0	0	0	0	0	0	0	0	0	0	0	0	0	0	0	0	0	0	0	0	0	0	1	0	0	0	0
A0A8C2T287	UP000694412	Coturnix japonica	Chordata	Metazoa	0	0	0	0	0	0	0	0	0	0	0	0	0	0	0	0	0	0	0	0	0	0	0	0	0	0	0	0	0	0	0	0	0	0	0	0	0	0	0	0	1	0	0	0	0
A0A674HP59	UP000007754	Taeniopygia guttata	Chordata	Metazoa	0	0	0	0	0	0	0	0	0	0	0	0	0	0	0	0	0	0	0	0	0	0	0	0	0	0	0	0	0	0	0	0	0	0	0	0	0	0	0	0	1	0	0	0	0
A0A3Q3AR03	UP000264800	Kryptolebias marmoratus	Chordata	Metazoa	0	0	0	0	0	0	0	0	0	0	0	0	0	0	0	0	0	0	0	0	0	0	0	0	0	0	0	0	0	0	0	0	0	0	0	0	0	0	0	0	1	0	0	0	0
A0A8I3PCG3	UP000805418	Canis lupus	Chordata	Metazoa	0	0	0	0	0	0	0	0	0	0	0	0	0	0	0	0	0	0	0	0	0	0	0	0	0	0	0	0	0	0	0	0	0	0	0	0	0	0	0	0	1	0	0	0	0
A0A673VRM1	UP000472268	Suricata suricatta	Chordata	Metazoa	0	0	0	0	0	0	0	0	0	0	0	0	0	0	0	0	0	0	0	0	0	0	0	0	0	0	0	0	0	0	0	0	0	0	0	0	0	0	0	0	1	0	0	0	0
A0A8C7EKK8	UP000694425	Neogale vison	Chordata	Metazoa	0	0	0	0	0	0	0	0	0	0	0	0	0	0	0	0	0	0	0	0	0	0	0	0	0	0	0	0	0	0	0	0	0	0	0	0	0	0	0	0	1	0	0	0	0
A0A5F8H2V0	UP000002280	Monodelphis domestica	Chordata	Metazoa	0	0	0	0	0	0	0	0	0	0	0	0	0	0	0	0	0	0	0	0	0	0	0	0	0	0	0	0	0	0	0	0	0	0	0	0	0	0	0	0	1	0	0	0	0
G1TEF7	UP000001811	Oryctolagus cuniculus	Chordata	Metazoa	0	0	0	0	0	0	0	0	0	0	0	0	0	0	0	0	0	0	0	0	0	0	0	0	0	0	0	0	0	0	0	0	0	0	0	0	0	0	0	0	1	0	0	0	0
A0A2K5E1P0	UP000233020	Aotus nancymaae	Chordata	Metazoa	0	0	0	0	0	0	0	0	0	0	0	0	0	0	0	0	0	0	0	0	0	0	0	0	0	0	0	0	0	0	0	0	0	0	0	0	0	0	0	0	0	0	0	0	0
A0A8C4LLQ0	UP000694387	Equus asinus	Chordata	Metazoa	0	0	0	0	0	0	0	0	0	0	0	0	0	0	0	0	0	0	0	0	0	0	0	0	0	0	0	0	0	0	0	0	0	0	0	0	0	0	0	0	1	0	0	0	0
G3WU18	UP000007648	Sarcophilus harrisii	Chordata	Metazoa	0	0	0	0	0	0	0	0	0	0	0	0	0	0	0	0	0	0	0	0	0	0	0	0	0	0	0	0	0	0	0	0	0	0	0	0	0	0	0	0	1	0	0	0	0
A0A2K5NZY2	UP000233060	Cercocebus atys	Chordata	Metazoa	0	0	0	0	0	0	0	0	0	0	0	0	0	0	0	0	0	0	0	0	0	0	0	0	0	0	0	0	0	0	0	0	0	0	0	0	0	0	0	0	1	0	0	0	0
A0A671FXW0	UP000472240	Rhinolophus ferrumequinum	Chordata	Metazoa	0	0	0	0	0	0	0	0	0	0	0	0	0	0	0	0	0	0	0	0	0	0	0	0	0	0	0	0	0	0	0	0	0	0	0	0	0	0	0	0	1	0	0	0	0
A0A096NE40	UP000028761	Papio anubis	Chordata	Metazoa	0	0	0	0	0	0	0	0	0	0	0	0	0	0	0	0	0	0	0	0	0	0	0	0	0	0	0	0	0	0	0	0	0	0	0	0	0	0	0	0	1	0	0	0	0
A0A8D2GBI1	UP000694411	Theropithecus gelada	Chordata	Metazoa	0	0	0	0	0	0	0	0	0	0	0	0	0	0	0	0	0	0	0	0	0	0	0	0	0	0	0	0	0	0	0	0	0	0	0	0	0	0	0	0	1	0	0	0	0
G3RHJ8	UP000001519	Gorilla gorilla	Chordata	Metazoa	0	0	0	0	0	0	0	0	0	0	0	0	0	0	0	0	0	0	0	0	0	0	0	0	0	0	0	0	0	0	0	0	0	0	0	0	0	0	0	0	1	0	0	0	0
A0A8C9APG7	UP000694414	Prolemur simus	Chordata	Metazoa	0	0	0	0	0	0	0	0	0	0	0	0	0	0	0	0	0	0	0	0	0	0	0	0	0	0	0	0	0	0	0	0	0	0	0	0	0	0	0	0	1	0	0	0	0
A0A8C6DG33	UP000694544	Moschus moschiferus	Chordata	Metazoa	0	0	0	0	0	0	0	0	0	0	0	0	0	0	0	0	0	0	0	0	0	0	0	0	0	0	0	0	0	0	0	0	0	0	0	0	0	0	0	0	1	0	0	0	0
A0A0D9RD59	UP000029965	Chlorocebus sabaeus	Chordata	Metazoa	0	0	0	0	0	0	0	0	0	0	0	0	0	0	0	0	0	0	0	0	0	0	0	0	0	0	0	0	0	0	0	0	0	0	0	0	0	0	0	0	1	0	0	0	0
A0A2K5WB12	UP000233100	Macaca fascicularis	Chordata	Metazoa	0	0	0	0	0	0	0	0	0	0	0	0	0	0	0	0	0	0	0	0	0	0	0	0	0	0	0	0	0	0	0	0	0	0	0	0	0	0	0	0	1	0	0	0	0
A0A2K6DG36	UP000233120	Macaca nemestrina	Chordata	Metazoa	0	0	0	0	0	0	0	0	0	0	0	0	0	0	0	0	0	0	0	0	0	0	0	0	0	0	0	0	0	0	0	0	0	0	0	0	0	0	0	0	1	0	0	0	0
A0A8C9JL02	UP000675900	Panthera tigris	Chordata	Metazoa	0	0	0	0	0	0	0	0	0	0	0	0	0	0	0	0	0	0	0	0	0	0	0	0	0	0	0	0	0	0	0	0	0	0	0	0	0	0	0	0	1	0	0	0	0
A0A2K5QHP7	UP000233040	Cebus imitator	Chordata	Metazoa	0	0	0	0	0	0	0	0	0	0	0	0	0	0	0	0	0	0	0	0	0	0	0	0	0	0	0	0	0	0	0	0	0	0	0	0	0	0	0	0	1	0	0	0	0
A0A8B9XB12	UP000694520	Bos grunniens	Chordata	Metazoa	0	0	0	0	0	0	0	0	0	0	0	0	0	0	0	0	0	0	0	0	0	0	0	0	0	0	0	0	0	0	0	0	0	0	0	0	0	0	0	0	1	0	0	0	0
A0A452G162	UP000291000	Capra hircus	Chordata	Metazoa	0	0	0	0	0	0	0	0	0	0	0	0	0	0	0	0	0	0	0	0	0	0	0	0	0	0	0	0	0	0	0	0	0	0	0	0	0	0	0	0	1	0	0	0	0
A0A2K6S1N7	UP000233220	Saimiri boliviensis	Chordata	Metazoa	0	0	0	0	0	0	0	0	0	0	0	0	0	0	0	0	0	0	0	0	0	0	0	0	0	0	0	0	0	0	0	0	0	0	0	0	0	0	0	0	1	0	0	0	0
A0A2K5ZJ95	UP000233140	Mandrillus leucophaeus	Chordata	Metazoa	0	0	0	0	0	0	0	0	0	0	0	0	0	0	0	0	0	0	0	0	0	0	0	0	0	0	0	0	0	0	0	0	0	0	0	0	0	0	0	0	1	0	0	0	0
A0A8C6EKY9	UP000694394	Microcebus murinus	Chordata	Metazoa	0	0	0	0	0	0	0	0	0	0	0	0	0	0	0	0	0	0	0	0	0	0	0	0	0	0	0	0	0	0	0	0	0	0	0	0	0	0	0	0	1	0	0	0	0
A0A667HG86	UP000472241	Lynx canadensis	Chordata	Metazoa	0	0	0	0	0	0	0	0	0	0	0	0	0	0	0	0	0	0	0	0	0	0	0	0	0	0	0	0	0	0	0	0	0	0	0	0	0	0	0	0	1	0	0	0	0
M3W5U9	UP000011712	Felis catus	Chordata	Metazoa	0	0	0	0	0	0	0	0	0	0	0	0	0	0	0	0	0	0	0	0	0	0	0	0	0	0	0	0	0	0	0	0	0	0	0	0	0	0	0	0	1	0	0	0	0
H0VUW4	UP000005447	Cavia porcellus	Chordata	Metazoa	0	0	0	0	0	0	0	0	0	0	0	0	0	0	0	0	0	0	0	0	0	0	0	0	0	0	0	0	0	0	0	0	0	0	0	0	0	0	0	0	1	0	0	0	0
A0A2K5JQC5	UP000233080	Colobus angolensis	Chordata	Metazoa	0	0	0	0	0	0	0	0	0	0	0	0	0	0	0	0	0	0	0	0	0	0	0	0	0	0	0	0	0	0	0	0	0	0	0	0	0	0	0	0	1	0	0	0	0
A0A8C0KY53	UP000694391	Canis lupus	Chordata	Metazoa	0	0	0	0	0	0	0	0	0	0	0	0	0	0	0	0	0	0	0	0	0	0	0	0	0	0	0	0	0	0	0	0	0	0	0	0	0	0	0	0	1	0	0	0	0
A0A7J7VJQ5	UP000527355	Myotis myotis	Chordata	Metazoa	0	0	0	0	0	0	0	0	0	0	0	0	0	0	0	0	0	0	0	0	0	0	0	0	0	0	0	0	0	0	0	0	0	0	0	0	0	0	0	0	1	0	0	0	0
A0A8I3PBU5	UP000805418	Canis lupus	Chordata	Metazoa	0	0	0	0	0	0	0	0	0	0	0	0	0	0	0	0	0	0	0	0	0	0	0	0	0	0	0	0	0	0	0	0	0	0	0	0	0	0	0	0	1	0	0	0	0
G1NWW4	UP000001074	Myotis lucifugus	Chordata	Metazoa	0	0	0	0	0	0	0	0	0	0	0	0	0	0	0	0	0	0	0	0	0	0	0	0	0	0	0	0	0	0	0	0	0	0	0	0	0	0	0	0	1	0	0	0	0
A0A671FZM4	UP000472240	Rhinolophus ferrumequinum	Chordata	Metazoa	0	0	0	0	0	0	0	0	0	0	0	0	0	0	0	0	0	0	0	0	0	0	0	0	0	0	0	0	0	0	0	0	0	0	0	0	0	0	0	0	1	0	0	0	0
A0A8D2GUH6	UP000694417	Urocitellus parryii	Chordata	Metazoa	0	0	0	0	0	0	0	0	0	0	0	0	0	0	0	0	0	0	0	0	0	0	0	0	0	0	0	0	0	0	0	0	0	0	0	0	0	0	0	0	1	0	0	0	0
G1SIH4	UP000001811	Oryctolagus cuniculus	Chordata	Metazoa	0	0	0	0	0	0	0	0	0	0	0	0	0	0	0	0	0	0	0	0	0	0	0	0	0	0	0	0	0	0	0	0	0	0	0	0	0	0	0	0	1	0	0	0	0
K7G6P4	UP000007267	Pelodiscus sinensis	Chordata	Metazoa	0	0	0	0	0	0	0	0	0	0	0	0	0	0	0	0	0	0	0	0	0	0	0	0	0	0	0	0	0	0	0	0	0	0	0	0	0	0	0	0	1	0	0	0	0
A0A8C0QS89	UP000694404	Chelonoidis abingdonii	Chordata	Metazoa	0	0	0	0	0	0	0	0	0	0	0	0	0	0	0	0	0	0	0	0	0	0	0	0	0	0	0	0	0	0	0	0	0	0	0	0	0	0	0	0	1	0	0	0	0
H0X6A5	UP000005225	Otolemur garnettii	Chordata	Metazoa	0	0	0	0	0	0	0	0	0	0	0	0	0	0	0	0	0	0	0	0	0	0	0	0	0	0	0	0	0	0	0	0	0	0	0	0	0	0	0	0	1	0	0	0	0
A0A8C4Y0J7	UP000694390	Gopherus evgoodei	Chordata	Metazoa	0	0	0	0	0	0	0	0	0	0	0	0	0	0	0	0	0	0	0	0	0	0	0	0	0	0	0	0	0	0	0	0	0	0	0	0	0	0	0	0	1	0	0	0	0
A0A7J8H451	UP000593571	Rousettus aegyptiacus	Chordata	Metazoa	0	0	0	0	0	0	0	0	0	0	0	0	0	0	0	0	0	0	0	0	0	0	0	0	0	0	0	0	0	0	0	0	0	0	0	0	0	0	0	0	1	0	0	0	0
A0A674K3F8	UP000472274	Terrapene triunguis	Chordata	Metazoa	0	0	0	0	0	0	0	0	0	0	0	0	0	0	0	0	0	0	0	0	0	0	0	0	0	0	0	0	0	0	0	0	0	0	0	0	0	0	0	0	1	0	0	0	0
A0A8C9PJJ5	UP000694422	Spermophilus dauricus	Chordata	Metazoa	0	0	0	0	0	0	0	0	0	0	0	0	0	0	0	0	0	0	0	0	0	0	0	0	0	0	0	0	0	0	0	0	0	0	0	0	0	0	0	0	1	0	0	0	0
A0A4X2KNW5	UP000314987	Vombatus ursinus	Chordata	Metazoa	0	0	0	0	0	0	0	0	0	0	0	0	0	0	0	0	0	0	0	0	0	0	0	0	0	0	0	0	0	0	0	0	0	0	0	0	0	0	0	0	1	0	0	0	0
A0A7J7X225	UP000558488	Pipistrellus kuhlii	Chordata	Metazoa	0	0	0	0	0	0	0	0	0	0	0	0	0	0	0	0	0	0	0	0	0	0	0	0	0	0	0	0	0	0	0	0	0	0	0	0	0	0	0	0	1	0	0	0	0
F6SZK3	UP000002280	Monodelphis domestica	Chordata	Metazoa	0	0	0	0	0	0	0	0	0	0	0	0	0	0	0	0	0	0	0	0	0	0	0	0	0	0	0	0	0	0	0	0	0	0	0	0	0	0	0	0	1	0	0	0	0
A0A8D0GGQ3	UP000694392	Sphenodon punctatus	Chordata	Metazoa	0	0	0	0	0	0	0	0	0	0	0	0	0	0	0	0	0	0	0	0	0	0	0	0	0	0	0	0	0	0	0	0	0	0	0	0	0	0	0	0	1	0	0	0	0
G1LM35	UP000008912	Ailuropoda melanoleuca	Chordata	Metazoa	0	0	0	0	0	0	0	0	0	0	0	0	0	0	0	0	0	0	0	0	0	0	0	0	0	0	0	0	0	0	0	0	0	0	0	0	0	0	0	0	1	0	0	0	0
A0A8C9AKF3	UP000694414	Prolemur simus	Chordata	Metazoa	0	0	0	0	0	0	0	0	0	0	0	0	0	0	0	0	0	0	0	0	0	0	0	0	0	0	0	0	0	0	0	0	0	0	0	0	0	0	0	0	1	0	0	0	0
A0A0D9S1I3	UP000029965	Chlorocebus sabaeus	Chordata	Metazoa	0	0	0	0	0	0	0	0	0	0	0	0	0	0	0	0	0	0	0	0	0	0	0	0	0	0	0	0	0	0	0	0	0	0	0	0	0	0	0	0	1	0	0	0	0
A0A2K6G2W7	UP000233160	Propithecus coquereli	Chordata	Metazoa	0	0	0	0	0	0	0	0	0	0	0	0	0	0	0	0	0	0	0	0	0	0	0	0	0	0	0	0	0	0	0	0	0	0	0	0	0	0	0	0	1	0	0	0	0
A0A8D2ET86	UP000694411	Theropithecus gelada	Chordata	Metazoa	0	0	0	0	0	0	0	0	0	0	0	0	0	0	0	0	0	0	0	0	0	0	0	0	0	0	0	0	0	0	0	0	0	0	0	0	0	0	0	0	1	0	0	0	0
A0A096NAD3	UP000028761	Papio anubis	Chordata	Metazoa	0	0	0	0	0	0	0	0	0	0	0	0	0	0	0	0	0	0	0	0	0	0	0	0	0	0	0	0	0	0	0	0	0	0	0	0	0	0	0	0	1	0	0	0	0
A0A2K5LGY2	UP000233060	Cercocebus atys	Chordata	Metazoa	0	0	0	0	0	0	0	0	0	0	0	0	0	0	0	0	0	0	0	0	0	0	0	0	0	0	0	0	0	0	0	0	0	0	0	0	0	0	0	0	1	0	0	0	0
A0A2K6CWR3	UP000233120	Macaca nemestrina	Chordata	Metazoa	0	0	0	0	0	0	0	0	0	0	0	0	0	0	0	0	0	0	0	0	0	0	0	0	0	0	0	0	0	0	0	0	0	0	0	0	0	0	0	0	1	0	0	0	0
A0A7J8EUC1	UP000550707	Molossus molossus	Chordata	Metazoa	0	0	0	0	0	0	0	0	0	0	0	0	0	0	0	0	0	0	0	0	0	0	0	0	0	0	0	0	0	0	0	0	0	0	0	0	0	0	0	0	1	0	0	0	0
A0A2K5W1P0	UP000233100	Macaca fascicularis	Chordata	Metazoa	0	0	0	0	0	0	0	0	0	0	0	0	0	0	0	0	0	0	0	0	0	0	0	0	0	0	0	0	0	0	0	0	0	0	0	0	0	0	0	0	1	0	0	0	0
A0A8C7ADA5	UP000694425	Neogale vison	Chordata	Metazoa	0	0	0	0	0	0	0	0	0	0	0	0	0	0	0	0	0	0	0	0	0	0	0	0	0	0	0	0	0	0	0	0	0	0	0	0	0	0	0	0	1	0	0	0	0
A0A2K5Y6I8	UP000233140	Mandrillus leucophaeus	Chordata	Metazoa	0	0	0	0	0	0	0	0	0	0	0	0	0	0	0	0	0	0	0	0	0	0	0	0	0	0	0	0	0	0	0	0	0	0	0	0	0	0	0	0	1	0	0	0	0
A0A673TDN0	UP000472268	Suricata suricatta	Chordata	Metazoa	0	0	0	0	0	0	0	0	0	0	0	0	0	0	0	0	0	0	0	0	0	0	0	0	0	0	0	0	0	0	0	0	0	0	0	0	0	0	0	0	1	0	0	0	0
G3T1S5	UP000007646	Loxodonta africana	Chordata	Metazoa	0	0	0	0	0	0	0	0	0	0	0	0	0	0	0	0	0	0	0	0	0	0	0	0	0	0	0	0	0	0	0	0	0	0	0	0	0	0	0	0	1	0	0	0	0
A0A8C6WCL3	UP000694381	Nannospalax galili	Chordata	Metazoa	0	0	0	0	0	0	0	0	0	0	0	0	0	0	0	0	0	0	0	0	0	0	0	0	0	0	0	0	0	0	0	0	0	0	0	0	0	0	0	0	1	0	0	0	0
G3RJJ5	UP000001519	Gorilla gorilla	Chordata	Metazoa	0	0	0	0	0	0	0	0	0	0	0	0	0	0	0	0	0	0	0	0	0	0	0	0	0	0	0	0	0	0	0	0	0	0	0	0	0	0	0	0	1	0	0	0	0
A0A6I9LUE3	UP000504601	Peromyscus maniculatus	Chordata	Metazoa	0	0	0	0	0	0	0	0	0	0	0	0	0	0	0	0	0	0	0	0	0	0	0	0	0	0	0	0	0	0	0	0	0	0	0	0	0	0	0	0	1	0	0	0	0
A0A2K6M7Z1	UP000233180	Rhinopithecus bieti	Chordata	Metazoa	0	0	0	0	0	0	0	0	0	0	0	0	0	0	0	0	0	0	0	0	0	0	0	0	0	0	0	0	0	0	0	0	0	0	0	0	0	0	0	0	1	0	0	0	0
A0A2K6NHP8	UP000233200	Rhinopithecus roxellana	Chordata	Metazoa	0	0	0	0	0	0	0	0	0	0	0	0	0	0	0	0	0	0	0	0	0	0	0	0	0	0	0	0	0	0	0	0	0	0	0	0	0	0	0	0	1	0	0	0	0
A0A8B7EKK3	UP000694394	Microcebus murinus	Chordata	Metazoa	0	0	0	0	0	0	0	0	0	0	0	0	0	0	0	0	0	0	0	0	0	0	0	0	0	0	0	0	0	0	0	0	0	0	0	0	0	0	0	0	1	0	0	0	0
A0A8C5LMS0	UP000694569	Leptobrachium leishanense	Chordata	Metazoa	0	0	0	0	0	0	0	0	0	0	0	0	0	0	0	0	0	0	0	0	0	0	0	0	0	0	0	0	0	0	0	0	0	0	0	0	0	0	0	0	1	0	0	0	0
G3WYN4	UP000007648	Sarcophilus harrisii	Chordata	Metazoa	0	0	0	0	0	0	0	0	0	0	0	0	0	0	0	0	0	0	0	0	0	0	0	0	0	0	0	0	0	0	0	0	0	0	0	0	0	0	0	0	1	0	0	0	0
A0A8C9ING5	UP000694416	Piliocolobus tephrosceles	Chordata	Metazoa	0	0	0	0	0	0	0	0	0	0	0	0	0	0	0	0	0	0	0	0	0	0	0	0	0	0	0	0	0	0	0	0	0	0	0	0	0	0	0	0	1	0	0	0	0
A0A8C9BZF4	UP000694554	Phocoena sinus	Chordata	Metazoa	0	0	0	0	0	0	0	0	0	0	0	0	0	0	0	0	0	0	0	0	0	0	0	0	0	0	0	0	0	0	0	0	0	0	0	0	0	0	0	0	1	0	0	0	0
A0A8D2CQA6	UP000694564	Sciurus vulgaris	Chordata	Metazoa	0	0	0	0	0	0	0	0	0	0	0	0	0	0	0	0	0	0	0	0	0	0	0	0	0	0	0	0	0	0	0	0	0	0	0	0	0	0	0	0	1	0	0	0	0
A0A2K5K491	UP000233080	Colobus angolensis	Chordata	Metazoa	0	0	0	0	0	0	0	0	0	0	0	0	0	0	0	0	0	0	0	0	0	0	0	0	0	0	0	0	0	0	0	0	0	0	0	0	0	0	0	0	1	0	0	0	0
A0A2K6T7K3	UP000233220	Saimiri boliviensis	Chordata	Metazoa	0	0	0	0	0	0	0	0	0	0	0	0	0	0	0	0	0	0	0	0	0	0	0	0	0	0	0	0	0	0	0	0	0	0	0	0	0	0	0	0	1	0	0	0	0
A0A2K5PHQ0	UP000233040	Cebus imitator	Chordata	Metazoa	0	0	0	0	0	0	0	0	0	0	0	0	0	0	0	0	0	0	0	0	0	0	0	0	0	0	0	0	0	0	0	0	0	0	0	0	0	0	0	0	1	0	0	0	0
F6T3J6	UP000008225	Callithrix jacchus	Chordata	Metazoa	0	0	0	0	0	0	0	0	0	0	0	0	0	0	0	0	0	0	0	0	0	0	0	0	0	0	0	0	0	0	0	0	0	0	0	0	0	0	0	0	1	0	0	0	0
A0A7M4G0R9	UP000594220	Crocodylus porosus	Chordata	Metazoa	0	0	0	0	0	0	0	0	0	0	0	0	0	0	0	0	0	0	0	0	0	0	0	0	0	0	0	0	0	0	0	0	0	0	0	0	0	0	0	0	1	0	0	0	0
A0A8C6E0K6	UP000694544	Moschus moschiferus	Chordata	Metazoa	0	0	0	0	0	0	0	0	0	0	0	0	0	0	0	0	0	0	0	0	0	0	0	0	0	0	0	0	0	0	0	0	0	0	0	0	0	0	0	0	1	0	0	0	0
A0A8C0A983	UP000694520	Bos grunniens	Chordata	Metazoa	0	0	0	0	0	0	0	0	0	0	0	0	0	0	0	0	0	0	0	0	0	0	0	0	0	0	0	0	0	0	0	0	0	0	0	0	0	0	0	0	1	0	0	0	0
A0A670ILK5	UP000472272	Podarcis muralis	Chordata	Metazoa	0	0	0	0	0	0	0	0	0	0	0	0	0	0	0	0	0	0	0	0	0	0	0	0	0	0	0	0	0	0	0	0	0	0	0	0	0	0	0	0	1	0	0	0	0
A0A8D0BU48	UP000694421	Salvator merianae	Chordata	Metazoa	0	0	0	0	0	0	0	0	0	0	0	0	0	0	0	0	0	0	0	0	0	0	0	0	0	0	0	0	0	0	0	0	0	0	0	0	0	0	0	0	1	0	0	0	0
A0A9L0KIE8	UP000694387	Equus asinus	Chordata	Metazoa	0	0	0	0	0	0	0	0	0	0	0	0	0	0	0	0	0	0	0	0	0	0	0	0	0	0	0	0	0	0	0	0	0	0	0	0	0	0	0	0	1	0	0	0	0
A0A8C9KP81	UP000675900	Panthera tigris	Chordata	Metazoa	0	0	0	0	0	0	0	0	0	0	0	0	0	0	0	0	0	0	0	0	0	0	0	0	0	0	0	0	0	0	0	0	0	0	0	0	0	0	0	0	1	0	0	0	0
A0A8C8Y0B5	UP000694399	Panthera leo	Chordata	Metazoa	0	0	0	0	0	0	0	0	0	0	0	0	0	0	0	0	0	0	0	0	0	0	0	0	0	0	0	0	0	0	0	0	0	0	0	0	0	0	0	0	1	0	0	0	0
A0A667HIE3	UP000472241	Lynx canadensis	Chordata	Metazoa	0	0	0	0	0	0	0	0	0	0	0	0	0	0	0	0	0	0	0	0	0	0	0	0	0	0	0	0	0	0	0	0	0	0	0	0	0	0	0	0	1	0	0	0	0
W5PIP2	UP000002356	Ovis aries	Chordata	Metazoa	0	0	0	0	0	0	0	0	0	0	0	0	0	0	0	0	0	0	0	0	0	0	0	0	0	0	0	0	0	0	0	0	0	0	0	0	0	0	0	0	1	0	0	0	0
A0A452DWK6	UP000291000	Capra hircus	Chordata	Metazoa	0	0	0	0	0	0	0	0	0	0	0	0	0	0	0	0	0	0	0	0	0	0	0	0	0	0	0	0	0	0	0	0	0	0	0	0	0	0	0	0	1	0	0	0	0
G1KPG4	UP000001646	Anolis carolinensis	Chordata	Metazoa	0	0	0	0	0	0	0	0	0	0	0	0	0	0	0	0	0	0	0	0	0	0	0	0	0	0	0	0	0	0	0	0	0	0	0	0	0	0	0	0	1	0	0	0	0
A0A8C3VNJ2	UP000694540	Catagonus wagneri	Chordata	Metazoa	0	0	0	0	0	0	0	0	0	0	0	0	0	0	0	0	0	0	0	0	0	0	0	0	0	0	0	0	0	0	0	0	0	0	0	0	0	0	0	0	1	0	0	0	0
A0A2K5E0Z6	UP000233020	Aotus nancymaae	Chordata	Metazoa	0	0	0	0	0	0	0	0	0	0	0	0	0	0	0	0	0	0	0	0	0	0	0	0	0	0	0	0	0	0	0	0	0	0	0	0	0	0	0	0	1	0	0	0	0
A0A670Y3Z4	UP000472273	Pseudonaja textilis	Chordata	Metazoa	0	0	0	0	0	0	0	0	0	0	0	0	0	0	0	0	0	0	0	0	0	0	0	0	0	0	0	0	0	0	0	0	0	0	0	0	0	0	0	0	1	0	0	0	0
A0A8D2KXS5	UP000694545	Varanus komodoensis	Chordata	Metazoa	0	0	0	0	0	0	0	0	0	0	0	0	0	0	0	0	0	0	0	0	0	0	0	0	0	0	0	0	0	0	0	0	0	0	0	0	0	0	0	0	1	0	0	0	0
A0A4W3JAP3	UP000314986	Callorhinchus milii	Chordata	Metazoa	0	0	0	0	0	0	0	0	0	0	0	0	0	0	0	0	0	0	0	0	0	0	0	0	0	0	0	0	0	0	0	0	0	0	0	0	0	0	0	0	1	0	0	0	0
A0A8C6X315	UP000694559	Naja naja	Chordata	Metazoa	0	0	0	0	0	0	0	0	0	0	0	0	0	0	0	0	0	0	0	0	0	0	0	0	0	0	0	0	0	0	0	0	0	0	0	0	0	0	0	0	1	0	0	0	0
H0UT41	UP000005447	Cavia porcellus	Chordata	Metazoa	0	0	0	0	0	0	0	0	0	0	0	0	0	0	0	0	0	0	0	0	0	0	0	0	0	0	0	0	0	0	0	0	0	0	0	0	0	0	0	0	1	0	0	0	0
H2ZV85	UP000008672	Latimeria chalumnae	Chordata	Metazoa	0	0	0	0	0	0	0	0	0	0	0	0	0	0	0	0	0	0	0	0	0	0	0	0	0	0	0	0	0	0	0	0	0	0	0	0	0	0	0	0	1	0	0	0	0
H2Q773	UP000002277	Pan troglodytes	Chordata	Metazoa	0	0	0	0	0	0	0	0	0	0	0	0	0	0	0	0	0	0	0	0	0	0	0	0	0	0	0	0	0	0	0	0	0	0	0	0	0	0	0	0	1	0	0	0	0
E1AWN5	UP000006718	Macaca mulatta	Chordata	Metazoa	0	0	0	0	0	0	0	0	0	0	0	0	0	0	0	0	0	0	0	0	0	0	0	0	0	0	0	0	0	0	0	0	0	0	0	0	0	0	0	0	1	0	0	0	0
M3WKG8	UP000011712	Felis catus	Chordata	Metazoa	0	0	0	0	0	0	0	0	0	0	0	0	0	0	0	0	0	0	0	0	0	0	0	0	0	0	0	0	0	0	0	0	0	0	0	0	0	0	0	0	1	0	0	0	0
A0A9L0QXL0	UP000002281	Equus caballus	Chordata	Metazoa	0	0	0	0	0	0	0	0	0	0	0	0	0	0	0	0	0	0	0	0	0	0	0	0	0	0	0	0	0	0	0	0	0	0	0	0	0	0	0	0	1	0	0	0	0
E1BJC4	UP000009136	Bos taurus	Chordata	Metazoa	0	0	0	0	0	0	0	0	0	0	0	0	0	0	0	0	0	0	0	0	0	0	0	0	0	0	0	0	0	0	0	0	0	0	0	0	0	0	0	0	1	0	0	0	0
F1RFQ4	UP000008227	Sus scrofa	Chordata	Metazoa	0	0	0	0	0	0	0	0	0	0	0	0	0	0	0	0	0	0	0	0	0	0	0	0	0	0	0	0	0	0	0	0	0	0	0	0	0	0	0	0	1	0	0	0	0
A0A8W4FE90	UP000008227	Sus scrofa	Chordata	Metazoa	0	0	0	0	0	0	0	0	0	0	0	0	0	0	0	0	0	0	0	0	0	0	0	0	0	0	0	0	0	0	0	0	0	0	0	0	0	0	0	0	1	0	0	0	0
F6ZFD5	UP000002281	Equus caballus	Chordata	Metazoa	0	0	0	0	0	0	0	0	0	0	0	0	0	0	0	0	0	0	0	0	0	0	0	0	0	0	0	0	0	0	0	0	0	0	0	0	0	0	0	0	1	0	0	0	0
A0A2J8QN21	UP000002277	Pan troglodytes	Chordata	Metazoa	0	0	0	0	0	0	0	0	0	0	0	0	0	0	0	0	0	0	0	0	0	0	0	0	0	0	0	0	0	0	0	0	0	0	0	0	0	0	0	0	1	0	0	0	0
F6WHH7	UP000006718	Macaca mulatta	Chordata	Metazoa	0	0	0	0	0	0	0	0	0	0	0	0	0	0	0	0	0	0	0	0	0	0	0	0	0	0	0	0	0	0	0	0	0	0	0	0	0	0	0	0	1	0	0	0	0
F7ER81	UP000006718	Macaca mulatta	Chordata	Metazoa	0	0	0	0	0	0	0	0	0	0	0	0	0	0	0	0	0	0	0	0	0	0	0	0	0	0	0	0	0	0	0	0	0	0	0	0	0	0	0	0	1	0	0	0	0
A0A2I3TEJ7	UP000002277	Pan troglodytes	Chordata	Metazoa	0	0	0	0	0	0	0	0	0	0	0	0	0	0	0	0	0	0	0	0	0	0	0	0	0	0	0	0	0	0	0	0	0	0	0	0	0	0	0	0	1	0	0	0	0
F1STJ5	UP000008227	Sus scrofa	Chordata	Metazoa	0	0	0	0	0	0	0	0	0	0	0	0	0	0	0	0	0	0	0	0	0	0	0	0	0	0	0	0	0	0	0	0	0	0	0	0	0	0	0	0	1	0	0	0	0
A0A9L0TJZ2	UP000002281	Equus caballus	Chordata	Metazoa	0	0	0	0	0	0	0	0	0	0	0	0	0	0	0	0	0	0	0	0	0	0	0	0	0	0	0	0	0	0	0	0	0	0	0	0	0	0	0	0	1	0	0	0	0
A0AAA9SK90	UP000009136	Bos taurus	Chordata	Metazoa	0	0	0	0	0	0	0	0	0	0	0	0	0	0	0	0	0	0	0	0	0	0	0	0	0	0	0	0	0	0	0	0	0	0	0	0	0	0	0	0	1	0	0	0	0
M3WE65	UP000011712	Felis catus	Chordata	Metazoa	0	0	0	0	0	0	0	0	0	0	0	0	0	0	0	0	0	0	0	0	0	0	0	0	0	0	0	0	0	0	0	0	0	0	0	0	0	0	0	0	1	0	0	0	0
A0A2A3EJG8	UP000242457	Apis cerana	Arthropoda	Metazoa	0	0	0	0	0	0	0	0	0	0	0	0	0	0	0	0	0	0	0	0	0	0	0	0	0	0	0	0	0	0	0	0	0	0	0	0	0	0	0	0	1	0	0	0	0
A0A836JIF0	UP000668214	Pseudoatta argentina	Arthropoda	Metazoa	0	0	0	0	0	0	0	0	0	0	0	0	0	0	0	0	0	0	0	0	0	0	0	0	0	0	0	0	0	0	0	0	0	0	0	0	0	0	0	0	1	0	0	0	0
A0A3M7P508	UP000276133	Brachionus plicatilis	Rotifera	Metazoa	0	0	0	0	0	0	0	0	0	0	0	0	0	0	0	0	0	0	0	0	0	0	0	0	0	0	0	0	0	0	0	0	0	0	0	0	0	0	0	0	0	0	0	0	0
A0A5E4B2B5	UP000335636	Marmota monax	Chordata	Metazoa	0	0	0	0	0	0	0	0	0	0	0	0	0	0	0	0	0	0	0	0	0	0	0	0	0	0	0	0	0	0	0	0	0	0	0	0	0	0	0	0	1	0	0	0	0
A0A0P5ZGI3	UP000076858	Daphnia magna	Arthropoda	Metazoa	0	0	0	0	0	0	0	0	0	0	0	0	0	0	0	0	0	0	0	0	0	0	0	0	0	0	0	0	0	0	0	0	0	0	0	0	0	0	0	0	1	0	0	0	0
A0A0P5ZCQ2	UP000076858	Daphnia magna	Arthropoda	Metazoa	0	0	0	0	0	0	0	0	0	0	0	0	0	0	0	0	0	0	0	0	0	0	0	0	0	0	0	0	0	0	0	0	0	0	0	0	0	0	0	0	0	0	0	0	0
A0A1V9XD71	UP000192247	Tropilaelaps mercedesae	Arthropoda	Metazoa	0	0	0	0	0	0	0	0	0	0	0	0	0	0	0	0	0	0	0	0	0	0	0	0	0	0	0	0	0	0	0	0	0	0	0	0	0	0	0	0	0	0	0	0	0
A0A0C9RXH0	UP000694866	Fopius arisanus	Arthropoda	Metazoa	0	0	0	0	0	0	0	0	0	0	0	0	0	0	0	0	0	0	0	0	0	0	0	0	0	0	0	0	0	0	0	0	0	0	0	0	0	0	0	0	1	0	0	0	0
A0A8J5JSE7	UP000747542	Homarus americanus	Arthropoda	Metazoa	0	0	0	0	0	0	0	0	0	0	0	0	0	0	0	0	0	0	0	0	0	0	0	0	0	0	0	0	0	0	0	0	0	0	0	0	0	0	0	0	0	0	0	0	0
A0A091ULS7	UP000053283	Nipponia nippon	Chordata	Metazoa	0	0	0	0	0	0	0	0	0	0	0	0	0	0	0	0	0	0	0	0	0	0	0	0	0	0	0	0	0	0	0	0	0	0	0	0	0	0	0	0	1	0	0	0	0
A0A087QSK6	UP000053286	Aptenodytes forsteri	Chordata	Metazoa	0	0	0	0	0	0	0	0	0	0	0	0	0	0	0	0	0	0	0	0	0	0	0	0	0	0	0	0	0	0	0	0	0	0	0	0	0	0	0	0	1	0	0	0	0
A0A093NJI3	UP000054081	Pygoscelis adeliae	Chordata	Metazoa	0	0	0	0	0	0	0	0	0	0	0	0	0	0	0	0	0	0	0	0	0	0	0	0	0	0	0	0	0	0	0	0	0	0	0	0	0	0	0	0	1	0	0	0	0
A0A091FPE0	UP000053760	Cuculus canorus	Chordata	Metazoa	0	0	0	0	0	0	0	0	0	0	0	0	0	0	0	0	0	0	0	0	0	0	0	0	0	0	0	0	0	0	0	0	0	0	0	0	0	0	0	0	1	0	0	0	0
A0A087RFE3	UP000053286	Aptenodytes forsteri	Chordata	Metazoa	0	0	0	0	0	0	0	0	0	0	0	0	0	0	0	0	0	0	0	0	0	0	0	0	0	0	0	0	0	0	0	0	0	0	0	0	0	0	0	0	0	0	0	0	0
A0A091VRF2	UP000053283	Nipponia nippon	Chordata	Metazoa	0	0	0	0	0	0	0	0	0	0	0	0	0	0	0	0	0	0	0	0	0	0	0	0	0	0	0	0	0	0	0	0	0	0	0	0	0	0	0	0	0	0	0	0	0
A0A099ZW84	UP000053858	Charadrius vociferus	Chordata	Metazoa	0	0	0	0	0	0	0	0	0	0	0	0	0	0	0	0	0	0	0	0	0	0	0	0	0	0	0	0	0	0	0	0	0	0	0	0	0	0	0	0	0	0	0	0	0
A0A091FM18	UP000053760	Cuculus canorus	Chordata	Metazoa	0	0	0	0	0	0	0	0	0	0	0	0	0	0	0	0	0	0	0	0	0	0	0	0	0	0	0	0	0	0	0	0	0	0	0	0	0	0	0	0	0	0	0	0	0
A0A8J5JZU7	UP000747542	Homarus americanus	Arthropoda	Metazoa	0	0	0	0	0	0	0	0	0	0	0	0	0	0	0	0	0	0	0	0	0	0	0	0	0	0	0	0	0	0	0	0	0	0	0	0	0	0	0	0	1	0	0	0	0
A0A8J5KDM8	UP000747542	Homarus americanus	Arthropoda	Metazoa	0	0	0	0	0	0	0	0	0	0	0	0	0	0	0	0	0	0	0	0	0	0	0	0	0	0	0	0	0	0	0	0	0	0	0	0	0	0	0	0	1	0	0	0	0
A0A026WDD8	UP000053097	Ooceraea biroi	Arthropoda	Metazoa	0	0	0	0	0	0	0	0	0	0	0	0	0	0	0	0	0	0	0	0	0	0	0	0	0	0	0	0	0	0	0	0	0	0	0	0	0	0	0	0	1	0	0	0	0
D9N120	UP000001940	Caenorhabditis elegans	Nematoda	Metazoa	0	0	0	0	0	0	0	0	0	0	0	0	0	0	0	0	0	0	0	0	0	0	0	0	0	0	0	0	0	0	0	0	0	0	0	0	0	0	0	0	1	0	0	0	0
A0A0T7CIX3	UP000001940	Caenorhabditis elegans	Nematoda	Metazoa	0	0	0	0	0	0	0	0	0	0	0	0	0	0	0	0	0	0	0	0	0	0	0	0	0	0	0	0	0	0	0	0	0	0	0	0	0	0	0	0	1	0	0	0	0
A0A8X6KWP6	UP000887116	Trichonephila clavata	Arthropoda	Metazoa	0	0	0	0	0	0	0	0	0	0	0	0	0	0	0	0	0	0	0	0	0	0	0	0	0	0	0	0	0	0	0	0	0	0	0	0	0	0	0	0	0	0	0	0	0
A0A0L7LVG4	UP000037510	Operophtera brumata	Arthropoda	Metazoa	0	0	0	0	0	0	0	0	0	0	0	0	0	0	0	0	0	0	0	0	0	0	0	0	0	0	0	0	0	0	0	0	0	0	0	0	0	0	0	0	0	0	0	0	0
A0A443SLL0	UP000288716	Leptotrombidium deliense	Arthropoda	Metazoa	0	0	0	0	0	0	0	0	0	0	0	0	0	0	0	0	0	0	0	0	0	0	0	0	0	0	0	0	0	0	0	0	0	0	0	0	0	0	0	0	2	0	0	0	0
A0A1V4JTT9	UP000190648	Patagioenas fasciata	Chordata	Metazoa	0	0	0	0	0	0	0	0	0	0	0	0	0	0	0	0	0	0	0	0	0	0	0	0	0	0	0	0	0	0	0	0	0	0	0	0	0	0	0	0	1	0	0	0	0
Q96J94	UP000005640	Homo sapiens	Chordata	Metazoa	0	0	0	0	0	0	0	0	0	0	0	0	0	0	0	0	0	0	0	0	0	0	0	0	0	0	0	0	0	0	0	0	0	0	0	0	0	0	0	0	1	0	0	0	0
A0A6P6HGD5	UP000515131	Puma concolor	Chordata	Metazoa	0	0	0	0	0	0	0	0	0	0	0	0	0	0	0	0	0	0	0	0	0	0	0	0	0	0	0	0	0	0	0	0	0	0	0	0	0	0	0	0	1	0	0	0	0
A0A6P7Z9M1	UP000515156	Microcaecilia unicolor	Chordata	Metazoa	0	0	0	0	0	0	0	0	0	0	0	0	0	0	0	0	0	0	0	0	0	0	0	0	0	0	0	0	0	0	0	0	0	0	0	0	0	0	0	0	1	0	0	0	0
A0A2Y9E0Y4	UP000248480	Trichechus manatus	Chordata	Metazoa	0	0	0	0	0	0	0	0	0	0	0	0	0	0	0	0	0	0	0	0	0	0	0	0	0	0	0	0	0	0	0	0	0	0	0	0	0	0	0	0	1	0	0	0	0
F6YFN1	UP000002280	Monodelphis domestica	Chordata	Metazoa	0	0	0	0	0	0	0	0	0	0	0	0	0	0	0	0	0	0	0	0	0	0	0	0	0	0	0	0	0	0	0	0	0	0	0	0	0	0	0	0	1	0	0	0	0
A0A6P3R7V9	UP000515202	Pteropus vampyrus	Chordata	Metazoa	0	0	0	0	0	0	0	0	0	0	0	0	0	0	0	0	0	0	0	0	0	0	0	0	0	0	0	0	0	0	0	0	0	0	0	0	0	0	0	0	1	0	0	0	0
A0A6J3F3F7	UP000504640	Sapajus apella	Chordata	Metazoa	0	0	0	0	0	0	0	0	0	0	0	0	0	0	0	0	0	0	0	0	0	0	0	0	0	0	0	0	0	0	0	0	0	0	0	0	0	0	0	0	1	0	0	0	0
L8IZQ3	UP000011080	Bos mutus	Chordata	Metazoa	0	0	0	0	0	0	0	0	0	0	0	0	0	0	0	0	0	0	0	0	0	0	0	0	0	0	0	0	0	0	0	0	0	0	0	0	0	0	0	0	1	0	0	0	0
A0A6P5D350	UP000515132	Bos indicus	Chordata	Metazoa	0	0	0	0	0	0	0	0	0	0	0	0	0	0	0	0	0	0	0	0	0	0	0	0	0	0	0	0	0	0	0	0	0	0	0	0	0	0	0	0	1	0	0	0	0
A0A6P3IIG2	UP000515208	Bison bison	Chordata	Metazoa	0	0	0	0	0	0	0	0	0	0	0	0	0	0	0	0	0	0	0	0	0	0	0	0	0	0	0	0	0	0	0	0	0	0	0	0	0	0	0	0	1	0	0	0	0
A0A3Q7U4V5	UP000286640	Vulpes vulpes	Chordata	Metazoa	0	0	0	0	0	0	0	0	0	0	0	0	0	0	0	0	0	0	0	0	0	0	0	0	0	0	0	0	0	0	0	0	0	0	0	0	0	0	0	0	1	0	0	0	0
A0A9B0U1E2	UP000504623	Chrysochloris asiatica	Chordata	Metazoa	0	0	0	0	0	0	0	0	0	0	0	0	0	0	0	0	0	0	0	0	0	0	0	0	0	0	0	0	0	0	0	0	0	0	0	0	0	0	0	0	1	0	0	0	0
A0A2U3X0J8	UP000245340	Odobenus rosmarus	Chordata	Metazoa	0	0	0	0	0	0	0	0	0	0	0	0	0	0	0	0	0	0	0	0	0	0	0	0	0	0	0	0	0	0	0	0	0	0	0	0	0	0	0	0	1	0	0	0	0
W5Q433	UP000002356	Ovis aries	Chordata	Metazoa	0	0	0	0	0	0	0	0	0	0	0	0	0	0	0	0	0	0	0	0	0	0	0	0	0	0	0	0	0	0	0	0	0	0	0	0	0	0	0	0	1	0	0	0	0
A0A8C8S716	UP000694393	Pelusios castaneus	Chordata	Metazoa	0	0	0	0	0	0	0	0	0	0	0	0	0	0	0	0	0	0	0	0	0	0	0	0	0	0	0	0	0	0	0	0	0	0	0	0	0	0	0	0	1	0	0	0	0
A0A3Q7N0K0	UP000286641	Callorhinus ursinus	Chordata	Metazoa	0	0	0	0	0	0	0	0	0	0	0	0	0	0	0	0	0	0	0	0	0	0	0	0	0	0	0	0	0	0	0	0	0	0	0	0	0	0	0	0	1	0	0	0	0
A0A1S3FS22	UP000081671	Dipodomys ordii	Chordata	Metazoa	0	0	0	0	0	0	0	0	0	0	0	0	0	0	0	0	0	0	0	0	0	0	0	0	0	0	0	0	0	0	0	0	0	0	0	0	0	0	0	0	1	0	0	0	0
A0A8B7AZ60	UP000694850	Orycteropus afer	Chordata	Metazoa	0	0	0	0	0	0	0	0	0	0	0	0	0	0	0	0	0	0	0	0	0	0	0	0	0	0	0	0	0	0	0	0	0	0	0	0	0	0	0	0	1	0	0	0	0
A0A2Y9HRT4	UP000248481	Neomonachus schauinslandi	Chordata	Metazoa	0	0	0	0	0	0	0	0	0	0	0	0	0	0	0	0	0	0	0	0	0	0	0	0	0	0	0	0	0	0	0	0	0	0	0	0	0	0	0	0	1	0	0	0	0
A0A9F2KWK8	UP000695026	Python bivittatus	Chordata	Metazoa	0	0	0	0	0	0	0	0	0	0	0	0	0	0	0	0	0	0	0	0	0	0	0	0	0	0	0	0	0	0	0	0	0	0	0	0	0	0	0	0	1	0	0	0	0
A0A5N3X8E9	UP000326062	Muntiacus reevesi	Chordata	Metazoa	0	0	0	0	0	0	0	0	0	0	0	0	0	0	0	0	0	0	0	0	0	0	0	0	0	0	0	0	0	0	0	0	0	0	0	0	0	0	0	0	1	0	0	0	0
A0A2Y9F136	UP000248484	Physeter catodon	Chordata	Metazoa	0	0	0	0	0	0	0	0	0	0	0	0	0	0	0	0	0	0	0	0	0	0	0	0	0	0	0	0	0	0	0	0	0	0	0	0	0	0	0	0	1	0	0	0	0
A0A2Y9KH00	UP000248482	Enhydra lutris	Chordata	Metazoa	0	0	0	0	0	0	0	0	0	0	0	0	0	0	0	0	0	0	0	0	0	0	0	0	0	0	0	0	0	0	0	0	0	0	0	0	0	0	0	0	1	0	0	0	0
A0A6P3FEU7	UP000515203	Octodon degus	Chordata	Metazoa	0	0	0	0	0	0	0	0	0	0	0	0	0	0	0	0	0	0	0	0	0	0	0	0	0	0	0	0	0	0	0	0	0	0	0	0	0	0	0	0	1	0	0	0	0
Q9JMB7	UP000000589	Mus musculus	Chordata	Metazoa	0	0	0	0	0	0	0	0	0	0	0	0	0	0	0	0	0	0	0	0	0	0	0	0	0	0	0	0	0	0	0	0	0	0	0	0	0	0	0	0	1	0	0	0	0
A0A9W3EFY3	UP000694950	Camelus bactrianus	Chordata	Metazoa	0	0	0	0	0	0	0	0	0	0	0	0	0	0	0	0	0	0	0	0	0	0	0	0	0	0	0	0	0	0	0	0	0	0	0	0	0	0	0	0	1	0	0	0	0
A0A6J2ZZ60	UP000504605	Vicugna pacos	Chordata	Metazoa	0	0	0	0	0	0	0	0	0	0	0	0	0	0	0	0	0	0	0	0	0	0	0	0	0	0	0	0	0	0	0	0	0	0	0	0	0	0	0	0	1	0	0	0	0
A0A151NS62	UP000050525	Alligator mississippiensis	Chordata	Metazoa	0	0	0	0	0	0	0	0	0	0	0	0	0	0	0	0	0	0	0	0	0	0	0	0	0	0	0	0	0	0	0	0	0	0	0	0	0	0	0	0	1	0	0	0	0
A0A1U7UQH2	UP000189704	Carlito syrichta	Chordata	Metazoa	0	0	0	0	0	0	0	0	0	0	0	0	0	0	0	0	0	0	0	0	0	0	0	0	0	0	0	0	0	0	0	0	0	0	0	0	0	0	0	0	1	0	0	0	0
A0A1U7RMU8	UP000189705	Alligator sinensis	Chordata	Metazoa	0	0	0	0	0	0	0	0	0	0	0	0	0	0	0	0	0	0	0	0	0	0	0	0	0	0	0	0	0	0	0	0	0	0	0	0	0	0	0	0	1	0	0	0	0
A0A2U3V9L6	UP000245320	Tursiops truncatus	Chordata	Metazoa	0	0	0	0	0	0	0	0	0	0	0	0	0	0	0	0	0	0	0	0	0	0	0	0	0	0	0	0	0	0	0	0	0	0	0	0	0	0	0	0	1	0	0	0	0
A0A341CIE5	UP000252040	Neophocaena asiaeorientalis	Chordata	Metazoa	0	0	0	0	0	0	0	0	0	0	0	0	0	0	0	0	0	0	0	0	0	0	0	0	0	0	0	0	0	0	0	0	0	0	0	0	0	0	0	0	1	0	0	0	0
A0A2Y9Q8H3	UP000248483	Delphinapterus leucas	Chordata	Metazoa	0	0	0	0	0	0	0	0	0	0	0	0	0	0	0	0	0	0	0	0	0	0	0	0	0	0	0	0	0	0	0	0	0	0	0	0	0	0	0	0	1	0	0	0	0
A0A6J3DZ90	UP000504639	Aythya fuligula	Chordata	Metazoa	0	0	0	0	0	0	0	0	0	0	0	0	0	0	0	0	0	0	0	0	0	0	0	0	0	0	0	0	0	0	0	0	0	0	0	0	0	0	0	0	1	0	0	0	0
G5AWP4	UP000006813	Heterocephalus glaber	Chordata	Metazoa	0	0	0	0	0	0	0	0	0	0	0	0	0	0	0	0	0	0	0	0	0	0	0	0	0	0	0	0	0	0	0	0	0	0	0	0	0	0	0	0	1	0	0	0	0
L5KTH8	UP000010552	Pteropus alecto	Chordata	Metazoa	0	0	0	0	0	0	0	0	0	0	0	0	0	0	0	0	0	0	0	0	0	0	0	0	0	0	0	0	0	0	0	0	0	0	0	0	0	0	0	0	1	0	0	0	0
A0A6P9ATN8	UP000515157	Pantherophis guttatus	Chordata	Metazoa	0	0	0	0	0	0	0	0	0	0	0	0	0	0	0	0	0	0	0	0	0	0	0	0	0	0	0	0	0	0	0	0	0	0	0	0	0	0	0	0	1	0	0	0	0
A0A6J0TAL3	UP000504619	Pogona vitticeps	Chordata	Metazoa	0	0	0	0	0	0	0	0	0	0	0	0	0	0	0	0	0	0	0	0	0	0	0	0	0	0	0	0	0	0	0	0	0	0	0	0	0	0	0	0	1	0	0	0	0
A0A8J6DPA7	UP000700334	Galemys pyrenaicus	Chordata	Metazoa	0	0	0	0	0	0	0	0	0	0	0	0	0	0	0	0	0	0	0	0	0	0	0	0	0	0	0	0	0	0	0	0	0	0	0	0	0	0	0	0	1	0	0	0	0
A0A6P7NAD4	UP000515150	Betta splendens	Chordata	Metazoa	0	0	0	0	0	0	0	0	0	0	0	0	0	0	0	0	0	0	0	0	0	0	0	0	0	0	0	0	0	0	0	0	0	0	0	0	0	0	0	0	1	0	0	0	0
A6N7Y9	UP000000539	Gallus gallus	Chordata	Metazoa	0	0	0	0	0	0	0	0	0	0	0	0	0	0	0	0	0	0	0	0	0	0	0	0	0	0	0	0	0	0	0	0	0	0	0	0	0	0	0	0	1	0	0	0	0
A0A6J1VSF3	UP000504612	Notechis scutatus	Chordata	Metazoa	0	0	0	0	0	0	0	0	0	0	0	0	0	0	0	0	0	0	0	0	0	0	0	0	0	0	0	0	0	0	0	0	0	0	0	0	0	0	0	0	1	0	0	0	0
A0A340X908	UP000265300	Lipotes vexillifer	Chordata	Metazoa	0	0	0	0	0	0	0	0	0	0	0	0	0	0	0	0	0	0	0	0	0	0	0	0	0	0	0	0	0	0	0	0	0	0	0	0	0	0	0	0	1	0	0	0	0
A0A1L8I0U8	UP000186698	Xenopus laevis	Chordata	Metazoa	0	0	0	0	0	0	0	0	0	0	0	0	0	0	0	0	0	0	0	0	0	0	0	0	0	0	0	0	0	0	0	0	0	0	0	0	0	0	0	0	1	0	0	0	0
A0A6G1Q0C7	UP000503349	Channa argus	Chordata	Metazoa	0	0	0	0	0	0	0	0	0	0	0	0	0	0	0	0	0	0	0	0	0	0	0	0	0	0	0	0	0	0	0	0	0	0	0	0	0	0	0	0	1	0	0	0	0
A0A218UC08	UP000197619	Lonchura striata	Chordata	Metazoa	0	0	0	0	0	0	0	0	0	0	0	0	0	0	0	0	0	0	0	0	0	0	0	0	0	0	0	0	0	0	0	0	0	0	0	0	0	0	0	0	1	0	0	0	0
A0A8T2KEY4	UP000812440	Hymenochirus boettgeri	Chordata	Metazoa	0	0	0	0	0	0	0	0	0	0	0	0	0	0	0	0	0	0	0	0	0	0	0	0	0	0	0	0	0	0	0	0	0	0	0	0	0	0	0	0	1	0	0	0	0
A0A1S3PI55	UP000087266	Salmo salar	Chordata	Metazoa	0	0	0	0	0	0	0	0	0	0	0	0	0	0	0	0	0	0	0	0	0	0	0	0	0	0	0	0	0	0	0	0	0	0	0	0	0	0	0	0	1	0	0	0	0
A0A8N5EQN4	UP000504602	Geospiza fortis	Chordata	Metazoa	0	0	0	0	0	0	0	0	0	0	0	0	0	0	0	0	0	0	0	0	0	0	0	0	0	0	0	0	0	0	0	0	0	0	0	0	0	0	0	0	1	0	0	0	0
A0AA88SN71	UP001187415	Channa striata	Chordata	Metazoa	0	0	0	0	0	0	0	0	0	0	0	0	0	0	0	0	0	0	0	0	0	0	0	0	0	0	0	0	0	0	0	0	0	0	0	0	0	0	0	0	1	0	0	0	0
A0A3Q3VLJ3	UP000261620	Mola mola	Chordata	Metazoa	0	0	0	0	0	0	0	0	0	0	0	0	0	0	0	0	0	0	0	0	0	0	0	0	0	0	0	0	0	0	0	0	0	0	0	0	0	0	0	0	1	0	0	0	0
A0A9Q1GB47	UP001152622	Synaphobranchus kaupii	Chordata	Metazoa	0	0	0	0	0	0	0	0	0	0	0	0	0	0	0	0	0	0	0	0	0	0	0	0	0	0	0	0	0	0	0	0	0	0	0	0	0	0	0	0	1	0	0	0	0
A0A6P7IZI6	UP000515145	Parambassis ranga	Chordata	Metazoa	0	0	0	0	0	0	0	0	0	0	0	0	0	0	0	0	0	0	0	0	0	0	0	0	0	0	0	0	0	0	0	0	0	0	0	0	0	0	0	0	1	0	0	0	0
A0A9W7WFJ2	UP001059041	Triplophysa rosa	Chordata	Metazoa	0	0	0	0	0	0	0	0	0	0	0	0	0	0	0	0	0	0	0	0	0	0	0	0	0	0	0	0	0	0	0	0	0	0	0	0	0	0	0	0	1	0	0	0	0
A0A9Y3QVP2	UP000695023	Pundamilia nyererei	Chordata	Metazoa	0	0	0	0	0	0	0	0	0	0	0	0	0	0	0	0	0	0	0	0	0	0	0	0	0	0	0	0	0	0	0	0	0	0	0	0	0	0	0	0	1	0	0	0	0
A0A9N7V9U7	UP001153269	Pleuronectes platessa	Chordata	Metazoa	0	0	0	0	0	0	0	0	0	0	0	0	0	0	0	0	0	0	0	0	0	0	0	0	0	0	0	0	0	0	0	0	0	0	0	0	0	0	0	0	1	0	0	0	0
A0A484DD65	UP000295070	Perca flavescens	Chordata	Metazoa	0	0	0	0	0	0	0	0	0	0	0	0	0	0	0	0	0	0	0	0	0	0	0	0	0	0	0	0	0	0	0	0	0	0	0	0	0	0	0	0	1	0	0	0	0
A0A6A5FCX5	UP000465112	Perca fluviatilis	Chordata	Metazoa	0	0	0	0	0	0	0	0	0	0	0	0	0	0	0	0	0	0	0	0	0	0	0	0	0	0	0	0	0	0	0	0	0	0	0	0	0	0	0	0	1	0	0	0	0
A0A6P4XVM6	UP000515135	Branchiostoma belcheri	Chordata	Metazoa	0	0	0	0	0	0	0	0	0	0	0	0	0	0	0	0	0	0	0	0	0	0	0	0	0	0	0	0	0	0	0	0	0	0	0	0	0	0	0	0	1	0	0	0	0
A0A6P4Y8E0	UP000515135	Branchiostoma belcheri	Chordata	Metazoa	0	0	0	0	0	0	0	0	0	0	0	0	0	0	0	0	0	0	0	0	0	0	0	0	0	0	0	0	0	0	0	0	0	0	0	0	0	0	0	0	1	0	0	0	0
A0A8W8KK17	UP000005408	Magallana gigas	Mollusca	Metazoa	0	0	0	0	0	0	0	0	0	0	0	0	0	0	0	0	0	0	0	0	0	0	0	0	0	0	0	0	0	0	0	0	0	0	0	0	0	0	0	0	1	0	0	0	0
A0A8C5Q026	UP000694569	Leptobrachium leishanense	Chordata	Metazoa	0	0	0	0	0	0	0	0	0	0	0	0	0	0	0	0	0	0	0	0	0	0	0	0	0	0	0	0	0	0	0	0	0	0	0	0	0	0	0	0	1	0	0	0	0
A0A8C5R2W9	UP000694569	Leptobrachium leishanense	Chordata	Metazoa	0	0	0	0	0	0	0	0	0	0	0	0	0	0	0	0	0	0	0	0	0	0	0	0	0	0	0	0	0	0	0	0	0	0	0	0	0	0	0	0	1	0	0	0	0
A0A9J7LZW9	UP000001554	Branchiostoma floridae	Chordata	Metazoa	0	0	0	0	0	0	0	0	0	0	0	0	0	0	0	0	0	0	0	0	0	0	0	0	0	0	0	0	0	0	0	0	0	0	0	0	0	0	0	0	1	0	0	0	0
A0A2I4BIC6	UP000192220	Austrofundulus limnaeus	Chordata	Metazoa	0	0	0	0	0	0	0	0	0	0	0	0	0	0	0	0	0	0	0	0	0	0	0	0	0	0	0	0	0	0	0	0	0	0	0	0	0	0	0	0	1	0	0	0	0
A0A9D3QC53	UP001046870	Megalops atlanticus	Chordata	Metazoa	0	0	0	0	0	0	0	0	0	0	0	0	0	0	0	0	0	0	0	0	0	0	0	0	0	0	0	0	0	0	0	0	0	0	0	0	0	0	0	0	1	0	0	0	0
A0A6P6NXX5	UP000515129	Carassius auratus	Chordata	Metazoa	0	0	0	0	0	0	0	0	0	0	0	0	0	0	0	0	0	0	0	0	0	0	0	0	0	0	0	0	0	0	0	0	0	0	0	0	0	0	0	0	1	0	0	0	0
A0A8T0AT42	UP000606274	Silurus meridionalis	Chordata	Metazoa	0	0	0	0	0	0	0	0	0	0	0	0	0	0	0	0	0	0	0	0	0	0	0	0	0	0	0	0	0	0	0	0	0	0	0	0	0	0	0	0	1	0	0	0	0
A0AA88ML44	UP001187315	Tachysurus vachellii	Chordata	Metazoa	0	0	0	0	0	0	0	0	0	0	0	0	0	0	0	0	0	0	0	0	0	0	0	0	0	0	0	0	0	0	0	0	0	0	0	0	0	0	0	0	1	0	0	0	0
A0A7J6CR18	UP000579812	Onychostoma macrolepis	Chordata	Metazoa	0	0	0	0	0	0	0	0	0	0	0	0	0	0	0	0	0	0	0	0	0	0	0	0	0	0	0	0	0	0	0	0	0	0	0	0	0	0	0	0	1	0	0	0	0
A0AA89BRV1	UP001186944	Pinctada imbricata	Mollusca	Metazoa	0	0	0	0	0	0	0	0	0	0	0	0	0	0	0	0	0	0	0	0	0	0	0	0	0	0	0	0	0	0	0	0	0	0	0	0	0	0	0	0	1	0	0	0	0
A0A553MZQ7	UP000316079	Danionella translucida	Chordata	Metazoa	0	0	0	0	0	0	0	0	0	0	0	0	0	0	0	0	0	0	0	0	0	0	0	0	0	0	0	0	0	0	0	0	0	0	0	0	0	0	0	0	1	0	0	0	0
A0A673CSH6	UP000472271	Sphaeramia orbicularis	Chordata	Metazoa	0	0	0	0	0	0	0	0	0	0	0	0	0	0	0	0	0	0	0	0	0	0	0	0	0	0	0	0	0	0	0	0	0	0	0	0	0	0	0	0	1	0	0	0	0
A0A3S2M5R2	UP000283210	Oryzias javanicus	Chordata	Metazoa	0	0	0	0	0	0	0	0	0	0	0	0	0	0	0	0	0	0	0	0	0	0	0	0	0	0	0	0	0	0	0	0	0	0	0	0	0	0	0	0	1	0	0	0	0
A0A9D3SQW3	UP000824219	Hemibagrus wyckioides	Chordata	Metazoa	0	0	0	0	0	0	0	0	0	0	0	0	0	0	0	0	0	0	0	0	0	0	0	0	0	0	0	0	0	0	0	0	0	0	0	0	0	0	0	0	1	0	0	0	0
A0AA88Q118	UP001187343	Cirrhinus molitorella	Chordata	Metazoa	0	0	0	0	0	0	0	0	0	0	0	0	0	0	0	0	0	0	0	0	0	0	0	0	0	0	0	0	0	0	0	0	0	0	0	0	0	0	0	0	1	0	0	0	0
A0A9D3M2F5	UP001044222	Anguilla anguilla	Chordata	Metazoa	0	0	0	0	0	0	0	0	0	0	0	0	0	0	0	0	0	0	0	0	0	0	0	0	0	0	0	0	0	0	0	0	0	0	0	0	0	0	0	0	1	0	0	0	0
A0A6P8FBG7	UP000515152	Clupea harengus	Chordata	Metazoa	0	0	0	0	0	0	0	0	0	0	0	0	0	0	0	0	0	0	0	0	0	0	0	0	0	0	0	0	0	0	0	0	0	0	0	0	0	0	0	0	1	0	0	0	0
Q8UVX0	UP000000437	Danio rerio	Chordata	Metazoa	0	0	0	0	0	0	0	0	0	0	0	0	0	0	0	0	0	0	0	0	0	0	0	0	0	0	0	0	0	0	0	0	0	0	0	0	0	0	0	0	1	0	0	0	0
A0A5A9NW82	UP000324632	Triplophysa tibetana	Chordata	Metazoa	0	0	0	0	0	0	0	0	0	0	0	0	0	0	0	0	0	0	0	0	0	0	0	0	0	0	0	0	0	0	0	0	0	0	0	0	0	0	0	0	1	0	0	0	0
A0A9Q1D6N9	UP001152803	Conger conger	Chordata	Metazoa	0	0	0	0	0	0	0	0	0	0	0	0	0	0	0	0	0	0	0	0	0	0	0	0	0	0	0	0	0	0	0	0	0	0	0	0	0	0	0	0	1	0	0	0	0
A0A5N5NLC9	UP000327468	Pangasianodon hypophthalmus	Chordata	Metazoa	0	0	0	0	0	0	0	0	0	0	0	0	0	0	0	0	0	0	0	0	0	0	0	0	0	0	0	0	0	0	0	0	0	0	0	0	0	0	0	0	1	0	0	0	0
A0A673GY50	UP000472270	Sinocyclocheilus rhinocerous	Chordata	Metazoa	0	0	0	0	0	0	0	0	0	0	0	0	0	0	0	0	0	0	0	0	0	0	0	0	0	0	0	0	0	0	0	0	0	0	0	0	0	0	0	0	1	0	0	0	0
A0A1L8HK01	UP000186698	Xenopus laevis	Chordata	Metazoa	0	0	0	0	0	0	0	0	0	0	0	0	0	0	0	0	0	0	0	0	0	0	0	0	0	0	0	0	0	0	0	0	0	0	0	0	0	0	0	0	1	0	0	0	0
A0A9J7LYS3	UP000001554	Branchiostoma floridae	Chordata	Metazoa	0	0	0	0	0	0	0	0	0	0	0	0	0	0	0	0	0	0	0	0	0	0	0	0	0	0	0	0	0	0	0	0	0	0	0	0	0	0	0	0	1	0	0	0	0
A0A6J2QAX0	UP000504630	Cottoperca gobio	Chordata	Metazoa	0	0	0	0	0	0	0	0	0	0	0	0	0	0	0	0	0	0	0	0	0	0	0	0	0	0	0	0	0	0	0	0	0	0	0	0	0	0	0	0	1	0	0	0	0
A0A834CNI8	UP000646548	Oryzias melastigma	Chordata	Metazoa	0	0	0	0	0	0	0	0	0	0	0	0	0	0	0	0	0	0	0	0	0	0	0	0	0	0	0	0	0	0	0	0	0	0	0	0	0	0	0	0	1	0	0	0	0
A0A6P6PCQ5	UP000515129	Carassius auratus	Chordata	Metazoa	0	0	0	0	0	0	0	0	0	0	0	0	0	0	0	0	0	0	0	0	0	0	0	0	0	0	0	0	0	0	0	0	0	0	0	0	0	0	0	0	1	0	0	0	0
A0A6P8TVU7	UP000515161	Gymnodraco acuticeps	Chordata	Metazoa	0	0	0	0	0	0	0	0	0	0	0	0	0	0	0	0	0	0	0	0	0	0	0	0	0	0	0	0	0	0	0	0	0	0	0	0	0	0	0	0	1	0	0	0	0
A0A8T2KBL3	UP000812440	Hymenochirus boettgeri	Chordata	Metazoa	0	0	0	0	0	0	0	0	0	0	0	0	0	0	0	0	0	0	0	0	0	0	0	0	0	0	0	0	0	0	0	0	0	0	0	0	0	0	0	0	1	0	0	0	0
A0A5C6N619	UP000324091	Takifugu flavidus	Chordata	Metazoa	0	0	0	0	0	0	0	0	0	0	0	0	0	0	0	0	0	0	0	0	0	0	0	0	0	0	0	0	0	0	0	0	0	0	0	0	0	0	0	0	1	0	0	0	0
A0A9D3LQC7	UP001044222	Anguilla anguilla	Chordata	Metazoa	0	0	0	0	0	0	0	0	0	0	0	0	0	0	0	0	0	0	0	0	0	0	0	0	0	0	0	0	0	0	0	0	0	0	0	0	0	0	0	0	1	0	0	0	0
A0A6J2V1Q7	UP000504632	Chanos chanos	Chordata	Metazoa	0	0	0	0	0	0	0	0	0	0	0	0	0	0	0	0	0	0	0	0	0	0	0	0	0	0	0	0	0	0	0	0	0	0	0	0	0	0	0	0	1	0	0	0	0
V4B7N4	UP000030746	Lottia gigantea	Mollusca	Metazoa	0	0	0	0	0	0	0	0	0	0	0	0	0	0	0	0	0	0	0	0	0	0	0	0	0	0	0	0	0	0	0	0	0	0	0	0	0	0	0	0	1	0	0	0	0
A0A1S3J512	UP000085678	Lingula anatina	Brachiopoda	Metazoa	0	0	0	0	0	0	0	0	0	0	0	0	0	0	0	0	0	0	0	0	0	0	0	0	0	0	0	0	0	0	0	0	0	0	0	0	0	0	0	0	2	0	0	0	0
A0A6J2HM76	UP000504627	Pipra filicauda	Chordata	Metazoa	0	0	0	0	0	0	0	0	0	0	0	0	0	0	0	0	0	0	0	0	0	0	0	0	0	0	0	0	0	0	0	0	0	0	0	0	0	0	0	0	1	0	0	0	0
A0A0L7QN65	UP000053825	Habropoda laboriosa	Arthropoda	Metazoa	0	0	0	0	0	0	0	0	0	0	0	0	0	0	0	0	0	0	0	0	0	0	0	0	0	0	0	0	0	0	0	0	0	0	0	0	0	0	0	0	1	0	0	0	0
A0A914A6P0	UP000887568	Patiria miniata	Echinodermata	Metazoa	0	0	0	0	0	0	0	0	0	0	0	0	0	0	0	0	0	0	0	0	0	0	0	0	0	0	0	0	0	0	0	0	0	0	0	0	0	0	0	0	1	0	0	0	0
A0A0L7RKS4	UP000053825	Habropoda laboriosa	Arthropoda	Metazoa	0	0	0	0	0	0	0	0	0	0	0	0	0	0	0	0	0	0	0	0	0	0	0	0	0	0	0	0	0	0	0	0	0	0	0	0	0	0	0	0	1	0	0	0	0
A0A819NWJ9	UP000663884	Rotaria sp. Silwood2	Rotifera	Metazoa	0	0	0	0	0	0	0	0	0	0	0	0	0	0	0	0	0	0	0	0	0	0	0	0	0	0	0	0	0	0	0	0	0	0	0	0	0	0	0	0	1	0	0	0	0
A0A6P4YPW2	UP000515135	Branchiostoma belcheri	Chordata	Metazoa	0	0	0	0	0	0	0	0	0	0	0	0	0	0	0	0	0	0	0	0	0	0	0	0	0	0	0	0	0	0	0	0	0	0	0	0	0	0	0	0	1	0	0	0	0
A0A913WYK3	UP000887567	Exaiptasia diaphana	Cnidaria	Metazoa	0	0	0	0	0	0	0	0	0	0	0	0	0	0	0	0	0	0	0	0	0	0	0	0	0	0	0	0	0	0	0	0	0	0	0	0	0	0	0	0	1	0	0	0	0
A0A8B7ZWQ5	UP000694845	Acanthaster planci	Echinodermata	Metazoa	0	0	0	0	0	0	0	0	0	0	0	0	0	0	0	0	0	0	0	0	0	0	0	0	0	0	0	0	0	0	0	0	0	0	0	0	0	0	0	0	1	0	0	0	0
A0A210PYP0	UP000242188	Mizuhopecten yessoensis	Mollusca	Metazoa	0	0	0	0	0	0	0	0	0	0	0	0	0	0	0	0	0	0	0	0	0	0	0	0	0	0	0	0	0	0	0	0	0	0	0	0	0	0	0	0	1	0	0	0	0
A0A9J7LZS9	UP000001554	Branchiostoma floridae	Chordata	Metazoa	0	0	0	0	0	0	0	0	0	0	0	0	0	0	0	0	0	0	0	0	0	0	0	0	0	0	0	0	0	0	0	0	0	0	0	0	0	0	0	0	1	0	0	0	0
A0A7J6A165	UP000593565	Ameiurus melas	Chordata	Metazoa	0	0	0	0	0	0	0	0	0	0	0	0	0	0	0	0	0	0	0	0	0	0	0	0	0	0	0	0	0	0	0	0	0	0	0	0	0	0	0	0	1	0	0	0	0
A0A6P8HSQ4	UP000515163	Actinia tenebrosa	Cnidaria	Metazoa	0	0	0	0	0	0	0	0	0	0	0	0	0	0	0	0	0	0	0	0	0	0	0	0	0	0	0	0	0	0	0	0	0	0	0	0	0	0	0	0	1	0	0	0	0
A0A9Q1ATR2	UP001142489	Phrynocephalus forsythii	Chordata	Metazoa	0	0	0	0	0	0	0	0	0	0	0	0	0	0	0	0	0	0	0	0	0	0	0	0	0	0	0	0	0	0	0	0	0	0	0	0	0	0	0	0	1	0	0	0	0
A0A913YZG0	UP000887568	Patiria miniata	Echinodermata	Metazoa	0	0	0	0	0	0	0	0	0	0	0	0	0	0	0	0	0	0	0	0	0	0	0	0	0	0	0	0	0	0	0	0	0	0	0	0	0	0	0	0	1	0	0	0	0
A0A913YXP2	UP000887568	Patiria miniata	Echinodermata	Metazoa	0	0	0	0	0	0	0	0	0	0	0	0	0	0	0	0	0	0	0	0	0	0	0	0	0	0	0	0	0	0	0	0	0	0	0	0	0	0	0	0	1	0	0	0	0
A7RFC2	UP000001593	Nematostella vectensis	Cnidaria	Metazoa	0	0	0	0	0	0	0	0	0	0	0	0	0	0	0	0	0	0	0	0	0	0	0	0	0	0	0	0	0	0	0	0	0	0	0	0	0	0	0	0	1	0	0	0	0
A0A6P8I018	UP000515163	Actinia tenebrosa	Cnidaria	Metazoa	0	0	0	0	0	0	0	0	0	0	0	0	0	0	0	0	0	0	0	0	0	0	0	0	0	0	0	0	0	0	0	0	0	0	0	0	0	0	0	0	1	0	0	0	0
A0A913YY09	UP000887568	Patiria miniata	Echinodermata	Metazoa	0	0	0	0	0	0	0	0	0	0	0	0	0	0	0	0	0	0	0	0	0	0	0	0	0	0	0	0	0	0	0	0	0	0	0	0	0	0	0	0	1	0	0	0	0
A0A913YZ92	UP000887568	Patiria miniata	Echinodermata	Metazoa	0	0	0	0	0	0	0	0	0	0	0	0	0	0	0	0	0	0	0	0	0	0	0	0	0	0	0	0	0	0	0	0	0	0	0	0	0	0	0	0	1	0	0	0	0
A0A913YYN9	UP000887568	Patiria miniata	Echinodermata	Metazoa	0	0	0	0	0	0	0	0	0	0	0	0	0	0	0	0	0	0	0	0	0	0	0	0	0	0	0	0	0	0	0	0	0	0	0	0	0	0	0	0	1	0	0	0	0
A0A2B4SRI4	UP000225706	Stylophora pistillata	Cnidaria	Metazoa	0	0	0	0	0	0	0	0	0	0	0	0	0	0	0	0	0	0	0	0	0	0	0	0	0	0	0	0	0	0	0	0	0	0	0	0	0	0	0	0	1	0	0	0	0
A0A6J1YK57	UP000504626	Acinonyx jubatus	Chordata	Metazoa	0	0	0	0	0	0	0	0	0	0	0	0	0	0	0	0	0	0	0	0	0	0	0	0	0	0	0	0	0	0	0	0	0	0	0	0	0	0	0	0	1	0	0	0	0
A0A8C4G1C3	UP000694580	Denticeps clupeoides	Chordata	Metazoa	0	0	0	0	0	0	0	0	0	0	0	0	0	0	0	0	0	0	0	0	0	0	0	0	0	0	0	0	0	0	0	0	0	0	0	0	0	0	0	0	1	0	0	0	0
A0A9Q1CDT2	UP001152320	Holothuria leucospilota	Echinodermata	Metazoa	0	0	0	0	0	0	0	0	0	0	0	0	0	0	0	0	0	0	0	0	0	0	0	0	0	0	0	0	0	0	0	0	0	0	0	0	0	0	0	0	1	0	0	0	0
E2AFE7	UP000000311	Camponotus floridanus	Arthropoda	Metazoa	0	0	0	0	0	0	0	0	0	0	0	0	0	0	0	0	0	0	0	0	0	0	0	0	0	0	0	0	0	0	0	0	0	0	0	0	0	0	0	0	1	0	0	0	0
A0AA39FAV4	UP001168990	Microctonus aethiopoides	Arthropoda	Metazoa	0	0	0	0	0	0	0	0	0	0	0	0	0	0	0	0	0	0	0	0	0	0	0	0	0	0	0	0	0	0	0	0	0	0	0	0	0	0	0	0	1	0	0	0	0
A0A6J0BE31	UP000504622	Neodiprion lecontei	Arthropoda	Metazoa	0	0	0	0	0	0	0	0	0	0	0	0	0	0	0	0	0	0	0	0	0	0	0	0	0	0	0	0	0	0	0	0	0	0	0	0	0	0	0	0	1	0	0	0	0
A0A913YZ00	UP000887568	Patiria miniata	Echinodermata	Metazoa	0	0	0	0	0	0	0	0	0	0	0	0	0	0	0	0	0	0	0	0	0	0	0	0	0	0	0	0	0	0	0	0	0	0	0	0	0	0	0	0	1	0	0	0	0
A0A151P1R4	UP000050525	Alligator mississippiensis	Chordata	Metazoa	0	0	0	0	0	0	0	0	0	0	0	0	0	0	0	0	0	0	0	0	0	0	0	0	0	0	0	0	0	0	0	0	0	0	0	0	0	0	0	0	1	0	0	0	0
A0A195ERG9	UP000078541	Trachymyrmex septentrionalis	Arthropoda	Metazoa	0	0	0	0	0	0	0	0	0	0	0	0	0	0	0	0	0	0	0	0	0	0	0	0	0	0	0	0	0	0	0	0	0	0	0	0	0	0	0	0	1	0	0	0	0
A0A9Y4NW62	UP000694891	Stegastes partitus	Chordata	Metazoa	0	0	0	0	0	0	0	0	0	0	0	0	0	0	0	0	0	0	0	0	0	0	0	0	0	0	0	0	0	0	0	0	0	0	0	0	0	0	0	0	1	0	0	0	0
A0A6P7SUK0	UP000515154	Octopus vulgaris	Mollusca	Metazoa	0	0	0	0	0	0	0	0	0	0	0	0	0	0	0	0	0	0	0	0	0	0	0	0	0	0	0	0	0	0	0	0	0	0	0	0	0	0	0	0	1	0	0	0	0
A0A9R1TZW9	UP000694866	Fopius arisanus	Arthropoda	Metazoa	0	0	0	0	0	0	0	0	0	0	0	0	0	0	0	0	0	0	0	0	0	0	0	0	0	0	0	0	0	0	0	0	0	0	0	0	0	0	0	0	1	0	0	0	0
E2B9V7	UP000008237	Harpegnathos saltator	Arthropoda	Metazoa	0	0	0	0	0	0	0	0	0	0	0	0	0	0	0	0	0	0	0	0	0	0	0	0	0	0	0	0	0	0	0	0	0	0	0	0	0	0	0	0	1	0	0	0	0
A0A8D0H9V9	UP000694392	Sphenodon punctatus	Chordata	Metazoa	0	0	0	0	0	0	0	0	0	0	0	0	0	0	0	0	0	0	0	0	0	0	0	0	0	0	0	0	0	0	0	0	0	0	0	0	0	0	0	0	1	0	0	0	0
A0A6P8I0C6	UP000515163	Actinia tenebrosa	Cnidaria	Metazoa	0	0	0	0	0	0	0	0	0	0	0	0	0	0	0	0	0	0	0	0	0	0	0	0	0	0	0	0	0	0	0	0	0	0	0	0	0	0	0	0	1	0	0	0	0
A0A834U2J5	UP000617340	Vespula germanica	Arthropoda	Metazoa	0	0	0	0	0	0	0	0	0	0	0	0	0	0	0	0	0	0	0	0	0	0	0	0	0	0	0	0	0	0	0	0	0	0	0	0	0	0	0	0	1	0	0	0	0
A0A834KHU8	UP000614350	Vespula vulgaris	Arthropoda	Metazoa	0	0	0	0	0	0	0	0	0	0	0	0	0	0	0	0	0	0	0	0	0	0	0	0	0	0	0	0	0	0	0	0	0	0	0	0	0	0	0	0	1	0	0	0	0
A0A834PBU6	UP000600918	Vespula pensylvanica	Arthropoda	Metazoa	0	0	0	0	0	0	0	0	0	0	0	0	0	0	0	0	0	0	0	0	0	0	0	0	0	0	0	0	0	0	0	0	0	0	0	0	0	0	0	0	1	0	0	0	0
A0A0M8ZWK0	UP000053105	Melipona quadrifasciata	Arthropoda	Metazoa	0	0	0	0	0	0	0	0	0	0	0	0	0	0	0	0	0	0	0	0	0	0	0	0	0	0	0	0	0	0	0	0	0	0	0	0	0	0	0	0	1	0	0	0	0
[truncated: 9,856 more rows]
[truncated: 28 more columns]

## Sheet: Table S5
Table S5. Foldseek results of structural homology searches with human Ago/Piwi proteins
[truncated: 9 more rows]

[truncated: 4 more sheets: Table S6, Table S7, Table S8, Table S9]
